# Supplementary material for: piRNAs in the human retina and retinal pigment epithelium reveal a potential role in intracellular trafficking and oxidative stress
Source: Royal Society of Chemistry journal article supplement (doi:10.1039/d3mo00122a), 2024-01-15
Supplement: d3mo00122a3.xlsx [file d3mo00122a3.xlsx]

## Sheet: IP piRNA sequences
piRNA_Name	Sequence	Length
piR-hsa-20	TCGGAACCTGCAGACACTTGNGG	23
piR-hsa-95	TCTGGAGAGCCTGCATTGGGGGAGA	25
piR-hsa-138	TCATTCCTGACTCACCACCGTC	22
piR-hsa-182	ACAGCAGTTGAACATGGGTCAGTCGGTCC	29
piR-hsa-207	ACGAGGACCTAGACTGTGACAACGACC	27
piR-hsa-267	AAAGACTCTGTGTGACGAGTGCCTGATTGTC	31
piR-hsa-317	AAATGCAGTGTGGAACACAATGAACTGAAC	30
piR-hsa-320	AAATGGGACCAACCTTGATGAATATGTGGCT	31
piR-hsa-323	AAATGTGTAAGCAGGATCCGAGCGTTCTGC	30
piR-hsa-335	AACACAGGTGGATGTGAAGGATTTTCATTT	30
piR-hsa-354	AACCAAGACTTAGAGATGGAAAGTAGTTC	29
piR-hsa-369	AACGCCAGGGTGCACTGATAGAGGGA	26
piR-hsa-395	AAGACTTAGAGATGGAAAGTAGTTCAATGG	30
piR-hsa-405	AAGAGTCAGTGTGTGAGAGAGGTGGTC	27
piR-hsa-426	AAGCCAGGGATTGTGGGTTCGGGTCCCATCT	31
piR-hsa-470	AAGGGGAATGGTTGAGCCTCTGGAGA	26
piR-hsa-478	AAGGTGGACGGCGGTGGCGGCGGTGGCG	28
piR-hsa-493	AAGTGCTGTGGGTCTGTGCCAACCTCT	27
piR-hsa-515	AATGCAGTGTGGAACACAATGAACTGAAC	29
piR-hsa-560	ACACACACTTGATTGTTCTGGATGAA	26
piR-hsa-592	ACACGCCTGTAGACCCCTAGCAGCTGCC	28
piR-hsa-593	ACACGGTGCTCCAGACTGAAAGGTGG	26
piR-hsa-597	ACACTGAATTGTACTGTGCCAGGGATATA	29
piR-hsa-619	ACAGGTCTGTGATGCCCTTAGATGTCCGG	29
piR-hsa-624	ACAGTAGCATTGGTGGTTCAGTGGTA	26
piR-hsa-626	ACAGTGACAGCGACGAGGTGGACCGCA	27
piR-hsa-627	ACAGTGACAGCGACGAGGTGGACCGCAT	28
piR-hsa-637	ACATCATGGACCAAAGGACAGACAGGCTGC	30
piR-hsa-663	ACCAAGACTTAGAGATGGAAAGTAGTTCAA	30
piR-hsa-705	ACCAGGCTGTCAGTGACATTCGTGGT	26
piR-hsa-742	ACCCAAGTCACCTGTTGAACACTTTGCTGC	30
piR-hsa-765	ACCCCTTGTGAAGCCCAAGATCGTCAAAA	29
piR-hsa-766	ACCCGCCGTCGTTCAAGGTCTAGAGCGCCAA	31
piR-hsa-793	ACCGTCGTAGTTCCGACCATAAACGATGCC	30
piR-hsa-816	ACCTCTGGCTCTGGTATGATGTGACGTA	28
piR-hsa-820	ACCTGATGTTACATTGTAGTGTGCTGATG	29
piR-hsa-905	ACTCATCGAAAAGGGCCACGGTATTC	26
piR-hsa-912	ACTCGCTGACGGATTTGGACTTGGAGC	27
piR-hsa-952	ACTGTGTGCTGATTGTCACGTTCTGATT	28
piR-hsa-963	ACTTGTGATGTCTTCAAAGGAACCACTGATG	31
piR-hsa-985	AGAACAAGGAGCATGTGATTGAGGCC	26
piR-hsa-993	AGAACGTGTGGAAAACTAATGACTGAGC	28
piR-hsa-1008	AGAAGATTGAGGGTTCGTGTCCCTTCGTGG	30
piR-hsa-1043	AGACAGGTTAGTTTTACCCTACTGATGATGT	31
piR-hsa-1048	AGACCAGCCAGGTGTCTTCCCGGGCCCTGCC	31
piR-hsa-1062	AGACTTAGAGATGGAAAGTAGTTCAATGGT	30
piR-hsa-1075	AGAGACCAAGATCGATGCCGTGATGTATGTG	31
piR-hsa-1077	AGAGAGGGGCCCGTGCCTTGGAAAGCGTC	29
piR-hsa-1100	AGAGTTGCGCAGCGGAAGCGTGCTGGGCCCA	31
piR-hsa-1128	AGCAAAGATACTTCTTGGAATGGCTGC	27
piR-hsa-1144	AGCACAAAGAGAGGGACTAACTGATGC	27
piR-hsa-1152	AGCACATGATGATTCCAGCGTGCGTCTGAA	30
piR-hsa-1165	AGCAGAAGAAGCCTCTGGTGGGAAAAAAAG	30
piR-hsa-1177	AGCAGGACGGTGGCCATGGAAGTCGGAATCC	31
piR-hsa-1191	AGCAGTTGAACATGGGTCAGTCGGTCCTG	29
piR-hsa-1204	AGCATGGTGTAATATTAAGGACTGGG	26
piR-hsa-1207	AGCATTGGTGGTTCAGTGGTAGAATTCTCGC	31
piR-hsa-1219	AGCCAATGGGGCGAAGCTACCATCTGT	27
piR-hsa-1242	AGCCCGGCTAGCTCAGTCGGTAGAGCATGAG	31
piR-hsa-1243	AGCCCGGCTAGCTCAGTCGGTAGAGCATGAGA	32
piR-hsa-1245	AGCCCTGATGATGCCCACTCCTGAGC	26
piR-hsa-1247	AGCCGAGATAGCTTCCTGAAACGTGTGAAGGA	32
piR-hsa-1250	AGCCTATGATGGTTAGTTATCCCTGTCTGAAA	32
piR-hsa-1251	AGCCTCACGAAACTGGAATAAGCCTT	26
piR-hsa-1254	AGCCTGAGCAACATAGCGAGACCCCGTCTCTA	32
piR-hsa-1261	AGCCTGGAAATCCCTGCTTTGAGTTGNTCC	30
piR-hsa-1279	AGCGTCTACAAGGATGGAGGGGANCTACTCA	31
piR-hsa-1280	AGCGTTGGTGGTATAGTGGTGAGCATA	27
piR-hsa-1281	AGCGTTGGTGGTATAGTGGTGAGCATAGC	29
piR-hsa-1282	AGCGTTGGTGGTATAGTGGTGAGCATAGCTGC	32
piR-hsa-1336	AGGGGCCCGTGCCTTGGAAAGCGTCGC	27
piR-hsa-1338	AGGGGCTGAATGAAAATGGCCTTTCTGAAC	30
piR-hsa-1359	ATCGAGGCTAGAGTCACGCTTGGGTATCGGCT	32
piR-hsa-1361	ATCGCTGTACGGCCTTGATGAAAGCA	26
piR-hsa-1464	AGGACATTGATAACGAAGATTGGGAGA	27
piR-hsa-1511	AGGATATCTACCTGAGGCTGTTGGTCAAG	29
piR-hsa-1527	AGGATGTGTTTAGAGAGCTGATTGGA	26
piR-hsa-1580	AGGCCGTGATCGTATAGTGGTTAGTACTC	29
piR-hsa-1593	AGGCTCGTTGGTCTAGTGGTATGATTCTCG	30
piR-hsa-1701	AGGTATTCCTGCTAATGCTAGGCTGCCAA	29
piR-hsa-1710	AGGTGAGCGCTTTGCGCAGTGATGAC	26
piR-hsa-1711	AGGTGAGCGCTTTGCGCAGTGATGACCCT	29
piR-hsa-1731	AGGTTAGTTTTACCCTACTGATGATGTGTT	30
piR-hsa-1742	AGTAAGTGAAGATAAAGTGTGTCTGAGG	28
piR-hsa-1748	AGTAGAGACAGGGTTTCACCATGTTGGCCA	30
piR-hsa-1786	AGTGATAAGCATGGTTGGTTCCGGTGAGT	29
piR-hsa-1823	AGTTCGTGATGGATTTGCTTTTTTCTGATT	30
piR-hsa-1834	ATAACTGACGAAGACTACTCCTGTCTGATT	30
piR-hsa-1847	ATAGGGTTTACGACCTCGATGTTGGATC	28
piR-hsa-1848	ATAGGTTTGGTCCTAGCCTTTCTATT	26
piR-hsa-1849	ATAGGTTTGGTCCTAGCCTTTCTATTAGCTCT	32
piR-hsa-1872	ATCAGACCCCAGAAAAGGTGTTGGTTGA	28
piR-hsa-1873	ATCAGACCCCAGAAAAGGTGTTGGTTGAT	29
piR-hsa-1910	ATGAAGTCTATGAATCCTGGGAGAATCAGGAA	32
piR-hsa-1935	ATGATTGTAGTTTGTGTTTTCAGAGATGGT	30
piR-hsa-1944	ATGCAGTGTGGAACACAATGAACTGAAC	28
piR-hsa-1971	ATGCCTTTCNGTAGGCTGGTGTTGTTGCCTC	31
piR-hsa-1986	ATGCTCAGGGCTGAGTCTTAAAGAAGGGT	29
piR-hsa-1997	ATGCTTATTTGTTTTGACTCTTGTGTGCTGT	31
piR-hsa-2014	ATGGATGATGTGCGGGTTCAGGAGGTTC	28
piR-hsa-2097	ATTGCCAGTAAGCAAGGAGGTGGATCT	27
piR-hsa-2106	ATTGGTGGTTCAGTGGTAGAATTCTCGCC	29
piR-hsa-2107	ATTGGTGGTTCAGTGGTAGAATTCTCGCCTG	31
piR-hsa-2117	ATTTGGTGTATGTGCTTGGCTGAGGAGCCAA	31
piR-hsa-2129	CAAAGATGAGTGGTGAAAATCTGATC	26
piR-hsa-2134	CAAAGGAAGTAGCAGGCCCAGCTGGG	26
piR-hsa-2138	CAAAGTGATTGGTACCTCGTTGTCTGATG	29
piR-hsa-2143	CAAATCAAGATGGACTCGCAGGAGACTAC	29
piR-hsa-2153	CAACAAGTACCGTAAGGGAAAGTTGA	26
piR-hsa-2154	CAACAATAGGGTTTACGACCTCGATGTTGG	30
piR-hsa-2155	CAACAATAGGGTTTACGACCTCGATGTTGGA	31
piR-hsa-2167	CAACATGACAGATGCCGCTGTGTCCT	26
piR-hsa-2227	TAGTGTGGACTACCTGACAGATGTTT	26
piR-hsa-2235	TAGTTAACTCCATACTCTTCAGACTGTGA	29
piR-hsa-2272	TAGTTGGTCTTGTACATGCGCAGTGT	26
piR-hsa-2273	TAGTTGGTCTTGTACATGCGCAGTGTC	27
piR-hsa-2348	TATATCCGCATCCTGGCTGACCTAGA	26
piR-hsa-2391	TATCCATGGTGTTGAAGCGTCGAGCCGACT	30
piR-hsa-2409	TATCGACGAGTGCCGAGAGCTGAACCAGCGC	31
piR-hsa-2467	TATGACGTGGAGAAGAACAACAGCCGC	27
piR-hsa-2472	TATGAGAAGATCCTGAAGCTCACGGC	26
piR-hsa-2477	TATGAGCACAAGATCTTCGTTCAGGGC	27
piR-hsa-2491	TATGAGGAGACTCGAGGTGTGCTTAAGGT	29
piR-hsa-2553	TATGCTCTTGGGTGAAGGAAGGCTTGGT	28
piR-hsa-2565	TATGGACTGACCAGGTACCTGGATGGA	27
piR-hsa-2597	TATGTAGATGACATTCTCCTCTGTGCCC	28
piR-hsa-2618	TATGTGGTCCGAATCAGTGGTGGGAAC	27
piR-hsa-2630	TATGTTGGAATTGATCAACAAGGTTTGC	28
piR-hsa-2707	TATTGGACTGAACAAAGGGGGGCAAACAC	29
piR-hsa-2949	TCAAATGGCTGCAGATTGGTACATGAGAC	29
piR-hsa-3050	TCAAGAGAGATGATGCCAGTATGGAC	26
piR-hsa-3093	TCAAGGGTTGCTTCTGAGTGGTGTTT	26
piR-hsa-3098	TCAAGGTCTTGATGTGCATAGCTTCT	26
piR-hsa-3178	TCACAAAGATGAGTGGTGAAAATCTGATC	29
piR-hsa-3200	TCACAATGCTGACACTCAAACTGCTGACA	29
piR-hsa-3206	TCACACAGAGCACAGTCCTGTAGTTACCCA	30
piR-hsa-3248	TCACAGATGGAACAATGGCAAGAGCA	26
piR-hsa-3315	TCACAGTTGGAGTTCTCCAGCTCTGGAGGTGT	32
piR-hsa-3405	TCACCCGGCCCGGACACGGACAGGATTGACA	31
piR-hsa-3547	TCACTGTAAATCCAGGAAGGTGTGATGT	28
piR-hsa-3560	TCACTGTGAGGATGAACAGGATGACTGTC	29
piR-hsa-3561	TCACTGTGAGGATGAACAGGATGACTGTCTGC	32
piR-hsa-3616	TCAGAAGATTCCAGGTTCGACTCCTGGC	28
piR-hsa-3645	TCAGACATTTGGTGTATGTGCTTGGC	26
piR-hsa-3662	TCAGAGAAACAGTTTGTGGTGTTTGAGGG	29
piR-hsa-3669	TCAGAGAGAATTGGTTAGTAGAGTCCCA	28
piR-hsa-3691	TCAGAGCTTCAGAACCGGGGTTCCCGACAC	30
piR-hsa-3727	TCAGATGCATAGGTGATGCTTGGCCT	26
piR-hsa-3871	TCAGGAATCTGTGCAGACACCCCAGTGCC	29
piR-hsa-3913	TCAGGGTGTGCGTGCTCTGTGGAACTC	27
piR-hsa-3961	TCAGTGATGAGGCCTGGAATGTGCGCTG	28
piR-hsa-3979	TCAGTGTCCAACTGTGATTAGAAGCCT	27
piR-hsa-4021	TCATAGAGCTCCCTGGACACTGAACCTCG	29
piR-hsa-4092	TCATCTTCTCAGAGCTGCTGTCCAACCTG	29
piR-hsa-4094	TCATCTTCTCAGAGCTGCTGTCCAACCTGT	30
piR-hsa-4131	TCATGCCTGTAGGTTTCCATTGCTCT	26
piR-hsa-4213	TCATTTCTGCCTTTCTGTTGTAATTGATGCC	31
piR-hsa-4276	TCCAAAGGAGTGCTTGTGGAGATCGGATC	29
piR-hsa-4302	TCCAAATCAAGATGGACTCGCAGGAGACTA	30
piR-hsa-4425	TCCAAGGACAACAGCAAGCCAGAAGTGCCA	30
piR-hsa-4516	TCCACAACGTCAAGGAGCTGGAAGTGCTGC	30
piR-hsa-4524	TCCACACACCAAGCCTTGGATTGGTCTGGC	30
piR-hsa-4624	TCCACCTTTGGGTCGCTTTGCTGTTCGTGA	30
piR-hsa-4686	TCCACTGGTACACGGGCGAGGGCATGGATG	30
piR-hsa-4717	TCCAGAACGAACAGCCTGACACATACGCA	29
piR-hsa-4720	TCCAGAAGATGTTCTACATGCTGAAC	26
piR-hsa-4747	TCCAGACTTTGAACTTGCCTGCCAGCCTTC	30
piR-hsa-4852	TCCATGAGTTTACTCTGAGTTGACAGGCGA	30
piR-hsa-4896	TCCCCAAGTCTGGTGGACACAACTCCCAAGC	31
piR-hsa-4904	TCCGGGTACAAACATCTGAGGCACTGGC	28
piR-hsa-4922	TCCTGAGATTGTACTGGACCGTGACC	26
piR-hsa-4937	TCCTGTTTATGTGCTCTAGTTCCTTTGTATG	31
piR-hsa-4945	TCCTTAGGTCGCTGGTTCGAATCCGGCTCGA	31
piR-hsa-4946	TCCTTAGGTCGCTGGTTCGAATCCGGCTCGAA	32
piR-hsa-4947	TCCTTAGGTCGCTGGTTCGATTCCGGCTCGAA	32
piR-hsa-4954	TCCAGGACGTCTAGTGGATATGATGG	26
piR-hsa-5042	TCCAGGTAGAAGGCCAGGTGGTGGTTCAGT	30
piR-hsa-5067	TCCAGGTTCGACTCCTGGCTGGCTCGC	27
piR-hsa-5233	TCCATGTGCTCTGAGAGGTGGACTGAGGTC	30
piR-hsa-5259	TCCATTGGACGTGTTTGGGTCACCTCAGAGC	31
piR-hsa-5299	TCCCAAAGTGCTGGAATTACAGGCGTGA	28
piR-hsa-5315	TCCCAACAACGTCTTTGGACTCAGCTC	27
piR-hsa-5316	TCCCAACAACGTCTTTGGACTCAGCTCCT	29
piR-hsa-5317	TCCCAACAACGTCTTTGGACTCAGCTCCTG	30
piR-hsa-5327	TCCCAACTCTGGTGCTGGAGTAATGG	26
piR-hsa-5342	TCCCAAGCGAAATTGTGGGCAAGAGAATC	29
piR-hsa-5360	TCCCAAGTAGCTGGAACTACGGGTGTGC	28
piR-hsa-5370	TCCCAATGATGAGTTGCCATGCTAATACTGA	31
piR-hsa-5464	TCCCAGAGCTCCGACCTCATCCGCCA	26
piR-hsa-5474	TCCCAGATGCTGTCCATGGGCTTCTCTGA	29
piR-hsa-5484	TCCCAGCAGTGGAGGTGTTTGAAGGG	26
piR-hsa-5664	TCCCCAGGGCAGTAGGAATTGATATCTC	28
piR-hsa-5711	TCCCCGTGTTGCCTGAGCTTGATGACC	27
piR-hsa-5756	TCCCGATTGTGCTGACAGGAAGTGCTCTGT	30
piR-hsa-5768	TCCCGGCACGCTCCCTCTGCAGATGGTCGT	30
piR-hsa-5817	TCCCTACATTGATCAATGGCTGAGTT	26
piR-hsa-5818	TCCCTACATTGATCAATGGCTGAGTTT	27
piR-hsa-5819	TCCCTACATTGATCAATGGCTGAGTTTGG	29
piR-hsa-5889	TCCCTGATGGACGGGGAAGTCTTCTTTGTGT	31
piR-hsa-5934	TCCCTGGTAGTCTAGTGGTTAGGATTC	27
piR-hsa-5936	TCCCTGGTGGTCTAGTGGTTAGGATA	26
piR-hsa-5937	TCCCTGGTGGTCTAGTGGTTAGGATTCGGCA	31
piR-hsa-5938	TCCCTGGTGGTCTAGTGGTTAGGATTCGGCAC	32
piR-hsa-5939	TCCCTGGTTCGATCCCGGGTTTCGGCACC	29
piR-hsa-6031	TCCGAGGACGCGGAGGATGACGATGATG	28
piR-hsa-6042	TCCGAGTGCAGACCACGCCGGACTACAGCCC	31
piR-hsa-6052	TCCGATGTTTGTGATGTACCAACTGC	26
piR-hsa-6110	TCCGGAAAGTGGAAGGGGACATCTGG	26
piR-hsa-6112	TCCGGAAGGGCTTGATTGACGTGGAGA	27
piR-hsa-6114	TCCGGACACAGACCAGTAGTGGTCCATGGC	30
piR-hsa-6121	TCCGGCCCTCATGGCTTTGTGTCTGGAGCTC	31
piR-hsa-6143	TCCGTAGTGTACTGGTTATCACGTTCGCCTG	31
piR-hsa-6144	TCCGTAGTGTAGTGGTTATCACGTTCGCCT	30
piR-hsa-6145	TCCGTAGTGTAGTGGTTATCACGTTCGCCTCA	32
piR-hsa-6147	TCCGTAGTGTAGTGGTTATCACGTTCGCCTGA	32
piR-hsa-6162	TCCGTGATTGTGAAAAGTACAAGCCT	26
piR-hsa-6248	TCCTAACTCTGGTGGAACGAATGGATGA	28
piR-hsa-6284	TCCTACCAACGTGTGATGTCTCCCCC	26
piR-hsa-6321	TCCTAGAGGCCAAAAGGAAGGTAACGGGAAC	31
piR-hsa-6326	TCCTAGATTGTGTCTGGCAGCTGGTGCAC	29
piR-hsa-6341	TCCTAGGACTGAATCACCACCCCAGAAGAGCA	32
piR-hsa-6463	TCCTCATTAGTATAGTGGTGAGTATCCC	28
piR-hsa-6496	TCCTCCTACAAAGGCGTGTCTGTGGTTCCC	30
piR-hsa-6508	TCCTCGCAGAGAATGTGAACATGTGTGTGA	30
piR-hsa-6543	TCCTCTGCCTTTCTTCGACCAACTTTCTC	29
piR-hsa-6555	TCCTCTTGCTCCAGCAACCTCTCCTCTTGC	30
piR-hsa-6584	TCCTGAAGAACAGCCCCTTGGTGAGCCGCC	30
piR-hsa-6621	TCCTGATCTGTGTACTCATTGTCTGC	26
piR-hsa-6646	TCCTGCAGCTCCAGCAACCTCTCCTCTTGC	30
piR-hsa-6658	TCCTGCCTCTCAACAACCTCTTTGGAC	27
piR-hsa-6686	TCCTGGAACTTTGATTGTGATACGTG	26
piR-hsa-6758	TCCTGGTCTAAGGTGATTGAATCCTGAAG	29
piR-hsa-6839	TCCTTAGGTCGCTGGTTCGGTTCCGGCTCGA	31
piR-hsa-6840	TCCTTAGGTCGCTGGTTCGTTTCCGGCTCG	30
piR-hsa-6857	TCGCATCGGAACCTGCAGACACTTGTGGA	29
piR-hsa-6887	TCGTGCTGTTCGCTGGTGCTGATCAGGGC	29
piR-hsa-6905	TCTCACATGAGAACACTGCCTGGATGCATC	30
piR-hsa-7035	TCCTTGGGCCCATGAGGACTCTGTTCACTCTT	32
piR-hsa-7116	TCGAAGGTGGATTTAGCAGTAAACTGA	27
piR-hsa-7132	TCGACATCTCATCCATGCTTTGTGTC	26
piR-hsa-7150	TCGAGCAGCTATGATTTGGATTGTGGGA	28
piR-hsa-7193	TCGCCGTGATCGTATAGTGGTTAGTACTCTG	31
piR-hsa-7201	TCGCGAGTTCAAATCTCGCTGGGGCCT	27
piR-hsa-7207	TCGCGTCGGAACCTGCAGACACTCGTGGA	29
piR-hsa-7208	TCGCGTCGGAACCTGCAGACACTTGTGGA	29
piR-hsa-7238	TCGCTGGTTCGAATCCGGCTCGGAGGAC	28
piR-hsa-7239	TCGCTGGTTCGATTCCGGCTCGAAGGAC	28
piR-hsa-7259	TCGGAACCTGCAGACACTTGTGGAGG	26
piR-hsa-7281	TCGGACTCTACAGGCCAGCCTCTGCCTCA	29
piR-hsa-7287	TCGGAGATCTTGCAGGAGCTGGGCAA	26
piR-hsa-7327	TCGGCATCAATATGGTGACCTCCCGGG	27
piR-hsa-7335	TCGGCCTCTACGGTCTCATCGTCGCC	26
piR-hsa-7336	TCGGCGAAGGTTGGGACTCGACTGGTGT	28
piR-hsa-7410	TCGTCATTGGTGTCTAGCTGCTCACTC	27
piR-hsa-7423	TCGTGGAGTCTGAAGTCAAGTGCTGTAAGA	30
piR-hsa-7549	TCTACTGAACTGCCATGAGGAAACTG	26
piR-hsa-7553	TCTAGAAACCAGTTGGACAGTGCTCC	26
piR-hsa-7606	TCTATAACCTTAGCTAGAGTGTCGCC	26
piR-hsa-7636	TCTCAAAGTGAAAGGACCAGTTCGAAT	27
piR-hsa-7639	TCTCAACAACCTCTTTGGACTCAGTGCCTA	30
piR-hsa-7651	TCTCAATGGTGCTCACTTGCTTGGAAGCAG	30
piR-hsa-7654	TCTCACTGAAAAGTCTGGCTAATGCTCTT	29
piR-hsa-7695	TCTCAGGCTCGTAGTTCGCCTTCAAC	26
piR-hsa-7713	TCTCAGTGCTGCTGTCCAACCTGTACTCGC	30
piR-hsa-7719	TCTCATAATGAAGACATAGCCGATTCTCTGC	31
piR-hsa-7737	TCTCATTACTCCTGGTCTTGGGAGTTGCCT	30
piR-hsa-7745	TCTCCAACAAGAGAATAGTAGGCTGCATC	29
piR-hsa-7798	TCTCCGGGCCCAAAACTTACTCAAGTCAGAC	31
piR-hsa-7838	TCTCGGAGCTGCTGTCCAACCTGTACTCGCGT	32
piR-hsa-7846	TCTCGTGATATTGAGTGAGCGCTTGTGGGT	30
piR-hsa-7857	TCTCTAGCGCTGGGAATCAGTCACCCTGC	29
piR-hsa-7864	TCTCTCAGGGGCTTGGGCTGCAGGAC	26
piR-hsa-7996	TCTGAGAAGATACTGTTGTCCAACTGATC	29
piR-hsa-8030	TCTGAGGGTCCAGGGTTCATGTCCCTG	27
piR-hsa-8031	TCTGAGGGTCCAGGGTTCATGTCCCTGT	28
piR-hsa-8140	TCTGCATCCTGCGTCGGGACCACCACTGT	29
piR-hsa-8188	TCTGCCTGCAGTGTCAAATCGATGGCCTGGC	31
piR-hsa-8256	TCTGGAACATCTTTGCCTACACCCTG	26
piR-hsa-8382	TCTGTCCTTACTGCTGAACATCCTGCTT	28
piR-hsa-8390	TCTGTCTACTGTCGGACTCTACAGGTCAGC	30
piR-hsa-8403	TCTGTGACATCCCACCTCGTGGCCTCAAGA	30
piR-hsa-8430	TCTGTGGTACTCAGGGTGTGCGTGCTCTGT	30
piR-hsa-8433	TCTGTGTGCCTGGACCGATGTGTCTCTAA	29
piR-hsa-8530	TCTTCTCAGAGCTGCTGTCCAACCTGT	27
piR-hsa-8531	TCTTCTCAGAGCTGCTGTCCAACCTGTA	28
piR-hsa-8532	TCTTCTCAGAGCTGCTGTCCAACCTGTAC	29
piR-hsa-8533	TCTTCTCAGAGCTGCTGTCCAACCTGTACTC	31
piR-hsa-8536	TCTTCTCGGAGCTGCTGTCCAACCTG	26
piR-hsa-8540	TCTTCTCGGAGCTGCTGTCCAACCTGT	27
piR-hsa-8541	TCTTCTCGGAGCTGCTGTCCAACCTGTA	28
piR-hsa-8589	TCTTGCAGGAGACATAGAAATCAGATCCACAC	32
piR-hsa-8596	TCTTGCGCATACACAGGTTAGAACAAGT	28
piR-hsa-8629	TCTTGGCTGAGTCTACAGGCACAACTGCTGCC	32
piR-hsa-8642	TCTTGGTGACGACTTAAATCTGGGTTC	27
piR-hsa-8650	TCTTGTAAAGAAACGTCTTGTGCTCTCTGT	30
piR-hsa-8669	TCTTTAGTGGTGATTTCTGATATTTTGGCGC	31
piR-hsa-8670	TCTTTATACATGATTGTTAGCTGCTGT	27
piR-hsa-8715	TGAAAAAGCAGAGCGACTCGGTTAAGGGA	29
piR-hsa-8757	TGAAAAGTACCAAGAAGTGGAAGAAGACC	29
piR-hsa-8770	TGAAAATCGGCAGTGGGTTCCTGAGT	26
piR-hsa-8780	TGAAAATGGAGTGGTGAAGGCAGAGAAC	28
piR-hsa-8788	TGAAACAGGAAGACAAGATGGAGATGCTGTT	31
piR-hsa-8804	TGAAACCGGATGCTGAGTACCCTGAATGGC	30
piR-hsa-8837	TGAAAGAGTGTGTGTTGTGGGTTATGA	27
piR-hsa-8851	TGAAAGGAGAAGGCGCCGTCGGTCGC	26
piR-hsa-8882	TGAAATAGACGCATTGGATTTCTGGGC	27
piR-hsa-8985	TGAACAGGAGGTGAACTGTGTGGATTGC	28
piR-hsa-9010	TGAACATGGGTCAGTCGGTCCTGAGA	26
piR-hsa-9014	TGAACATTTTGAAGCTTGCTCCTGGT	26
piR-hsa-9024	TGAACCAGCGGATTGGTGAATGGGAGCTT	29
piR-hsa-9073	TGAACGTGCTGAACAAGAGCAACGAG	26
piR-hsa-9104	TGAAGGTGTTCCTGGAGAACGTGATTC	27
piR-hsa-9105	TGAAGGTGTTTCTGGAAAACGTGATTC	27
piR-hsa-9155	TGACATTCATGTTCAGCCTTTGACGACC	28
piR-hsa-9156	TGACATTCCAGACTTTGATGACTAGCACC	29
piR-hsa-9175	TGAGAGCTGGAGTCAGTGTGGTGTGT	26
piR-hsa-9182	TGAGAGGACCGTCATTCTGGGAAAGA	26
piR-hsa-9191	TGAACTGAACAGACGGAGAAGATGTGCT	28
piR-hsa-9208	TGAACTGTAGCACACCAGGCTGCCACGCCCT	31
piR-hsa-9226	TGAACTTTAGGAACACAGTTGGAGGTC	27
piR-hsa-9255	TGAAGAAGGCGGCTGTGCACTATGATC	27
piR-hsa-9280	TGAAGACTGAGGTATCTGTAGAAGTGAGGGA	31
piR-hsa-9282	TGAAGACTGAGGTATCTGTAGAAGTGAGGT	30
piR-hsa-9314	TGAAGATGAGGAACGTGATATGGGCCA	27
piR-hsa-9319	TGAAGATGGGGCAAGAATTTGTGGAGTC	28
piR-hsa-9332	TGAAGCAGAGGCAATGAATTACGAAG	26
piR-hsa-9340	TGAAGCATAGACTCTTTCATGGTAGACAGAT	31
piR-hsa-9361	TGAAGCTGCAGAACCAACGAGGTGGCC	27
piR-hsa-9378	TGAAGGAATGGACAAGAGTTGAGCAGC	27
piR-hsa-9389	TGAAGGATCGAAGGATGACTGTGGTGGGA	29
piR-hsa-9420	TGAAGTATGTGCCTGGTGTGAAATGATC	28
piR-hsa-9427	TGAAGTCTATGAATCCTGGGAGAATCAGGAA	31
piR-hsa-9485	TGAATCCATGTCCATTGCTGTGTAAC	26
piR-hsa-9491	TGAATCTGACAACAGAGGCTTACGACCCCTTA	32
piR-hsa-9498	TGAATGAAAATTCTGGGTGTAAAGAGT	27
piR-hsa-9527	TGAATGGATAGATGTGCTGTTTTGCC	26
piR-hsa-9554	TGAATGTCCAGACAGTGGAAGAGGTGT	27
piR-hsa-9596	TGACAAAGAAAAGAAGGAACAATGGTC	27
piR-hsa-9712	TGACAGAGAAAACAAGGTGGTGAACTATGCC	31
piR-hsa-9716	TGACAGAGAGCGTGTGAACGAGGCCCGTGT	30
piR-hsa-9742	TGACAGCAAGAAGTTCAAAGGTGACA	26
piR-hsa-9792	TGACAGGTTCTAAAGACTCTTTTCTGGTCCC	31
piR-hsa-9809	TGACAGTGATGACGAGTACGATCGAAG	27
piR-hsa-9815	TGACAGTGCTTTGAAGATCTCCTTTGA	27
piR-hsa-9839	TGACATACGATGGTGCACTGTTGGGC	26
piR-hsa-9933	TGACCACTATGAAGACTGGTGTGGGAA	27
piR-hsa-9954	TGACCAGGAAGCTGCCAAAAGGGACATGGA	30
piR-hsa-9999	TGACCCGTTGGACACGAGACGCTTGC	26
piR-hsa-10007	TGACCGAGAGAGCCTGCGGAACCTGCGCGGC	31
piR-hsa-10008	TGACCGAGTCTGCGAGGATCGCCCGT	26
piR-hsa-10015	TGACCGTGCTAACTGTGTGTACATAT	26
piR-hsa-10036	TGACCTCTGGCTCTGGTATGATGTGACGTA	30
piR-hsa-10040	TGACCTGAGTGAGCTGCCACCGCTGG	26
piR-hsa-10069	TGACGACTGTGCCATCTGTTGGGACTC	27
piR-hsa-10096	TGACGGAGCTGAGCATCAAGAGCGGC	26
piR-hsa-10100	TGACGGCCAAGTGATTTCTCTCCTGC	26
piR-hsa-10105	TGACGGTCCTCAGAACACCTCTGTGCCA	28
piR-hsa-10110	TGACGGTTCCCTGTCTCTGAAAGACCTT	28
piR-hsa-10122	TGACTAAGTGTGACGAAGGTGTTGAGC	27
piR-hsa-10127	TGACTACAAGACTTGTAACGTGCTGG	26
piR-hsa-10170	TGACTCCGTTGTGTGCAGATTCTGCTG	27
piR-hsa-10244	TGACTGTGAATCTGTACCTGACCCCAGGGC	30
piR-hsa-10246	TGACTGTGCTGTCCTGATTGTTGCTGC	27
piR-hsa-10279	TGACTTGAGAACAGCCTCTGCAGGCCCTGC	30
piR-hsa-10324	TGAGAAAGTTGATGTGATTGCCGGCTCCTC	30
piR-hsa-10345	TGAGAACATTGACGACGCTAAGGATGCCA	29
piR-hsa-10346	TGAGAACCAATGGGAAGGAGCCTGAGC	27
piR-hsa-10368	TGAGAAGAAGGAGATTGTGGTGTGAATGT	29
piR-hsa-10394	TGAGAAGCGGCGTCTGGAAGCTCGGA	26
piR-hsa-10395	TGAGAAGCTGATGAATCTTTTACAAGAGC	29
piR-hsa-10427	TGAGAAGTCGCCACCATGAGGAAGCTCCTC	30
piR-hsa-10496	TGAGACCAATGAAATCGCCAATGCCAAC	28
piR-hsa-10520	TGAGACGTTCCTACAGATGGATGAGGT	27
piR-hsa-10584	TGAGAGCCTACCTGGAGGGCACGTGC	26
piR-hsa-10610	TGAGAGGGGATGAGACGTTTGCTGTC	26
piR-hsa-10611	TGAGAGGGTGTCCAGTTTGTCTAGTG	26
piR-hsa-10623	TGAGAGGTTAGCCGTGATGAAAGCAGC	27
piR-hsa-10624	TGAGAGGTTAGCCGTGATGAAAGCAGCGT	29
piR-hsa-10631	TGAGAGTGATGAGTTGCACACTGGTGG	27
piR-hsa-10668	TGAGATGAAGCATAAGGTCTGTCGAT	26
piR-hsa-10678	TGAGATGATGGGCTTGGGAAACGGGC	26
piR-hsa-10691	TGAGATGCTGAAGAAGGGGTGGGATG	26
piR-hsa-10716	TGAGATTATGCCTGAGGTTGTGGAAAAGG	29
piR-hsa-10725	TGAGATTGGATCCCATCCTATGTGACTGC	29
piR-hsa-10802	TGAGCAGATGCTTAACGTGCAGAACA	26
piR-hsa-10813	TGAGCAGCTGGATGTCGCGTGCGGCC	26
piR-hsa-10824	TGAGCAGTCGCTGGAGCAGGTCTTCTCAA	29
piR-hsa-10892	TGAGCCGCTGGGGCAGAGGATCACGGACC	29
piR-hsa-10910	TGAGCGAAGACTGTGTGCCTAACCCCA	27
piR-hsa-10928	TGAGCTAGACTCGTGGTGACCAAAGC	26
piR-hsa-10929	TGAGCTATACCAGCGGGCCAAGAAAC	26
piR-hsa-11051	TGAGGACAAATGCAGTAGGTGTGTGT	26
piR-hsa-11080	TGAGGAGCCAATGGGGCGAAGCTACCATC	29
piR-hsa-11116	TGAGGTTGCAAAGAAATGCGTTGAGGA	27
piR-hsa-11120	TGAGGTTGTCGTGCTTTGGAAAGATG	26
piR-hsa-11173	TGATGGTGACCTGGAAGGCAGATGGTACC	29
piR-hsa-11178	TGATGGTGTCATCAAGGTGTTCAACGA	27
piR-hsa-11204	TGAGGATATCCAGTACATGCAGGTACCT	28
piR-hsa-11205	TGAGGATATGCAGGGCATTTTGGCATGA	28
piR-hsa-11209	TGAGGATCTTTCCTTTGACTGGGTGCTGT	29
piR-hsa-11210	TGAGGATGAACAGGATGACTGTCTGC	26
piR-hsa-11211	TGAGGATGAACAGGATGACTGTCTGCC	27
piR-hsa-11212	TGAGGATGAACAGGATGACTGTCTGCCT	28
piR-hsa-11213	TGAGGATGAACAGGATGACTGTCTGCCTA	29
piR-hsa-11214	TGAGGATGAACAGGATGACTGTCTGCCTG	29
piR-hsa-11215	TGAGGATGAACAGGATGACTGTCTGCCTGA	30
piR-hsa-11219	TGAGGATGATGGTTTTGATAGTGATAGC	28
piR-hsa-11241	TGAGGCAGAGAAGAACGAGCGTGTGC	26
piR-hsa-11252	TGAGGCCATCCTGGAGTACATTCTGC	26
piR-hsa-11256	TGAGGCCCCGGGTTCGATCCCCGGCA	26
piR-hsa-11275	TGAGGCTGCATAACTTGTTCGTGAAG	26
piR-hsa-11341	TGAGGGTTCGAGTCCCTTCGTGGTCGCC	28
piR-hsa-11360	TGAGGTAGTAGATTGTATAGTTGTGGGGTAGT	32
piR-hsa-11361	TGAGGTAGTAGGTTGTATAGTTTTAGGGTC	30
piR-hsa-11362	TGAGGTAGTAGGTTGTATGGTTTAGAGTTACA	32
piR-hsa-11405	TGAGGTGAGGGTTGTAGTAGATGCTT	26
piR-hsa-11461	TGAGTCACTGGCAAACATTGAGAGGCGC	28
piR-hsa-11537	TGAGTGCTCAGGTCCGAGCTGTGGTC	26
piR-hsa-11559	TGAGTGTAGTGTGGTAGGACCCCGGC	26
piR-hsa-11616	TGAGTTGGACCAAGGGAAGTATGATGC	27
piR-hsa-11651	TGATAACTGTGTACTTCTGGTGACTG	26
piR-hsa-11656	TGATAAGCATGGTTGGTTCCGGTGAGTGT	29
piR-hsa-11759	TGATCAACAAAGGGACCCGATCAAATGC	28
piR-hsa-11805	TGATCAGACACCAAAGAATCCACACAGGCG	30
piR-hsa-11809	TGATCAGATGTGGGCCGGGTGTGTGC	26
piR-hsa-11810	TGATCAGATTATGCGACGGTATGGGAC	27
piR-hsa-11817	TGATCAGTAGTGGGATCGCGCCTGTGAAT	29
piR-hsa-11862	TGATCGAATGGGAGAACAGTGCTGTG	26
piR-hsa-11883	TGATCTCTCCAACCGACCAGCAGGTCC	27
piR-hsa-11890	TGATCTGGCAGCTGTTCGGAGATGTGCCT	29
piR-hsa-11912	TGATGAATCAGGTGTTGCAGCGCTCC	26
piR-hsa-11919	TGATGAATGTCTGCGAAAGTATGGGA	26
piR-hsa-11952	TGATGAGAAGGTGGACTACGTTCAGGT	27
piR-hsa-11976	TGATGAGGTGACAAAGAGATTCTCAGC	27
piR-hsa-12042	TGATGCCTAAGAAGAACCGGATTGCC	26
piR-hsa-12112	TGATGGGCAAGGTGTTCTTTGGGCAACTGT	30
piR-hsa-12126	TGATGGTTGTGTCTGATGTGGCTGACATGT	30
piR-hsa-12133	TGATGTCAAGACTACCGATGGTTACT	26
piR-hsa-12152	CAAGACTTAGAGATGGAAAGTAGTTCAAT	29
piR-hsa-12153	CAAGACTTAGAGATGGAAAGTAGTTCAATG	30
piR-hsa-12173	CAAGGAAGGAAACAGAACGATGGGAA	26
piR-hsa-12183	CAAGTGCAGCGTCTGCCCAGACTACGACTTGT	32
piR-hsa-12206	CACAAAGATGAGTGGTGAAAATCTGATC	28
piR-hsa-12221	CACACACCCAGAGCATCTCGGAGTTCAGAC	30
piR-hsa-12275	CACATGCAAGCATCCCCGTTCCAGTGA	27
piR-hsa-12423	CAGAAGATTGAGGGTTCGTGTCCCTTCGTGGT	32
piR-hsa-12441	CAGACACCGTGGAGATGGACATTTACTGACT	31
piR-hsa-12442	CAGACAGAAGGATGTAAAGGATGGAA	26
piR-hsa-12446	CAGACATGGGCAAATGGAAGCGTTCTC	27
piR-hsa-12454	CAGACCCCAGAAAAGGTGTTGGTTGAT	27
piR-hsa-12471	CAGAGGAAAAGCAGCTTGGTTTGCGGC	27
piR-hsa-12485	CAGAGTCGCGCAGCGGAAGCGTGCTGGGCCC	31
piR-hsa-12487	CAGAGTGTAGCTTAACACAAAGCACCCAACT	31
piR-hsa-12488	CAGAGTGTAGCTTAACACAAAGCACCCAACTG	32
piR-hsa-12492	CAGATCAGGATTGCTGAAGGAGAGCTGAGT	30
piR-hsa-12511	CAGCAATTTCCCAGGTACCATGTAAGC	27
piR-hsa-12525	CAGCAGTTGAACATGGGTCAGTCGGTCC	28
piR-hsa-12609	CAGGAGACAGAAGACACACTACAGAATCTGGA	32
piR-hsa-12617	CAGGAGCTGGTGTGTACTGGAGACAC	26
piR-hsa-12632	CAGGATTGGAGGTGCTCTCTGGAGTGTCA	29
piR-hsa-12656	CAGGGACTTCCTGAGGAAAACGAGCACGTT	30
piR-hsa-12682	CAGGTTAGTTTTACCCTACTGATGATGT	28
piR-hsa-12719	CAGTTGAACATGGGTCAGTCGGTCCT	26
piR-hsa-12759	CATGATACTGTAAACGCTTTCTGATG	26
piR-hsa-12789	CATTGATCATCGACACTTCGAACGCACTTG	30
piR-hsa-12790	CATTGGTGGTTCAGTGGTAGAATTCTCGC	29
piR-hsa-12817	CCAAGACTTAGAGATGGAAAGTAGTTCA	28
piR-hsa-12818	CCAAGACTTAGAGATGGAAAGTAGTTCAA	29
piR-hsa-12819	CCAAGACTTAGAGATGGAAAGTAGTTCAAT	30
piR-hsa-12820	CCAAGACTTAGAGATGGAAAGTAGTTCAATG	31
piR-hsa-12835	CCAAGGCGTGCTACCTGAGCTGACAGC	27
piR-hsa-12904	TGCAGATCCTGGTGGTGGGAGAACCTAGA	29
piR-hsa-12938	TGCCAACATATAGGGCCCAAGGAACC	26
piR-hsa-12985	CCACCTCGATGGACAGAAGATCGGAA	26
piR-hsa-13037	CCAGCGTGTTTTGTGCTTGAACTTGGTGGA	30
piR-hsa-13073	CCATCGGTGTGCCTGCTCCTTCCAGCC	27
piR-hsa-13110	CCCAACGTCAGGGCGCGATGGAGTGAAGC	29
piR-hsa-13150	CCCACCCAGGGACGCGTGGTGACTTT	26
piR-hsa-13163	CCCACTGACCAGACCACAATGTTCAGGTCCC	31
piR-hsa-13246	TGATGTGGAACACGTGCTCATCGATGT	27
piR-hsa-13252	TGATGTGTCTTGGAGTTGCTCTTCTC	26
piR-hsa-13257	TGATGTGTTTTAAATGAAGGTGTGCTC	27
piR-hsa-13287	TGATTAAGGAAGTTATGGTACATCTGA	27
piR-hsa-13318	TGATTGAGGATACTGAAGACTGGCGT	26
piR-hsa-13348	TGATTGGTGTTGGGAAAGGACCTGGAAGT	29
piR-hsa-13349	TGATTGGTGTTGGGAAAGGACCTGGAAGTGA	31
piR-hsa-13374	TGATTTGATGAAGGTCCTGAACGAGC	26
piR-hsa-13582	TGCAAGTACATCTACGCCAAGGACCGC	27
piR-hsa-13597	TGCAAGTTGATGTCAAGATGGCCATCCTGCA	31
piR-hsa-13610	TGCAATCACCGTTCACTAGACTCGAC	26
piR-hsa-13633	TGCAATGGATGGTCGTGCGGAACTGC	26
piR-hsa-13634	TGCAATGGCATGATCTCGGCTCACTGC	27
piR-hsa-13643	TGCAATGTCTGGACGTGGTAAGCAAGG	27
piR-hsa-13775	TGCACTCGCGTGGGAACGAGAAGACACT	28
piR-hsa-13893	TGCAGAGTGGCGCAGCGGAAGCGTGCTGG	29
piR-hsa-13940	TGCAGCCGTGTCAAATTCAGTACCTGTCCT	30
piR-hsa-14014	TGCAGGATGCCGAGAAGGTGGTGGAGC	27
piR-hsa-14058	TGCAGGTGTCAACTCTGAAATGGTCAAGC	29
piR-hsa-14102	TGCAGTGCTCAGCATTACGTAAGAATGGC	29
piR-hsa-14114	TGCAGTGGTGTCGTGGGTGTTACGTGC	27
piR-hsa-14235	TGCATGGTCATAGGCCTGATCTTCCTGC	28
piR-hsa-14366	TGCCAAGAACATGATGGCTGCCTGTGACCC	30
piR-hsa-14399	TGCCAAGTATCTTTACTGTCATTCTGACC	29
piR-hsa-14419	TGCCAATGATGGTTAAGAATTTCTTCACCTGA	32
piR-hsa-14513	TGCCACGTATCGGCGAAGGTTGGGAC	26
piR-hsa-14522	TGCCACTCACCAGTCTGACACGTGTGCCC	29
piR-hsa-14608	TGCCAGGAAGAAATAGGACGTGACGGT	27
piR-hsa-14647	TGCTATCTGAGAGATGGTGATGACATTA	28
piR-hsa-14708	TGCTGTCCTTGGCTACAGAAGTGCCCTGAGC	31
piR-hsa-14751	TGCCAGTATTAAGGAACAGTGCTACTCTGGA	31
piR-hsa-14870	TGCCATGGTAATCCTGCTCAGTACGAGA	28
piR-hsa-14894	TGCCATTAGGAAGTGTGTAAGGGTCC	26
piR-hsa-14934	TGCCCAACTTCTGTCTACTGTCGGACTC	28
piR-hsa-14935	TGCCCAACTTCTGTCTACTGTCGGACTCTA	30
piR-hsa-14960	TGCCCAGAAAGCAGTTAACAGTGCCAC	27
piR-hsa-14962	TGCCCAGAAGATTGTTGCCACAAGGAAG	28
piR-hsa-15016	TGCCCCATCTTGTCTGCCGGCAGCATGC	28
piR-hsa-15022	TGCCCCCATGTCTAACAACATGGCTTTCT	29
piR-hsa-15023	TGCCCCCATGTCTAACAACATGGCTTTCTCA	31
piR-hsa-15060	TGCCCTACATGAGGTACAGCAGAAAG	26
piR-hsa-15111	TGCCCTTTTAATGCTTGCTCTCTTTCTGTCT	31
piR-hsa-15140	TGCCGATACTCAGACTGCAGCTGGACC	27
piR-hsa-15142	TGCCGATGCTGTGCAGGCTGCAGAGCGCGC	30
piR-hsa-15215	TGCCTAGTGGGCCACTTTTGGTAAGCAGAA	30
piR-hsa-15222	TGCCTATGAACACACACAGATGAAACTT	28
piR-hsa-15293	TGCCTCTCAACAACCTCTTTGGACTCAGT	29
piR-hsa-15294	TGCCTCTCAACAACCTCTTTGGACTCAGTGC	31
piR-hsa-15327	TGCCTGACAGAAGCTTTGGTGGATCA	26
piR-hsa-15374	TGCCTGCCTTCCGTCGTTTTGATCCTTGA	29
piR-hsa-15384	TGCCTGGACCCAGAGAGTGTGGGACTCCCCGC	32
piR-hsa-15388	TGCCTGGAGTTACGGGATTGTGATGT	26
piR-hsa-15399	TGCCTGGGTCTTGGATAAACTGAAAGC	27
piR-hsa-15404	TGCCTGTAATCCCAGCACTTTGGGAGGCC	29
piR-hsa-15405	TGCCTGTAATCCCAGCACTTTGGGAGGCCG	30
piR-hsa-15406	TGCCTGTAATCCCAGCTACTCAGGAGGCTG	30
piR-hsa-15419	TGCCTGTCGCTTGTCTTCTATTCACCA	27
piR-hsa-15445	TGCCTTACTTTGTACGACGCTCTCGGATGC	30
piR-hsa-15449	TGCCTTCAACATGTCCGAGACTGCGC	26
piR-hsa-15450	TGCCTTCAACATGTCCGAGACTGCGCC	27
piR-hsa-15505	TGCCTTTCTGTAGGCTGGTGTTGTTGCC	28
piR-hsa-15506	TGCCTTTCTGTAGGCTGGTGTTGTTGCCTC	30
piR-hsa-15507	TGCCTTTCTGTTGTAATTGATGCCAATAA	29
piR-hsa-15508	TGCCTTTCTGTTGTAATTGATGCCAATAAC	30
piR-hsa-15509	TGCCTTTCTGTTGTAATTGATGCCAATAGC	30
piR-hsa-15572	TGCGAGTACTCAACACCAACATCGATG	27
piR-hsa-15603	TGCGCATGAATGAATGAACGACGGTGTT	28
piR-hsa-15610	TGCGCCATGAGAGCCAAGTGGAGGAAGA	28
piR-hsa-15613	TGCGCGACATCAAGGAGAAGCTGTGC	26
piR-hsa-15614	TGCGCGACATCAAGGAGAAGCTGTGCTA	28
piR-hsa-15615	TGCGCGACATCAAGGAGAAGCTGTGCTACGT	31
piR-hsa-15622	TGCGCTGTGTAACACAGATTCTCCTCTGCGC	31
piR-hsa-15640	TGCGGAGTTGCTCTCTCCGGGCTCAGTGGA	30
piR-hsa-15691	TGCGTGCAGCGTGGAGATTGTGGTCCCCA	29
piR-hsa-15693	TGCGTGCTGAGGTGCAGAAACTGCAGATG	29
piR-hsa-15859	TGCTAGAGGAAGCCAAAGCCAAGGAC	26
piR-hsa-15864	TGCTAGCCTCACGAAACTGGAATAAGCCTT	30
piR-hsa-15922	TGCTATTGTATTTTGGCTTGGTGTGT	26
piR-hsa-15934	TGCTCAACGACGAGGACCTGACGCAG	26
piR-hsa-16119	TGCTGAAGTTTGCTGCTGCCACTGGAGCC	29
piR-hsa-16127	TGCTGACAACTGCCTCCGAGAACTCAGC	28
piR-hsa-16131	TGCTGACAGAACTGCTGGATTTGGTTC	27
piR-hsa-16132	TGCTGACAGAAGCCTGTCCTTGTAAGGCC	29
piR-hsa-16214	TGCTGCAGCTCTACTCTGGACACCTGC	27
piR-hsa-16258	TGCTGCTGCCAAAGCGTTGAGGATCC	26
piR-hsa-16348	TGCTGGTGTTGGTGAATTTGAAGCTGGTATC	31
piR-hsa-16350	TGCTGGTTCTCTGCTCTTGAAGATGG	26
piR-hsa-16358	TGCTGTAAGTGCTCGCAACATTATGC	26
piR-hsa-16386	TGCTGTGCTGTTGCCTCTAGGTGACT	26
piR-hsa-16404	TGCTGTTCGTGATATGAGACAGACAGTTGC	30
piR-hsa-16476	TGCTTGAGAACAGCCTCTGCAGGCCCTGC	29
piR-hsa-16524	TGCTTTACATTTGGTGTACTTTCGGGCGT	29
piR-hsa-16534	TGCTTTGAGGTACACCGGGCTGTCAAGTGT	30
piR-hsa-16585	TGGAAAAGGTTGAGAGGAGACCCCTGTTT	29
piR-hsa-16620	TGGAAGGTGATCCTGACGTTCTTTGTGGGT	30
piR-hsa-16730	TGGAAAGAGCTTTAGGACAGCTTAGATGC	29
piR-hsa-16791	TGGAAATAGAGTTACAACCAGAGCAGC	27
piR-hsa-16800	TGGAAATGAGATCTTGTGCCATAAATA	27
piR-hsa-16836	TGGAACATGGGATGCCCTCTTACTGC	26
piR-hsa-16848	TGGAACGCCAAGAGGAGTCTCTGTCC	26
piR-hsa-16860	TGGAACTGACAGTGATGGGAATGTGGCAA	29
piR-hsa-16865	TGGAACTGGAGACCTGGGGAGGAGCC	26
piR-hsa-16886	TGGAAGACGGTGAAATTGATGGAAATA	27
piR-hsa-16893	TGGAAGAGGCTTGTAACCTGAACTTC	26
piR-hsa-16916	TGGAAGCAGCTTTGTAACTAGGTAATGGGT	30
piR-hsa-16928	TGGAAGCTAGGAACATGGACAAGGAGCCT	29
piR-hsa-16962	TGGAAGTGACTGGTCTGATGTTGAGG	26
piR-hsa-16963	TGGAAGTGACTGGTCTGATGTTGAGGAGA	29
piR-hsa-16964	TGGAAGTGAGAGAGACAATGTCACACTTCA	30
piR-hsa-16975	TGGAAGTGGATTTCCGGTGAAGGATGG	27
piR-hsa-17047	TGGAATGGTGACAACATGCTGGAGCC	26
piR-hsa-17083	TGGACAAGATGGACCAAGATTTGAAGATCA	30
piR-hsa-17104	TGGACACCAGCCGTGTGCAGCCTATCAAG	29
piR-hsa-17138	TGGACAGGTGTCCGCGTGGGTTCGAGCCCC	30
piR-hsa-17151	TGGACATGATGGATCCACGGATGTACAGC	29
piR-hsa-17162	TGGACCAAGAGTGTGAAGATCAGGAG	26
piR-hsa-17202	TGGACCTTTTGCCATGTCTGGGCGTGGTA	29
piR-hsa-17204	TGGACGACGTGGACAGCAGCGTGTGC	26
piR-hsa-17215	TGGACGGACCGAATCCCTGGATGTTCAGGAG	31
piR-hsa-17220	TGGACGTGCTTAGGAACAGGGTGCTG	26
piR-hsa-17221	TGGACGTGCTTAGGAACAGGGTGCTGGT	28
piR-hsa-17222	TGGACGTGCTTAGGAACAGGGTGCTGGTT	29
piR-hsa-17288	TGGAGAACTACCGTGTGTCCTTGGCTG	27
piR-hsa-17292	TGGAGAAGAGATCCTGATCACGGTGCTGTC	30
piR-hsa-17294	TGGAGAAGCTAGAGCAGGACTTCGTCTC	28
piR-hsa-17312	TGGAGACGTTCTTGGTGAAAGCTGTGGTC	29
piR-hsa-17314	TGGAGACTGTGTGCATCTACGGCTACTCCT	30
piR-hsa-17323	TGGAGAGCTGCCACAACCAGAACATTC	27
piR-hsa-17337	TGGAGATGTACAAAGAGTTCGCTGAGC	27
piR-hsa-17344	TGGAGCACAATGTCACCCACACCTACGCTGC	31
piR-hsa-17366	TGGAGCCATGGTGAACTACATCAAGA	26
piR-hsa-17367	TGGAGCCCAGACACTTTGTGGATGAGAAGGC	31
piR-hsa-17379	TGGAGCTAAACCAAAGTTGATATGTGA	27
piR-hsa-17410	TGGAGGAAGACGTGGCTACCCTACTT	26
piR-hsa-17444	TGGAGGTGATGAACTGTCTGAGCCTGACC	29
piR-hsa-17461	TGGAGTACATCGTCCTCAACGTGGGC	26
piR-hsa-17491	TGGAGTTCACCGAGGCCGAGAGCAAC	26
piR-hsa-17518	TGGATAACTGTGCTCTGTTGGACTCA	26
piR-hsa-17520	TGGATAAGGCGTCTGATTCCGGATCAGAA	29
piR-hsa-17560	TGGATATGATGACTGATTACCTGAGA	26
piR-hsa-17600	TGGATGACAAGGAGCCGAAGAGGTGGC	27
piR-hsa-17612	TGGATGACTGCAAGACAGGTAGATCTC	27
piR-hsa-17660	TGGATGTGCATGCCCTGTGGACGAAGGTA	29
piR-hsa-17674	TGGATTAAGGGCGGTACAAGATGTGCTTT	29
piR-hsa-17692	TGGATTCTTTGCGAGAAATAACGAAGAGTA	30
piR-hsa-17793	TGGCAAGTCCACGCTGACAGACTCCCT	27
piR-hsa-17804	TGGCAATGATGACCCACTTGCCCTCACTGA	30
piR-hsa-17805	TGGCAATGATGACTATATGTATTCCTGC	28
piR-hsa-17842	TGGCACAGGTCACTTGCACATAGGTCTCGGA	31
piR-hsa-17888	TGGCAGACATTGTAAAAGACCCTGTGT	27
piR-hsa-17895	TGGCAGAGACTTGGGGATGGAACCGC	26
piR-hsa-17954	TGGCAGTGTGTTTTGGTGATGTTGGA	26
piR-hsa-17967	TGGCATACTACACAGATCACTCTGGGC	27
piR-hsa-17968	TGGCATACTACACAGATCACTCTGGGCTC	29
piR-hsa-17969	TGGCATATGTCAGGAAGTCCAGAAAGGGTGT	31
piR-hsa-17987	TGGCATCCTACTACGAGATCCTAGACGTGC	30
piR-hsa-17990	TGGCATCTCATCCAAGGCCATGGGCATC	28
piR-hsa-18052	TGGCCAAACGTACCAAGAAAGTCGGGAT	28
piR-hsa-18063	TGGCCAACTATCGGAACACGAGCGAGAT	28
piR-hsa-18159	TGGCCCGAACCAAGCAGACTGCGCGCAA	28
piR-hsa-18166	TGGCCCTGATCGTGGAGTGAGTCCTA	26
piR-hsa-18172	TGGCCGACACCATGACCAGCGTGGGGAC	28
piR-hsa-18179	TGGCCGCCATGAGGAAAGCTGCTGCC	26
piR-hsa-18212	TGGCCTCCCAACAACGTCTTTGGACTCAGC	30
piR-hsa-18254	TGGCCTTGATGGTGTAGTGCATGGAC	26
piR-hsa-18275	TGGCGAAATTAGAGGAGTGCGTCAGA	26
piR-hsa-18285	TGGCGATGAGGAGGTACCTATTGTGTTGA	29
piR-hsa-18286	TGGCGATGAGGAGGTACCTATTGTGTTGAGT	31
piR-hsa-18287	TGGCGATGAGGAGGTACCTATTGTGTTGAGTA	32
piR-hsa-18339	TGGCTACTTCATCAACAATAAACAGGA	27
piR-hsa-18348	TGGCTATGATCTGCCTTGTTCAAGCTGAGA	30
piR-hsa-18357	TGGCTCACGAAGTGTGCAGACGACTC	26
piR-hsa-18378	TGGCTCTTCATAATTCTAAGACTAATGC	28
piR-hsa-18518	TGGGAAACTGTTTCTGCCTTGATGAT	26
piR-hsa-18645	TGGGGTGTATGAAGGCTTTTGGTCTC	26
piR-hsa-18674	TGGTGAATGACATCTAGACCCTTCTGTCC	29
piR-hsa-18698	TGGTGACCAAATCCAGAAGACTGACCTGAGC	31
piR-hsa-18709	TGGTGGTTCAGTGGTAGAATTCTCGCCTG	29
piR-hsa-18805	TGGGAAGAGGACTTTGCTGCTGAAGTGTT	29
piR-hsa-18837	TGGGAAGTACGTCCTGGGGTACAAGCA	27
piR-hsa-18860	TGGGAAGTGATGACACCTGTGACTGTTGAA	30
piR-hsa-18882	TGGGAATACAACAACGTGGGCACTGA	26
piR-hsa-18905	TGGGAATGCAGCCCAAAGCGGGTGGTA	27
piR-hsa-18973	TGGGACTGTGCGCTGGACTTGGAGCC	26
piR-hsa-18974	TGGGACTGTGCGCTGGACTTGGAGCCC	27
piR-hsa-19013	TGGGAGAGTGTTGTGTTGCTGTTTAC	26
piR-hsa-19061	TGGGAGGAGCTGTTGAAAGAGGATCTGGTC	30
piR-hsa-19128	TGGGATACGGTGATTGCTAGTTGTGACTGA	30
piR-hsa-19129	TGGGATACGGTGATTGCTAGTTGTGATT	28
piR-hsa-19192	TGGGATGTGAGGAGCCCCTCTGCCTGGCTGC	31
piR-hsa-19254	TGGGCACAGAAGTTAGGAAGGGCTGTCAC	29
piR-hsa-19255	TGGGCACAGAAGTTAGGAAGGGCTGTCT	28
piR-hsa-19357	TGGGCCATGCTTGTGAAGTGATGTGTGTC	29
piR-hsa-19431	TGGGCTCTGCAGATGGACCTCTCTCC	26
piR-hsa-19468	TGGGCTTAGCGGAGATGGAGCAGCCTGGTC	30
piR-hsa-19470	TGGGCTTAGCTGGACTTAGATCTTCGGTGGC	31
piR-hsa-19546	TGGGGAGCGCCTCGTCGACATGAGTGA	27
piR-hsa-19562	TGGGGATGACGGACTGTAGTTGATGGGTTA	30
piR-hsa-19679	TGGGTACCTGGCCCCACAGATGATCGC	27
piR-hsa-19707	TGGGTATGACCTGAAATGTTTGGCAATGA	29
piR-hsa-19746	TGGGTCCTCTTCCACTTCTTGACTGTGCAGT	31
piR-hsa-19803	TGGGTGCACGTGTTAATCGGAAAAGTGGTC	30
piR-hsa-19891	TGGGTGTCTTAGGATGATGGTTAGGAAC	28
piR-hsa-19933	TGGGTTCNCCAGCGACAAGGCTAAGGCGG	29
piR-hsa-19969	TGGGTTTCATGGCTGTGGATATGGGACT	28
piR-hsa-19970	TGGGTTTCATGGCTGTGGATATGGGACTGT	30
piR-hsa-19996	TGGTAAAGGTGGAAAAGGTTTGGGTAA	27
piR-hsa-20029	TGGTACACAAGTCACTGGCCTGGAACTC	28
piR-hsa-20070	TGGTAGACAATGAGGCCATCTATGAC	26
piR-hsa-20081	TGGTAGATGGAAAACCGGTGAATCTG	26
piR-hsa-20230	TGGTCATTGACAATGGCTCCGGCATGTGC	29
piR-hsa-20248	TGGTCCGTATCCCATTCTATCTCAGATGC	29
piR-hsa-20266	TGGTCGTGGTTGTAGTCCGTGCGAGAA	27
piR-hsa-20313	TGGTCTTGAACTCCTGGCCTCGGGTGATAT	30
piR-hsa-20358	TGGTGAAGCTCATGAAGATTATGGGA	26
piR-hsa-20384	TGGTGACTTGTTCTGGTGTCTGAGTGGC	28
piR-hsa-20405	TGGTGAGCTGCGACAACTGGATGAAC	26
piR-hsa-20429	TGGTGAGTTCTCGTGATGGTTTTGGA	26
piR-hsa-20540	TGGTGGACAAGATGGACCAAGATTTGA	27
piR-hsa-20547	TGGTGGAGAACAACGAACGGGTGTTT	26
piR-hsa-20572	TGGTGGCGCATGCCTGTAATCCCAGCTACTC	31
piR-hsa-20605	TGGTGTACATCATCGACTTCGGGCTGGCA	29
piR-hsa-20609	TGGTGTAGCTCAAGATGGAACCACGAT	27
piR-hsa-20610	TGGTGTAGCTCAAGATGGAACCACGATT	28
piR-hsa-20611	TGGTGTAGCTGCCTCACATGAGGTTATTGCT	31
piR-hsa-20613	TGGTGTATGTGCTTGGCTGAGGAGCCAATGG	31
piR-hsa-20616	TGGTGTATTAGTTTATACTACAAGGA	26
piR-hsa-20631	TGGTGTCCAGAAGATGTGAGCTTAACCTC	29
piR-hsa-20641	TGGTGTCTCACTGTGGCATCCTCAGGCGA	29
piR-hsa-20661	TGGTGTGACCCTGTTGGAAAACTGGCA	27
piR-hsa-20701	TGGTGTTCTCAAACCCGGTATGGTGGTC	28
piR-hsa-20739	TGGTTAGTCTTGAGGATCCAGATGTGATTC	30
piR-hsa-20754	TGGTTCAGCCAAGAGGATCTGTGGAA	26
piR-hsa-20757	TGGTTCAGTGGTAGAATTCTCGCCTCC	27
piR-hsa-20774	TGGTTCTGCAATATCTCTGAGGTGCA	26
piR-hsa-20785	TGGTTGAGCTCGCAAACCTGAAAACTACTGT	31
piR-hsa-20809	TGGTTGTGTCTGTGCCGACTCGGTGT	26
piR-hsa-20851	TGTAAAAGACGTGAACCAGCAGGAGT	26
piR-hsa-20934	TGTTGTGGCTGCCGCGGGGAGATGGCT	27
piR-hsa-21045	TGTACCAGAGGTGCTGTAGGCTTGCAGGA	29
piR-hsa-21046	TGTACCAGAGGTGCTGTAGGCTTGCAGGAA	30
piR-hsa-21077	TGTACTCGCGTCGGAACCTGCAGACACTT	29
piR-hsa-21094	TGTAGAGATAAAGCTGAGGAGGAGGC	26
piR-hsa-21126	TGTAGTCGTGGCCGAGTGGTTAAGGC	26
piR-hsa-21131	TGTAGTGCGCTATGCCGATCGGGTGTCC	28
piR-hsa-21166	TGTATTCCTGAACTGGAGCCCCAGAC	26
piR-hsa-21196	TGTCAAGTTGGTGGAGGCCCTTTGTGCTT	29
piR-hsa-21212	TGTCACCACTGTCACCATTTCAACGTCCC	29
piR-hsa-21217	TGTCACGTGTGTGGCAAGATGCTGAGCTC	29
piR-hsa-21286	TGTCATGCGGCCGGAGCAGATCATGAAGTCCA	32
piR-hsa-21353	TGTCCATGATGTTCCGCAACTACCTACA	28
piR-hsa-21357	TGTCCCAGACACTGAGCCTGGTGCCCCGGC	30
piR-hsa-21450	TGTCTAGCTCAGGGTTTGTGAATGCACC	28
piR-hsa-21479	TGTCTGATTCCTCTCTTTGTCCTCTGA	27
piR-hsa-21508	TGTCTGTGTGGAAAGCGGCTGTGCAGACA	29
piR-hsa-21509	TGTCTGTGTGGAAAGCGGCTGTGCAGACAT	30
piR-hsa-21515	TGTCTTAGAAACCCGTCCCTGAGGCTTGGC	30
piR-hsa-21528	TGTCTTTGGGTAGGGAGCCTGTGTGTA	27
piR-hsa-21564	TGTGAACCTGTTTGATTTGCCTTAAGCCT	29
piR-hsa-21592	TGTGAAGCCATTCGGCCTGAAGGTGTC	27
piR-hsa-21601	TGTGAAGCTCACTGTGAGCAATGTGCTGA	29
piR-hsa-21622	TGTGAATCTGACAACAGAGGCTTACGACCCC	31
piR-hsa-21632	TGTGAATGGAAACGTGGCTCATTTGC	26
piR-hsa-21673	TGTGACCTCTGTCGAAGATTATAAAGCC	28
piR-hsa-21687	TGTGACGTGGTCAGCCTCATTCATCCT	27
piR-hsa-21688	TGTGACGTTTCTGAGTGTAGTGTGGTA	27
piR-hsa-21707	TGTGACTTCCTGGAGACTCACTTCCTAGT	29
piR-hsa-21746	TGTGAGGATGAACAGGATGACTGTCTGCC	29
piR-hsa-21747	TGTGAGGATGAACAGGATGACTGTCTGCCTA	31
piR-hsa-21791	TGTGATACGATCCTGACCAACCGCTC	26
piR-hsa-21823	TGTGATGATGAGGCGGGCAGTTAACGCGA	29
piR-hsa-21834	TGTGATGCTGAGTGCCAGAAATACTC	26
piR-hsa-21835	TGTGATGCTGAGTGCCAGAAATACTCT	27
piR-hsa-21836	TGTGATGCTGAGTGCCAGAAATACTCTG	28
piR-hsa-21883	TGTGCAAGTGGATGTCAAGATGGCCA	26
piR-hsa-21996	TGTGCTCAACCTCTTCACCAGGATCCGGTA	30
piR-hsa-22012	TGTGCTGACCATGGGCCCTGAGCGTCCT	28
piR-hsa-22021	TGTGCTGCCTGGAGGAGAAGCCTGGA	26
piR-hsa-22033	TGTGCTGTGATCAAATGAAGGTTGGACTGA	30
piR-hsa-22041	TGTGCTTCCTGGGTAACGCAATGCCCCACA	30
piR-hsa-22060	TGTGGAACCCGTGGTCATGATGCACATGA	29
piR-hsa-22120	TGTGGCCGGAGAACAGCAGCTGGATGT	27
piR-hsa-22136	TGTGGCTGTGTCTAGTACAACTTTTA	26
piR-hsa-22148	TGTGGGCAAAGTAAACTGAAAACCTTC	27
piR-hsa-22201	TGTGGTGAGCTAGCATGTCTTTGATATTA	29
piR-hsa-22243	TGTGTATGTACAGAAGGGCTACCAGGA	27
piR-hsa-22245	TGTGTATTCGGACTTCCTGCTCTACA	26
piR-hsa-22276	TGTGTGAATGTGCTTTGACTTTGGTC	26
piR-hsa-22277	TGTGTGAATGTGCTTTGACTTTGGTCT	27
piR-hsa-22296	TGTGTGCTAAATGTGTTCGTGACAGG	26
piR-hsa-22302	TGTGTGCTTACCTGTAGCTTAGCTCCC	27
piR-hsa-22351	TGTGTGTTGATGGATGGAAACTCGGCA	27
piR-hsa-22358	TGTGTGTTTGCGTGCGCATGTGTAGAGGA	29
piR-hsa-22381	TGTTAACCGAAAGGTTGGTGGTTCGAGC	28
piR-hsa-22382	TGTTAACCGAAAGGTTGGTGGTTCGAGCC	29
piR-hsa-22384	TGTTAACCTACCTACCATTGCGCTGTGTAA	30
piR-hsa-22437	TGTTCACTTCCCTGCCATTCAGTATGC	27
piR-hsa-22464	TGTTCCCTTGGGCCTGACTCGACTGG	26
piR-hsa-22502	TGTTGAACAAACAGGTGCTCCAGGCTT	27
piR-hsa-22567	TGTTGGACTTCAAGGACAAGGTGGAC	26
piR-hsa-22586	TGTTGGGAACTGTCGACAAACACTCAGT	28
piR-hsa-22612	TGTTTATTTAAGAAGTCGGGCCTATGC	27
piR-hsa-22643	TGTTTGGCTGCTGCAAGAGACCTGATAGGCCT	32
piR-hsa-22691	TNCATCATGGACCAAAGGACAGACAGGCTG	30
piR-hsa-22692	TNCATCATGGACCAAAGGACAGACAGGCTGC	31
piR-hsa-22708	TNCCATGTCTGGACGTGGCAAGCAGGGC	28
piR-hsa-22829	TNGGACTAACTATGGAACTATGAAGATGA	29
piR-hsa-22842	TNGGCAGTGTATTGCTAGCGGCTGTTAA	28
piR-hsa-22891	CCTGCTGTGAACTTGCACTTGGAGCCCTGA	30
piR-hsa-22915	CTGTGGAGAAGAGATCCTGATCACGGTGCT	30
piR-hsa-22916	CTGTGGATTTCCTGTGAACTGGTTGTT	27
piR-hsa-23087	TTAAGGGGAACGTGTGGGCTATTTAGGCTA	30
piR-hsa-23103	TTAATGCCTAGAGGGTGGTGGATAGTGAA	29
piR-hsa-23109	TTACAACCACCACAACCGAAATCTAGGGC	29
piR-hsa-23160	TTACGGCTAAAAAGTTCTTCTGTCTGA	27
piR-hsa-23209	CCCCCCACTGCTAAATTTGACTGGCTA	27
piR-hsa-23210	CCCCCCACTGCTAAATTTGACTGGTT	26
piR-hsa-23216	CCCCCTTTTAAAAGCACTCAATGGGCC	27
piR-hsa-23230	CCCCTGGTCGTCTAGTGGTTAGGATTCGGC	30
piR-hsa-23231	CCCCTGGTGGTCTAGTGGTTAGGATTCGGC	30
piR-hsa-23248	CCCGGCCCGGACACGGACAGGATTGACAGATT	32
piR-hsa-23289	CCCTGGTAGTCTAGTGGTTAGGATTCGG	28
piR-hsa-23293	CCCTGTGATGAGTTGCCATGCTAATACGGA	30
piR-hsa-23296	CCCTTCGTGTTTTGNGACCCTCCCTTTTAGG	31
piR-hsa-23317	CCGCCTGGGAATACCGGGTGCTGTAGGCTTA	31
piR-hsa-23326	CCGGCCCGGACACGGACAGGATTGACAGAT	30
piR-hsa-23327	CCGGCTAGCTCAGTCGGTAGAGCATGAGA	29
piR-hsa-23330	CCGTAGTGTAGTGGTTATCACGTTCGCC	28
piR-hsa-23331	CCGTGACTGTGGAGTGACGCCTCCTGTGCAG	31
piR-hsa-23358	CCTATGACCGGAGGTATTGGTGTGATGCA	29
piR-hsa-23457	CCTTGAGGTATTGAGCTGGGCTGGAC	26
piR-hsa-23544	CGCAGTATGATCGAACTTGTGAGTGGAC	28
piR-hsa-23555	CGCCATCTTCAGCAAACCCTGATGAAGGCTA	31
piR-hsa-23566	CGCGGGTTCGATCCCCGTACGGGCCACC	28
piR-hsa-23574	CGCTGGTTCGATTCCGGCTCGAAGGAC	27
piR-hsa-23588	CGGAAGCGTGCTGGGCCCATAACCCAGA	28
piR-hsa-23617	CGGCGGTGGCGGCGGCGGCGGCGGGACC	28
piR-hsa-23619	CGGCTAGCTCAGTCGGTAGAGCATGAGACT	30
piR-hsa-23621	CGGCTGTTAACCGAAAGGTTGGTGGT	26
piR-hsa-23637	CGGGAGGCCCGGGTTCGGTTCCCGGCCAATGC	32
piR-hsa-23638	CGGGAGGCCCGGGTTCGTTTCCCGGCCAATG	31
piR-hsa-23652	CGGGTGGAACAAGCACGGTTGTGTGT	26
piR-hsa-23655	CGTAGTGTAGTGGTCATCACGTTCGCCT	28
piR-hsa-23656	CGTAGTGTAGTGGTTATCACGTTCGCC	27
piR-hsa-23662	CGTCCATGATGTTCCGCAACTACCTAC	27
piR-hsa-23663	CGTCCATGATGTTCCGCAACTACCTACA	28
piR-hsa-23664	CGTCCGTGAAGATGGTGGTCTTGTGGCGC	29
piR-hsa-23670	CGTGAGTTCGAGCCTCACACGGGGCAC	27
piR-hsa-23671	CGTGAGTTCGATCCTCACACGGGGCA	26
piR-hsa-23672	CGTGAGTTCGATCCTCACACGGGGCACCA	29
piR-hsa-23679	CGTGCTGGGCCCATAACCCAGAGGTCGATGGA	32
piR-hsa-23786	CTCACAAAGATGAGTGGTGAAAATCTGATC	30
piR-hsa-23817	CTCAGGTGAAGGAACTTAGCATGGTAAC	28
piR-hsa-23821	CTCAGTGATGCAATCTCTGTGTGGTTCTGAAA	32
piR-hsa-23822	CTCAGTGATGCAATCTCTGTGTGGTTCTGAGA	32
piR-hsa-23884	CTCTACTGAACTGCCATGAGGAAACTGCC	29
piR-hsa-23919	CTGAACTCCTCACACCCAATTGGACCA	27
piR-hsa-23974	CTGATGGAGCTCCTGATGACCTAATG	26
piR-hsa-23981	CTGCAAAACAGAGGCTGATGGATCTGA	27
piR-hsa-23984	CTGCAATGATGAAAATGTAGCTACTGAGC	29
piR-hsa-23985	CTGCAATGATGTGACCACACTTGCCTGAGCAG	32
piR-hsa-23992	CTGCAGTGATGACTTTCTTAGGACACCTTTG	31
piR-hsa-24000	CTGCATCCACTGATAGACCTTGAACAAT	28
piR-hsa-24015	CTGCGATGATGGCATTTCTTAGGACACCTTTG	32
piR-hsa-24046	CTGGAATGCTTGAACCCCTTGGCAGCTC	28
piR-hsa-24052	CTGGACTAGCACGGGTAGATGGAGAA	26
piR-hsa-24085	CTGGGAATGCAGCCCAAAGCGGGTGGTAA	29
piR-hsa-24143	CTTAGGTCGCTGGTTCGATTCCGGCT	26
piR-hsa-24148	TTAGCAATGAATTGAGGCCTAGTAGC	26
piR-hsa-24176	TTAGTCTGCTGATGAAACCTTGTGCTTCCT	30
piR-hsa-24242	TTCAACAACTGGACTGGAGGCTCTTGGT	28
piR-hsa-24243	TTCAACAACTGGACTGGAGGCTCTTGGTT	29
piR-hsa-24248	TTCAACATGACAGATGCCGCTGTGTCC	27
piR-hsa-24251	TTCAACCAGGTTGTGTTGAAGAGGTTGTT	29
piR-hsa-24253	TTCAACGGCCGCGTGCTCTTCATCAA	26
piR-hsa-24300	TTCAATCTGGAAACATCAATGCTGCC	26
piR-hsa-24360	TTCACTGATGAGAGCATTGTTCTGAGC	27
piR-hsa-24451	TTCATAATGCCGATGTGACTCTACGTA	27
piR-hsa-24512	TTCCAAATCAAGATGGACTCGCAGGAGACTA	31
piR-hsa-24584	TTCCAGGATTCCTAGTGAAGCATGGA	26
piR-hsa-24592	TTCCAGGTTTGACTCTCCAGCACAGAGCAGA	31
piR-hsa-24652	TTCCCGCCACCTCAGGGTCACGCCCAGT	28
piR-hsa-24672	TTCCCTGGTGGTCTAGTGGTTAGGATTCGGC	31
piR-hsa-24683	TTCCGTAGTGTAGTGGTTATCACGTTCGCC	30
piR-hsa-24684	TTCCGTAGTGTAGTGGTTATCACGTTCGCCTC	32
piR-hsa-24685	TTCCGTTGATATCAAGAAAGTGCTGTT	27
piR-hsa-24775	TTCGATGAAGAGATGATGACGAGTCTGACT	30
piR-hsa-24942	GAAGGGAGTTCAGAGGACCTGCTGGA	26
piR-hsa-24975	TTCTCGGAGCTGCTGTCCAACCTGTACTCGC	31
piR-hsa-25013	TTCTGCAAGACCTAAGCTCTACCCTC	26
piR-hsa-25046	TTCTGGGTCGGGGTTTCGTACGTAGCA	27
piR-hsa-25097	TTCTTGGAGTGTGCTGTGAATGTGCTT	27
piR-hsa-25149	TTGAAGCTGCCTGGGCTCTAACGAAT	26
piR-hsa-25244	TTGAGGTTTGGGAACCTGTGCCTAGATT	28
piR-hsa-25258	TTGATAGTGTTTGACGTGGAATTTGGGC	28
piR-hsa-25262	TTGATCATGCATTGGACTGCAGAAAT	26
piR-hsa-25313	TTGCAAGCAACACTCTGTGGCAGATGATC	29
piR-hsa-25353	TTGCAGGGAAAACACTTCAGCATGGTGCAGT	31
piR-hsa-25369	TTGCATGATGGGCTTCTGCAGCTTCC	26
piR-hsa-25379	TTGCCAATGGGATATGGGATGCTGGT	26
piR-hsa-25393	TTGCCAGTGGAATGGAATTGTGACCT	26
piR-hsa-25401	TTGCCATTGAAAACCCTGCTGATGTCA	27
piR-hsa-25447	TTGCTGTGATGACTATCTTAGGACACCTTTG	31
piR-hsa-25504	TTGGACACGTGTTGATGTGGATGGCACTC	29
piR-hsa-25533	TTGGAGCAAGAAGAGCAAGGAAGGCC	26
piR-hsa-25537	TTGGAGCCAGGAGCCTGCCATGAGGT	26
piR-hsa-25553	TTGGAGGATGAAACAAAGGAATCTGACT	28
piR-hsa-25568	TTGGAGTGTAGCTACTTTAACAGATGG	27
piR-hsa-25599	TTGGCAAAGAACTCCACAATCCAAGTGACC	30
piR-hsa-25635	TTGGCCCTTTATGGTGGTGAATGATGCT	28
piR-hsa-25652	TTGGCGATTTGTCTGATTCTGGTTTTGAGC	30
piR-hsa-25653	TTGGCGGTAGATGTTCATGGTGATCC	26
piR-hsa-25728	TTGGTCACAGGTGGCTTAGAAGTGTGTGT	29
piR-hsa-25764	TTGGTGCTGACTAGACGCTGACAACGCCGAA	31
piR-hsa-25779	TTGGTGGTTCAGTGGTAGAATTCTCGC	27
piR-hsa-25780	TTGGTGGTTCAGTGGTAGAATTCTCGCCT	29
piR-hsa-25781	TTGGTGGTTCAGTGGTAGAATTCTCGCCTG	30
piR-hsa-25782	TTGGTGGTTCAGTGGTAGAATTCTCGCCTGC	31
piR-hsa-25783	TTGGTGGTTCAGTGGTAGAATTCTCGCCTGCC	32
piR-hsa-25786	TTGGTGTATGTGCTTGGCTGAGGAGCC	27
piR-hsa-25876	TTGTCCTACATGGTGCGTGAGCTCCTCATC	30
piR-hsa-25880	TTGTCTCAGCCACCATGAGTGGTGTCACCACC	32
piR-hsa-25940	TTGTTGTGGGGCCACCCTGTGCATGGTAGA	30
piR-hsa-25958	TTTACACATCAATCTGCCTCACTGCTGTTC	30
piR-hsa-25980	TTTCAAGGTGACTGCATAGCTAAGAC	26
piR-hsa-26039	TTTCTGTGTGGAATTTGAATATCTGAAA	28
piR-hsa-26045	TTTCTTGTCGGGCTGATCTGGTTGTGATGT	30
piR-hsa-26075	TTTGAGGAAACCTGGTGTGGCACAAGTT	28
piR-hsa-26080	TTTGAGGGTGATGATGGATTCTGTGT	26
piR-hsa-26094	TTTGATGAAGGCCATGCCGTGTGTCCGTA	29
piR-hsa-26105	TTTGCAGGGAAAACACTTCAGCATGGT	27
piR-hsa-26131	TTTGGCAATGGTAGAACTCACACTGGTGAGGT	32
piR-hsa-26149	TTTGGTCTAAGCTGTGCCCTGCCACCA	27
piR-hsa-26257	GAAACTGGTGTATCCTTATCACGGTGTT	28
piR-hsa-26284	GAACAATATTATTCAGACCTGGAGGC	26
piR-hsa-26320	GAACTGTGGCTTACAGTGCGGGTGGGC	27
piR-hsa-26345	GAAGATGTCAGTATTGAATATGGTGG	26
piR-hsa-26371	GAAGGTTGACGAAAATTCTTACTGAGCA	28
piR-hsa-26399	GAATGCAGCCCAAAGCGGGTGGTAAACT	28
piR-hsa-26424	GACAAATGGTGTGCATACCCCACCTCACGT	30
piR-hsa-26427	GACAACAACGGCGGCCGTGACTATGCT	27
piR-hsa-26435	GACAAGTGTATGACTGCCTTTGAGCTGTAGT	31
piR-hsa-26440	GACAATAGCCAAAACAGGAGATGGGCGGGT	30
piR-hsa-26445	GACACACAGGACCTGGTGCTGGATGG	26
piR-hsa-26468	GACAGAGAAAACAAGGTGGTGAACTATGCCC	31
piR-hsa-26492	GACATCCCGATGGTGCAGCCGCTATTAAA	29
piR-hsa-26508	GACATTGGTGGTTCAGTGGTAGAATTCT	28
piR-hsa-26577	GACCTGGAGATGTACGGTGTGAACTACTT	29
piR-hsa-26587	GACGAGGACAGAATTGATGAGCCTGA	26
piR-hsa-26589	GACGAGGTGGCCGAGTGGTTAAGGCAATGG	30
piR-hsa-26590	GACGAGGTGGCCGAGTGGTTAAGGCAATGGA	31
piR-hsa-26593	GACGAGGTGGCCGAGTGGTTAAGGCTATGGAC	32
piR-hsa-26608	GACGGTGTGAATGACTCTCCAGCTTTGAAG	30
piR-hsa-26612	GACGTTGAAAGGTGTGACGTTGAAAGAG	28
piR-hsa-26613	GACGTTGAAAGGTGTGACGTTGAAAGAGGCAA	32
piR-hsa-26619	GACTACAGAGAGCCCTTCTTCCGAAA	26
piR-hsa-26632	GACTCAGATGGATTCCAGAAGAAGCA	26
piR-hsa-26665	GACTTGGATGCCCATGGAATTATCTTC	27
piR-hsa-26681	GAGAAAGCTCACAAGAACTGCTAACTCAC	29
piR-hsa-26685	GAGAAAGCTCACAAGAACTGCTAACTCATG	30
piR-hsa-26686	GAGAAAGCTCACAAGAACTGCTAACTCATGC	31
piR-hsa-26739	GAGACTGAGAGTTGGTGCTGGTGGTT	26
piR-hsa-26747	GAGAGAGGGGCCCGTGCCTTGGAAAGTG	28
piR-hsa-26754	GAGAGGGGCCCGTGCCTTGGAAAGCGTCGCG	31
piR-hsa-26758	GAGAGTGATGAGTTGCACACTGGTGG	26
piR-hsa-26803	GAGCACTGTTCGTAACCCGTTAGCCT	26
piR-hsa-26818	GAGCATGGTAATGGATTTATGGTGGGTC	28
piR-hsa-26819	GAGCATGGTAATGGATTTATGGTGGGTCCTT	31
piR-hsa-26838	GAGCGAGGTGAGAAGCTAGATGACTT	26
piR-hsa-26842	GAGCGTGACCAGCCTGTGGACTGCGCCCC	29
piR-hsa-26858	GAGGAAAGGTCTGGAGCCAGTGTATTGCA	29
piR-hsa-26859	GAGGAAGACGTGGCTACCCTACTTGC	26
piR-hsa-26872	GAGGAATGATGACAAGAAAAGGCCGAA	27
piR-hsa-26887	GAGGAGATGAAGGTGAAGCTGCTGGAG	27
piR-hsa-26888	GAGGAGATGAAGGTGAAGCTGCTGGAGC	28
piR-hsa-26925	GAGGCGGGCATGACACAGCAAGACGAGAAG	30
piR-hsa-26940	GAGGGCGTGATCATGAAAGGTGATAAGCTCTT	32
piR-hsa-26946	GAGGGGCCCGTGCCTTGGAAAGCGTCGCG	29
piR-hsa-26947	GAGGGTCCAGGGTTCATGTCCCTGTTCAG	29
piR-hsa-26974	GAGGTGCTGTAGGCTTGCAGGAACCCCGGT	30
piR-hsa-27007	GAGTAGAGTGCTTAGTTGAACAGGGCC	27
piR-hsa-27025	GAGTTCATCTTCTCAGAGCTGCTGTCCAA	29
piR-hsa-27034	GATAAGAAGGTACTGGAGATGCTTCC	26
piR-hsa-27040	GATAGCATGAGTTGGGTATAAGAACA	26
piR-hsa-27105	GATGCTATCAATGAGTTTGATTTCCTGGGC	30
piR-hsa-27124	GCAGTAGCATTGGTGGTTCAGTGGTAGA	28
piR-hsa-27133	GCCTGGATAGCTCAGTTGGTAGAGCATCA	29
piR-hsa-27134	GCCTGGATAGCTCAGTTGGTAGAGCATCAGA	31
piR-hsa-27137	GCCTGGGTAGCTCAGTCGGTAGAGCA	26
piR-hsa-27138	GCCTGGGTAGCTCAGTCGGTAGAGCATCAG	30
piR-hsa-27139	GCCTGGGTAGCTCAGTCGGTAGAGCATCAGA	31
piR-hsa-27140	GCCTGGGTAGCTCAGTCGGTAGAGCATCAGAC	32
piR-hsa-27199	GTCAGCGTCTACAGGCCCAACCTCTGCCTC	30
piR-hsa-27208	GATGTCTGTGTGGAAAGCGGCTGTGCA	27
piR-hsa-27222	GATTATGATGATGCCTTAACACTGACT	27
piR-hsa-27230	GATTGGTGTTGGGAAAGGACCTGGAAGTG	29
piR-hsa-27242	GCAAACGCAAGTCGTGGATGAGTAAGGTGT	30
piR-hsa-27243	GCAAACTGAAAGAAATCAGTCCCTTCTGGTA	31
piR-hsa-27282	GCAATAACAGGTCTGTGATGCCCTTAGA	28
piR-hsa-27283	GCAATCACTGATGTCTCCATGTCTCTGAGCA	31
piR-hsa-27396	GCAGAGGACCCTGATCAGAGTGAGACGTC	29
piR-hsa-27398	GCAGAGTGGCGCAGCGGAAGCGTGCTG	27
piR-hsa-27399	GCAGAGTGGCGCAGCGGAAGCGTGCTGG	28
piR-hsa-27400	GCAGAGTGGCGCAGCGGAAGCGTGCTGGGCCC	32
piR-hsa-27489	GCATTGGTATAGTGGTATCATGCAAGA	27
piR-hsa-27490	GCATTGGTGGTATAGTGGTAAGCATAGC	28
piR-hsa-27491	GCATTGGTGGTATAGTGGTGAGCATA	26
piR-hsa-27492	GCATTGGTGGTATAGTGGTGAGCATAGC	28
piR-hsa-27493	GCATTGGTGGTTCAGTGGTAGAATTCTCAC	30
piR-hsa-27513	GCCAAGGTCGCGGGTTCGGTCCCCGTACGGG	31
piR-hsa-27615	GCCCCTGTGATGAGTTGCCATGCTAATACGGA	32
piR-hsa-27616	GCCCGGATGATCCTCAGTGGTCTGGGGTGC	30
piR-hsa-27619	GCCCGGCTAGCTCAGTCGGTAGAGCATGA	29
piR-hsa-27620	GCCCGGCTAGCTCAGTCGGTAGAGCATGAG	30
piR-hsa-27621	GCCCGGCTAGCTCAGTCGGTAGAGCATGAGA	31
piR-hsa-27622	GCCCGGCTAGCTCAGTCGGTAGAGCATGAGAC	32
piR-hsa-27648	GCCTAGAGCCGTGTTGTTCGTAGCTGGA	28
piR-hsa-27712	GCGGTGAGCGTCTGGCCTTGGCCTTGGCCC	30
piR-hsa-27719	GCGTCTACAAGGATGGAGGGGAGCTACTC	29
piR-hsa-27725	GCGTTGGTATAGTGGTGAGCATAGCTGC	28
piR-hsa-27728	GCTAAAAGAGCACACCCGTCTATGTAGCAAA	31
piR-hsa-27729	GCTAAACCTAGCCCCAAACCCACTCC	26
piR-hsa-27730	GCTAAACCTAGCCCCAAACCCACTCCA	27
piR-hsa-27731	GCTAAACCTAGCCCCAAACCCACTCCACCCT	31
piR-hsa-27750	GCTATCTATAACCTTAGCTAGAGTGTCGCC	30
piR-hsa-27888	GCTTGGTGGGACCTGACGAGTTGGTGT	27
piR-hsa-27907	GGAAATTATGATGCCTGTCTACAACACC	28
piR-hsa-27928	GGAACTGTCAGAAATCCTCATGCCTTTCAA	30
piR-hsa-28001	GGAGATGACATGGTTTGTGATGATCCGGA	29
piR-hsa-28019	GGAGGTGATGAACTGTCTGAGCCTGACC	28
piR-hsa-28057	GGATTGTAGAAAGCAGTGTGACCAGTGC	28
piR-hsa-28116	GGCAGAGTGGCGCAGCGGAAGCGTGCTGGGCC	32
piR-hsa-28131	GGCATTGGTGGTTCAGTGGTAGAATTCTCGC	31
piR-hsa-28157	GGCCACATGATCCTAGAGAACTGCAGC	27
piR-hsa-28160	GGCCAGCCTGGTCCACATGGGTCGGAA	27
piR-hsa-28175	GGCCCCATGGTGTAATGGTCAGCACTC	27
piR-hsa-28183	GGCCGGTTAGCTCAGTTGGTAAGAGC	26
piR-hsa-28184	GGCCGGTTAGCTCAGTTGGTAAGAGCTTGGT	31
piR-hsa-28185	GGCCGGTTAGCTCAGTTGGTCAGAGC	26
piR-hsa-28186	GGCCGGTTAGCTCAGTTGGTTAGAGC	26
piR-hsa-28187	GGCCGTGATCGTATAGTGGTTAGTAC	26
piR-hsa-28188	GGCCGTGATCGTATAGTGGTTAGTACT	27
piR-hsa-28189	GGCCGTGATCGTATAGTGGTTAGTACTC	28
piR-hsa-28190	GGCCGTGATCGTATAGTGGTTAGTACTCTG	30
piR-hsa-28205	GGCGACAAACCTACCGAGCCTGGTGATAG	29
piR-hsa-28206	GGCGACACAGGTGATGGCGGAGCCGG	26
piR-hsa-28209	GGCGATGAGGAGGTACCTATTGTGTTGAGA	30
piR-hsa-28210	GGCGATGAGGAGGTACCTATTGTGTTGAGAA	31
piR-hsa-28212	GGCGGGAGTAACTATGACTCTCTTAAGGTA	30
piR-hsa-28223	GGCTCGTTGGTCTAGGGGTATGATTCTCGG	30
piR-hsa-28231	GGCTCTGTTGCGCAATGGATAGCGCAT	27
piR-hsa-28234	GGCTGAGATAGTTGATGTTGCTCTGG	26
piR-hsa-28244	GGCTGGTCTCGAACTCCTGACCTCAGGT	28
piR-hsa-28277	GGGAAATGAACCGCCTTGGTGCTTCTGGGA	30
piR-hsa-28287	GGGAAGAACGAACCTTGACGTTGCAGTGCA	30
piR-hsa-28299	GGGAAGTGATGACACCTGTGACTGTTGAT	29
piR-hsa-28318	GGGAGATGAAGAGGACAGTGACTGAGAGA	29
piR-hsa-28319	GGGAGATGAAGAGGACAGTGACTGAGAGAC	30
piR-hsa-28322	GGGAGGCCCGGGTTCGTTTCCCGGCCAATGCA	32
piR-hsa-28333	GGGATTGCTAGCAAGGTACCTGCTGA	26
piR-hsa-28345	GGGCATACTCGTAGACCTTGCCTGACTG	28
piR-hsa-28374	GGGGATGTAGCTCAGTGGTAGAGCGCATGCT	31
piR-hsa-28382	GGGGCGAAGCTACCATCTGTGGGATT	26
piR-hsa-28383	GGGGCGAGTGTCTGCCCTGGTGCTGTATCTGC	32
piR-hsa-28384	GGGGCGGCCGGTTAGCTCAGTTGGTAAGAGC	31
piR-hsa-28390	GGGGGATTAGCTCAAATGGTAGAGCGCTCG	30
piR-hsa-28391	GGGGGGTGTAGCTCAGTGGTAGAGCGCGTGC	31
piR-hsa-28392	GGGGGGTGTAGCTCAGTGGTAGAGCGCGTGCT	32
piR-hsa-28394	GGGGGTATAGCTCAGTGGCAGAGCATTTGA	30
piR-hsa-28395	GGGGGTATAGCTCAGTGGGTAGAGCAT	27
piR-hsa-28396	GGGGGTATAGCTCAGTGGTAGAGCATTT	28
piR-hsa-28397	GGGGGTATAGCTCAGTGGTAGAGCATTTG	29
piR-hsa-28398	GGGGGTATAGCTCAGTGGTAGAGCATTTGA	30
piR-hsa-28400	GGGGGTGTAACTCAGTGGTAGAGCATTTGA	30
piR-hsa-28401	GGGGGTGTAGCTCAGTGGTAGAGAGCGTGCT	31
piR-hsa-28402	GGGGGTGTAGCTCAGTGGTAGAGCGCGTG	29
piR-hsa-28403	GGGGGTGTAGCTCAGTGGTAGAGCGCGTGC	30
piR-hsa-28405	GGGGGTGTAGCTCAGTGGTAGAGCGCGTGCTT	32
piR-hsa-28406	GGGGGTNTAGCTCAGTGGTAGAGCGCGTGC	30
piR-hsa-28407	GGGGGTNTAGCTCAGTGGTAGAGCGCGTGCTT	32
piR-hsa-28419	GGGGTGTAGCTCAGTGGTAGAGAGCGTGCTT	31
piR-hsa-28421	GGGGTNTAGCTCAGTGGTAGAGCGCGTGCTT	31
piR-hsa-28467	GGTAGTGTGGCCGAGCGGTCTAAGGC	26
piR-hsa-28478	GGTCAGTCGGTCCTGAGAGATGGGCGAGC	29
piR-hsa-28487	GGTCGATGATGATTGGTAAAAGGTCTGATA	30
piR-hsa-28488	GGTCGCTGGTTCGAATCCGGCTCGAAGGACC	31
piR-hsa-28509	GGTGCTGATGACACCCACTGGCTGAAC	27
piR-hsa-28525	GGTTAGTTTTACCCTACTGATGATGTGTTGTT	32
piR-hsa-28527	GGTTCCATGGTGTAATGGTTAGCACTCTG	29
piR-hsa-28576	GTAGACTGGATGCTTCTGTTGAGGAGA	27
piR-hsa-28590	GTAGTCGTGGCCGAGTGGTTAAGGCTATGGA	31
piR-hsa-28593	GTATATGGCATGTGGGCTAGTTTCAGACAGGT	32
piR-hsa-28599	GTATTGTCTGGAAGCCCCATGAGATGGTAA	30
piR-hsa-28610	GTCAGGGACATTTCTGAAGCGAGCGT	26
piR-hsa-28629	GTCCATGATGATTTCAAGTTATCCCTGTCTGA	32
piR-hsa-28634	GTCCGGTGCGGAGTGCCCTTCGTCCTGGGAA	31
piR-hsa-28643	GTCGAGTGGTAAAGGGCAAAGTGGAG	26
piR-hsa-28646	GTCGGGTTGCTTGGGAATGCAGCCCAAA	28
piR-hsa-28656	GTCTGAAGGAAGGCCTGACGGTGCAAGAA	29
piR-hsa-28702	GTGAGGATGAACAGGATGACTGTCTGCCT	29
piR-hsa-28716	GTGATGGGTTTTAAGCATGAGCCAAGGAA	29
piR-hsa-28777	GTGGATGATGACCCCGAGGTGCGGAAGAA	29
piR-hsa-28812	GTGGTGGCGGCGGCGGCGGAGGCGGAC	27
piR-hsa-28819	GTGTAGCTCAGTGGTAGAGCGCGTGCTTCGC	31
piR-hsa-28839	GTTAACCGAAAGGTTGGTGGTTCGAGCCCA	30
piR-hsa-28841	GTTAAGATGGCAGAGCCCGGTAATCGCATAA	31
piR-hsa-28845	GTTCACTGATGAGAGCATTGTTCTGAGC	28
piR-hsa-28846	GTTCACTGATGAGAGCATTGTTCTGAGCCA	30
piR-hsa-28847	GTTCAGTGATGAGGCCTGGAATGTGCGCT	29
piR-hsa-28848	GTTCAGTGATGAGGCCTGGAATGTGCGCTG	30
piR-hsa-28849	GTTCAGTGATGAGGCCTGGAATGTGCGCTGG	31
piR-hsa-28850	GTTCAGTGATGAGGCCTGGAATGTGCGCTGGG	32
piR-hsa-28851	GTTCATGATGACACAGGACCTTGTCTGAAC	30
piR-hsa-28875	GTTTAGACGGGCTCACATCACCCCATAAACA	31
piR-hsa-28876	GTTTCCGTAGTGTAGTGGTCATCACGTTCGC	31
piR-hsa-28877	GTTTCCGTAGTGTAGTGGTCATCACGTTCGCC	32
piR-hsa-28927	TAAAACTCTGAGGCTTTGGTGAGCGC	26
piR-hsa-28950	TAAAAGGTGGAAGTTTTGTTTGACTGT	27
piR-hsa-28959	TAAAATATCAATGCCTGATTTGGACCT	27
piR-hsa-28991	TAAACAGGTTAAGTAGCAGGTTGGGTT	27
piR-hsa-29024	TAAACGCGGTTAGTGCAAGCATCTGGGCCA	30
piR-hsa-29025	TAAACGTACACCTACTGAATGGATTCA	27
piR-hsa-29114	TAACGCCAAGGTCGCGGGTTCGAACCCCGTA	31
piR-hsa-29133	TAAGGACCTAGGACTTGCTGACGGTGTCTT	30
piR-hsa-29143	TAAGGATGTGAATTGGCTTTAAGCAGTAGA	30
piR-hsa-29173	TAATTGGTGCATCCTGTGTAAATGGAAGCT	30
piR-hsa-29186	TACAGCCGGAGTAGTTATGGTCAGTCA	27
piR-hsa-29218	TAAAGTGCTGACAGTGCAGATAGTGGTCCTC	31
piR-hsa-29251	TAAATGCGGTGGCATCGACAAAAGAAC	27
piR-hsa-29312	TAACACACTGAACCGCTACAAGAGGGCAA	29
piR-hsa-29350	TAACATCAAGAGAACTGTCAGGAGCCC	27
piR-hsa-29415	TAACCCTGATGACTTGTACTGATTCCTGAGC	31
piR-hsa-29416	TAACCGAAAGGTTGGTGGTTCGAGCC	26
piR-hsa-29417	TAACCGAAAGGTTGGTGGTTCGAGCCC	27
piR-hsa-29418	TAACCGGTCTCAATAAAGCAGAAACTGCTGC	31
piR-hsa-29463	TAACTGGTGATGGTACGACTTCTAATGTCC	30
piR-hsa-29467	TAACTGTGGTGGGAACTGCCTTTGTCTC	28
piR-hsa-29602	TAAGCAAGGAGGTGGATCTCTGCAAAC	27
piR-hsa-29715	TAAGGTGCATCTAGTGCAGATAGTGAAGT	29
piR-hsa-29716	TAAGGTGCATCTAGTGCAGATAGTGAAGTA	30
piR-hsa-29835	TAATCTTCGACTGAAGAAAGCCTTCGATCCC	31
piR-hsa-29842	TAATGACAATGGTGCTGTGTAAACCCT	27
piR-hsa-29940	TACAAAGTGACTAATGGGGCTTTTACT	27
piR-hsa-29996	TACAATGGCCTCTTTAGACCCAGCTCCTGCCT	32
piR-hsa-30005	TACACAAGCACAGTTAGTTGGGTGAAGTC	29
piR-hsa-30046	TACACCTAAGAAACAAGGAGGACTGGGA	28
piR-hsa-30050	TACACGGACCTGGATTCAGAACTTAAGATC	30
piR-hsa-30106	TACAGACTGGGGATGTCATCTACTTGGTGTA	31
piR-hsa-30194	TACAGTTGCATGGAGCTGCTTAAGATCTGA	30
piR-hsa-30207	TACATCATGGACCAAAGGACAGACAG	26
piR-hsa-30208	TACATCATGGACCAAAGGACAGACAGGC	28
piR-hsa-30209	TACATCATGGACCAAAGGACAGACAGGCT	29
piR-hsa-30210	TACATCATGGACCAAAGGACAGACAGGCTGC	31
piR-hsa-30211	TACATCATGGACCAAAGGACAGACAGGCTGT	31
piR-hsa-30218	TACATCGGATTCATCCTTACCCTCAACGAA	30
piR-hsa-30272	TACCAACCTCGTCATGACTGTGCTAA	26
piR-hsa-30275	TACCAAGAACCTTGATGCCCAAAGCCA	27
piR-hsa-30298	TACCACACCCATGTGTCTGTCGGTCC	26
piR-hsa-30321	TACCACTGGGACTGTGGCCTGGCCTGC	27
piR-hsa-30326	TACCAGAAGGCGGATGATGGGCGTCCC	27
piR-hsa-30329	TACCAGAGCCAGAGGGCAGTGCGGAA	26
piR-hsa-30330	TACCAGAGGTGCTGTAGGCTTGCAGGAA	28
piR-hsa-30331	TACCAGAGGTGCTGTAGGCTTGCAGGAAC	29
piR-hsa-30332	TACCAGAGGTGCTGTAGGCTTGCAGGAACT	30
piR-hsa-30352	TACCAGGACTGAGTCATGATTTGGGCA	27
piR-hsa-30379	TACCATGCTGTTTTGGTTGCTGTGGCCTA	29
piR-hsa-30386	TACCATGTCTGGACGTGGCAAGCAGG	26
piR-hsa-30387	TACCATTTTGGCGTGAGAGCTGGTGGT	27
piR-hsa-30435	TACCCTACGTCACGGCAGTCTCCGCAGAT	29
piR-hsa-30466	TACCGGAGCTGTGTGGTGTGTGGACGC	27
piR-hsa-30488	TACCTCATGAAGATCCTCACCGAGCGCGGC	30
piR-hsa-30489	TACCTCATGAAGATCCTCACTGAGCGAGGC	30
piR-hsa-30506	TACCTGAAAATGTGGAAACGACTTTGGAAC	30
piR-hsa-30514	TACCTGATGTTCCTGAAAGATGTTCCTGA	29
piR-hsa-30531	TACCTGGTGTTGGGGACTGAGGAACCAGG	29
piR-hsa-30551	TACCTTGAGTTATGGTAGAGATGGCAGA	28
piR-hsa-30576	TACGACGTGATCTGGATCCAGTGGGT	26
piR-hsa-30580	TACGAGAGTACAAGGTAGTGGGTCGCTGC	29
piR-hsa-30593	TACGATGATGGCTGCGAGCCCTGCGG	26
piR-hsa-30628	TACGGCCTGGTGGTGGCAGTCCTCATC	27
piR-hsa-30636	TACGTACATAACCTAAACCTACTCCAATGCTA	32
piR-hsa-30667	TACTACAGTCGAATGGCCAACTATCGGAAC	30
piR-hsa-30729	TACTCCCAGAATTCAGGTCGTGCTTGT	27
piR-hsa-30734	TACTCCTGCTCGCATCTGCTATAGTGGAGGCA	32
piR-hsa-30736	TACTCGCGTCGGAACCTGCAGACACTTGT	29
piR-hsa-30745	TACTCTTACCTGGTGCTACTGTTTCC	26
piR-hsa-30778	TACTGCAGATCCGCATGTGGACCATGAGA	29
piR-hsa-30860	TACTTCGTGCTGTCCAGCTGGTGGGCC	27
piR-hsa-30861	TACTTCGTGCTGTCCAGCTGGTGGGCCA	28
piR-hsa-30876	TAGCAGCCAAGGAAAAGGGAAACATG	26
piR-hsa-30977	TACTTTGGGAAAGTTGGTATGAAGCA	26
piR-hsa-30995	TAGAAAAGTTTGAGAAGGATTGGTGTTC	28
piR-hsa-31111	TAGAATGGCATCGCTTCAGATTTGGA	26
piR-hsa-31237	TAGAGCATGAGACTCTTAATCTCAGGGTCGT	31
piR-hsa-31238	TAGAGCATGAGACTCTTAATCTCAGGGTCGTG	32
piR-hsa-31280	TAGAGGCTGAAGGCATTCAAAGGTTCC	27
piR-hsa-31315	TAGATAAGGAGTGGGAGCTTTAGAGGCAA	29
piR-hsa-31336	TAGATGACTGTCCTGACCTAGAGCCGTGTT	30
piR-hsa-31345	TAGATGGAAAGAGGTTGCCGACGTATGA	28
piR-hsa-31355	TAGATGGTGACTGGTGCACCTGCTCC	26
piR-hsa-31362	TAGATGTGGGACAAGGATTTAAAAAG	26
piR-hsa-31397	TAGCAAGGGTGTTTACTCAGGATTTGGGT	29
piR-hsa-31448	TAGCAGGTGCTGTGGATGCTGCTGGT	26
piR-hsa-31449	TAGCAGTGATGATTTTGGGTCCTGCCGTA	29
piR-hsa-31548	TAGCCTGAAGAGTCTGAACTCACGTTGGC	29
piR-hsa-31549	TAGCCTGAAGAGTCTGAACTCACGTTGGCA	30
piR-hsa-31556	TAGCCTGTTATAGTGGACAGCTTGCTGC	28
piR-hsa-31634	TAGCTTACCCCTGTGTGCTGGCCTTGGT	28
piR-hsa-31643	TAGCTTGGGGGTTAGGGGTTGTCTCT	26
piR-hsa-31742	TAGGAGGATGACATGGAGGAGGACGACGA	29
piR-hsa-31774	TAGGATGAGAGCAGAGACTCAGTGTG	26
piR-hsa-31796	TAGGATGTTGTTGGGGAAGGCACTTGGG	28
piR-hsa-31870	TAGGCTGGAGCGTCTTGGATGTGGCCTTC	29
piR-hsa-32059	TAGGTTGATTTCCTGTGTAACGCTGCTC	28
piR-hsa-32106	TAGTCAACTGAACACTGGGCCACTTACCTC	30
piR-hsa-32122	TAGTCAGTGAAGACTGAGGTATCTGTAGAAG	31
piR-hsa-32153	CTGAGCAACATAGCGAGACCCCGTCTCTA	29
piR-hsa-32154	CCTGAGCAACATAGCGAGACCCCGTCTCT	29
piR-hsa-32155	TGGAAAGGATGAAGAGCTGACTGATGG	27
piR-hsa-32156	TGGAAAGGATGAAGAGCTGACTGATG	26
piR-hsa-32157	TGCAGTGTGGAACACAATGAACTGAAC	27
piR-hsa-32158	CCCCACTGCTAAATTTGACTGGCT	24
piR-hsa-32159	CCCCCCACTGCTAAATTTGACTGGCT	26
piR-hsa-32160	CCCCCACTGCTAAATTTGACTGG	23
piR-hsa-32161	CCCCCCACTGCTAAATTTGACTGG	24
piR-hsa-32162	CCCCCCACTGCTAAATTTGACTGGC	25
piR-hsa-32163	CACAATGCTGACACTCAAACTGCTGACA	28
piR-hsa-32165	GCCTGAGCAACATAGCGAGACCCCGTCTCTA	31
piR-hsa-32166	GGAAAGGATGAAGAGCTGACTGATGG	26
piR-hsa-32167	CCCCCACTGCTAAATTTGACTGGCT	25
piR-hsa-32168	TGTAGTGCGCTATGCCGATCGGGTGT	26
piR-hsa-32170	GTAGTCGTGGCCGAGTGGTTAAGGCTATG	29
piR-hsa-32171	TCGGAACCTGCAGACACTTGTGGA	24
piR-hsa-32172	TCACAATGCTGACACTCAAACTGCTGAC	28
piR-hsa-32174	GTAGTGCGCTATGCCGATCGGGTGT	25
piR-hsa-32175	GTAGTGCGCTATGCCGATCGGGTGTC	26
piR-hsa-32176	CACTGATGAGAGCATTGTTCTGAGC	25
piR-hsa-32177	TGATCAGTAGTGGGATCGCGCCTGTGA	27
piR-hsa-32179	CCCCCACTGCTAAATTTGACTGGC	24
piR-hsa-32180	TCACAATGCTGACACTCAAACTGCTGA	27
piR-hsa-32181	TGATCAGTAGTGGGATCGCGCCTGTG	26
piR-hsa-32182	CCCCCACTGCTAAATTTGACTGGCTA	26
piR-hsa-32184	AGTGCGCTATGCCGATCGGGTGTCC	25
piR-hsa-32185	TGTAGTGCGCTATGCCGATCGGGTG	25
piR-hsa-32186	CCCCACTGCTAAATTTGACTGGT	23
piR-hsa-32187	CCCCCCACTGCTAAATTTGACTG	23
piR-hsa-32192	TGTAGTGCGCTATGCCGATCGGGTGTC	27
piR-hsa-32194	AGCCTGAGCAACATAGCGAGACCCCGTCTCT	31
piR-hsa-32195	CCCCCCACTGCTAAATTTGACTGGT	25
piR-hsa-32196	ATGCAGTGTGGAACACAATGAACTGAA	27
piR-hsa-32198	GTTCACTGATGAGAGCATTGTTCTGA	26
piR-hsa-32199	TTCACTGATGAGAGCATTGTTCTGA	25
piR-hsa-32201	GCCTGAGCAACATAGCGAGACCCCGTCTCT	30
piR-hsa-32204	TTGCAAGCAACACTCTGTGGCAGATGA	27
piR-hsa-32205	TGGGCACAGAAGTTAGGAAGGGCTGT	26
piR-hsa-32207	GTAGTGCGCTATGCCGATCGGGTGTCC	27
piR-hsa-32211	TCGGAACCTGCAGACACTTGTGGAG	25
piR-hsa-32213	GATCAGTAGTGGGATCGCGCCTGTGA	26
piR-hsa-32217	GATAGCATGAGTTGGGTATAAGAAC	25
piR-hsa-32220	TCTACTGAACTGCCATGAGGAAAC	24
piR-hsa-32221	TAGTGCGCTATGCCGATCGGGTGTC	25
piR-hsa-32235	CCCCCACTGCTAAATTTGACTGGT	24
piR-hsa-32236	CCTGATGTTACATTGTAGTGTGCTGATG	28
piR-hsa-32238	CCCCCACTGCTAAATTTGACTGGTT	25
piR-hsa-32249	TCTTCTCGGAGCTGCTGTCCAAC	23
piR-hsa-32252	TCAGTAGTGGGATCGCGCCTGTGAAT	26
piR-hsa-32256	CACAATGCTGACACTCAAACTGCTGA	26
piR-hsa-32260	CACAATGCTGACACTCAAACTGCTGAC	27
piR-hsa-32261	GCAGTGTGGAACACAATGAACTGAAC	26
piR-hsa-32274	TGGGCACAGAAGTTAGGAAGGGCTGTC	27
piR-hsa-32280	ATCAGTAGTGGGATCGCGCCTGTGAA	26
piR-hsa-32297	TCTTCTCGGAGCTGCTGTCCAACC	24
piR-hsa-32298	TTAAGGGGAACGTGTGGGCTATTTAGG	27
piR-hsa-32299	TTCCGGGTTCGAGTCCCGGCGGAGTCG	27
piR-hsa-32319	TCTCCAACAAGAGAATAGTAGGCTGC	26
piR-hsa-32326	TCGCGTCGGAACCTGCAGACACTCGT	26
piR-hsa-32370	TCAGGGACATTTCTGAAGCGAGCG	24
piR-hsa-32375	GTCGATGATGATTGGTAAAAGGTCTGA	27
piR-hsa-32450	CTGGAATGCTTGAACCCCTTGGCAGCT	27
piR-hsa-32458	TTGCAAGCAACACTCTGTGGCAGATGAT	28
piR-hsa-32492	GAGTTCGATCCTCACACGGGGCACCA	26
piR-hsa-32497	TCGGAACCTGCAGATACTTGTGGAGGA	27
piR-hsa-32502	GGCAGGGTCATAGGACAATAGTGGA	25
piR-hsa-32506	TGACTGTGCTGTCCTGATTGTTGC	24
piR-hsa-32521	CTTCAACATGTCCGAGACTGCGC	23
piR-hsa-32522	ATGCAGTGTGGAACACAATGAACTG	25
piR-hsa-32528	TACATCATGGACCAAAGGACAGAC	24
piR-hsa-32538	CTACTGAACTGCCATGAGGAAAC	23
piR-hsa-32547	TCTTCTCGGAGCTGCTGTCCAACCT	25
piR-hsa-32554	GAGAACATTGACGACGCTAAGGATGC	26
piR-hsa-32580	GTCGATGATGATTGGTAAAAGGTCTGAT	28
piR-hsa-32583	TGTACCAGAGGTGCTGTAGGCTTGCAGG	28
piR-hsa-32585	GGAAAGGATGAAGAGCTGACTGATGGA	27
piR-hsa-32588	CAGTGTGGAACACAATGAACTGAAC	25
piR-hsa-32591	GATCAGTAGTGGGATCGCGCCTGTGAAT	28
piR-hsa-32593	TACATCATGGACCAAAGGACAGA	23
piR-hsa-32612	TTCATCTTCTCAGAGCTGCTGTCCAACC	28
piR-hsa-32615	TCCAGAACGAACAGCCTGACACATACG	27
piR-hsa-32641	GCCTGAGCAACATAGCGAGACCCCGTCTC	29
piR-hsa-32645	TCGCGTCGGAACCTGCAGACACTTGTGG	28
piR-hsa-32653	TGGTCTCGAACTCCTGACCTCAGGTG	26
piR-hsa-32658	GATCAGTAGTGGGATCGCGCCTGTGAA	27
piR-hsa-32667	TCGCGTCGGAACCTGCAGACACTTGT	26
piR-hsa-32687	TCGAGCAGCTATGATTTGGATTGTGGG	27
piR-hsa-32705	TGGCGGGCGCCTGTGGTCCCAGC	23
piR-hsa-32718	CAGAGGTGCTGTAGGCTTGCAGGAAC	26
piR-hsa-32724	TCAAAGATCAGATGGTTGTAGATGTG	26
piR-hsa-32738	CTGGAATGCTTGAACCCCTTGGCAG	25
piR-hsa-32745	TGATCAGTAGTGGGATCGCGCCTGTGAA	28
piR-hsa-32765	TCTACTGAACTGCCATGAGGAAACT	25
piR-hsa-32767	GGCAGAGACTTGGGGATGGAACCG	24
piR-hsa-32768	GAACTGAACAGACGGAGAAGATGTG	25
piR-hsa-32773	GAACGTGCTGAACAAGAGCAACG	23
piR-hsa-32786	TGACTTGAGAACAGCCTCTGCAGGCCCTG	29
piR-hsa-32795	ACCCAGGGACGCGTGGTGACTTT	23
piR-hsa-32797	GGAAAGAGCTTTAGGACAGCTTAGATG	27
piR-hsa-32798	CGGCATCAATATGGTGACCTCCCGG	25
piR-hsa-32800	TGTAAAAGACGTGAACCAGCAGGA	24
piR-hsa-32803	AGAACATTGACGACGCTAAGGATGCC	26
piR-hsa-32809	CGAGAGTACAAGGTAGTGGGTCGCTG	26
