# Supplementary material for: piRNAs in the human retina and retinal pigment epithelium reveal a potential role in intracellular trafficking and oxidative stress
Source: Royal Society of Chemistry journal article supplement (doi:10.1039/d3mo00122a), 2024-01-15
Supplement: d3mo00122a4.xlsx [file d3mo00122a4.xlsx]

## Sheet: Total piRNA targets
Gene ID	Species	Gene Name
AL133077	Homo sapiens	FERM domain containing 1(FRMD1)
BC013755	Homo sapiens	TELO2 interacting protein 1(TTI1)
AK123858	Homo sapiens	glutamine and serine rich 1(QSER1)
AK054750	Homo sapiens	zinc finger protein 655(ZNF655)
CR627133	Homo sapiens	zinc finger protein 850(ZNF850)
AK097002	Homo sapiens	nicotinate phosphoribosyltransferase(NAPRT)
AK131487	Homo sapiens	protein tyrosine kinase 7 (inactive)(PTK7)
BC025736	Homo sapiens	prominin 2(PROM2)
AK123854	Homo sapiens	ankyrin repeat and SOCS box containing 18(ASB18)
AK054754	Homo sapiens	phospholipase C beta 4(PLCB4)
HM005364	Homo sapiens	triokinase and FMN cyclase(TKFC)
BX537967	Homo sapiens	transcription factor 12(TCF12)
AK091706	Homo sapiens	insulin like growth factor binding protein 3(IGFBP3)
U87284	Homo sapiens	phosphate regulating endopeptidase homolog X-linked(PHEX)
U01848	Homo sapiens	major histocompatibility complex, class I, B(HLA-B)
BC125116	Homo sapiens	syntaxin binding protein 4(STXBP4)
L36052	Homo sapiens	thrombopoietin(THPO)
X52479	Homo sapiens	protein kinase C alpha(PRKCA)
BX640997	Homo sapiens	proline rich 27(PRR27)
AL833027	Homo sapiens	protein-L-isoaspartate (D-aspartate) O-methyltransferase domain containing 1(PCMTD1)
BC025741	Homo sapiens	chromosome 16 open reading frame 54(C16orf54)
AK313254	Homo sapiens	carbonic anhydrase 3(CA3)
AK054767	Homo sapiens	RAB22A, member RAS oncogene family(RAB22A)
AK294414	Homo sapiens	NBPF member 9(NBPF9)
AK295748	Homo sapiens	solute carrier family 13 member 3(SLC13A3)
BC025747	Homo sapiens	solute carrier family 25 member 48(SLC25A48)
AK290055	Homo sapiens	Ras association domain family member 8(RASSF8)
AL834350	Homo sapiens	protein phosphatase 2 regulatory subunit B'gamma(PPP2R5C)
BC013770	Homo sapiens	netrin G2(NTNG2)
KC136308	Homo sapiens	long intergenic non-protein coding RNA 1488(LINC01488)
KC136307	Homo sapiens	long intergenic non-protein coding RNA 1488(LINC01488)
BX647596	Homo sapiens	metaxin 3(MTX3)
KC136306	Homo sapiens	long intergenic non-protein coding RNA 1488(LINC01488)
KC136304	Homo sapiens	long intergenic non-protein coding RNA 1488(LINC01488)
AK225868	Homo sapiens	uroplakin 1B(UPK1B)
HM005395	Homo sapiens	guanine monophosphate synthase(GMPS)
KC136303	Homo sapiens	long intergenic non-protein coding RNA 1488(LINC01488)
KC136302	Homo sapiens	long intergenic non-protein coding RNA 1488(LINC01488)
KC136301	Homo sapiens	long intergenic non-protein coding RNA 1488(LINC01488)
AK054771	Homo sapiens	AKT serine/threonine kinase 2(AKT2)
AF105151	Homo sapiens	transporter 2, ATP binding cassette subfamily B member(TAP2)
KC136300	Homo sapiens	long intergenic non-protein coding RNA 1488(LINC01488)
AK095287	Homo sapiens	ATPase 13A1(ATP13A1)
AK130176	Homo sapiens	transporter 1, ATP binding cassette subfamily B member(TAP1)
BC080575	Homo sapiens	DDB1 and CUL4 associated factor 15(DCAF15)
BC140715	Homo sapiens	integrator complex subunit 6 like(INTS6L)
AF453528	Homo sapiens	solute carrier family 4 member 5(SLC4A5)
M38054	Homo sapiens	major histocompatibility complex, class II, DO alpha(HLA-DOA)
AB109390	Homo sapiens	transmembrane serine protease 9(TMPRSS9)
AK098315	Homo sapiens	selectin P ligand(SELPLG)
AK054775	Homo sapiens	yippee like 4(YPEL4)
BC036401	Homo sapiens	RPP38 divergent transcript(RPP38-DT)
AK294446	Homo sapiens	adenylate cyclase 6(ADCY6)
AK225872	Homo sapiens	RNA terminal phosphate cyclase like 1(RCL1)
AK131491	Homo sapiens	suppressor of glucose, autophagy associated 1(SOGA1)
AK290073	Homo sapiens	chromosome 22 open reading frame 39(C22orf39)
AF190642	Homo sapiens	phospholipase C epsilon 1(PLCE1)
AK098323	Homo sapiens	solute carrier family 4 member 1 adaptor protein(SLC4A1AP)
AK024079	Homo sapiens	phosphatidylinositol-3,4,5-trisphosphate dependent Rac exchange factor 2(PREX2)
AK098329	Homo sapiens	semaphorin 3B(SEMA3B)
BX640973	Homo sapiens	BLACAT1 overlapping LEMD1 locus(BLACAT1)
BC140722	Homo sapiens	TRIM6-TRIM34 readthrough(TRIM6-TRIM34)
AK057819	Homo sapiens	ZFP92 zinc finger protein(ZFP92)
BC001732	Homo sapiens	translocase of outer mitochondrial membrane 7(TOMM7)
BC025767	Homo sapiens	rhophilin Rho GTPase binding protein 1(RHPN1)
AB095928	Homo sapiens	zinc finger protein 266(ZNF266)
AF086336	Homo sapiens	translocase of outer mitochondrial membrane 7(TOMM7)
AK293102	Homo sapiens	BCL6B transcription repressor(BCL6B)
AK293104	Homo sapiens	glutamate ionotropic receptor delta type subunit 1(GRID1)
BX648022	Homo sapiens	solute carrier family 35 member B3(SLC35B3)
U44128	Homo sapiens	solute carrier family 12 member 3(SLC12A3)
AK172824	Homo sapiens	adaptor related protein complex 5 subunit mu 1(AP5M1)
AK074320	Homo sapiens	Sad1 and UNC84 domain containing 1(SUN1)
AK304359	Homo sapiens	ankyrin repeat and ubiquitin domain containing 1(ANKUB1)
BC050738	Homo sapiens	cleavage and polyadenylation specific factor 4(CPSF4)
AK096596	Homo sapiens	shroom family member 2(SHROOM2)
AK172822	Homo sapiens	F-box and leucine rich repeat protein 17(FBXL17)
AK308715	Homo sapiens	Rab geranylgeranyltransferase subunit alpha(RABGGTA)
AK074327	Homo sapiens	U2 snRNP associated SURP domain containing(U2SURP)
BC025774	Homo sapiens	hyaluronidase 1(HYAL1)
AK021878	Homo sapiens	ZNF594 divergent transcript(ZNF594-DT)
AK126920	Homo sapiens	sphingomyelin phosphodiesterase 4(SMPD4)
X99140	Homo sapiens	keratin 85(KRT85)
BC001727	Homo sapiens	ankyrin repeat domain 10(ANKRD10)
AK304341	Homo sapiens	unc-51 like kinase 4(ULK4)
BC103748	Homo sapiens	N-acetyltransferase 8 like(NAT8L)
AF026692	Homo sapiens	secreted frizzled related protein 4(SFRP4)
AL137486	Homo sapiens	zinc finger protein 71(ZNF71)
BC016835	Homo sapiens	synaptophysin like 1(SYPL1)
AY244357	Homo sapiens	collagen type XXIV alpha 1 chain(COL24A1)
AL137484	Homo sapiens	serine protease 54(PRSS54)
AK095271	Homo sapiens	chromosome 22 open reading frame 39(C22orf39)
AK021862	Homo sapiens	family with sequence similarity 106 member A(FAM106A)
BC140705	Homo sapiens	phospholipase C epsilon 1(PLCE1)
AB055000	Homo sapiens	solute carrier family 34 member 3(SLC34A3)
AK095277	Homo sapiens	ATPase 13A4(ATP13A4)
AK074313	Homo sapiens	glutamine rich 1(QRICH1)
AK074312	Homo sapiens	SREBF chaperone(SCAP)
AK098304	Homo sapiens	SOCS2 antisense RNA 1(SOCS2-AS1)
AK290099	Homo sapiens	zinc finger protein 195(ZNF195)
BC144286	Homo sapiens	phospholipase C epsilon 1(PLCE1)
AK096572	Homo sapiens	myocardin related transcription factor A(MRTFA)
AF419616	Homo sapiens	NBPF member 10(NBPF10)
D63424	Homo sapiens	glycogen synthase kinase 3 alpha(GSK3A)
BX537949	Homo sapiens	guanylate binding protein family member 6(GBP6)
AK096579	Homo sapiens	dynein cytoplasmic 1 intermediate chain 2(DYNC1I2)
AF038660	Homo sapiens	beta-1,4-galactosyltransferase 2(B4GALT2)
AJ001589	Homo sapiens	forkhead box O3(FOXO3)
AF037334	Homo sapiens	EPH receptor B1(EPHB1)
BC068011	Homo sapiens	family with sequence similarity 86 member D, pseudogene(FAM86DP)
BC110065	Homo sapiens	spermatogenesis associated serine rich 1(SPATS1)
AK000913	Homo sapiens	nuclear export mediator factor(NEMF)
AJ549092	Homo sapiens	cAMP responsive element binding protein 3 like 2(CREB3L2)
BC071654	Homo sapiens	ADAM metallopeptidase with thrombospondin type 1 motif 6(ADAMTS6)
AK225827	Homo sapiens	nitric oxide synthase 3(NOS3)
AK122582	Homo sapiens	PEAK1 related, kinase-activating pseudokinase 1(PRAG1)
BC071650	Homo sapiens	gon-4 like(GON4L)
M29145	Homo sapiens	hepatocyte growth factor(HGF)
BX648013	Homo sapiens	transporter 1, ATP binding cassette subfamily B member(TAP1)
BC144275	Homo sapiens	chromosome 5 open reading frame 60(C5orf60)
AK027141	Homo sapiens	DNA fragmentation factor subunit beta(DFFB)
BC035130	Homo sapiens	helicase with zinc finger 2(HELZ2)
CR457345	Homo sapiens	OTU deubiquitinase, ubiquitin aldehyde binding 2(OTUB2)
AK126958	Homo sapiens	long intergenic non-protein coding RNA 1102(LINC01102)
AK172817	Homo sapiens	RNA polymerase I subunit B(POLR1B)
BC048428	Homo sapiens	uncharacterized LOC284933(LOC284933)
BC068012	Homo sapiens	ataxin 2 like(ATXN2L)
U29344	Homo sapiens	fatty acid synthase(FASN)
U32986	Homo sapiens	damage specific DNA binding protein 1(DDB1)
AK122591	Homo sapiens	phospholipase C eta 2(PLCH2)
BC069350	Homo sapiens	6-phosphofructo-2-kinase/fructose-2,6-biphosphatase 2(PFKFB2)
BC035125	Homo sapiens	cannabinoid receptor interacting protein 1(CNRIP1)
BX537955	Homo sapiens	tripartite motif containing 37(TRIM37)
BC037783	Homo sapiens	Alu-mediated CDKN1A/p21 transcriptional regulator(APTR)
KU178531	Homo sapiens	ssemaphorin 4F(SEMA4F)
KX388743	Homo sapiens	MIA SH3 domain ER export factor 2(MIA2)
KU178532	Homo sapiens	ssemaphorin 4F(SEMA4F)
AK298860	Homo sapiens	DnaJ heat shock protein family (Hsp40) member C7(DNAJC7)
KU178533	Homo sapiens	ssemaphorin 4F(SEMA4F)
BC137176	Homo sapiens	dedicator of cytokinesis 5(DOCK5)
BC104247	Homo sapiens	glycophorin C (Gerbich blood group)(GYPC)
BC104246	Homo sapiens	glycophorin C (Gerbich blood group)(GYPC)
AK310152	Homo sapiens	HEN methyltransferase 1(HENMT1)
BC010646	Homo sapiens	calmodulin regulated spectrin associated protein 1(CAMSAP1)
BC004882	Homo sapiens	RNA polymerase I subunit B(POLR1B)
AK303862	Homo sapiens	cytochrome P450 family 1 subfamily B member 1(CYP1B1)
BC137175	Homo sapiens	dedicator of cytokinesis 5(DOCK5)
M67466	Homo sapiens	hydroxy-delta-5-steroid dehydrogenase, 3 beta- and steroid delta-isomerase 2(HSD3B2)
X53742	Homo sapiens	fibulin 1(FBLN1)
X53741	Homo sapiens	fibulin 1(FBLN1)
D50931	Homo sapiens	DAP3 binding cell death enhancer 1(DELE1)
BC017282	Homo sapiens	mediator complex subunit 16(MED16)
BC031574	Homo sapiens	mitogen-activated protein kinase 14(MAPK14)
BC017286	Homo sapiens	family with sequence similarity 32 member A(FAM32A)
AK225806	Homo sapiens	zinc finger protein 451(ZNF451)
BC007909	Homo sapiens	fatty acid synthase(FASN)
AK126963	Homo sapiens	dynein axonemal light intermediate chain 1(DNALI1)
AK314515	Homo sapiens	protein inhibitor of activated STAT 1(PIAS1)
AK124301	Homo sapiens	IQCH antisense RNA 1(IQCH-AS1)
BC130537	Homo sapiens	MIA SH3 domain ER export factor 2(MIA2)
CR936782	Homo sapiens	HIVEP zinc finger 2(HIVEP2)
AK315845	Homo sapiens	structural maintenance of chromosomes 3(SMC3)
BC007907	Homo sapiens	RAB17, member RAS oncogene family(RAB17)
AK297522	Homo sapiens	glutathione S-transferase omega 2(GSTO2)
BX648079	Homo sapiens	ATPase H+ transporting V1 subunit C1(ATP6V1C1)
BC150139	Homo sapiens	RNA polymerase I subunit B(POLR1B)
AK097094	Homo sapiens	leucine rich repeat and sterile alpha motif containing 1(LRSAM1)
BX648077	Homo sapiens	WD repeat and FYVE domain containing 3(WDFY3)
AK225812	Homo sapiens	sorbin and SH3 domain containing 2(SORBS2)
AK294493	Homo sapiens	damage specific DNA binding protein 1(DDB1)
AK125648	Homo sapiens	OTU deubiquitinase with linear linkage specificity like(OTULINL)
AK225810	Homo sapiens	golgi reassembly stacking protein 2(GORASP2)
BC029275	Homo sapiens	cordon-bleu WH2 repeat protein(COBL)
BC021300	Homo sapiens	stromal interaction molecule 1(STIM1)
BC137184	Homo sapiens	olfactory receptor family 56 subfamily B member 1(OR56B1)
BC137185	Homo sapiens	olfactory receptor family 56 subfamily B member 1(OR56B1)
AK097097	Homo sapiens	kelch domain containing 4(KLHDC4)
CR936799	Homo sapiens	four and a half LIM domains 2(FHL2)
AK090462	Homo sapiens	ATPase H+ transporting accessory protein 1(ATP6AP1)
AK289906	Homo sapiens	TOX high mobility group box family member 2(TOX2)
AK315832	Homo sapiens	guanine monophosphate synthase(GMPS)
AK094828	Homo sapiens	long intergenic non-protein coding RNA 1569(LINC01569)
AK091798	Homo sapiens	uncharacterized LOC440910(LOC440910)
AF230382	Homo sapiens	mediator complex subunit 27(MED27)
CR936796	Homo sapiens	endogenous retrovirus group K member 18 Pol protein-like(LOC105379566)
AK315834	Homo sapiens	guanylate binding protein family member 6(GBP6)
X61382	Homo sapiens	synaptophysin like 1(SYPL1)
AK055223	Homo sapiens	COMM domain containing 2(COMMD2)
BX648043	Homo sapiens	gon-4 like(GON4L)
AK056550	Homo sapiens	RB binding protein 4, chromatin remodeling factor(RBBP4)
AK124328	Homo sapiens	DTW domain containing 2(DTWD2)
AK125659	Homo sapiens	toll like receptor 2(TLR2)
BX648041	Homo sapiens	neural precursor cell expressed, developmentally down-regulated 9(NEDD9)
AK303847	Homo sapiens	golgi reassembly stacking protein 1(GORASP1)
BC096078	Homo sapiens	6-phosphofructo-2-kinase/fructose-2,6-biphosphatase 1(PFKFB1)
AK024921	Homo sapiens	adaptor related protein complex 5 subunit mu 1(AP5M1)
BC096079	Homo sapiens	6-phosphofructo-2-kinase/fructose-2,6-biphosphatase 1(PFKFB1)
Y13115	Homo sapiens	polo like kinase 4(PLK4)
AB014527	Homo sapiens	cytoplasmic linker associated protein 2(CLASP2)
BC003520	Homo sapiens	DDB1 and CUL4 associated factor 10(DCAF10)
AK222759	Homo sapiens	phosphoribosyl pyrophosphate amidotransferase(PPAT)
AK090437	Homo sapiens	RAB11 family interacting protein 1(RAB11FIP1)
AK056557	Homo sapiens	hemicentin 1(HMCN1)
U86813	Homo sapiens	5-hydroxytryptamine receptor 7 pseudogene 1(HTR7P1)
AK090438	Homo sapiens	abhydrolase domain containing 17A, depalmitoylase(ABHD17A)
BC047937	Homo sapiens	mastermind like transcriptional coactivator 1(MAML1)
AK123008	Homo sapiens	zinc finger protein 136(ZNF136)
KU178546	Homo sapiens	A-kinase anchoring protein 10(AKAP10)
AF052180	Homo sapiens	tumor protein p53(TP53)
AJ313480	Homo sapiens	rhomboid like 3(RHBDL3)
AK097074	Homo sapiens	ubiquitin specific peptidase 35(USP35)
X53743	Homo sapiens	fibulin 1(FBLN1)
AK289920	Homo sapiens	exportin 1(XPO1)
AK091770	Homo sapiens	DAAM2 antisense RNA 1(DAAM2-AS1)
AK024911	Homo sapiens	heterogeneous nuclear ribonucleoprotein M(HNRNPM)
AB014516	Homo sapiens	CREB regulated transcription coactivator 1(CRTC1)
KU178547	Homo sapiens	A-kinase anchoring protein 10(AKAP10)
KU178548	Homo sapiens	A-kinase anchoring protein 10(AKAP10)
AK123004	Homo sapiens	microtubule associated serine/threonine kinase like(MASTL)
KU178549	Homo sapiens	A-kinase anchoring protein 10(AKAP10)
AK293189	Homo sapiens	poly(A)-specific ribonuclease(PARN)
AK310129	Homo sapiens	ATPase H+/K+ transporting subunit beta(ATP4B)
AB014512	Homo sapiens	TSPO associated protein 1(TSPOAP1)
AK296241	Homo sapiens	RAD51 paralog D(RAD51D)
AL161985	Homo sapiens	transcription factor binding to IGHM enhancer 3(TFE3)
X56807	Homo sapiens	desmocollin 2(DSC2)
AK302578	Homo sapiens	insulin degrading enzyme(IDE)
AK301249	Homo sapiens	RAD51 paralog D(RAD51D)
BC140778	Homo sapiens	cytoplasmic linker associated protein 2(CLASP2)
AK290942	Homo sapiens	phosphoribosyl pyrophosphate amidotransferase(PPAT)
BC003500	Homo sapiens	YY1 associated protein 1(YY1AP1)
BC140774	Homo sapiens	ATPase plasma membrane Ca2+ transporting 4(ATP2B4)
BC131822	Homo sapiens	kinase insert domain receptor(KDR)
BC140773	Homo sapiens	cell migration inducing hyaluronidase 2(CEMIP2)
BC140770	Homo sapiens	capping protein regulator and myosin 1 linker 1(CARMIL1)
AF290886	Homo sapiens	CD209 molecule(CD209)
U02297	Homo sapiens	selectin P ligand(SELPLG)
AK124343	Homo sapiens	adaptor related protein complex 2 subunit alpha 1(AP2A1)
AL161971	Homo sapiens	syntrophin gamma 1(SNTG1)
BC010693	Homo sapiens	protein-L-isoaspartate (D-aspartate) O-methyltransferase domain containing 1(PCMTD1)
AK056501	Homo sapiens	sphingomyelin phosphodiesterase 4(SMPD4)
AK297562	Homo sapiens	YY1 associated protein 1(YY1AP1)
AK296230	Homo sapiens	regulator of MON1-CCZ1(RMC1)
BC137144	Homo sapiens	FERM domain containing 1(FRMD1)
AF220144	Homo sapiens	tripartite motif containing 34(TRIM34)
AL133040	Homo sapiens	lysine demethylase 5B(KDM5B)
AF220143	Homo sapiens	tripartite motif containing 34(TRIM34)
AL390135	Homo sapiens	ankyrin repeat and SOCS box containing 6(ASB6)
AK022316	Homo sapiens	parvin alpha(PARVA)
BC114479	Homo sapiens	zinc finger protein 571(ZNF571)
CR749635	Homo sapiens	MIB E3 ubiquitin protein ligase 1(MIB1)
M93718	Homo sapiens	nitric oxide synthase 3(NOS3)
AK090420	Homo sapiens	long intergenic non-protein coding RNA 1588(LINC01588)
AB014533	Homo sapiens	cordon-bleu WH2 repeat protein(COBL)
AK090425	Homo sapiens	canopy FGF signaling regulator 3(CNPY3)
BC019038	Homo sapiens	small nuclear RNA activating complex polypeptide 1(SNAPC1)
AF187859	Homo sapiens	HSPA (Hsp70) binding protein 1(HSPBP1)
BC025709	Homo sapiens	aldo-keto reductase family 7 member A3(AKR7A3)
X86681	Homo sapiens	solute carrier family 29 member 2(SLC29A2)
BX648084	Homo sapiens	transmembrane protein 120B(TMEM120B)
BX648081	Homo sapiens	zinc finger protein 451(ZNF451)
AK098351	Homo sapiens	AI894139 pseudogene(LOC155060)
CR749621	Homo sapiens	SNF related kinase(SNRK)
BC019047	Homo sapiens	TNF superfamily member 12(TNFSF12)
CR749620	Homo sapiens	glycogen synthase kinase 3 alpha(GSK3A)
AK056513	Homo sapiens	ring finger protein 145(RNF145)
AB014569	Homo sapiens	TSC22 domain family member 2(TSC22D2)
AK124364	Homo sapiens	activating signal cointegrator 1 complex subunit 1(ASCC1)
AK124365	Homo sapiens	plasminogen like B2(PLGLB2)
AK125696	Homo sapiens	capping protein regulator and myosin 1 linker 1(CARMIL1)
HQ317451	Homo sapiens	stromal interaction molecule 1(STIM1)
M81768	Homo sapiens	solute carrier family 9 member A1(SLC9A1)
AL833051	Homo sapiens	TMCC1 divergent transcript(TMCC1-DT)
BX648097	Homo sapiens	GIT ArfGAP 1(GIT1)
BC106878	Homo sapiens	striatin(STRN)
AK301211	Homo sapiens	enoyl-CoA hydratase 1(ECH1)
BC013746	Homo sapiens	glutamine and serine rich 1(QSER1)
AK302546	Homo sapiens	forty-two-three domain containing 1(FYTTD1)
BC139781	Homo sapiens	ecto-NOX disulfide-thiol exchanger 2(ENOX2)
CR936733	Homo sapiens	NDRG family member 4(NDRG4)
U06641	Homo sapiens	UDP glucuronosyltransferase family 2 member B15(UGT2B15)
BC001771	Homo sapiens	general transcription factor IIF subunit 2(GTF2F2)
AF525782	Homo sapiens	DLG2 antisense RNA 1(DLG2-AS1)
AF452248	Homo sapiens	solute carrier family 4 member 5(SLC4A5)
AL833044	Homo sapiens	STEAP4 metalloreductase(STEAP4)
X97335	Homo sapiens	A-kinase anchoring protein 1(AKAP1)
AK057859	Homo sapiens	brain expressed X-linked 3(BEX3)
AK309188	Homo sapiens	prostaglandin reductase 2(PTGR2)
AK057858	Homo sapiens	NAPA antisense RNA 1(NAPA-AS1)
AK290950	Homo sapiens	hydroxy-delta-5-steroid dehydrogenase, 3 beta- and steroid delta-isomerase 7(HSD3B7)
AK127400	Homo sapiens	uncharacterized LOC100130256(LOC100130256)
AB209578	Homo sapiens	cilia and flagella associated protein 410(CFAP410)
AB040880	Homo sapiens	BAH domain and coiled-coil containing 1(BAHCC1)
AK128629	Homo sapiens	pseudouridine synthase 7(PUS7)
AK289992	Homo sapiens	NUAK family kinase 1(NUAK1)
CR936827	Homo sapiens	mannosidase endo-alpha(MANEA)
AL833834	Homo sapiens	synaptotagmin 12(SYT12)
AB006972	Homo sapiens	polo like kinase 4(PLK4)
AK094898	Homo sapiens	transmembrane channel like 6(TMC6)
AK303909	Homo sapiens	solute carrier family 13 member 2(SLC13A2)
CR749567	Homo sapiens	DnaJ heat shock protein family (Hsp40) member C16(DNAJC16)
M21188	Homo sapiens	insulin degrading enzyme(IDE)
CR749563	Homo sapiens	cAMP responsive element binding protein 3 like 2(CREB3L2)
BC171803	Homo sapiens	dysferlin(DYSF)
AK097926	Homo sapiens	target of myb1 membrane trafficking protein(TOM1)
BC014297	Homo sapiens	F-box and WD repeat domain containing 5(FBXW5)
BC128187	Homo sapiens	long intergenic non-protein coding RNA 319(LINC00319)
AK128620	Homo sapiens	monoacylglycerol O-acyltransferase 2(MOGAT2)
AL353941	Homo sapiens	endosomal transmembrane epsin interactor 3(ENTREP3)
AB051529	Homo sapiens	dispatched RND transporter family member 2(DISP2)
AK296272	Homo sapiens	otoferlin(OTOF)
U26209	Homo sapiens	solute carrier family 13 member 2(SLC13A2)
AK000100	Homo sapiens	ankyrin repeat domain 10(ANKRD10)
AK289981	Homo sapiens	ataxin 2 like(ATXN2L)
AK001430	Homo sapiens	kelch like family member 20(KLHL20)
BC116180	Homo sapiens	collagen type XXIV alpha 1 chain(COL24A1)
AK289985	Homo sapiens	contactin 2(CNTN2)
L44577	Homo sapiens	presenilin 2(PSEN2)
AB209584	Homo sapiens	formin homology 2 domain containing 1(FHOD1)
FJ235526	Homo sapiens	outer dense fiber of sperm tails 4(ODF4)
AK096602	Homo sapiens	immunoglobulin superfamily containing leucine rich repeat 2(ISLR2)
CR936830	Homo sapiens	NBPF member 19(NBPF19)
CR456919	Homo sapiens	nudix hydrolase 21(NUDT21)
AK128639	Homo sapiens	protein kinase cAMP-dependent type II regulatory subunit beta(PRKAR2B)
AJ005015	Homo sapiens	structural maintenance of chromosomes 3(SMC3)
AK290979	Homo sapiens	zinc finger protein 77(ZNF77)
AK127304	Homo sapiens	ubiquitin conjugating enzyme E2 D3(UBE2D3)
BC053873	Homo sapiens	WW and C2 domain containing 2(WWC2)
BC018660	Homo sapiens	2-aminoethanethiol dioxygenase(ADO)
AK127301	Homo sapiens	microtubule associated monooxygenase, calponin and LIM domain containing 2(MICAL2)
AF058319	Homo sapiens	solute carrier family 23 member 2(SLC23A2)
CR533550	Homo sapiens	sphingomyelin phosphodiesterase 4(SMPD4)
AK124283	Homo sapiens	spermatogenesis associated 41(SPATA41)
AK130973	Homo sapiens	endonuclease G(ENDOG)
D43770	Homo sapiens	long intergenic non-protein coding RNA 1152(LINC01152)
AB051511	Homo sapiens	selenoprotein I(SELENOI)
BC016010	Homo sapiens	transmembrane protein 18(TMEM18)
AL136925	Homo sapiens	adaptor related protein complex 2 subunit alpha 1(AP2A1)
AB051512	Homo sapiens	slingshot protein phosphatase 2(SSH2)
BC130478	Homo sapiens	glucose-6-phosphatase catalytic subunit 1(G6PC1)
AL136922	Homo sapiens	caseinolytic mitochondrial matrix peptidase chaperone subunit X(CLPX)
AK299338	Homo sapiens	DLG associated protein 5(DLGAP5)
AB051514	Homo sapiens	FH2 domain containing 1(FHDC1)
AK128654	Homo sapiens	zinc finger protein 648(ZNF648)
BC003596	Homo sapiens	tumor protein p53(TP53)
AK128659	Homo sapiens	eukaryotic translation initiation factor 2 alpha kinase 3(EIF2AK3)
AK127327	Homo sapiens	CDC14 cell division cycle 14 C-like(CDC14BL)
AK298020	Homo sapiens	golgi reassembly stacking protein 2(GORASP2)
AK302611	Homo sapiens	protein phosphatase 6 regulatory subunit 3(PPP6R3)
AF059663	Homo sapiens	solute carrier family 22 member 18(SLC22A18)
AK026768	Homo sapiens	DPY19L1 pseudogene 1(DPY19L1P1)
AK303944	Homo sapiens	YY1 associated protein 1(YY1AP1)
U90942	Homo sapiens	myosin VA(MYO5A)
BC031659	Homo sapiens	mannosidase alpha class 2A member 1(MAN2A1)
AK024109	Homo sapiens	Ras suppressor protein 1(RSU1)
AF502291	Homo sapiens	toll like receptor 2(TLR2)
U89942	Homo sapiens	lysyl oxidase like 2(LOXL2)
AY072810	Homo sapiens	solute carrier family 13 member 3(SLC13A3)
L11696	Homo sapiens	solute carrier family 3 member 1(SLC3A1)
BC016034	Homo sapiens	rhomboid 5 homolog 2(RHBDF2)
LC570272	Homo sapiens	Rh associated glycoprotein(RHAG)
BC016033	Homo sapiens	tRNA methyltransferase 61A(TRMT61A)
AK311559	Homo sapiens	RAP1B, member of RAS oncogene family(RAP1B)
AB209541	Homo sapiens	toll interacting protein(TOLLIP)
AB073779	Homo sapiens	transporter 2, ATP binding cassette subfamily B member(TAP2)
AK299344	Homo sapiens	PH domain containing endocytic trafficking adaptor 1(PHETA1)
BC028021	Homo sapiens	FCH and mu domain containing endocytic adaptor 1(FCHO1)
M92357	Homo sapiens	TNF alpha induced protein 2(TNFAIP2)
BC028017	Homo sapiens	translocase of inner mitochondrial membrane 17B(TIMM17B)
BC031667	Homo sapiens	p21 (RAC1) activated kinase 2(PAK2)
AK093539	Homo sapiens	ankyrin repeat and SOCS box containing 6(ASB6)
BC110833	Homo sapiens	RNA polymerase I subunit B(POLR1B)
D31764	Homo sapiens	sorting nexin 17(SNX17)
AK094867	Homo sapiens	copine 2(CPNE2)
AK128673	Homo sapiens	GPR107 adjacent cis regulating lncRNA(GPRACR)
BC031660	Homo sapiens	chromosome 3 open reading frame 80(C3orf80)
BX648830	Homo sapiens	mediator complex subunit 28(MED28)
M84748	Homo sapiens	transporter 2, ATP binding cassette subfamily B member(TAP2)
BC041004	Homo sapiens	F-box protein 7(FBXO7)
AK303924	Homo sapiens	uroplakin 1B(UPK1B)
BC064563	Homo sapiens	solute carrier family 37 member 4(SLC37A4)
AB209551	Homo sapiens	spectrin beta, non-erythrocytic 1(SPTBN1)
AK128687	Homo sapiens	Pvt1 oncogene(PVT1)
AK126023	Homo sapiens	glutamine and serine rich 1(QSER1)
AY550971	Homo sapiens	phospholipid scramblase 4(PLSCR4)
AK090471	Homo sapiens	protein phosphatase 1 regulatory subunit 16A(PPP1R16A)
AY550975	Homo sapiens	calpain 1(CAPN1)
BC004897	Homo sapiens	carbonic anhydrase 3(CA3)
BX648802	Homo sapiens	gon-4 like(GON4L)
BC125098	Homo sapiens	NADPH oxidase 5(NOX5)
BC017382	Homo sapiens	ubiquitin specific peptidase 53(USP53)
BC125097	Homo sapiens	NADPH oxidase 5(NOX5)
AY046562	Homo sapiens	methylenetetrahydrofolate reductase(MTHFR)
AY046561	Homo sapiens	methylenetetrahydrofolate reductase(MTHFR)
BC143745	Homo sapiens	inhibitor of Bruton tyrosine kinase(IBTK)
AK298030	Homo sapiens	phosphate regulating endopeptidase homolog X-linked(PHEX)
AF057034	Homo sapiens	retinol dehydrogenase 16(RDH16)
BC028042	Homo sapiens	immunoglobulin superfamily containing leucine rich repeat 2(ISLR2)
BC063242	Homo sapiens	fatty acid synthase(FASN)
AY046563	Homo sapiens	methylenetetrahydrofolate reductase(MTHFR)
AF115403	Homo sapiens	E74 like ETS transcription factor 5(ELF5)
AF115402	Homo sapiens	E74 like ETS transcription factor 5(ELF5)
AB040898	Homo sapiens	immunoglobulin superfamily containing leucine rich repeat 2(ISLR2)
BC034716	Homo sapiens	negative regulator of ubiquitin like proteins 1(NUB1)
AK001458	Homo sapiens	succinate-CoA ligase ADP-forming subunit beta(SUCLA2)
BC131774	Homo sapiens	zinc finger and BTB domain containing 4(ZBTB4)
BC130442	Homo sapiens	chromosome 5 open reading frame 60(C5orf60)
BC003552	Homo sapiens	calnexin(CANX)
D50926	Homo sapiens	MORC family CW-type zinc finger 3(MORC3)
BC130444	Homo sapiens	chromosome 5 open reading frame 60(C5orf60)
AJ005036	Homo sapiens	phosphodiesterase 3A(PDE3A)
AB051542	Homo sapiens	KIAA1755(KIAA1755)
AK090489	Homo sapiens	trafficking protein particle complex subunit 11(TRAPPC11)
BC110855	Homo sapiens	glutamine rich 1(QRICH1)
AK126039	Homo sapiens	uncharacterized LOC100128002(LOC100128002)
BC130449	Homo sapiens	protein phosphatase 1 regulatory subunit 9A(PPP1R9A)
AK094848	Homo sapiens	transforming acidic coiled-coil containing protein 2(TACC2)
KM201104	Homo sapiens	semaphorin 6D(SEMA6D)
BC144269	Homo sapiens	ataxin 2 like(ATXN2L)
X59960	Homo sapiens	sphingomyelin phosphodiesterase 1(SMPD1)
AK025475	Homo sapiens	ankyrin repeat and IBR domain containing 1(ANKIB1)
M73239	Homo sapiens	hepatocyte growth factor(HGF)
CR933717	Homo sapiens	ankyrin repeat and FYVE domain containing 1(ANKFY1)
AK024148	Homo sapiens	protein phosphatase 6 regulatory subunit 2(PPP6R2)
AK095347	Homo sapiens	long intergenic non-protein coding RNA 668(LINC00668)
AF041378	Homo sapiens	cell death inducing DFFA like effector a(CIDEA)
X81882	Homo sapiens	cullin 5(CUL5)
GU931819	Homo sapiens	chromosome 20 open reading frame 203(C20orf203)
AY429109	Homo sapiens	prostaglandin E receptor 4(PTGER4)
BC093023	Homo sapiens	MORN repeat containing 4(MORN4)
AK315049	Homo sapiens	YY1 associated protein 1(YY1AP1)
AY148488	Homo sapiens	sodium voltage-gated channel alpha subunit 5(SCN5A)
JN214348	Homo sapiens	tumor protein p53(TP53)
AK303071	Homo sapiens	glycoprotein nmb(GPNMB)
BC144274	Homo sapiens	chromosome 5 open reading frame 60(C5orf60)
BC035133	Homo sapiens	leucine rich repeat neuronal 3(LRRN3)
BX648872	Homo sapiens	proline rich 27(PRR27)
M73240	Homo sapiens	hepatocyte growth factor(HGF)
BC014214	Homo sapiens	adaptor related protein complex 2 subunit alpha 1(AP2A1)
GU931820	Homo sapiens	chromosome 20 open reading frame 203(C20orf203)
BC037798	Homo sapiens	tubulin polymerization promoting protein family member 3(TPPP3)
BC103708	Homo sapiens	zinc finger protein 761(ZNF761)
BC103709	Homo sapiens	asteroid homolog 1(ASTE1)
AK095350	Homo sapiens	ADP ribosylation factor like GTPase 17B(ARL17B)
AK095350	Homo sapiens	ADP ribosylation factor like GTPase 17A(ARL17A)
BC009761	Homo sapiens	WD repeat domain 24(WDR24)
AK308748	Homo sapiens	uncharaterized LOC112694756(LOC112694756)
AK126057	Homo sapiens	WW and C2 domain containing 2(WWC2)
BC136647	Homo sapiens	tectonin beta-propeller repeat containing 2(TECPR2)
AK095355	Homo sapiens	long intergenic non-protein coding RNA 319(LINC00319)
AK304391	Homo sapiens	basic, immunoglobulin-like variable motif containing(BIVM)
DQ191317	Homo sapiens	tumor protein p53(TP53)
BC144262	Homo sapiens	PTPRF interacting protein alpha 4(PPFIA4)
BC035162	Homo sapiens	ATPase phospholipid transporting 8B3(ATP8B3)
AK303046	Homo sapiens	YY1 associated protein 1(YY1AP1)
BC036490	Homo sapiens	RNA, 7SL, cytoplasmic 832, pseudogene(RN7SL832P)
AK096650	Homo sapiens	transmembrane protein 231(TMEM231)
AK097981	Homo sapiens	FYVE, RhoGEF and PH domain containing 2(FGD2)
X16896	Homo sapiens	interleukin 1 receptor type 1(IL1R1)
AK000156	Homo sapiens	Dmx like 2(DMXL2)
AK057083	Homo sapiens	progestin and adipoQ receptor family member 8(PAQR8)
AK074428	Homo sapiens	solute carrier family 43 member 2(SLC43A2)
AK092297	Homo sapiens	immunoglobulin superfamily containing leucine rich repeat 2(ISLR2)
AY823162	Homo sapiens	ATPase 13A4(ATP13A4)
AK315020	Homo sapiens	poly(A)-specific ribonuclease(PARN)
AK316357	Homo sapiens	serine incorporator 2(SERINC2)
BC069385	Homo sapiens	6-phosphofructo-2-kinase/fructose-2,6-biphosphatase 2(PFKFB2)
AL389982	Homo sapiens	protein phosphatase 6 regulatory subunit 3(PPP6R3)
BC062748	Homo sapiens	EF-hand calcium binding domain 10(EFCAB10)
BC036489	Homo sapiens	PNMA family member 2(PNMA2)
BC035176	Homo sapiens	uncharacterized LOC101928401(LOC101928401)
AK303032	Homo sapiens	damage specific DNA binding protein 1(DDB1)
BC035174	Homo sapiens	long intergenic non-protein coding RNA 1096(LINC01096)
BC041836	Homo sapiens	long intergenic non-protein coding RNA 2225(LINC02225)
BC039518	Homo sapiens	uncharacterized LOC105373418(LOC105373418)
BC068058	Homo sapiens	OTU deubiquitinase, ubiquitin aldehyde binding 2(OTUB2)
L02750	Homo sapiens	potassium voltage-gated channel subfamily A member 1(KCNA1)
AK097993	Homo sapiens	DC-STAMP domain containing 2(DCST2)
AK298070	Homo sapiens	solute carrier family 41 member 3(SLC41A3)
BC115703	Homo sapiens	gon-4 like(GON4L)
M36284	Homo sapiens	glycophorin C (Gerbich blood group)(GYPC)
AF151902	Homo sapiens	family with sequence similarity 32 member A(FAM32A)
BC005379	Homo sapiens	plasminogen like B2(PLGLB2)
AY038064	Homo sapiens	sodium voltage-gated channel alpha subunit 5(SCN5A)
BC074733	Homo sapiens	gastrin releasing peptide receptor(GRPR)
AK291441	Homo sapiens	protein kinase cAMP-dependent type II regulatory subunit beta(PRKAR2B)
BX648851	Homo sapiens	dynein axonemal intermediate chain 3(DNAI3)
BC015571	Homo sapiens	solute carrier family 22 member 18(SLC22A18)
AK223146	Homo sapiens	solute carrier family 3 member 1(SLC3A1)
AB040046	Homo sapiens	USH1 protein network component harmonin binding protein 1(USHBP1)
BC040538	Homo sapiens	family with sequence similarity 177 member A1(FAM177A1)
BC040535	Homo sapiens	transmembrane and coiled-coil domain family 3(TMCC3)
AK131442	Homo sapiens	DEAD-box helicase 55(DDX55)
AF187064	Homo sapiens	brain expressed X-linked 3(BEX3)
BC053841	Homo sapiens	long intergenic non-protein coding RNA 265(LINC00265)
AK096630	Homo sapiens	solute carrier family 2 member 6(SLC2A6)
AK300838	Homo sapiens	WD repeat domain 61(WDR61)
AK315089	Homo sapiens	BTG3 associated nuclear protein(BANP)
AJ438952	Homo sapiens	ASXL transcriptional regulator 1(ASXL1)
AL833872	Homo sapiens	PEAK1 related, kinase-activating pseudokinase 1(PRAG1)
BC015585	Homo sapiens	cAMP responsive element binding protein 3 like 2(CREB3L2)
BC014253	Homo sapiens	Yip1 domain family member 5(YIPF5)
AK312810	Homo sapiens	insulin degrading enzyme(IDE)
AK024175	Homo sapiens	programmed cell death 6(PDCD6)
BC064518	Homo sapiens	CD40 molecule(CD40)
AK312809	Homo sapiens	phospholipid scramblase 4(PLSCR4)
BC040524	Homo sapiens	zinc finger and SCAN domain containing 12 pseudogene 1(ZSCAN12P1)
AJ271880	Homo sapiens	calnexin(CANX)
AK027202	Homo sapiens	golgi reassembly stacking protein 2(GORASP2)
AK092286	Homo sapiens	lipoprotein lipase(LPL)
AL832532	Homo sapiens	3-hydroxyacyl-CoA dehydratase 2(HACD2)
AJ437636	Homo sapiens	phosphatidylinositol-3,4,5-trisphosphate dependent Rac exchange factor 2(PREX2)
AK097975	Homo sapiens	heterogeneous nuclear ribonucleoprotein L(HNRNPL)
AF121228	Homo sapiens	mediator complex subunit 16(MED16)
AY358316	Homo sapiens	immunoglobulin superfamily containing leucine rich repeat 2(ISLR2)
AJ583024	Homo sapiens	isthmin 2(ISM2)
BC020938	Homo sapiens	synaptophysin like 1(SYPL1)
BC146862	Homo sapiens	carboxypeptidase X, M14 family member 2(CPXM2)
M11802	Homo sapiens	glycophorin C (Gerbich blood group)(GYPC)
BX647550	Homo sapiens	transmembrane protein 215(TMEM215)
AF154121	Homo sapiens	solute carrier family 13 member 3(SLC13A3)
AF113615	Homo sapiens	formin homology 2 domain containing 1(FHOD1)
DQ413001	Homo sapiens	NADPH oxidase 5(NOX5)
U67780	Homo sapiens	neuropeptide Y receptor Y6 (pseudogene)(NPY6R)
AK000198	Homo sapiens	xylosyltransferase 1(XYLT1)
AK130131	Homo sapiens	syndecan 2(SDC2)
AK057041	Homo sapiens	solute carrier family 29 member 2(SLC29A2)
AK024167	Homo sapiens	keratinocyte associated protein 2(KRTCAP2)
AK057043	Homo sapiens	golgi reassembly stacking protein 1(GORASP1)
X12496	Homo sapiens	glycophorin C (Gerbich blood group)(GYPC)
BC062783	Homo sapiens	maternally expressed 3(MEG3)
AB020412	Homo sapiens	RAD51 paralog D(RAD51D)
BX640924	Homo sapiens	proline rich 27(PRR27)
BX640923	Homo sapiens	MDM4 regulator of p53(MDM4)
AL833853	Homo sapiens	cell death inducing p53 target 1(CDIP1)
AF145204	Homo sapiens	ankyrin repeat and sterile alpha motif domain containing 1B(ANKS1B)
AF199023	Homo sapiens	phospholipid scramblase 4(PLSCR4)
BX648893	Homo sapiens	Sad1 and UNC84 domain containing 1(SUN1)
AK223133	Homo sapiens	solute carrier family 12 member 3(SLC12A3)
X91220	Homo sapiens	solute carrier family 12 member 3(SLC12A3)
BC020953	Homo sapiens	protein phosphatase 6 regulatory subunit 3(PPP6R3)
AK025488	Homo sapiens	syndecan 2(SDC2)
BC146858	Homo sapiens	PRAME family member 17(PRAMEF17)
AY605659	Homo sapiens	spermatogenesis associated 41(SPATA41)
BC027587	Homo sapiens	succinate-CoA ligase ADP-forming subunit beta(SUCLA2)
AK130125	Homo sapiens	ATPase 13A1(ATP13A1)
AK300806	Homo sapiens	fibulin 1(FBLN1)
M85201	Homo sapiens	carboxyl ester lipase(CEL)
BX647568	Homo sapiens	TATA-box binding protein associated factor 11(TAF11)
BX648895	Homo sapiens	proline rich 27(PRR27)
AK295840	Homo sapiens	zinc finger protein 765(ZNF765)
BX648896	Homo sapiens	proline rich 27(PRR27)
BC101019	Homo sapiens	isthmin 2(ISM2)
X89894	Homo sapiens	nuclear receptor subfamily 4 group A member 3(NR4A3)
AF188239	Homo sapiens	transmembrane protein 8B(TMEM8B)
X64594	Homo sapiens	Rh associated glycoprotein(RHAG)
BC021259	Homo sapiens	tripartite motif containing 65(TRIM65)
AK131362	Homo sapiens	nucleolar protein with MIF4G domain 1(NOM1)
AK304435	Homo sapiens	ring finger protein 145(RNF145)
BX640869	Homo sapiens	mannosidase endo-alpha(MANEA)
BX640866	Homo sapiens	Sad1 and UNC84 domain containing 1(SUN1)
BC051900	Homo sapiens	opsin 3(OPN3)
BC101022	Homo sapiens	isthmin 2(ISM2)
BC092453	Homo sapiens	immunoglobulin kappa constant(IGKC)
AK298904	Homo sapiens	YY1 associated protein 1(YY1AP1)
BC101021	Homo sapiens	isthmin 2(ISM2)
BC127653	Homo sapiens	sterile alpha motif domain containing 3(SAMD3)
BC101020	Homo sapiens	isthmin 2(ISM2)
AK294545	Homo sapiens	UPF3A regulator of nonsense mediated mRNA decay(UPF3A)
AL137569	Homo sapiens	long intergenic non-protein coding RNA 899(LINC00899)
AK304420	Homo sapiens	calnexin(CANX)
BC127654	Homo sapiens	sterile alpha motif domain containing 3(SAMD3)
BC127655	Homo sapiens	ATP binding cassette subfamily C member 3(ABCC3)
AK098224	Homo sapiens	component of oligomeric golgi complex 1(COG1)
AK131356	Homo sapiens	guanylate binding protein family member 6(GBP6)
AF312024	Homo sapiens	cadherin related 23(CDH23)
AK313376	Homo sapiens	solute carrier family 39 member 11(SLC39A11)
AK098227	Homo sapiens	forkhead box P4(FOXP4)
BC042191	Homo sapiens	deltex E3 ubiquitin ligase 3L(DTX3L)
AK075566	Homo sapiens	fibulin 1(FBLN1)
AB102890	Homo sapiens	thrombopoietin(THPO)
AK316407	Homo sapiens	insulin degrading enzyme(IDE)
BC014984	Homo sapiens	small nuclear RNA activating complex polypeptide 1(SNAPC1)
AF053305	Homo sapiens	BUB1 mitotic checkpoint serine/threonine kinase(BUB1)
AF075575	Homo sapiens	dysferlin(DYSF)
AK054651	Homo sapiens	DnaJ heat shock protein family (Hsp40) member C21(DNAJC21)
AK300057	Homo sapiens	selectin P ligand(SELPLG)
BC136584	Homo sapiens	ataxin 2 like(ATXN2L)
AK301388	Homo sapiens	asteroid homolog 1(ASTE1)
AK074263	Homo sapiens	cytokine induced apoptosis inhibitor 1(CIAPIN1)
U79569	Homo sapiens	cleavage and polyadenylation specific factor 4(CPSF4)
MK336171	Homo sapiens	DLGAP1 antisense RNA 2(DLGAP1-AS2)
AF246665	Homo sapiens	BCL2 like 13(BCL2L13)
AK130056	Homo sapiens	zinc finger and BTB domain containing 45(ZBTB45)
BC002950	Homo sapiens	regulator of MON1-CCZ1(RMC1)
BC021283	Homo sapiens	AF4/FMR2 family member 3(AFF3)
AB011538	Homo sapiens	slit guidance ligand 3(SLIT3)
AK312032	Homo sapiens	glycophorin C (Gerbich blood group)(GYPC)
BC024304	Homo sapiens	SEPT5-GP1BB readthrough(SEPT5-GP1BB)
BC002951	Homo sapiens	SEC61 translocon subunit alpha 1(SEC61A1)
AL834222	Homo sapiens	dynein heavy chain domain 1(DNHD1)
BX647478	Homo sapiens	casein kinase 1 alpha 1(CSNK1A1)
AK293236	Homo sapiens	nuclear export mediator factor(NEMF)
BC014995	Homo sapiens	roundabout guidance receptor 4(ROBO4)
BC078142	Homo sapiens	ventricular zone expressed PH domain containing 1(VEPH1)
AL080120	Homo sapiens	teneurin transmembrane protein 4(TENM4)
AB158469	Homo sapiens	sodium voltage-gated channel alpha subunit 5(SCN5A)
AB158470	Homo sapiens	sodium voltage-gated channel alpha subunit 5(SCN5A)
AF198488	Homo sapiens	transcription factor CP2 like 1(TFCP2L1)
BC060858	Homo sapiens	suppressor of cytokine signaling 3(SOCS3)
Y15801	Homo sapiens	protein kinase Y-linked (pseudogene)(PRKY)
AK314684	Homo sapiens	solute carrier family 13 member 2(SLC13A2)
AY424286	Homo sapiens	progestin and adipoQ receptor family member 8(PAQR8)
AK314689	Homo sapiens	NADPH oxidase 5(NOX5)
AK225759	Homo sapiens	dynein cytoplasmic 1 intermediate chain 2(DYNC1I2)
DQ448593	Homo sapiens	TATA-box binding protein like 2(TBPL2)
AF439325	Homo sapiens	interferon lambda receptor 1(IFNLR1)
BC002932	Homo sapiens	centriolin(CNTRL)
Y18024	Homo sapiens	inositol-trisphosphate 3-kinase B(ITPKB)
AF237762	Homo sapiens	G protein-coupled receptor 84(GPR84)
AK316458	Homo sapiens	FCH and mu domain containing endocytic adaptor 1(FCHO1)
JX088243	Homo sapiens	HELLP associated long non-coding RNA(HELLPAR)
M74491	Homo sapiens	ADP ribosylation factor 3(ARF3)
AY775731	Homo sapiens	olfactory receptor family 51 subfamily E member 1(OR51E1)
BC104952	Homo sapiens	ATP binding cassette subfamily C member 3(ABCC3)
BC104954	Homo sapiens	SPHK1 interactor, AKAP domain containing(SPHKAP)
BC104956	Homo sapiens	SPHK1 interactor, AKAP domain containing(SPHKAP)
AJ131730	Homo sapiens	potassium voltage-gated channel interacting protein 3(KCNIP3)
AK123780	Homo sapiens	ATPase 13A1(ATP13A1)
AJ586139	Homo sapiens	ubiquitin specific peptidase 49(USP49)
BC071567	Homo sapiens	SNF related kinase(SNRK)
AK297606	Homo sapiens	GRAM domain containing 1B(GRAMD1B)
AF140242	Homo sapiens	opsin 3(OPN3)
BC096840	Homo sapiens	histamine receptor H3(HRH3)
BC036311	Homo sapiens	DMXL1 divergent transcript(DMXL1-DT)
AK055933	Homo sapiens	uncharacterized LOC153910(LOC153910)
BC002926	Homo sapiens	DDB1 and CUL4 associated factor 15(DCAF15)
BC036331	Homo sapiens	tubulin tyrosine ligase(TTL)
BC144167	Homo sapiens	mitoguardin 1(MIGA1)
BC078174	Homo sapiens	AMMECR1 like(AMMECR1L)
AK126825	Homo sapiens	NFKB inhibitor delta(NFKBID)
CR627234	Homo sapiens	adhesion G protein-coupled receptor F1(ADGRF1)
BC069211	Homo sapiens	ATPase 13A1(ATP13A1)
AK308812	Homo sapiens	fibroblast growth factor 11(FGF11)
BC069217	Homo sapiens	neuroligin 2(NLGN2)
CR936689	Homo sapiens	cordon-bleu WH2 repeat protein(COBL)
BX640885	Homo sapiens	protein-L-isoaspartate (D-aspartate) O-methyltransferase domain containing 1(PCMTD1)
AK054619	Homo sapiens	NOP14 antisense RNA 1(NOP14-AS1)
CR936688	Homo sapiens	mediator complex subunit 28(MED28)
AF173154	Homo sapiens	hyaluronidase 1(HYAL1)
AK123793	Homo sapiens	syntaxin binding protein 4(STXBP4)
AK296304	Homo sapiens	solute carrier family 23 member 2(SLC23A2)
GQ183503	Homo sapiens	maternally expressed 3(MEG3)
GQ183501	Homo sapiens	maternally expressed 3(MEG3)
GQ183502	Homo sapiens	maternally expressed 3(MEG3)
GQ183500	Homo sapiens	maternally expressed 3(MEG3)
BC104974	Homo sapiens	helicase with zinc finger 2(HELZ2)
U10860	Homo sapiens	guanine monophosphate synthase(GMPS)
BC048302	Homo sapiens	solute carrier family 35 member F2(SLC35F2)
BC005183	Homo sapiens	transcription factor B1, mitochondrial(TFB1M)
AK074219	Homo sapiens	DEAD-box helicase 55(DDX55)
AK054629	Homo sapiens	dynein axonemal intermediate chain 3(DNAI3)
AY576779	Homo sapiens	nucleolar protein with MIF4G domain 1(NOM1)
U49730	Homo sapiens	BCL2 interacting killer(BIK)
AK298958	Homo sapiens	transient receptor potential cation channel subfamily C member 4 associated protein(TRPC4AP)
BC035005	Homo sapiens	cap methyltransferase 2(CMTR2)
AK054628	Homo sapiens	long intergenic non-protein coding RNA 887(LINC00887)
BX640892	Homo sapiens	proline rich 27(PRR27)
BC096821	Homo sapiens	beta-1,4-galactosyltransferase 2(B4GALT2)
AK098291	Homo sapiens	mitochondrial ribosomal protein S16(MRPS16)
M60718	Homo sapiens	hepatocyte growth factor(HGF)
AK126847	Homo sapiens	cyclin and CBS domain divalent metal cation transport mediator 3(CNNM3)
AK125517	Homo sapiens	ankyrin repeat domain 33(ANKRD33)
L40027	Homo sapiens	glycogen synthase kinase 3 alpha(GSK3A)
AK303987	Homo sapiens	guanylate binding protein family member 6(GBP6)
AF064019	Homo sapiens	DNA fragmentation factor subunit beta(DFFB)
BC035810	Homo sapiens	glycosylphosphatidylinositol anchored high density lipoprotein binding protein 1(GPIHBP1)
AJ628446	Homo sapiens	RAP1 GTPase activating protein 2(RAP1GAP2)
AY078178	Homo sapiens	solute carrier family 35 member F2(SLC35F2)
BC032783	Homo sapiens	glycoprotein nmb(GPNMB)
AF037439	Homo sapiens	A-kinase anchoring protein 10(AKAP10)
AK125510	Homo sapiens	RUSC1 antisense RNA 1(RUSC1-AS1)
AJ628447	Homo sapiens	RAP1 GTPase activating protein 2(RAP1GAP2)
BC043435	Homo sapiens	chromosome 5 open reading frame 60(C5orf60)
BC022516	Homo sapiens	arrestin domain containing 2(ARRDC2)
BC044767	Homo sapiens	ring finger protein 145(RNF145)
KU178402	Homo sapiens	zinc finger protein 213(ZNF213)
MG828508	Homo sapiens	uncharacterized LOC124903164(LOC124903164)
AK056420	Homo sapiens	ATPase 13A1(ATP13A1)
KU178403	Homo sapiens	zinc finger protein 213(ZNF213)
BC044763	Homo sapiens	poly(A)-specific ribonuclease(PARN)
U94319	Homo sapiens	PC4 and SFRS1 interacting protein 1(PSIP1)
AB040912	Homo sapiens	semaphorin 6D(SEMA6D)
AK303977	Homo sapiens	secreted frizzled related protein 4(SFRP4)
AK091671	Homo sapiens	solute carrier family 41 member 3(SLC41A3)
BC035829	Homo sapiens	rhomboid 5 homolog 2(RHBDF2)
BC017171	Homo sapiens	valosin containing protein(VCP)
CR749710	Homo sapiens	TBC1 domain family member 22B(TBC1D22B)
BC125088	Homo sapiens	TBC1 domain family member 25(TBC1D25)
AK315954	Homo sapiens	ankyrin repeat and sterile alpha motif domain containing 1B(ANKS1B)
BC030133	Homo sapiens	syndecan 2(SDC2)
BC131755	Homo sapiens	ATP binding cassette subfamily C member 3(ABCC3)
BC125089	Homo sapiens	TBC1 domain family member 25(TBC1D25)
AK094702	Homo sapiens	nucleus accumbens associated 1(NACC1)
AF182077	Homo sapiens	BRD4 interacting chromatin remodeling complex associated protein(BICRA)
AK098271	Homo sapiens	RNA polymerase II subunit B(POLR2B)
BC011870	Homo sapiens	zinc finger protein 771(ZNF771)
AK295010	Homo sapiens	nuclear export mediator factor(NEMF)
BC171782	Homo sapiens	cell migration inducing hyaluronidase 2(CEMIP2)
BC014906	Homo sapiens	YY1 associated protein 1(YY1AP1)
AK092970	Homo sapiens	peptidylprolyl cis/trans isomerase, NIMA-interacting 1(PIN1)
AB039904	Homo sapiens	tripartite motif containing 34(TRIM34)
CR749702	Homo sapiens	cyclin and CBS domain divalent metal cation transport mediator 3(CNNM3)
BC131723	Homo sapiens	cAMP responsive element binding protein 3 like 2(CREB3L2)
AK124205	Homo sapiens	glutamine rich 1(QRICH1)
AK092977	Homo sapiens	SRSF protein kinase 2(SRPK2)
AB039903	Homo sapiens	TRIM6-TRIM34 readthrough(TRIM6-TRIM34)
BX538316	Homo sapiens	tubulin tyrosine ligase(TTL)
AB039902	Homo sapiens	tripartite motif containing 34(TRIM34)
BC011883	Homo sapiens	sorbin and SH3 domain containing 2(SORBS2)
BC010553	Homo sapiens	TIMP metallopeptidase inhibitor 4(TIMP4)
AK124218	Homo sapiens	solute carrier family 9 member A1(SLC9A1)
AK125549	Homo sapiens	ankyrin repeat domain containing 11(ANKRD11)
BC022531	Homo sapiens	olfactomedin 3(OLFM3)
BC064373	Homo sapiens	chromosome 8 open reading frame 82(C8orf82)
BC171792	Homo sapiens	long intergenic non-protein coding RNA 1555(LINC01555)
AF078671	Homo sapiens	transporter 2, ATP binding cassette subfamily B member(TAP2)
CR936654	Homo sapiens	Ras and Rab interactor 3(RIN3)
AF034373	Homo sapiens	ataxin 2 like(ATXN2L)
AK302628	Homo sapiens	roundabout guidance receptor 4(ROBO4)
AK055117	Homo sapiens	AF4/FMR2 family member 3(AFF3)
AK295004	Homo sapiens	dysferlin(DYSF)
BC110813	Homo sapiens	cAMP responsive element binding protein 3 like 2(CREB3L2)
BC031483	Homo sapiens	ankyrin repeat and IBR domain containing 1(ANKIB1)
AK296365	Homo sapiens	carboxypeptidase X, M14 family member 2(CPXM2)
BC010563	Homo sapiens	ADAM metallopeptidase with thrombospondin type 1 motif 6(ADAMTS6)
AB013341	Homo sapiens	RAD51 paralog D(RAD51D)
BC101057	Homo sapiens	minichromosome maintenance 8 homologous recombination repair factor(MCM8)
BC126356	Homo sapiens	eukaryotic translation initiation factor 2 alpha kinase 3(EIF2AK3)
BC101056	Homo sapiens	minichromosome maintenance 8 homologous recombination repair factor(MCM8)
AK301368	Homo sapiens	transient receptor potential cation channel subfamily C member 4 associated protein(TRPC4AP)
BC137014	Homo sapiens	mannosidase endo-alpha(MANEA)
AK124220	Homo sapiens	RDM1 pseudogene 5(RDM1P5)
L07483	Homo sapiens	paired box 3(PAX3)
AY611630	Homo sapiens	serum response factor binding protein 1(SRFBP1)
BC075076	Homo sapiens	6-phosphofructo-2-kinase/fructose-2,6-biphosphatase 2(PFKFB2)
BC075075	Homo sapiens	6-phosphofructo-2-kinase/fructose-2,6-biphosphatase 2(PFKFB2)
AK091624	Homo sapiens	HECT and RLD domain containing E3 ubiquitin protein ligase family member 1(HERC1)
AL137519	Homo sapiens	dynein cytoplasmic 1 intermediate chain 2(DYNC1I2)
CR936620	Homo sapiens	integrator complex subunit 6 like(INTS6L)
AF245303	Homo sapiens	prominin 2(PROM2)
AF245304	Homo sapiens	prominin 2(PROM2)
KU178442	Homo sapiens	succinate-CoA ligase ADP-forming subunit beta(SUCLA2)
BC126367	Homo sapiens	vomeronasal 1 receptor 5 (gene/pseudogene)(VN1R5)
AJ276894	Homo sapiens	RNA terminal phosphate cyclase like 1(RCL1)
U59111	Homo sapiens	epiphycan(EPYC)
L43964	Homo sapiens	presenilin 2(PSEN2)
BC114363	Homo sapiens	paired box 3(PAX3)
AK302686	Homo sapiens	nitric oxide synthase 3(NOS3)
BC000350	Homo sapiens	ubiquitin specific peptidase 11(USP11)
AM182887	Homo sapiens	patatin like phospholipase domain containing 1(PNPLA1)
AK024855	Homo sapiens	cathepsin S(CTSS)
BC060839	Homo sapiens	3-hydroxyacyl-CoA dehydratase 2(HACD2)
AK092963	Homo sapiens	ribosomal protein L5(RPL5)
BC137016	Homo sapiens	mannosidase endo-alpha(MANEA)
AK023529	Homo sapiens	poly(rC) binding protein 2(PCBP2)
BC101055	Homo sapiens	minichromosome maintenance 8 homologous recombination repair factor(MCM8)
BC131713	Homo sapiens	guanylate binding protein family member 6(GBP6)
BC101054	Homo sapiens	minichromosome maintenance 8 homologous recombination repair factor(MCM8)
AB445624	Homo sapiens	toll like receptor 2(TLR2)
AK124232	Homo sapiens	mediator complex subunit 27(MED27)
AF170071	Homo sapiens	phospholipase C epsilon 1(PLCE1)
AL834276	Homo sapiens	methylthioribose-1-phosphate isomerase 1(MRI1)
AK054694	Homo sapiens	zinc finger protein 335(ZNF335)
AK098231	Homo sapiens	zinc finger protein 655(ZNF655)
AK098230	Homo sapiens	PCBP1 antisense RNA 1(PCBP1-AS1)
AB040949	Homo sapiens	phospholipase C epsilon 1(PLCE1)
AF116571	Homo sapiens	SRY-box transcription factor 13(SOX13)
AK314654	Homo sapiens	minichromosome maintenance 8 homologous recombination repair factor(MCM8)
AL834266	Homo sapiens	zinc finger protein 664(ZNF664)
BC126341	Homo sapiens	vomeronasal 1 receptor 5 (gene/pseudogene)(VN1R5)
AK091601	Homo sapiens	semaphorin 4D(SEMA4D)
AK314657	Homo sapiens	arrestin domain containing 2(ARRDC2)
AB039947	Homo sapiens	N-terminal EF-hand calcium binding protein 3(NECAB3)
AY665470	Homo sapiens	Ras association domain family member 8(RASSF8)
AF043294	Homo sapiens	BUB1 mitotic checkpoint serine/threonine kinase(BUB1)
AY665471	Homo sapiens	Ras association domain family member 8(RASSF8)
M55379	Homo sapiens	hepatocyte growth factor(HGF)
AK056401	Homo sapiens	long intergenic non-protein coding RNA 886(LINC00886)
D83785	Homo sapiens	mastermind like transcriptional coactivator 1(MAML1)
AK091609	Homo sapiens	ecotropic viral integration site 5 like(EVI5L)
AB040930	Homo sapiens	leucine rich repeat neuronal 1(LRRN1)
BC075072	Homo sapiens	syntrophin gamma 1(SNTG1)
AJ504806	Homo sapiens	structural maintenance of chromosomes 1B(SMC1B)
AK172778	Homo sapiens	ATPase 13A1(ATP13A1)
AK125583	Homo sapiens	uncharacterized LOC101929732(LOC101929732)
AK023505	Homo sapiens	CAP-Gly domain containing linker protein family member 4(CLIP4)
AY665469	Homo sapiens	Ras association domain family member 8(RASSF8)
BC001655	Homo sapiens	YY1 associated protein 1(YY1AP1)
X76534	Homo sapiens	glycoprotein nmb(GPNMB)
AY665468	Homo sapiens	Ras association domain family member 8(RASSF8)
BC126354	Homo sapiens	eukaryotic translation initiation factor 2 alpha kinase 3(EIF2AK3)
AK299408	Homo sapiens	guanylate binding protein family member 6(GBP6)
BC035884	Homo sapiens	transmembrane protein 120B(TMEM120B)
AK056404	Homo sapiens	TLC domain containing 4(TLCD4)
AK056406	Homo sapiens	deltex E3 ubiquitin ligase 3L(DTX3L)
BC143695	Homo sapiens	syntrophin gamma 1(SNTG1)
BC101817	Homo sapiens	TBC1 domain family member 25(TBC1D25)
BC101819	Homo sapiens	TBC1 domain family member 25(TBC1D25)
CR936708	Homo sapiens	ATPase plasma membrane Ca2+ transporting 4(ATP2B4)
BC027483	Homo sapiens	inhibitor of Bruton tyrosine kinase(IBTK)
AF207881	Homo sapiens	ecto-NOX disulfide-thiol exchanger 2(ENOX2)
BC032828	Homo sapiens	secreted frizzled related protein 4(SFRP4)
BC006538	Homo sapiens	N-myristoyltransferase 1(NMT1)
EU392451	Homo sapiens	mediator complex subunit 16(MED16)
EU392452	Homo sapiens	mediator complex subunit 16(MED16)
BC032827	Homo sapiens	DNA fragmentation factor subunit beta(DFFB)
EU392453	Homo sapiens	mediator complex subunit 16(MED16)
AK125471	Homo sapiens	RNA polymerase I subunit E(POLR1E)
EU392454	Homo sapiens	mediator complex subunit 16(MED16)
U82396	Homo sapiens	Ras association domain family member 8(RASSF8)
BC014176	Homo sapiens	ubiquitin specific peptidase 49(USP49)
EU392455	Homo sapiens	mediator complex subunit 16(MED16)
BC017200	Homo sapiens	calpain 1(CAPN1)
EU392457	Homo sapiens	mediator complex subunit 16(MED16)
AK299437	Homo sapiens	succinate-CoA ligase ADP-forming subunit beta(SUCLA2)
EU392458	Homo sapiens	mediator complex subunit 16(MED16)
KU178364	Homo sapiens	toll like receptor 2(TLR2)
AF059516	Homo sapiens	tolloid like 2(TLL2)
AK128519	Homo sapiens	COP9 signalosome subunit 5(COPS5)
CR936718	Homo sapiens	protein phosphatase 6 regulatory subunit 3(PPP6R3)
AY238437	Homo sapiens	inter-alpha-trypsin inhibitor heavy chain 5(ITIH5)
AK300988	Homo sapiens	mitogen-activated protein kinase kinase 7(MAP2K7)
AK097811	Homo sapiens	RAD51L3-RFFL readthrough(RAD51L3-RFFL)
AK094789	Homo sapiens	transmembrane channel like 2(TMC2)
BC130387	Homo sapiens	mitoguardin 1(MIGA1)
BC007853	Homo sapiens	mediator complex subunit 16(MED16)
AY225123	Homo sapiens	deltex E3 ubiquitin ligase 3L(DTX3L)
BC007855	Homo sapiens	DAP3 binding cell death enhancer 1(DELE1)
EU392449	Homo sapiens	mediator complex subunit 16(MED16)
Z67996	Homo sapiens	tenascin R(TNR)
AK299427	Homo sapiens	neuropeptide Y receptor Y6 (pseudogene)(NPY6R)
AF400227	Homo sapiens	dystonin(DST)
BC043505	Homo sapiens	Rac/Cdc42 guanine nucleotide exchange factor 6(ARHGEF6)
GQ183499	Homo sapiens	maternally expressed 3(MEG3)
GQ183497	Homo sapiens	maternally expressed 3(MEG3)
BC026170	Homo sapiens	transmembrane protein 163(TMEM163)
GQ183498	Homo sapiens	maternally expressed 3(MEG3)
BC018548	Homo sapiens	F-box and leucine rich repeat protein 17(FBXL17)
AF548389	Homo sapiens	UDP glucuronosyltransferase family 2 member B15(UGT2B15)
BC040472	Homo sapiens	fucosyltransferase 6(FUT6)
BC032847	Homo sapiens	exportin 1(XPO1)
BC014190	Homo sapiens	nicotinate phosphoribosyltransferase(NAPRT)
AF072503	Homo sapiens	endogenous retrovirus group W member 1, envelope(ERVW-1)
AF389430	Homo sapiens	semaphorin 6D(SEMA6D)
BC031514	Homo sapiens	timeless circadian regulator(TIMELESS)
U03688	Homo sapiens	cytochrome P450 family 1 subfamily B member 1(CYP1B1)
CR933658	Homo sapiens	protein phosphatase 6 regulatory subunit 3(PPP6R3)
GQ183495	Homo sapiens	maternally expressed 3(MEG3)
GQ183496	Homo sapiens	maternally expressed 3(MEG3)
GQ183494	Homo sapiens	maternally expressed 3(MEG3)
AK055198	Homo sapiens	zinc finger protein 707(ZNF707)
CR533443	Homo sapiens	ergosterol biosynthesis 28 homolog(ERG28)
AK226163	Homo sapiens	HIVEP zinc finger 2(HIVEP2)
AB040971	Homo sapiens	zinc finger and BTB domain containing 4(ZBTB4)
AF090386	Homo sapiens	napsin A aspartic peptidase(NAPSA)
KY781180	Homo sapiens	zinc finger homeobox 2(ZFHX2)
AK124174	Homo sapiens	oxysterol binding protein like 2(OSBPL2)
AK292815	Homo sapiens	phospholipid scramblase 4(PLSCR4)
BC018563	Homo sapiens	GRB10 interacting GYF protein 1(GIGYF1)
BC017230	Homo sapiens	SHANK associated RH domain interactor(SHARPIN)
AK093438	Homo sapiens	tubulin tyrosine ligase like 10(TTLL10)
AK127207	Homo sapiens	LAS1 like ribosome biogenesis factor(LAS1L)
AL831981	Homo sapiens	transcription factor 12(TCF12)
AK094769	Homo sapiens	SLX1A-SULT1A3 readthrough (NMD candidate)(SLX1A-SULT1A3)
AB209653	Homo sapiens	dehydrogenase/reductase 2(DHRS2)
JQ425694	Homo sapiens	6-phosphofructo-2-kinase/fructose-2,6-biphosphatase 1(PFKFB1)
AK298143	Homo sapiens	insulin like growth factor binding protein 3(IGFBP3)
BC026192	Homo sapiens	zinc finger protein 771(ZNF771)
JQ425695	Homo sapiens	6-phosphofructo-2-kinase/fructose-2,6-biphosphatase 1(PFKFB1)
D43636	Homo sapiens	SNF related kinase(SNRK)
CR533454	Homo sapiens	RAB17, member RAS oncogene family(RAB17)
BC044850	Homo sapiens	cell migration inducing hyaluronidase 2(CEMIP2)
BC026193	Homo sapiens	zinc finger protein 22(ZNF22)
BC043521	Homo sapiens	long intergenic non-protein coding RNA 2796(LINC02796)
EU392490	Homo sapiens	mediator complex subunit 16(MED16)
AK025313	Homo sapiens	GUSB pseudogene 11(GUSBP11)
AK022289	Homo sapiens	mediator complex subunit 27(MED27)
AB209650	Homo sapiens	solute carrier family 11 member 1(SLC11A1)
AB242230	Homo sapiens	nicotinate phosphoribosyltransferase(NAPRT)
X68194	Homo sapiens	synaptophysin like 1(SYPL1)
AF151833	Homo sapiens	transcription factor B1, mitochondrial(TFB1M)
BC010609	Homo sapiens	transmembrane protein 231(TMEM231)
CR933630	Homo sapiens	yippee like 1(YPEL1)
EU392492	Homo sapiens	mediator complex subunit 16(MED16)
EU392494	Homo sapiens	mediator complex subunit 16(MED16)
AF010312	Homo sapiens	lipopolysaccharide induced TNF factor(LITAF)
AF067163	Homo sapiens	structural maintenance of chromosomes 3(SMC3)
BC007829	Homo sapiens	Yip1 domain family member 5(YIPF5)
AK055135	Homo sapiens	TOX high mobility group box family member 2(TOX2)
AB012083	Homo sapiens	solute carrier family 22 member 18(SLC22A18)
AK299466	Homo sapiens	guanylate binding protein family member 6(GBP6)
AB209664	Homo sapiens	zinc finger protein 195(ZNF195)
AK308024	Homo sapiens	zinc finger protein 195(ZNF195)
AK310342	Homo sapiens	methylenetetrahydrofolate dehydrogenase (NADP+ dependent) 1 like(MTHFD1L)
BC063141	Homo sapiens	MORN repeat containing 1(MORN1)
AJ312050	Homo sapiens	MORN repeat containing 4(MORN4)
X16901	Homo sapiens	general transcription factor IIF subunit 2(GTF2F2)
AK057790	Homo sapiens	ubiquitin A-52 residue ribosomal protein fusion product 1(UBA52)
AB209660	Homo sapiens	CD40 molecule(CD40)
BC029228	Homo sapiens	yippee like 4(YPEL4)
EU392484	Homo sapiens	mediator complex subunit 16(MED16)
AK025306	Homo sapiens	CDC like kinase 1(CLK1)
EU392485	Homo sapiens	mediator complex subunit 16(MED16)
BC130340	Homo sapiens	glutamine rich 1(QRICH1)
EU392487	Homo sapiens	mediator complex subunit 16(MED16)
BC130342	Homo sapiens	glutamine rich 1(QRICH1)
AK291504	Homo sapiens	guanine monophosphate synthase(GMPS)
AK308031	Homo sapiens	serine incorporator 2(SERINC2)
BC030211	Homo sapiens	uncharacterized LOC729732(LOC729732)
AF067172	Homo sapiens	RNA terminal phosphate cyclase like 1(RCL1)
EU392489	Homo sapiens	mediator complex subunit 16(MED16)
AK127225	Homo sapiens	uncharacterized LOC100130027(LOC100130027)
AK308016	Homo sapiens	DnaJ heat shock protein family (Hsp40) member C7(DNAJC7)
U02309	Homo sapiens	paired box 3(PAX3)
FJ348261	Homo sapiens	G protein-coupled receptor 84(GPR84)
AF116609	Homo sapiens	cytokine induced apoptosis inhibitor 1(CIAPIN1)
AK302713	Homo sapiens	kelch like family member 13(KLHL13)
S68616	Homo sapiens	solute carrier family 9 member A1(SLC9A1)
CR933611	Homo sapiens	transmembrane protein 128(TMEM128)
AL831955	Homo sapiens	CST telomere replication complex component 1(CTC1)
AF346307	Homo sapiens	family with sequence similarity 138 member B(FAM138B)
DQ267935	Homo sapiens	dysferlin(DYSF)
AB209685	Homo sapiens	ADAM metallopeptidase with thrombospondin type 1 motif 6(ADAMTS6)
AF117949	Homo sapiens	lysyl oxidase like 2(LOXL2)
KC136299	Homo sapiens	long intergenic non-protein coding RNA 1488(LINC01488)
KC136298	Homo sapiens	long intergenic non-protein coding RNA 1488(LINC01488)
KC136297	Homo sapiens	long intergenic non-protein coding RNA 1488(LINC01488)
D83703	Homo sapiens	peroxisomal biogenesis factor 6(PEX6)
X52611	Homo sapiens	transcription factor AP-2 alpha(TFAP2A)
BC117371	Homo sapiens	phosphodiesterase 3A(PDE3A)
AK000002	Homo sapiens	ATP binding cassette subfamily C member 10(ABCC10)
AK223097	Homo sapiens	mitochondrial carrier 2(MTCH2)
AK226121	Homo sapiens	phosphate cytidylyltransferase 1B, choline(PCYT1B)
EU392462	Homo sapiens	mediator complex subunit 16(MED16)
AL831940	Homo sapiens	SEC61 translocon subunit alpha 1(SEC61A1)
AB042719	Homo sapiens	minichromosome maintenance 10 replication initiation factor(MCM10)
BC130322	Homo sapiens	thrombopoietin(THPO)
BC117369	Homo sapiens	phosphodiesterase 3A(PDE3A)
BC031562	Homo sapiens	aldo-keto reductase family 7 member A3(AKR7A3)
AK292854	Homo sapiens	ring finger protein 145(RNF145)
AB201715	Homo sapiens	helicase with zinc finger 2(HELZ2)
AK128576	Homo sapiens	dynamin binding protein(DNMBP)
AF083217	Homo sapiens	WD repeat domain 3(WDR3)
M74447	Homo sapiens	transporter 2, ATP binding cassette subfamily B member(TAP2)
AK096551	Homo sapiens	dehydrogenase/reductase 11(DHRS11)
AK096552	Homo sapiens	zinc finger with KRAB and SCAN domains 5(ZKSCAN5)
BC082255	Homo sapiens	TBC1 domain family member 25(TBC1D25)
AK128588	Homo sapiens	arrestin domain containing 2(ARRDC2)
BC136514	Homo sapiens	iodothyronine deiodinase 2(DIO2)
BC113877	Homo sapiens	prominin 2(PROM2)
AK095227	Homo sapiens	solute carrier family 39 member 11(SLC39A11)
AY141972	Homo sapiens	sodium leak channel, non-selective(NALCN)
AK097886	Homo sapiens	HPS4 biogenesis of lysosomal organelles complex 3 subunit 2(HPS4)
L10284	Homo sapiens	calnexin(CANX)
AK291556	Homo sapiens	hydroxy-delta-5-steroid dehydrogenase, 3 beta- and steroid delta-isomerase 1(HSD3B1)
BX647412	Homo sapiens	RAB17, member RAS oncogene family(RAB17)
AK292883	Homo sapiens	6-phosphofructo-2-kinase/fructose-2,6-biphosphatase 2(PFKFB2)
BC071598	Homo sapiens	D-2-hydroxyglutarate dehydrogenase(D2HGDH)
BC144133	Homo sapiens	phosphatidylinositol-4-phosphate 3-kinase catalytic subunit type 2 gamma(PIK3C2G)
AK226106	Homo sapiens	leucine rich repeat and sterile alpha motif containing 1(LRSAM1)
BC144134	Homo sapiens	phosphatidylinositol-4-phosphate 3-kinase catalytic subunit type 2 gamma(PIK3C2G)
AK001393	Homo sapiens	EF-hand calcium binding domain 2(EFCAB2)
AK226108	Homo sapiens	nuclear receptor subfamily 4 group A member 3(NR4A3)
BC113870	Homo sapiens	zinc finger protein 571(ZNF571)
AK025345	Homo sapiens	leucine zipper protein 1(LUZP1)
AK026673	Homo sapiens	tubulin tyrosine ligase(TTL)
AK096563	Homo sapiens	calcium voltage-gated channel subunit alpha1 E(CACNA1E)
AY457923	Homo sapiens	TATA-box binding protein like 2(TBPL2)
CR457282	Homo sapiens	RAB17, member RAS oncogene family(RAB17)
DQ344550	Homo sapiens	triokinase and FMN cyclase(TKFC)
BC136524	Homo sapiens	SPT6 homolog, histone chaperone and transcription elongation factor(SUPT6H)
BC048331	Homo sapiens	peroxisomal biogenesis factor 6(PEX6)
BC048332	Homo sapiens	solute carrier family 5 member 9(SLC5A9)
AK097899	Homo sapiens	guided entry of tail-anchored proteins factor 4(GET4)
BC008309	Homo sapiens	lipopolysaccharide induced TNF factor(LITAF)
AY007096	Homo sapiens	aldehyde dehydrogenase 16 family member A1(ALDH16A1)
AK292878	Homo sapiens	BCL6B transcription repressor(BCL6B)
AK127262	Homo sapiens	proprotein convertase subtilisin/kexin type 7(PCSK7)
BC136522	Homo sapiens	SPT6 homolog, histone chaperone and transcription elongation factor(SUPT6H)
BC008305	Homo sapiens	regulator of MON1-CCZ1(RMC1)
AK291545	Homo sapiens	general transcription factor IIF subunit 2(GTF2F2)
AB209617	Homo sapiens	cytochrome b5 type A(CYB5A)
BX647423	Homo sapiens	zinc finger protein 555(ZNF555)
AK290214	Homo sapiens	phospholipid scramblase 4(PLSCR4)
AB209619	Homo sapiens	zinc finger protein 7(ZNF7)
BC099912	Homo sapiens	opioid receptor kappa 1(OPRK1)
BC146785	Homo sapiens	INO80 complex ATPase subunit(INO80)
AF134477	Homo sapiens	dynein cytoplasmic 1 intermediate chain 2(DYNC1I2)
BC062622	Homo sapiens	opsin 3(OPN3)
AB209631	Homo sapiens	fibroblast growth factor receptor 4(FGFR4)
M61108	Homo sapiens	TAL bHLH transcription factor 1, erythroid differentiation factor(TAL1)
AK127280	Homo sapiens	ubiquitin protein ligase E3C(UBE3C)
AK025335	Homo sapiens	synergin gamma(SYNRG)
AK316481	Homo sapiens	exportin 1(XPO1)
AK127277	Homo sapiens	attractin like 1(ATRNL1)
BC009628	Homo sapiens	forkhead box P4(FOXP4)
AY640925	Homo sapiens	Yip1 domain family member 5(YIPF5)
AY640926	Homo sapiens	Yip1 domain family member 5(YIPF5)
BC069265	Homo sapiens	asteroid homolog 1(ASTE1)
AY640927	Homo sapiens	Yip1 domain family member 5(YIPF5)
BX537908	Homo sapiens	ankyrin repeat domain 33(ANKRD33)
AK294605	Homo sapiens	zinc finger protein 76(ZNF76)
AK316478	Homo sapiens	FERM domain containing 1(FRMD1)
AY640928	Homo sapiens	Yip1 domain family member 5(YIPF5)
AL832449	Homo sapiens	solute carrier family 34 member 3(SLC34A3)
AY640929	Homo sapiens	Yip1 domain family member 5(YIPF5)
BX648724	Homo sapiens	proline rich 27(PRR27)
AB209628	Homo sapiens	major histocompatibility complex, class II, DQ alpha 1(HLA-DQA1)
LC015092	Homo sapiens	LBX1 antisense RNA 1(LBX1-AS1)
BC144117	Homo sapiens	oxysterol binding protein like 1A(OSBPL1A)
AF180322	Homo sapiens	UDP glucuronosyltransferase family 2 member B15(UGT2B15)
BC144116	Homo sapiens	MORC family CW-type zinc finger 3(MORC3)
AB209646	Homo sapiens	collagen type IV alpha 1 chain(COL4A1)
AK092182	Homo sapiens	semaphorin 3B(SEMA3B)
AK315131	Homo sapiens	solute carrier family 13 member 3(SLC13A3)
BC136503	Homo sapiens	peroxiredoxin like 2C(PRXL2C)
AK127284	Homo sapiens	coiled-coil domain containing 159(CCDC159)
AK096544	Homo sapiens	integrator complex subunit 6 like(INTS6L)
AL832437	Homo sapiens	forkhead box P4(FOXP4)
BC136501	Homo sapiens	peroxiredoxin like 2C(PRXL2C)
AL833760	Homo sapiens	phospholipid scramblase 4(PLSCR4)
AF482988	Homo sapiens	sodium voltage-gated channel alpha subunit 5(SCN5A)
M29871	Homo sapiens	Rac family small GTPase 2(RAC2)
AK292895	Homo sapiens	oxysterol binding protein like 1A(OSBPL1A)
BC146780	Homo sapiens	cell migration inducing hyaluronidase 2(CEMIP2)
AK223026	Homo sapiens	tumor protein p53(TP53)
BC036395	Homo sapiens	methylcrotonyl-CoA carboxylase subunit 1(MCCC1)
AL080137	Homo sapiens	family with sequence similarity 205 member B, pseudogene(FAM205BP)
AY302699	Homo sapiens	zinc finger and BTB domain containing 4(ZBTB4)
AF130055	Homo sapiens	translocation associated membrane protein 1(TRAM1)
BC065714	Homo sapiens	cystatin S(CST4)
Y08614	Homo sapiens	exportin 1(XPO1)
BC144108	Homo sapiens	protein phosphatase 1 regulatory subunit 9A(PPP1R9A)
AK024066	Homo sapiens	proton activated chloride channel 1(PACC1)
BC144109	Homo sapiens	protein phosphatase 1 regulatory subunit 9A(PPP1R9A)
AK225684	Homo sapiens	rhomboid 5 homolog 2(RHBDF2)
AF203474	Homo sapiens	YY1 associated protein 1(YY1AP1)
AK093481	Homo sapiens	required for meiotic nuclear division 5 homolog B(RMND5B)
BC023087	Homo sapiens	NBPF member 15(NBPF15)
AK096514	Homo sapiens	protein phosphatase 1 regulatory subunit 9A(PPP1R9A)
BC009605	Homo sapiens	Rac family small GTPase 3(RAC3)
AK096510	Homo sapiens	ATPase 13A4(ATP13A4)
AK131329	Homo sapiens	guanylate binding protein family member 6(GBP6)
AL833756	Homo sapiens	DEAD-box helicase 55(DDX55)
AB056507	Homo sapiens	zinc finger E-box binding homeobox 2(ZEB2)
BC016793	Homo sapiens	fuzzy planar cell polarity protein(FUZ)
BC014130	Homo sapiens	F-box and WD repeat domain containing 5(FBXW5)
BC146752	Homo sapiens	ubiquitin specific peptidase 19(USP19)
AK123705	Homo sapiens	cytochrome b5 reductase 1(CYB5R1)
AF003199	Homo sapiens	mitogen-activated protein kinase kinase 7(MAP2K7)
AF063657	Homo sapiens	fms related receptor tyrosine kinase 1(FLT1)
BC146759	Homo sapiens	slit guidance ligand 3(SLIT3)
AF063658	Homo sapiens	kinase insert domain receptor(KDR)
BC047037	Homo sapiens	LIMD1 antisense RNA 1(LIMD1-AS1)
AK225694	Homo sapiens	CD22 molecule(CD22)
AK225693	Homo sapiens	transporter 2, ATP binding cassette subfamily B member(TAP2)
X06700	Homo sapiens	collagen type III alpha 1 chain(COL3A1)
U56998	Homo sapiens	polo like kinase 3(PLK3)
BC006569	Homo sapiens	N-myristoyltransferase 1(NMT1)
M83363	Homo sapiens	ATPase plasma membrane Ca2+ transporting 4(ATP2B4)
AF389429	Homo sapiens	semaphorin 6D(SEMA6D)
AF389428	Homo sapiens	semaphorin 6D(SEMA6D)
AF389427	Homo sapiens	semaphorin 6D(SEMA6D)
BC038114	Homo sapiens	ST6 N-acetylgalactosaminide alpha-2,6-sialyltransferase 2(ST6GALNAC2)
BX647431	Homo sapiens	DENN domain containing 2B(DENND2B)
BC035085	Homo sapiens	metaxin 3(MTX3)
AK315191	Homo sapiens	gon-4 like(GON4L)
AK315192	Homo sapiens	cadherin 4(CDH4)
AK094797	Homo sapiens	N-acetyltransferase 8 like(NAT8L)
AF041434	Homo sapiens	protein tyrosine phosphatase 4A3(PTP4A3)
AL833732	Homo sapiens	carboxypeptidase X, M14 family member 2(CPXM2)
AK123710	Homo sapiens	pleckstrin homology domain containing B2(PLEKHB2)
AK303194	Homo sapiens	FERM domain containing 1(FRMD1)
AB209601	Homo sapiens	zinc finger protein 675(ZNF675)
BC035095	Homo sapiens	CPVL antisense RNA 2(CPVL-AS2)
AK026693	Homo sapiens	gon-4 like(GON4L)
AF076974	Homo sapiens	transformation/transcription domain associated protein(TRRAP)
AK225670	Homo sapiens	RRN3 pseudogene 2(RRN3P2)
BC128096	Homo sapiens	long intergenic non-protein coding RNA 3019(LINC03019)
BC128095	Homo sapiens	long intergenic non-protein coding RNA 3019(LINC03019)
BC070296	Homo sapiens	plasminogen like B1(PLGLB1)
AK294635	Homo sapiens	ubiquitin specific peptidase 11(USP11)
BC065709	Homo sapiens	inositol polyphosphate multikinase(IPMK)
AB053445	Homo sapiens	cadherin related 23(CDH23)
BC014165	Homo sapiens	GLI family zinc finger 4(GLI4)
AK097839	Homo sapiens	syndecan 2(SDC2)
BC150306	Homo sapiens	zinc finger protein 75a(ZNF75A)
AK027375	Homo sapiens	inter-alpha-trypsin inhibitor heavy chain 5(ITIH5)
AK026044	Homo sapiens	ATPase 13A1(ATP13A1)
AK054992	Homo sapiens	TRIM67 antisense RNA 1(TRIM67-AS1)
BC150303	Homo sapiens	zinc finger protein 793(ZNF793)
AK301043	Homo sapiens	DEAD-box helicase 55(DDX55)
BC013996	Homo sapiens	aldo-keto reductase family 7 member A2(AKR7A2)
AY302538	Homo sapiens	ATPase phospholipid transporting 8B3(ATP8B3)
AF432853	Homo sapiens	inositol polyphosphate multikinase(IPMK)
AF164142	Homo sapiens	solute carrier family 23 member 2(SLC23A2)
BC045591	Homo sapiens	limbic system associated membrane protein(LSAMP)
AL442083	Homo sapiens	SLX4 structure-specific endonuclease subunit(SLX4)
BC036629	Homo sapiens	SLC12A2 divergent transcript(SLC12A2-DT)
AK091940	Homo sapiens	ring finger protein 183(RNF183)
BC105741	Homo sapiens	GRAM domain containing 1B(GRAMD1B)
BC112023	Homo sapiens	helicase with zinc finger 2(HELZ2)
AK128064	Homo sapiens	dynein heavy chain domain 1(DNHD1)
AK315689	Homo sapiens	adaptor related protein complex 1 subunit mu 2(AP1M2)
AB449912	Homo sapiens	TBC1 domain family member 25(TBC1D25)
AK122762	Homo sapiens	cell death inducing DFFA like effector a(CIDEA)
BX648228	Homo sapiens	MIA SH3 domain ER export factor 2(MIA2)
AB058728	Homo sapiens	ATPase 13A1(ATP13A1)
AB041046	Homo sapiens	formin homology 2 domain containing 1(FHOD1)
BC044245	Homo sapiens	pleckstrin homology domain containing A5(PLEKHA5)
BC015706	Homo sapiens	spindle and kinetochore associated complex subunit 1(SKA1)
AK128080	Homo sapiens	sorting nexin family member 30(SNX30)
AJ000008	Homo sapiens	phosphatidylinositol-4-phosphate 3-kinase catalytic subunit type 2 gamma(PIK3C2G)
AK130389	Homo sapiens	sperm acrosome associated 9(SPACA9)
BC045581	Homo sapiens	ArfGAP with FG repeats 1(AGFG1)
AB058715	Homo sapiens	cadherin related 23(CDH23)
AK090627	Homo sapiens	VAC14 component of PIKFYVE complex(VAC14)
AL359937	Homo sapiens	glutathione S-transferase theta 1(GSTT1)
BC011353	Homo sapiens	lipoprotein lipase(LPL)
M80627	Homo sapiens	transcription factor 12(TCF12)
AK302357	Homo sapiens	secreted frizzled related protein 4(SFRP4)
CR627399	Homo sapiens	midasin AAA ATPase 1(MDN1)
AF200345	Homo sapiens	napsin A aspartic peptidase(NAPSA)
AK128092	Homo sapiens	p53 regulation associated lncRNA(PRAL)
L40326	Homo sapiens	damage specific DNA binding protein 1(DDB1)
CR627394	Homo sapiens	charged multivesicular body protein 1B2, pseudogene(CHMP1B2P)
M22734	Homo sapiens	platelet derived growth factor receptor alpha(PDGFRA)
AK296869	Homo sapiens	timeless circadian regulator(TIMELESS)
AK315668	Homo sapiens	insulin like growth factor binding protein 3(IGFBP3)
BX648206	Homo sapiens	biorientation of chromosomes in cell division 1 like 1(BOD1L1)
AK091926	Homo sapiens	solute carrier family 13 member 2(SLC13A2)
AK056713	Homo sapiens	solute carrier family 13 member 3(SLC13A3)
CR541863	Homo sapiens	BCL2 interacting killer(BIK)
BC037975	Homo sapiens	zinc finger E-box binding homeobox 2(ZEB2)
AK026011	Homo sapiens	NADPH oxidase 5(NOX5)
AB208953	Homo sapiens	transporter 2, ATP binding cassette subfamily B member(TAP2)
AK302340	Homo sapiens	transporter 1, ATP binding cassette subfamily B member(TAP1)
AB208954	Homo sapiens	ATP binding cassette subfamily C member 3(ABCC3)
AK097230	Homo sapiens	FYVE, RhoGEF and PH domain containing 2(FGD2)
BC007287	Homo sapiens	zinc finger protein 213(ZNF213)
D25304	Homo sapiens	Rac/Cdc42 guanine nucleotide exchange factor 6(ARHGEF6)
AB099290	Homo sapiens	slingshot protein phosphatase 2(SSH2)
AK128098	Homo sapiens	centriolin(CNTRL)
BC104420	Homo sapiens	TNF superfamily member 12(TNFSF12)
AY188334	Homo sapiens	ataxin 2 like(ATXN2L)
AK091932	Homo sapiens	solute carrier family 3 member 1(SLC3A1)
BC036655	Homo sapiens	DENN domain containing 2B(DENND2B)
AF046078	Homo sapiens	BUB1 mitotic checkpoint serine/threonine kinase(BUB1)
AK122797	Homo sapiens	proteasome subunit beta 11(PSMB11)
AK090600	Homo sapiens	centriolin(CNTRL)
AL833246	Homo sapiens	uncharacterized LOC100507156(LOC100507156)
AY188338	Homo sapiens	ataxin 2 like(ATXN2L)
AY188337	Homo sapiens	ataxin 2 like(ATXN2L)
AB034747	Homo sapiens	lipopolysaccharide induced TNF factor(LITAF)
AK056723	Homo sapiens	small regulatory polypeptide of amino acid response(SPAAR)
AY188336	Homo sapiens	ataxin 2 like(ATXN2L)
AY188335	Homo sapiens	ataxin 2 like(ATXN2L)
BX648267	Homo sapiens	deltex E3 ubiquitin ligase 3L(DTX3L)
AK124508	Homo sapiens	lysyl oxidase like 2(LOXL2)
AK098531	Homo sapiens	cullin 3(CUL3)
X90568	Homo sapiens	titin(TTN)
BC047324	Homo sapiens	structural maintenance of chromosomes 3(SMC3)
BC022022	Homo sapiens	zinc finger protein 555(ZNF555)
AF513978	Homo sapiens	centriolin(CNTRL)
BC034009	Homo sapiens	agrin(AGRN)
AK026092	Homo sapiens	Ras and Rab interactor 3(RIN3)
BC000639	Homo sapiens	family with sequence similarity 32 member A(FAM32A)
AB046778	Homo sapiens	protein phosphatase 6 regulatory subunit 3(PPP6R3)
AK124519	Homo sapiens	non-compact myelin associated protein(NCMAP)
BC011387	Homo sapiens	solute carrier family 29 member 2(SLC29A2)
CR541883	Homo sapiens	BCL2 interacting killer(BIK)
AF055872	Homo sapiens	TNF superfamily member 12(TNFSF12)
BC007267	Homo sapiens	fatty acid synthase(FASN)
AY335491	Homo sapiens	gon-4 like(GON4L)
AB058760	Homo sapiens	netrin G2(NTNG2)
AY335490	Homo sapiens	gon-4 like(GON4L)
AB037838	Homo sapiens	inhibitor of Bruton tyrosine kinase(IBTK)
AB037839	Homo sapiens	sphingomyelin phosphodiesterase 4(SMPD4)
AY335492	Homo sapiens	gon-4 like(GON4L)
AK023805	Homo sapiens	DnaJ heat shock protein family (Hsp40) member C16(DNAJC16)
AK098546	Homo sapiens	POU domain class 5, transcription factor 2(POU5F2)
AF046059	Homo sapiens	cytokine receptor like factor 3(CRLF3)
BC074953	Homo sapiens	cystatin S(CST4)
AB037833	Homo sapiens	cell migration inducing hyaluronidase 2(CEMIP2)
BC074952	Homo sapiens	cystatin S(CST4)
AK026081	Homo sapiens	F-box and WD repeat domain containing 5(FBXW5)
AK054967	Homo sapiens	yippee like 4(YPEL4)
BC011396	Homo sapiens	pseudouridine synthase 7(PUS7)
BC014422	Homo sapiens	RAD51 paralog D(RAD51D)
BT006919	Homo sapiens	Rac family small GTPase 2(RAC2)
AK027392	Homo sapiens	zinc finger and BTB domain containing 45(ZBTB45)
AL110136	Homo sapiens	THUMPD3 antisense RNA 1(THUMPD3-AS1)
AK124529	Homo sapiens	ring finger protein 216 pseudogene 1(RNF216P1)
AM980945	Homo sapiens	ankyrin repeat and sterile alpha motif domain containing 1B(ANKS1B)
AK094158	Homo sapiens	BTG3 associated nuclear protein(BANP)
AB037807	Homo sapiens	ankyrin repeat and IBR domain containing 1(ANKIB1)
BC069583	Homo sapiens	6-phosphofructo-2-kinase/fructose-2,6-biphosphatase 2(PFKFB2)
AK298609	Homo sapiens	sphingomyelin phosphodiesterase 4(SMPD4)
AK314376	Homo sapiens	SNF related kinase(SNRK)
BC034028	Homo sapiens	SHANK associated RH domain interactor(SHARPIN)
AK124523	Homo sapiens	kinesin family member 27 pseudogene(LOC389765)
BC035355	Homo sapiens	F-box and WD repeat domain containing 5(FBXW5)
AK125852	Homo sapiens	IQ motif and ankyrin repeat containing 1(IQANK1)
AB037802	Homo sapiens	component of oligomeric golgi complex 1(COG1)
BC167154	Homo sapiens	zinc finger CCCH-type containing 6(ZC3H6)
AL137269	Homo sapiens	transmembrane protein 18(TMEM18)
BX648254	Homo sapiens	heat shock factor binding protein 1(HSBP1)
AK124539	Homo sapiens	zinc finger protein 326(ZNF326)
BX648251	Homo sapiens	laminin subunit beta 1(LAMB1)
AK123206	Homo sapiens	CUGBP Elav-like family member 3(CELF3)
AK123209	Homo sapiens	integrator complex subunit 6 like(INTS6L)
BC039715	Homo sapiens	ankyrin repeat domain 10(ANKRD10)
BC008577	Homo sapiens	ZNF710 antisense RNA 1(ZNF710-AS1)
AL122107	Homo sapiens	transmembrane protein 132C(TMEM132C)
BC069586	Homo sapiens	6-phosphofructo-2-kinase/fructose-2,6-biphosphatase 2(PFKFB2)
AK026057	Homo sapiens	MIA SH3 domain ER export factor 2(MIA2)
AF419845	Homo sapiens	regulation of nuclear pre-mRNA domain containing 1A(RPRD1A)
BC007241	Homo sapiens	tRNA methyltransferase 61A(TRMT61A)
AB208908	Homo sapiens	pleckstrin homology domain containing A4(PLEKHA4)
AL833203	Homo sapiens	inter-alpha-trypsin inhibitor heavy chain 5(ITIH5)
AK314364	Homo sapiens	napsin A aspartic peptidase(NAPSA)
AK313032	Homo sapiens	mitochondrial carrier 2(MTCH2)
AB208900	Homo sapiens	hepatocyte growth factor(HGF)
AF363791	Homo sapiens	histamine receptor H3(HRH3)
BC091498	Homo sapiens	dynein cytoplasmic 1 intermediate chain 2(DYNC1I2)
AK125863	Homo sapiens	guided entry of tail-anchored proteins factor 4(GET4)
AB208906	Homo sapiens	peroxisomal biogenesis factor 6(PEX6)
BC010084	Homo sapiens	eukaryotic elongation factor 2 lysine methyltransferase(EEF2KMT)
AB120364	Homo sapiens	solute carrier family 43 member 2(SLC43A2)
AK125861	Homo sapiens	ATPase 13A1(ATP13A1)
AB023229	Homo sapiens	trafficking protein particle complex subunit 8(TRAPPC8)
AK298620	Homo sapiens	sorting nexin 17(SNX17)
AK303623	Homo sapiens	FCH and mu domain containing endocytic adaptor 1(FCHO1)
AJ431726	Homo sapiens	MORN repeat containing 4(MORN4)
AB028913	Homo sapiens	DNA fragmentation factor subunit beta(DFFB)
AB028912	Homo sapiens	DNA fragmentation factor subunit beta(DFFB)
AB028911	Homo sapiens	DNA fragmentation factor subunit beta(DFFB)
BC028178	Homo sapiens	collagen type III alpha 1 chain(COL3A1)
AB023227	Homo sapiens	dynamin binding protein(DNMBP)
AK022524	Homo sapiens	glutamine rich 1(QRICH1)
AF320612	Homo sapiens	solute carrier family 7 member 3(SLC7A3)
AL136749	Homo sapiens	trafficking protein particle complex subunit 8(TRAPPC8)
CR749840	Homo sapiens	exportin 1(XPO1)
AK299950	Homo sapiens	histone cell cycle regulator(HIRA)
AY513281	Homo sapiens	inositol-trisphosphate 3-kinase B(ITPKB)
AF098162	Homo sapiens	timeless circadian regulator(TIMELESS)
AK075045	Homo sapiens	solute carrier family 34 member 2(SLC34A2)
AK075046	Homo sapiens	solute carrier family 34 member 2(SLC34A2)
U59431	Homo sapiens	neuropeptide Y receptor Y6 (pseudogene)(NPY6R)
BC021544	Homo sapiens	fatty acid synthase(FASN)
U68382	Homo sapiens	mannosidase alpha class 2B member 1(MAN2B1)
BC041130	Homo sapiens	FCH and mu domain containing endocytic adaptor 1(FCHO1)
BC002444	Homo sapiens	ergosterol biosynthesis 28 homolog(ERG28)
AF087481	Homo sapiens	lysine demethylase 5B(KDM5B)
AK056788	Homo sapiens	zona pellucida glycoprotein 3(ZP3)
AK313899	Homo sapiens	mitogen-activated protein kinase kinase 7(MAP2K7)
BC020229	Homo sapiens	arylsulfatase D(ARSD)
AL117647	Homo sapiens	ASXL transcriptional regulator 1(ASXL1)
BC127109	Homo sapiens	trafficking protein particle complex subunit 8(TRAPPC8)
AK056791	Homo sapiens	mucin 16, cell surface associated(MUC16)
AK222997	Homo sapiens	hydroxy-delta-5-steroid dehydrogenase, 3 beta- and steroid delta-isomerase 2(HSD3B2)
AB451387	Homo sapiens	U2 small nuclear RNA auxiliary factor 2(U2AF2)
AF058953	Homo sapiens	succinate-CoA ligase ADP-forming subunit beta(SUCLA2)
BX648280	Homo sapiens	sorting nexin 29 pseudogene 2(SNX29P2)
AY281132	Homo sapiens	ankyrin repeat and sterile alpha motif domain containing 1B(ANKS1B)
AY281131	Homo sapiens	ankyrin repeat and sterile alpha motif domain containing 1B(ANKS1B)
BC012605	Homo sapiens	Rh associated glycoprotein(RHAG)
AB002305	Homo sapiens	aryl hydrocarbon receptor nuclear translocator 2(ARNT2)
BT006954	Homo sapiens	inhibin subunit alpha(INHA)
AK023833	Homo sapiens	macroH2A.1 histone(MACROH2A1)
BC002431	Homo sapiens	beta-1,4-galactosyltransferase 2(B4GALT2)
AF208227	Homo sapiens	nuclear receptor coactivator 6(NCOA6)
AF176984	Homo sapiens	transporter 2, ATP binding cassette subfamily B member(TAP2)
AF011387	Homo sapiens	BUB1 mitotic checkpoint serine/threonine kinase(BUB1)
MH929320	Homo sapiens	maternally expressed 3(MEG3)
AK124567	Homo sapiens	3-hydroxyisobutyryl-CoA hydrolase(HIBCH)
HM005545	Homo sapiens	A-kinase anchoring protein 1(AKAP1)
HM005546	Homo sapiens	arylsulfatase D(ARSD)
BC127110	Homo sapiens	trafficking protein particle complex subunit 8(TRAPPC8)
AK299965	Homo sapiens	carboxyl ester lipase(CEL)
AK075068	Homo sapiens	solute carrier family 43 member 2(SLC43A2)
BX648293	Homo sapiens	POC1 centriolar protein B(POC1B)
AB023210	Homo sapiens	WD repeat and FYVE domain containing 3(WDFY3)
HM005538	Homo sapiens	dynein axonemal intermediate chain 3(DNAI3)
CR749815	Homo sapiens	protein phosphatase 6 regulatory subunit 3(PPP6R3)
AB037859	Homo sapiens	myocardin related transcription factor A(MRTFA)
AF321913	Homo sapiens	histamine receptor H3(HRH3)
CR749814	Homo sapiens	opsin 1, long wave sensitive(OPN1LW)
AK124570	Homo sapiens	rhomboid like 3(RHBDL3)
AF321911	Homo sapiens	histamine receptor H3(HRH3)
AF321910	Homo sapiens	histamine receptor H3(HRH3)
AK090689	Homo sapiens	C-type lectin domain family 4 member G pseudogene 1(CLEC4GP1)
EF017811	Homo sapiens	desmocollin 2(DSC2)
AK124577	Homo sapiens	yippee like 4(YPEL4)
EF017812	Homo sapiens	desmocollin 2(DSC2)
BC019254	Homo sapiens	ecto-NOX disulfide-thiol exchanger 2(ENOX2)
BC071837	Homo sapiens	TNF superfamily member 12(TNFSF12)
AK075014	Homo sapiens	solute carrier family 7 member 3(SLC7A3)
AK303660	Homo sapiens	myosin VA(MYO5A)
AK097287	Homo sapiens	hyaluronidase 1(HYAL1)
AB002325	Homo sapiens	protocadherin gamma subfamily A, 8(PCDHGA8)
AB002327	Homo sapiens	tectonin beta-propeller repeat containing 2(TECPR2)
AK097288	Homo sapiens	integrin subunit alpha 1(ITGA1)
AB209370	Homo sapiens	jagged canonical Notch ligand 2(JAG2)
BC142727	Homo sapiens	ubiquitin specific peptidase 19(USP19)
AF243499	Homo sapiens	solute carrier family 4 member 5(SLC4A5)
AK001626	Homo sapiens	slit guidance ligand 3(SLIT3)
AF317889	Homo sapiens	NADPH oxidase 5(NOX5)
AK022569	Homo sapiens	eukaryotic elongation factor 2 kinase(EEF2K)
AB002330	Homo sapiens	U2 snRNP associated SURP domain containing(U2SURP)
M65085	Homo sapiens	follicle stimulating hormone receptor(FSHR)
AK075015	Homo sapiens	solute carrier family 34 member 2(SLC34A2)
AK298667	Homo sapiens	solute carrier family 11 member 1(SLC11A1)
AB107355	Homo sapiens	zinc finger protein 761(ZNF761)
BC013960	Homo sapiens	polo like kinase 3(PLK3)
DQ186651	Homo sapiens	tumor protein p53(TP53)
DQ186652	Homo sapiens	tumor protein p53(TP53)
AK075003	Homo sapiens	neurofilament light chain(NEFL)
AJ242780	Homo sapiens	inositol-trisphosphate 3-kinase B(ITPKB)
AB209380	Homo sapiens	CD81 molecule(CD81)
BC037913	Homo sapiens	Kin17 DNA and RNA binding protein(KIN)
BC069521	Homo sapiens	zona pellucida glycoprotein 4(ZP4)
BC021586	Homo sapiens	myocardin related transcription factor A(MRTFA)
AB028962	Homo sapiens	RAP1 GTPase activating protein 2(RAP1GAP2)
BC137381	Homo sapiens	endogenous retrovirus group W member 1, envelope(ERVW-1)
BC142715	Homo sapiens	tectonin beta-propeller repeat containing 2(TECPR2)
AB209383	Homo sapiens	MDM4 regulator of p53(MDM4)
AY214325	Homo sapiens	nicotinate phosphoribosyltransferase(NAPRT)
AY214326	Homo sapiens	nicotinate phosphoribosyltransferase(NAPRT)
AB028966	Homo sapiens	tetratricopeptide repeat domain 28(TTC28)
BC142717	Homo sapiens	slit guidance ligand 3(SLIT3)
AK289700	Homo sapiens	inositol-trisphosphate 3-kinase B(ITPKB)
AY214327	Homo sapiens	nicotinate phosphoribosyltransferase(NAPRT)
AK000304	Homo sapiens	sphingomyelin phosphodiesterase 4(SMPD4)
AF014401	Homo sapiens	mitogen-activated protein kinase kinase 7(MAP2K7)
AK090663	Homo sapiens	multiple EGF like domains 11(MEGF11)
AK055417	Homo sapiens	ILK associated serine/threonine phosphatase(ILKAP)
BC127102	Homo sapiens	zinc finger E-box binding homeobox 2(ZEB2)
BC033566	Homo sapiens	DPP10 antisense RNA 3(DPP10-AS3)
DQ186650	Homo sapiens	tumor protein p53(TP53)
BC127101	Homo sapiens	zinc finger E-box binding homeobox 2(ZEB2)
AL117619	Homo sapiens	transmembrane protein 98(TMEM98)
BC013975	Homo sapiens	semaphorin 3B(SEMA3B)
BC009039	Homo sapiens	solute carrier family 41 member 3(SLC41A3)
BC105797	Homo sapiens	hepatocyte growth factor(HGF)
AK302311	Homo sapiens	succinate-CoA ligase ADP-forming subunit beta(SUCLA2)
DQ186648	Homo sapiens	tumor protein p53(TP53)
DQ186649	Homo sapiens	tumor protein p53(TP53)
AK302315	Homo sapiens	6-phosphofructo-2-kinase/fructose-2,6-biphosphatase 2(PFKFB2)
BC142707	Homo sapiens	Sad1 and UNC84 domain containing 1(SUN1)
AF229177	Homo sapiens	NADPH oxidase 3(NOX3)
BC137347	Homo sapiens	ATP binding cassette subfamily C member 3(ABCC3)
BC137348	Homo sapiens	ATP binding cassette subfamily C member 3(ABCC3)
CR749863	Homo sapiens	isthmin 2(ISM2)
BC116445	Homo sapiens	zinc finger protein 213(ZNF213)
AK127638	Homo sapiens	selectin P ligand(SELPLG)
AK123276	Homo sapiens	potassium sodium-activated channel subfamily T member 1(KCNT1)
AL833299	Homo sapiens	DnaJ heat shock protein family (Hsp40) member C16(DNAJC16)
AL117607	Homo sapiens	long intergenic non-protein coding RNA 537(LINC00537)
HM005588	Homo sapiens	solute carrier family 23 member 2(SLC23A2)
EU826603	Homo sapiens	fibroblast growth factor receptor 4(FGFR4)
M77025	Homo sapiens	keratin 8(KRT8)
U59493	Homo sapiens	thrombopoietin(THPO)
BC044228	Homo sapiens	plexin D1(PLXND1)
U59494	Homo sapiens	thrombopoietin(THPO)
AB028943	Homo sapiens	HIC ZBTB transcriptional repressor 2(HIC2)
BC045555	Homo sapiens	PDCD6 pseudogene 1(PDCD6P1)
AK022530	Homo sapiens	DnaJ heat shock protein family (Hsp40) member C16(DNAJC16)
BC137361	Homo sapiens	long intergenic non-protein coding RNA 1555(LINC01555)
AK023863	Homo sapiens	adaptor related protein complex 1 subunit mu 2(AP1M2)
BT006984	Homo sapiens	presenilin 2(PSEN2)
BC137362	Homo sapiens	long intergenic non-protein coding RNA 1555(LINC01555)
AK022533	Homo sapiens	RNA polymerase I subunit B(POLR1B)
AK023866	Homo sapiens	poly(A)-specific ribonuclease(PARN)
U60475	Homo sapiens	phosphate regulating endopeptidase homolog X-linked(PHEX)
AL833283	Homo sapiens	dynamin binding protein(DNMBP)
M25874	Homo sapiens	ATPase plasma membrane Ca2+ transporting 4(ATP2B4)
D79995	Homo sapiens	tubulin tyrosine ligase like 4(TTLL4)
BC144424	Homo sapiens	TRIM6-TRIM34 readthrough(TRIM6-TRIM34)
AK001662	Homo sapiens	trafficking protein particle complex subunit 8(TRAPPC8)
AF055022	Homo sapiens	transient receptor potential cation channel subfamily C member 4 associated protein(TRPC4AP)
AK001661	Homo sapiens	PH domain and leucine rich repeat protein phosphatase 2(PHLPP2)
BC042510	Homo sapiens	carboxyl ester lipase(CEL)
AK025633	Homo sapiens	component of oligomeric golgi complex 1(COG1)
AK128864	Homo sapiens	uncharacterized LOC100128593(LOC100128593)
BC127092	Homo sapiens	pleckstrin homology domain containing A5(PLEKHA5)
BC127091	Homo sapiens	pleckstrin homology domain containing A5(PLEKHA5)
BC018894	Homo sapiens	DDB1 and CUL4 associated factor 15(DCAF15)
BC018895	Homo sapiens	DDB1 and CUL4 associated factor 15(DCAF15)
AK127536	Homo sapiens	T-box transcription factor 15(TBX15)
BC017565	Homo sapiens	ADP ribosylation factor 3(ARF3)
AK126202	Homo sapiens	integrator complex subunit 6 like(INTS6L)
BC107480	Homo sapiens	GRAM domain containing 1B(GRAMD1B)
BC121797	Homo sapiens	protein inhibitor of activated STAT 1(PIAS1)
D79984	Homo sapiens	SPT6 homolog, histone chaperone and transcription elongation factor(SUPT6H)
L02931	Homo sapiens	hepatocyte growth factor(HGF)
AL832739	Homo sapiens	G protein-coupled receptor 180(GPR180)
AK022594	Homo sapiens	BLACAT1 overlapping LEMD1 locus(BLACAT1)
BC063464	Homo sapiens	TLCD4-RWDD3 readthrough(TLCD4-RWDD3)
AK001675	Homo sapiens	adaptor related protein complex 5 subunit mu 1(AP5M1)
BC009916	Homo sapiens	solute carrier family 27 member 3(SLC27A3)
AF202063	Homo sapiens	fibroblast growth factor receptor 4(FGFR4)
AK300627	Homo sapiens	ETS2 repressor factor(ERF)
AY465171	Homo sapiens	POTE ankyrin domain family member G(POTEG)
L08240	Homo sapiens	TBC1 domain family member 25(TBC1D25)
AK123181	Homo sapiens	transmembrane protein 120B(TMEM120B)
AY358911	Homo sapiens	cadherin 16(CDH16)
AK222946	Homo sapiens	adaptor related protein complex 1 subunit mu 2(AP1M2)
AK126215	Homo sapiens	SEC16 homolog A, endoplasmic reticulum export factor(SEC16A)
AY055204	Homo sapiens	zinc finger protein 451(ZNF451)
AK313931	Homo sapiens	carnitine O-acetyltransferase(CRAT)
AB209355	Homo sapiens	peroxisomal biogenesis factor 1(PEX1)
AB209354	Homo sapiens	GLI family zinc finger 2(GLI2)
AK307242	Homo sapiens	colony stimulating factor 3 receptor(CSF3R)
AF073710	Homo sapiens	regulator of G protein signaling 9(RGS9)
AB028975	Homo sapiens	centrosomal protein 164(CEP164)
BC004220	Homo sapiens	agrin(AGRN)
AK289771	Homo sapiens	structural maintenance of chromosomes 3(SMC3)
AF318366	Homo sapiens	high mobility group 20B(HMG20B)
AB028979	Homo sapiens	zinc finger homeobox 2(ZFHX2)
AK093784	Homo sapiens	serine incorporator 2(SERINC2)
AK316199	Homo sapiens	TBC1 domain family member 25(TBC1D25)
AK091122	Homo sapiens	hes family bHLH transcription factor 2(HES2)
CR749789	Homo sapiens	YY1 associated protein 1(YY1AP1)
AF487906	Homo sapiens	lysine methyltransferase 2A(KMT2A)
AY032599	Homo sapiens	ATP binding cassette subfamily C member 10(ABCC10)
AK307251	Homo sapiens	Yip1 domain family member 5(YIPF5)
AK126225	Homo sapiens	CLPTM1 like(CLPTM1L)
AK126224	Homo sapiens	BUD23 rRNA methyltransferase and ribosome maturation factor(BUD23)
BC142696	Homo sapiens	mannosidase alpha class 2A member 1(MAN2A1)
AK297383	Homo sapiens	TSC22 domain family member 2(TSC22D2)
AB073597	Homo sapiens	ubiquitin specific peptidase 11(USP11)
BC028241	Homo sapiens	solute carrier family 41 member 3(SLC41A3)
AK057250	Homo sapiens	protein phosphatase 6 regulatory subunit 3(PPP6R3)
BC042520	Homo sapiens	solute carrier family 30 member 4(SLC30A4)
Z22935	Homo sapiens	transporter 2, ATP binding cassette subfamily B member(TAP2)
Z22936	Homo sapiens	transporter 2, ATP binding cassette subfamily B member(TAP2)
X96717	Homo sapiens	transcription factor binding to IGHM enhancer 3(TFE3)
AK289769	Homo sapiens	roundabout guidance receptor 4(ROBO4)
BC072396	Homo sapiens	T cell receptor gamma variable 9(TRGV9)
AK289768	Homo sapiens	ankyrin repeat and sterile alpha motif domain containing 1B(ANKS1B)
AK026934	Homo sapiens	striatin(STRN)
AF254956	Homo sapiens	decaprenyl diphosphate synthase subunit 2(PDSS2)
AK126239	Homo sapiens	long intergenic non-protein coding RNA 1359(LINC01359)
AK307240	Homo sapiens	tripartite motif containing 66(TRIM66)
BX537360	Homo sapiens	nudix hydrolase 21(NUDT21)
AK300670	Homo sapiens	carbonic anhydrase 3(CA3)
BC004200	Homo sapiens	phosphoribosyl pyrophosphate amidotransferase(PPAT)
AK300677	Homo sapiens	carbonic anhydrase 3(CA3)
AK126243	Homo sapiens	long intergenic non-protein coding RNA 1443(LINC01443)
BC031896	Homo sapiens	cell death inducing DFFA like effector a(CIDEA)
U01120	Homo sapiens	glucose-6-phosphatase catalytic subunit 1(G6PC1)
AK299118	Homo sapiens	SEC61 translocon subunit alpha 1(SEC61A1)
BC042545	Homo sapiens	RAB22A, member RAS oncogene family(RAB22A)
BC142672	Homo sapiens	5-oxoprolinase, ATP-hydrolysing(OPLAH)
AK055491	Homo sapiens	dynein cytoplasmic 1 intermediate chain 2(DYNC1I2)
AK075080	Homo sapiens	translocase of outer mitochondrial membrane 70(TOMM70)
BC150293	Homo sapiens	ATPase plasma membrane Ca2+ transporting 4(ATP2B4)
BC150295	Homo sapiens	metaxin 3(MTX3)
AF318329	Homo sapiens	Yip1 domain family member 5(YIPF5)
AK126253	Homo sapiens	long intergenic non-protein coding RNA 2362(LINC02362)
AF318324	Homo sapiens	methylthioribose-1-phosphate isomerase 1(MRI1)
BC034931	Homo sapiens	forkhead box P4(FOXP4)
BC030574	Homo sapiens	U2 small nuclear RNA auxiliary factor 2(U2AF2)
AB451383	Homo sapiens	protein kinase C alpha(PRKCA)
AK092447	Homo sapiens	insulin like growth factor binding protein 3(IGFBP3)
BC142660	Homo sapiens	ubiquitin specific peptidase 19(USP19)
AL136721	Homo sapiens	pterin-4 alpha-carbinolamine dehydratase 2(PCBD2)
BC142665	Homo sapiens	slit guidance ligand 3(SLIT3)
AK000353	Homo sapiens	ecto-NOX disulfide-thiol exchanger 2(ENOX2)
EU794596	Homo sapiens	carbonic anhydrase 3(CA3)
L21208	Homo sapiens	transporter 1, ATP binding cassette subfamily B member(TAP1)
BC142667	Homo sapiens	tectonin beta-propeller repeat containing 2(TECPR2)
L21207	Homo sapiens	transporter 1, ATP binding cassette subfamily B member(TAP1)
L21206	Homo sapiens	transporter 1, ATP binding cassette subfamily B member(TAP1)
L21205	Homo sapiens	transporter 1, ATP binding cassette subfamily B member(TAP1)
L21204	Homo sapiens	transporter 1, ATP binding cassette subfamily B member(TAP1)
AK025656	Homo sapiens	ubiquitin family domain containing 1(UBFD1)
EU794591	Homo sapiens	aldo-keto reductase family 7 member A2(AKR7A2)
AK001689	Homo sapiens	SEC61 translocon subunit alpha 1(SEC61A1)
AK092412	Homo sapiens	mitoguardin 1(MIGA1)
AK127591	Homo sapiens	leucine rich repeat containing 55(LRRC55)
AK093741	Homo sapiens	cyclin dependent kinase like 1(CDKL1)
BC058911	Homo sapiens	secreted frizzled related protein 4(SFRP4)
AY534242	Homo sapiens	XK related 5(XKR5)
AY534243	Homo sapiens	XK related 5(XKR5)
AF298548	Homo sapiens	NLR family pyrin domain containing 1(NLRP1)
AK293830	Homo sapiens	mutY DNA glycosylase(MUTYH)
U88878	Homo sapiens	toll like receptor 2(TLR2)
AB209322	Homo sapiens	semaphorin 3B(SEMA3B)
BC067845	Homo sapiens	signal recognition particle 9(SRP9)
BX537398	Homo sapiens	mannosidase endo-alpha(MANEA)
BC150279	Homo sapiens	TSPO associated protein 1(TSPOAP1)
BC143982	Homo sapiens	thrombopoietin(THPO)
AK057212	Homo sapiens	CD209 molecule(CD209)
BC142656	Homo sapiens	mannosidase alpha class 2A member 1(MAN2A1)
AK024313	Homo sapiens	solute carrier family 35 member E1(SLC35E1)
BX537390	Homo sapiens	Rac/Cdc42 guanine nucleotide exchange factor 6(ARHGEF6)
BC063485	Homo sapiens	hepatocyte growth factor(HGF)
AK025648	Homo sapiens	tripartite motif containing 37(TRIM37)
BC058907	Homo sapiens	ATP binding cassette subfamily C member 3(ABCC3)
BC140007	Homo sapiens	leptin receptor overlapping transcript(LEPROT)
AL136737	Homo sapiens	sphingomyelin phosphodiesterase 4(SMPD4)
AY833562	Homo sapiens	brain expressed X-linked 3(BEX3)
AF008591	Homo sapiens	Rac family small GTPase 3(RAC3)
AY358935	Homo sapiens	ubiquinol-cytochrome c reductase complex assembly factor 3(UQCC3)
CR541797	Homo sapiens	Rab geranylgeranyltransferase subunit alpha(RABGGTA)
BC038411	Homo sapiens	ssemaphorin 4F(SEMA4F)
BC013112	Homo sapiens	solute carrier family 23 member 2(SLC23A2)
BC038419	Homo sapiens	hydroxy-delta-5-steroid dehydrogenase, 3 beta- and steroid delta-isomerase 2(HSD3B2)
AK024387	Homo sapiens	histone deacetylase 7(HDAC7)
BC007352	Homo sapiens	aldo-keto reductase family 7 member A2(AKR7A2)
AL834528	Homo sapiens	calmodulin regulated spectrin associated protein 1(CAMSAP1)
BC010092	Homo sapiens	fuzzy planar cell polarity protein(FUZ)
BC013121	Homo sapiens	TELO2 interacting protein 1(TTI1)
AK074649	Homo sapiens	dysferlin(DYSF)
M73481	Homo sapiens	gastrin releasing peptide receptor(GRPR)
BC000708	Homo sapiens	DNA damage inducible transcript 4(DDIT4)
X15332	Homo sapiens	collagen type III alpha 1 chain(COL3A1)
AK024371	Homo sapiens	RABGEF1 pseudogene 1(RABGEF1P1)
AK304145	Homo sapiens	AMMECR1 like(AMMECR1L)
AF110377	Homo sapiens	transformation/transcription domain associated protein(TRRAP)
AY823398	Homo sapiens	RAB40C, member RAS oncogene family(RAB40C)
HG764171	Homo sapiens	myocardin related transcription factor A(MRTFA)
KJ658417	Homo sapiens	formin homology 2 domain containing 1(FHOD1)
AF071108	Homo sapiens	SMAD family member 5(SMAD5)
BC111562	Homo sapiens	roundabout guidance receptor 4(ROBO4)
M19938	Homo sapiens	6-phosphofructo-2-kinase/fructose-2,6-biphosphatase 1(PFKFB1)
AK293870	Homo sapiens	proprotein convertase subtilisin/kexin type 9(PCSK9)
AK023031	Homo sapiens	armadillo repeat containing X-linked 5(ARMCX5)
BC006001	Homo sapiens	nuclear export mediator factor(NEMF)
AK074660	Homo sapiens	arrestin beta 1(ARRB1)
X59745	Homo sapiens	general transcription factor IIF subunit 2(GTF2F2)
AK023037	Homo sapiens	tectonic family member 2(TCTN2)
AK023038	Homo sapiens	protein phosphatase 1 regulatory subunit 3F(PPP1R3F)
AK094236	Homo sapiens	DNA damage inducible transcript 4 like(DDIT4L)
AK293875	Homo sapiens	TBC1 domain family member 25(TBC1D25)
BX647758	Homo sapiens	exportin 1(XPO1)
AF083115	Homo sapiens	PNMA family member 2(PNMA2)
BX647755	Homo sapiens	GA binding protein transcription factor subunit alpha(GABPA)
BX647753	Homo sapiens	CDC42 binding protein kinase beta(CDC42BPB)
BC114629	Homo sapiens	gon-4 like(GON4L)
CR627427	Homo sapiens	RAP1 GTPase activating protein 2(RAP1GAP2)
BC013144	Homo sapiens	transient receptor potential cation channel subfamily C member 4 associated protein(TRPC4AP)
BC101302	Homo sapiens	paired box 3(PAX3)
BT019443	Homo sapiens	Rac family small GTPase 3(RAC3)
BC101301	Homo sapiens	paired box 3(PAX3)
BC101300	Homo sapiens	paired box 3(PAX3)
AF083105	Homo sapiens	SRY-box transcription factor 13(SOX13)
BC136871	Homo sapiens	TRIM6-TRIM34 readthrough(TRIM6-TRIM34)
AY116661	Homo sapiens	plexin D1(PLXND1)
AK002107	Homo sapiens	RAB3B, member RAS oncogene family(RAB3B)
AK292536	Homo sapiens	glutamine rich 1(QRICH1)
BC109274	Homo sapiens	protein kinase C alpha(PRKCA)
BC109273	Homo sapiens	protein kinase C alpha(PRKCA)
BX647762	Homo sapiens	zinc finger protein 664(ZNF664)
BC063414	Homo sapiens	platelet derived growth factor receptor alpha(PDGFRA)
AK027452	Homo sapiens	SEC61 translocon subunit alpha 1(SEC61A1)
AK027453	Homo sapiens	2-aminoethanethiol dioxygenase(ADO)
BC063418	Homo sapiens	kelch like family member 20(KLHL20)
BC059393	Homo sapiens	oligophrenin 1(OPHN1)
AK308553	Homo sapiens	triokinase and FMN cyclase(TKFC)
BC007311	Homo sapiens	MORC family CW-type zinc finger 3(MORC3)
AK130351	Homo sapiens	charged multivesicular body protein 1B2, pseudogene(CHMP1B2P)
AK027454	Homo sapiens	SEC61 translocon subunit alpha 1(SEC61A1)
AK027458	Homo sapiens	SEC61 translocon subunit alpha 1(SEC61A1)
BC109221	Homo sapiens	solute carrier family 4 member 5(SLC4A5)
AK094217	Homo sapiens	histone deacetylase 9(HDAC9)
BC007305	Homo sapiens	fatty acid synthase(FASN)
BC096338	Homo sapiens	insulin degrading enzyme(IDE)
AF217999	Homo sapiens	fibulin 1(FBLN1)
BC096339	Homo sapiens	insulin degrading enzyme(IDE)
AK128028	Homo sapiens	transmembrane 131 like(TMEM131L)
BC096336	Homo sapiens	insulin degrading enzyme(IDE)
BC096337	Homo sapiens	insulin degrading enzyme(IDE)
AK223399	Homo sapiens	guanine monophosphate synthase(GMPS)
AK023080	Homo sapiens	solute carrier family 35 member F2(SLC35F2)
AF275817	Homo sapiens	PR/SET domain 10(PRDM10)
AF217991	Homo sapiens	semaphorin 3B(SEMA3B)
AF416718	Homo sapiens	presenilin 2(PSEN2)
BC103905	Homo sapiens	patatin like phospholipase domain containing 1(PNPLA1)
AK023082	Homo sapiens	golgi reassembly stacking protein 2(GORASP2)
BC103906	Homo sapiens	patatin like phospholipase domain containing 1(PNPLA1)
BC103907	Homo sapiens	patatin like phospholipase domain containing 1(PNPLA1)
AF084458	Homo sapiens	SEC61 translocon subunit alpha 1(SEC61A1)
AK091190	Homo sapiens	solute carrier family 25 member 45(SLC25A45)
AK299185	Homo sapiens	sphingomyelin phosphodiesterase 4(SMPD4)
AK096880	Homo sapiens	carbonic anhydrase 3(CA3)
CR626991	Homo sapiens	cytoplasmic linker associated protein 2(CLASP2)
AK095551	Homo sapiens	olfactomedin 3(OLFM3)
BC004270	Homo sapiens	Ras association domain family member 5(RASSF5)
AB046815	Homo sapiens	DEAD-box helicase 55(DDX55)
AK027447	Homo sapiens	solute carrier family 7 member 3(SLC7A3)
BC029504	Homo sapiens	glutamic-oxaloacetic transaminase 1 like 1(GOT1L1)
FM246456	Homo sapiens	transporter 2, ATP binding cassette subfamily B member(TAP2)
AJ005698	Homo sapiens	poly(A)-specific ribonuclease(PARN)
AK128031	Homo sapiens	PKHD1 ciliary IPT domain containing fibrocystin/polyductin(PKHD1)
AK095555	Homo sapiens	Yip1 domain family member 6(YIPF6)
AL133603	Homo sapiens	pleckstrin homology domain containing A1(PLEKHA1)
AK293883	Homo sapiens	cordon-bleu WH2 repeat protein(COBL)
AB208849	Homo sapiens	SHC adaptor protein 1(SHC1)
AK291221	Homo sapiens	BUB1 mitotic checkpoint serine/threonine kinase(BUB1)
AJ003030	Homo sapiens	syntrophin gamma 1(SNTG1)
AK304192	Homo sapiens	SRY-box transcription factor 13(SOX13)
AB084280	Homo sapiens	ASXL transcriptional regulator 1(ASXL1)
AF136971	Homo sapiens	ergosterol biosynthesis 28 homolog(ERG28)
AK304173	Homo sapiens	pleckstrin homology and RUN domain containing M1 pseudogene 1(PLEKHM1P1)
AB208866	Homo sapiens	sodium voltage-gated channel alpha subunit 5(SCN5A)
AK308537	Homo sapiens	nuclear export mediator factor(NEMF)
AK092491	Homo sapiens	NOC2 like nucleolar associated transcriptional repressor(NOC2L)
AF037064	Homo sapiens	solute carrier family 22 member 18(SLC22A18)
AB010887	Homo sapiens	ATP binding cassette subfamily C member 3(ABCC3)
AF022805	Homo sapiens	mitogen-activated protein kinase kinase 7(MAP2K7)
AK128044	Homo sapiens	RNA polymerase I subunit B(POLR1B)
BC111553	Homo sapiens	small nucleolar RNA host gene 12(SNHG12)
BC109248	Homo sapiens	plasminogen like B1(PLGLB1)
AK091168	Homo sapiens	golgi reassembly stacking protein 1(GORASP1)
AL133613	Homo sapiens	ATP binding cassette subfamily C member 10(ABCC10)
BC013181	Homo sapiens	tripartite motif containing 65(TRIM65)
AL133612	Homo sapiens	phosphatidylinositol transfer protein membrane associated 2(PITPNM2)
S80437	Homo sapiens	fatty acid synthase(FASN)
BC144438	Homo sapiens	fatty acyl-CoA reductase 2 pseudogene 1(FAR2P1)
AK128062	Homo sapiens	solute carrier family 35 member F2(SLC35F2)
AK027423	Homo sapiens	SEC61 translocon subunit alpha 1(SEC61A1)
AF323726	Homo sapiens	oxysterol binding protein like 1A(OSBPL1A)
BC029532	Homo sapiens	POU domain class 5, transcription factor 2(POU5F2)
BC028201	Homo sapiens	BUB1 mitotic checkpoint serine/threonine kinase(BUB1)
AF123661	Homo sapiens	iodothyronine deiodinase 2(DIO2)
AK128057	Homo sapiens	zinc finger protein 655(ZNF655)
AK128054	Homo sapiens	solute carrier family 41 member 3(SLC41A3)
AY356353	Homo sapiens	ankyrin repeat and sterile alpha motif domain containing 1B(ANKS1B)
AK122752	Homo sapiens	lysine demethylase 5B(KDM5B)
BC013192	Homo sapiens	deltex E3 ubiquitin ligase 2(DTX2)
DQ286964	Homo sapiens	tumor protein p53(TP53)
AK292575	Homo sapiens	cullin 5(CUL5)
BC068108	Homo sapiens	family with sequence similarity 86 member D, pseudogene(FAM86DP)
AK027255	Homo sapiens	BOLA2-SMG1P6 readthrough(BOLA2-SMG1P6)
AK301169	Homo sapiens	fibroblast growth factor receptor 4(FGFR4)
AK027258	Homo sapiens	asteroid homolog 1(ASTE1)
DQ012269	Homo sapiens	toll like receptor 2(TLR2)
DQ012268	Homo sapiens	toll like receptor 2(TLR2)
BC137207	Homo sapiens	family with sequence similarity 138 member F(FAM138F)
AF176008	Homo sapiens	mitochondrial carrier 2(MTCH2)
DQ012267	Homo sapiens	toll like receptor 2(TLR2)
DQ012266	Homo sapiens	toll like receptor 2(TLR2)
DQ012265	Homo sapiens	toll like receptor 2(TLR2)
BC036501	Homo sapiens	mitochondrial ribosomal protein L48(MRPL48)
AB033549	Homo sapiens	solute carrier family 3 member 1(SLC3A1)
AK291278	Homo sapiens	paired box 3(PAX3)
BX648113	Homo sapiens	integrator complex subunit 6 like(INTS6L)
AF208161	Homo sapiens	endogenous retrovirus group W member 1, envelope(ERVW-1)
M96067	Homo sapiens	solute carrier family 9 member A1(SLC9A1)
AK098466	Homo sapiens	transmembrane protein 129, E3 ubiquitin ligase(TMEM129)
BC137223	Homo sapiens	zinc finger protein 648(ZNF648)
AK301157	Homo sapiens	formin homology 2 domain containing 1(FHOD1)
AF429309	Homo sapiens	centrosomal protein 41(CEP41)
DQ012271	Homo sapiens	toll like receptor 2(TLR2)
Y12510	Homo sapiens	beta-1,4-galactosyltransferase 2(B4GALT2)
BC140866	Homo sapiens	shroom family member 2(SHROOM2)
AK291268	Homo sapiens	Ras association domain family member 5(RASSF5)
AF077968	Homo sapiens	CLN3 lysosomal/endosomal transmembrane protein, battenin(CLN3)
BX648118	Homo sapiens	family with sequence similarity 205 member B, pseudogene(FAM205BP)
BC033487	Homo sapiens	peroxisomal biogenesis factor 6(PEX6)
DQ012270	Homo sapiens	toll like receptor 2(TLR2)
AL834471	Homo sapiens	protein phosphatase 6 regulatory subunit 3(PPP6R3)
AB537889	Homo sapiens	ring finger protein 213(RNF213)
BC013892	Homo sapiens	nectin cell adhesion molecule 4(NECTIN4)
GQ891529	Homo sapiens	ATPase H+/K+ transporting subunit alpha(ATP4A)
AK301143	Homo sapiens	presenilin 2(PSEN2)
AK122668	Homo sapiens	olfactory receptor family 56 subfamily B member 1(OR56B1)
BC013899	Homo sapiens	polo like kinase 3(PLK3)
AK301146	Homo sapiens	WD repeat domain 24(WDR24)
AK310094	Homo sapiens	spermidine/spermine N1-acetyltransferase 1(SAT1)
AB593148	Homo sapiens	long intergenic non-protein coding RNA 2078(LINC02078)
AK098436	Homo sapiens	lysyl oxidase like 2(LOXL2)
AK057921	Homo sapiens	ankyrin repeat and SOCS box containing 7(ASB7)
AL137349	Homo sapiens	ankyrin repeat and IBR domain containing 1(ANKIB1)
BC049836	Homo sapiens	syndecan 2(SDC2)
AK097112	Homo sapiens	ERGIC and golgi 2(ERGIC2)
BC140849	Homo sapiens	ubiquitin specific peptidase 11(USP11)
M38188	Homo sapiens	brain expressed X-linked 3(BEX3)
AL833127	Homo sapiens	olfactory receptor family 51 subfamily E member 1(OR51E1)
AK021925	Homo sapiens	solute carrier family 41 member 3(SLC41A3)
BC000526	Homo sapiens	transmembrane protein 98(TMEM98)
AK056606	Homo sapiens	uncharacterized LOC145783(LOC145783)
BC028919	Homo sapiens	transducer of ERBB2, 2(TOB2)
BC071740	Homo sapiens	cytokine induced apoptosis inhibitor 1(CIAPIN1)
AK223300	Homo sapiens	transporter 2, ATP binding cassette subfamily B member(TAP2)
D88827	Homo sapiens	zinc finger protein 263(ZNF263)
AK310914	Homo sapiens	solute carrier family 11 member 1(SLC11A1)
AK094051	Homo sapiens	solute carrier family 41 member 3(SLC41A3)
BC008488	Homo sapiens	reactive oxygen species modulator 1(ROMO1)
BC140813	Homo sapiens	sodium voltage-gated channel alpha subunit 5(SCN5A)
BC114525	Homo sapiens	prominin 2(PROM2)
BC001843	Homo sapiens	YY1 associated protein 1(YY1AP1)
BC136797	Homo sapiens	natural killer cell cytotoxicity receptor 3 ligand 1(NCR3LG1)
AL834443	Homo sapiens	CAP-Gly domain containing linker protein family member 4(CLIP4)
AB012644	Homo sapiens	transporter 1, ATP binding cassette subfamily B member(TAP1)
AK122681	Homo sapiens	cysteine sulfinic acid decarboxylase(CSAD)
BX648157	Homo sapiens	PH domain and leucine rich repeat protein phosphatase 2(PHLPP2)
BX648153	Homo sapiens	WD repeat and FYVE domain containing 3(WDFY3)
M59916	Homo sapiens	sphingomyelin phosphodiesterase 1(SMPD1)
BC016954	Homo sapiens	uncharacterized LOC101929372(LOC101929372)
AK304221	Homo sapiens	mutS homolog 5(MSH5)
AK304228	Homo sapiens	ring finger protein 145(RNF145)
AB080747	Homo sapiens	forkhead box P4(FOXP4)
DQ138290	Homo sapiens	triokinase and FMN cyclase(TKFC)
M75110	Homo sapiens	ATPase H+/K+ transporting subunit beta(ATP4B)
AK027272	Homo sapiens	ATPase family AAA domain containing 2B(ATAD2B)
BC039602	Homo sapiens	roundabout guidance receptor 4(ROBO4)
JN900492	Homo sapiens	tumor protein p53(TP53)
AK054850	Homo sapiens	NBPF member 11(NBPF11)
BC014303	Homo sapiens	solute carrier family 39 member 1(SLC39A1)
AK096693	Homo sapiens	toll interacting protein(TOLLIP)
DQ884396	Homo sapiens	insulin like growth factor binding protein 3(IGFBP3)
BC024593	Homo sapiens	nudix hydrolase 3(NUDT3)
DQ884397	Homo sapiens	insulin like growth factor binding protein 3(IGFBP3)
AK094035	Homo sapiens	AI894139 pseudogene(LOC155060)
BC071770	Homo sapiens	TMCO1 antisense RNA 1(TMCO1-AS1)
BC053903	Homo sapiens	SLIT-ROBO Rho GTPase activating protein 1(SRGAP1)
AK096698	Homo sapiens	LBX1 antisense RNA 1(LBX1-AS1)
BC077076	Homo sapiens	endothelin converting enzyme 1(ECE1)
BC090057	Homo sapiens	ubiquinol-cytochrome c reductase complex assembly factor 3(UQCC3)
AF212241	Homo sapiens	eukaryotic translation initiation factor 2A(EIF2A)
AK293038	Homo sapiens	synaptotagmin like 1(SYTL1)
AK301177	Homo sapiens	CD22 molecule(CD22)
AY692424	Homo sapiens	ADAM metallopeptidase with thrombospondin type 1 motif 6(ADAMTS6)
CR627462	Homo sapiens	ankyrin repeat and SOCS box containing 6(ASB6)
BC069466	Homo sapiens	fatty acid binding protein 2(FABP2)
AY692423	Homo sapiens	ADAM metallopeptidase with thrombospondin type 1 motif 6(ADAMTS6)
BC069465	Homo sapiens	nitric oxide synthase 3(NOS3)
AK094041	Homo sapiens	SEC16 homolog A, endoplasmic reticulum export factor(SEC16A)
FJ207420	Homo sapiens	tumor protein p53(TP53)
AK095377	Homo sapiens	F-box and WD repeat domain containing 2(FBXW2)
AK313157	Homo sapiens	solute carrier family 3 member 1(SLC3A1)
BC015650	Homo sapiens	solute carrier family 37 member 4(SLC37A4)
BX648136	Homo sapiens	toll interacting protein(TOLLIP)
AK298742	Homo sapiens	selectin P ligand(SELPLG)
AF183187	Homo sapiens	otoferlin(OTOF)
AF183186	Homo sapiens	otoferlin(OTOF)
BC150268	Homo sapiens	SPT6 homolog, histone chaperone and transcription elongation factor(SUPT6H)
AK222896	Homo sapiens	CD40 molecule(CD40)
AL136863	Homo sapiens	WD repeat domain 24(WDR24)
BC063294	Homo sapiens	nitric oxide synthase 3(NOS3)
BC150263	Homo sapiens	cordon-bleu WH2 repeat protein(COBL)
BC063297	Homo sapiens	ring finger protein 44(RNF44)
AF183185	Homo sapiens	otoferlin(OTOF)
AK302418	Homo sapiens	BUB1 mitotic checkpoint serine/threonine kinase(BUB1)
DQ256131	Homo sapiens	nitric oxide synthase 3(NOS3)
DQ256130	Homo sapiens	nitric oxide synthase 3(NOS3)
AL050081	Homo sapiens	YTH N6-methyladenosine RNA binding protein 3(YTHDF3)
AK055325	Homo sapiens	PNMA family member 2(PNMA2)
U28369	Homo sapiens	semaphorin 3B(SEMA3B)
AF047471	Homo sapiens	BUB1 mitotic checkpoint serine/threonine kinase(BUB1)
AK056666	Homo sapiens	zinc finger protein 488(ZNF488)
AB093206	Homo sapiens	Ras association domain family member 8(RASSF8)
AK309035	Homo sapiens	enolase superfamily member 1(ENOSF1)
BC150253	Homo sapiens	semaphorin 6D(SEMA6D)
DQ256129	Homo sapiens	nitric oxide synthase 3(NOS3)
BC108718	Homo sapiens	kinesin family member 27 pseudogene(LOC389765)
AK125760	Homo sapiens	LAS1 like ribosome biogenesis factor(LAS1L)
AK023724	Homo sapiens	helicase with zinc finger 2(HELZ2)
AB035335	Homo sapiens	T cell leukemia/lymphoma 6(TCL6)
AB024691	Homo sapiens	coiled-coil domain containing 125(CCDC125)
AB035334	Homo sapiens	T cell leukemia/lymphoma 6(TCL6)
AB035333	Homo sapiens	T cell leukemia/lymphoma 6(TCL6)
AB035332	Homo sapiens	T cell leukemia/lymphoma 6(TCL6)
AB024692	Homo sapiens	coiled-coil domain containing 125(CCDC125)
AK312686	Homo sapiens	cytochrome P450 family 1 subfamily B member 1(CYP1B1)
AK298738	Homo sapiens	selectin P ligand(SELPLG)
AK055337	Homo sapiens	zinc finger protein 213(ZNF213)
AK125761	Homo sapiens	golgi reassembly stacking protein 2(GORASP2)
AK293048	Homo sapiens	cAMP responsive element binding protein 3 like 2(CREB3L2)
AK094947	Homo sapiens	KIAA1755(KIAA1755)
BC150246	Homo sapiens	WD repeat and FYVE domain containing 3(WDFY3)
BX648164	Homo sapiens	FYVE, RhoGEF and PH domain containing 2(FGD2)
BC137278	Homo sapiens	ASXL transcriptional regulator 1(ASXL1)
BC042371	Homo sapiens	potassium channel tetramerization domain containing 1(KCTD1)
BC142626	Homo sapiens	collagen type IV alpha 1 chain(COL4A1)
BC063277	Homo sapiens	nephrocystin 3(NPHP3)
KU178670	Homo sapiens	BTG3 associated nuclear protein(BANP)
BC115039	Homo sapiens	myocardin related transcription factor A(MRTFA)
HM005420	Homo sapiens	capping protein regulator and myosin 1 linker 1(CARMIL1)
U46010	Homo sapiens	hepatocyte growth factor(HGF)
AK225909	Homo sapiens	fibroblast growth factor receptor 4(FGFR4)
AK094912	Homo sapiens	forkhead box P4(FOXP4)
AK056686	Homo sapiens	uncharacterized LOC105376714(LOC105376714)
BC137280	Homo sapiens	ASXL transcriptional regulator 1(ASXL1)
KU178664	Homo sapiens	BTG3 associated nuclear protein(BANP)
AK310002	Homo sapiens	receptor associated protein of the synapse(RAPSN)
KU178665	Homo sapiens	BTG3 associated nuclear protein(BANP)
KU178666	Homo sapiens	BTG3 associated nuclear protein(BANP)
KU178667	Homo sapiens	BTG3 associated nuclear protein(BANP)
BC137286	Homo sapiens	centriolin(CNTRL)
BC041030	Homo sapiens	FA complementation group C(FANCC)
BC137284	Homo sapiens	centriolin(CNTRL)
AK124450	Homo sapiens	homer scaffold protein 3(HOMER3)
U03056	Homo sapiens	hyaluronidase 1(HYAL1)
BC063291	Homo sapiens	desmocollin 2(DSC2)
AK023706	Homo sapiens	N-terminal EF-hand calcium binding protein 3(NECAB3)
BC115027	Homo sapiens	claspin(CLSPN)
BC080605	Homo sapiens	long intergenic non-protein coding RNA 537(LINC00537)
U60319	Homo sapiens	homeostatic iron regulator(HFE)
AK090563	Homo sapiens	chloride channel CLIC like 1(CLCC1)
BC054341	Homo sapiens	ubiquitin conjugating enzyme E2 G2(UBE2G2)
KU178668	Homo sapiens	BTG3 associated nuclear protein(BANP)
KU178669	Homo sapiens	BTG3 associated nuclear protein(BANP)
BC090882	Homo sapiens	WBP11 pseudogene 1(WBP11P1)
AK098491	Homo sapiens	RPA interacting protein(RPAIN)
AK297454	Homo sapiens	zinc finger protein 213(ZNF213)
X65644	Homo sapiens	HIVEP zinc finger 2(HIVEP2)
BC071713	Homo sapiens	transcription factor AP-2 alpha(TFAP2A)
BC101299	Homo sapiens	paired box 3(PAX3)
AK222851	Homo sapiens	gon-4 like(GON4L)
AB209490	Homo sapiens	macroH2A.1 histone(MACROH2A1)
BC037803	Homo sapiens	neurofilament light chain(NEFL)
AK293091	Homo sapiens	olfactory receptor family 51 subfamily E member 1(OR51E1)
AK125792	Homo sapiens	NBPF member 25, pseudogene(NBPF25P)
AK289834	Homo sapiens	zinc finger protein 213(ZNF213)
BC000594	Homo sapiens	lysyl oxidase like 2(LOXL2)
AK290828	Homo sapiens	amidohydrolase domain containing 1(AMDHD1)
AK313101	Homo sapiens	cadherin 16(CDH16)
BC034765	Homo sapiens	small regulatory polypeptide of amino acid response(SPAAR)
AK125798	Homo sapiens	contactin 6(CNTN6)
D80012	Homo sapiens	ubiquitin specific peptidase 10(USP10)
CR456555	Homo sapiens	Rac family small GTPase 2(RAC2)
AK293089	Homo sapiens	CD209 molecule(CD209)
AK298771	Homo sapiens	golgi reassembly stacking protein 2(GORASP2)
AK302442	Homo sapiens	zinc finger protein 487(ZNF487)
BC022798	Homo sapiens	TATA-box binding protein associated factor 7(TAF7)
AK128839	Homo sapiens	lanosterol synthase(LSS)
BC137266	Homo sapiens	olfactory receptor family 2 subfamily G member 6(OR2G6)
AK097179	Homo sapiens	FERM domain containing 1(FRMD1)
AK097172	Homo sapiens	synaptotagmin like 1(SYTL1)
AK123140	Homo sapiens	C-type lectin domain family 4 member G pseudogene 1(CLEC4GP1)
BC003612	Homo sapiens	adaptor related protein complex 1 subunit mu 2(AP1M2)
AK290817	Homo sapiens	E74 like ETS transcription factor 5(ELF5)
AK001518	Homo sapiens	regulation of nuclear pre-mRNA domain containing 1A(RPRD1A)
AK056628	Homo sapiens	sorbin and SH3 domain containing 2(SORBS2)
BC034775	Homo sapiens	proline rich 18(PRR18)
AK296118	Homo sapiens	serine incorporator 2(SERINC2)
BC150206	Homo sapiens	5-oxoprolinase, ATP-hydrolysing(OPLAH)
AK057964	Homo sapiens	fuzzy planar cell polarity protein(FUZ)
AF289554	Homo sapiens	GRB10 interacting GYF protein 1(GIGYF1)
BC143910	Homo sapiens	dynein heavy chain domain 1(DNHD1)
AK303765	Homo sapiens	cell migration inducing hyaluronidase 2(CEMIP2)
AK289852	Homo sapiens	phospholipase C epsilon 1(PLCE1)
AY358083	Homo sapiens	roundabout guidance receptor 4(ROBO4)
AK023754	Homo sapiens	hes family bHLH transcription factor 2(HES2)
BC003601	Homo sapiens	DnaJ heat shock protein family (Hsp40) member C7(DNAJC7)
BC080656	Homo sapiens	minichromosome maintenance 8 homologous recombination repair factor(MCM8)
BC137224	Homo sapiens	zinc finger protein 648(ZNF648)
BC140874	Homo sapiens	ecto-NOX disulfide-thiol exchanger 2(ENOX2)
AF034102	Homo sapiens	solute carrier family 29 member 2(SLC29A2)
AF107403	Homo sapiens	otoferlin(OTOF)
BC140872	Homo sapiens	interferon lambda receptor 1(IFNLR1)
BC140871	Homo sapiens	RAP1 GTPase activating protein 2(RAP1GAP2)
BC140870	Homo sapiens	RAP1 GTPase activating protein 2(RAP1GAP2)
AK296133	Homo sapiens	solute carrier family 5 member 9(SLC5A9)
AK056643	Homo sapiens	family with sequence similarity 124 member A(FAM124A)
AL833172	Homo sapiens	PR/SET domain 10(PRDM10)
BC137245	Homo sapiens	olfactory receptor family 2 subfamily G member 6(OR2G6)
AF229059	Homo sapiens	NLR family pyrin domain containing 1(NLRP1)
BC004922	Homo sapiens	endonuclease G(ENDOG)
AF229062	Homo sapiens	NLR family pyrin domain containing 1(NLRP1)
AF229060	Homo sapiens	NLR family pyrin domain containing 1(NLRP1)
BC004929	Homo sapiens	hydroxy-delta-5-steroid dehydrogenase, 3 beta- and steroid delta-isomerase 7(HSD3B7)
AF229061	Homo sapiens	NLR family pyrin domain containing 1(NLRP1)
BC032130	Homo sapiens	asialoglycoprotein receptor 1(ASGR1)
AK315738	Homo sapiens	F-box and WD repeat domain containing 5(FBXW5)
AK311405	Homo sapiens	solute carrier family 11 member 1(SLC11A1)
AK289870	Homo sapiens	potassium channel tetramerization domain containing 1(KCTD1)
BC106029	Homo sapiens	ubiquitin specific peptidase 19(USP19)
AK300755	Homo sapiens	kelch like family member 20(KLHL20)
S72904	Homo sapiens	ecto-NOX disulfide-thiol exchanger 2(ENOX2)
AL832622	Homo sapiens	NBPF member 11(NBPF11)
BC004118	Homo sapiens	SS nuclear autoantigen 1(SSNA1)
M95548	Homo sapiens	solute carrier family 3 member 1(SLC3A1)
BX648905	Homo sapiens	zinc finger MYM-type containing 2(ZMYM2)
BC106038	Homo sapiens	SRY-box transcription factor 13(SOX13)
X83543	Homo sapiens	shroom family member 2(SHROOM2)
AK091025	Homo sapiens	chromosome 20 open reading frame 203(C20orf203)
AK124388	Homo sapiens	N-terminal EF-hand calcium binding protein 3(NECAB3)
AK307391	Homo sapiens	polypeptide N-acetylgalactosaminyltransferase 3(GALNT3)
BC038368	Homo sapiens	long intergenic non-protein coding RNA 2028(LINC02028)
AB209467	Homo sapiens	calcium voltage-gated channel subunit alpha1 B(CACNA1B)
AK312728	Homo sapiens	ssemaphorin 4F(SEMA4F)
AK057112	Homo sapiens	testis-specific transcript, Y-linked 14(TTTY14)
BC004111	Homo sapiens	aldo-keto reductase family 7 member A2(AKR7A2)
AK289861	Homo sapiens	Ras association domain family member 5(RASSF5)
BC106022	Homo sapiens	endothelin converting enzyme 1(ECE1)
AK128753	Homo sapiens	ORAI calcium release-activated calcium modulator 2(ORAI2)
AK000229	Homo sapiens	zinc finger CCHC-type containing 2(ZCCHC2)
AF070532	Homo sapiens	SPT6 homolog, histone chaperone and transcription elongation factor(SUPT6H)
BC018785	Homo sapiens	leucine rich repeat containing 29(LRRC29)
AK307384	Homo sapiens	DEAD-box helicase 55(DDX55)
AK222823	Homo sapiens	transporter 2, ATP binding cassette subfamily B member(TAP2)
AK312721	Homo sapiens	nudix hydrolase 21(NUDT21)
AK127425	Homo sapiens	steroid receptor associated and regulated protein(SRARP)
AB209475	Homo sapiens	protein kinase C alpha(PRKCA)
BC090930	Homo sapiens	synergin gamma(SYNRG)
U18932	Homo sapiens	N-deacetylase and N-sulfotransferase 1(NDST1)
BC028110	Homo sapiens	U2 snRNP associated SURP domain containing(U2SURP)
X51973	Homo sapiens	glycophorin C (Gerbich blood group)(GYPC)
BC028111	Homo sapiens	HIVEP zinc finger 1(HIVEP1)
BC063311	Homo sapiens	ring finger protein 144B(RNF144B)
AK093662	Homo sapiens	centrosomal protein 128(CEP128)
AK127430	Homo sapiens	neurofilament light chain(NEFL)
AF346509	Homo sapiens	nuclear factor of activated T cells 5(NFAT5)
AK092334	Homo sapiens	lanosterol synthase(LSS)
AF206328	Homo sapiens	YY1 associated protein 1(YY1AP1)
AK091006	Homo sapiens	phosphatidylinositol specific phospholipase C X domain containing 1(PLCXD1)
BC106051	Homo sapiens	glycophorin C (Gerbich blood group)(GYPC)
AK128761	Homo sapiens	agrin(AGRN)
AK127434	Homo sapiens	uncharacterized LOC100129215(LOC100129215)
AB209489	Homo sapiens	transformation/transcription domain associated protein(TRRAP)
AK057134	Homo sapiens	uncharacterized LOC105379395(LOC105379395)
AF070550	Homo sapiens	endosomal transmembrane epsin interactor 3(ENTREP3)
BC150199	Homo sapiens	mannosidase endo-alpha(MANEA)
EF174603	Homo sapiens	solute carrier family 6 member 3(SLC6A3)
AB060338	Homo sapiens	Ras and Rab interactor 3(RIN3)
AK300724	Homo sapiens	6-phosphofructo-2-kinase/fructose-2,6-biphosphatase 1(PFKFB1)
AK293902	Homo sapiens	solute carrier family 13 member 3(SLC13A3)
BC050029	Homo sapiens	poly(A)-specific ribonuclease(PARN)
AK123080	Homo sapiens	LETM1 domain containing 1(LETMD1)
AK096707	Homo sapiens	HOP homeobox(HOPX)
AL136816	Homo sapiens	SHANK associated RH domain interactor(SHARPIN)
BC017479	Homo sapiens	tubulin folding cofactor C(TBCC)
AY066021	Homo sapiens	solute carrier family 1 member 2(SLC1A2)
AJ317973	Homo sapiens	ataxin 2 like(ATXN2L)
AJ317972	Homo sapiens	ataxin 2 like(ATXN2L)
AJ317974	Homo sapiens	ataxin 2 like(ATXN2L)
AJ317971	Homo sapiens	ataxin 2 like(ATXN2L)
AJ317970	Homo sapiens	ataxin 2 like(ATXN2L)
BC034809	Homo sapiens	PH domain containing endocytic trafficking adaptor 1(PHETA1)
AK126120	Homo sapiens	synaptotagmin like 1(SYTL1)
AK292603	Homo sapiens	dynein axonemal intermediate chain 3(DNAI3)
AK123092	Homo sapiens	beta-1,4-galactosyltransferase 7(B4GALT7)
AF098915	Homo sapiens	SRY-box transcription factor 13(SOX13)
BX648946	Homo sapiens	succinate dehydrogenase complex assembly factor 2(SDHAF2)
CR542161	Homo sapiens	cleavage and polyadenylation specific factor 4(CPSF4)
U01244	Homo sapiens	fibulin 1(FBLN1)
BX648944	Homo sapiens	PR/SET domain 10(PRDM10)
AK127457	Homo sapiens	GRAM domain containing 1B(GRAMD1B)
KU159426	Homo sapiens	nuclear transcription factor Y subunit alpha(NFYA)
AL050157	Homo sapiens	family with sequence similarity 32 member A(FAM32A)
AB451258	Homo sapiens	protein kinase C alpha(PRKCA)
AB073655	Homo sapiens	transmembrane and coiled-coil domain family 3(TMCC3)
BC010852	Homo sapiens	aldo-keto reductase family 7 member A2(AKR7A2)
BC143887	Homo sapiens	homeostatic iron regulator(HFE)
BC067740	Homo sapiens	2-aminoethanethiol dioxygenase(ADO)
AF070572	Homo sapiens	transmembrane protein 8B(TMEM8B)
AK300787	Homo sapiens	guanine monophosphate synthase(GMPS)
BC042420	Homo sapiens	aldo-keto reductase family 7 member A3(AKR7A3)
AK000266	Homo sapiens	glutamine rich 1(QRICH1)
AK093652	Homo sapiens	uncharacterized LOC286437(LOC286437)
AK293927	Homo sapiens	YJU2 splicing factor homolog B(YJU2B)
AY358830	Homo sapiens	leucine rich repeat and sterile alpha motif containing 1(LRSAM1)
BC003696	Homo sapiens	SPT6 homolog, histone chaperone and transcription elongation factor(SUPT6H)
X01655	Homo sapiens	collagen type III alpha 1 chain(COL3A1)
D78579	Homo sapiens	nuclear receptor subfamily 4 group A member 3(NR4A3)
AK093659	Homo sapiens	peptidylprolyl isomerase E like pseudogene(PPIEL)
AL136835	Homo sapiens	toll interacting protein(TOLLIP)
AK311433	Homo sapiens	ring finger protein 145(RNF145)
AB451261	Homo sapiens	U2 small nuclear RNA auxiliary factor 2(U2AF2)
BC051374	Homo sapiens	sodium voltage-gated channel alpha subunit 5(SCN5A)
AK126138	Homo sapiens	copine 2(CPNE2)
BX648953	Homo sapiens	dual specificity phosphatase 22(DUSP22)
BX648950	Homo sapiens	homeobox containing 1(HMBOX1)
AL136840	Homo sapiens	minichromosome maintenance 10 replication initiation factor(MCM10)
AK309108	Homo sapiens	contactin 2(CNTN2)
AB665284	Homo sapiens	tetratricopeptide repeat domain 28(TTC28)
AK000231	Homo sapiens	SNF related kinase(SNRK)
BC003692	Homo sapiens	SPT6 homolog, histone chaperone and transcription elongation factor(SUPT6H)
AY147849	Homo sapiens	MIB E3 ubiquitin protein ligase 1(MIB1)
AK025533	Homo sapiens	calmodulin regulated spectrin associated protein 1(CAMSAP1)
AF167160	Homo sapiens	protein inhibitor of activated STAT 1(PIAS1)
BC001025	Homo sapiens	RNA terminal phosphate cyclase like 1(RCL1)
AK094951	Homo sapiens	DDHD domain containing 2(DDHD2)
BC096276	Homo sapiens	solute carrier family 13 member 2(SLC13A2)
BC096277	Homo sapiens	solute carrier family 13 member 2(SLC13A2)
BC096278	Homo sapiens	solute carrier family 13 member 2(SLC13A2)
BX648923	Homo sapiens	ankyrin repeat and SOCS box containing 6(ASB6)
AB052765	Homo sapiens	SHANK associated RH domain interactor(SHARPIN)
Y15572	Homo sapiens	RAD51 paralog D(RAD51D)
AB051432	Homo sapiens	G protein subunit beta 1 like(GNB1L)
AB052764	Homo sapiens	SHANK associated RH domain interactor(SHARPIN)
AB016224	Homo sapiens	RAD51 paralog D(RAD51D)
[truncated: 2,331 more rows]
