# Supplementary material for: piRNAs in the human retina and retinal pigment epithelium reveal a potential role in intracellular trafficking and oxidative stress
Source: Royal Society of Chemistry journal article supplement (doi:10.1039/d3mo00122a), 2024-01-15
Supplement: d3mo00122a6.xlsx [file d3mo00122a6.xlsx]

## Sheet: Total list
piRNA Name	mRNA targets	Correlation coefficient
piR-hsa-28419	PLK3	0.832024
piR-hsa-28405	PLK3	0.831928
piR-hsa-28401	PLK3	0.831287
piR-hsa-28392	PLK3	0.830662
piR-hsa-28391	PLK3	0.829714
piR-hsa-1282	NEDD9	0.736601
piR-hsa-26947	SLC34A3	0.698275
piR-hsa-1823	MCM8	0.681717
piR-hsa-31238	ANKRD10	0.642806
piR-hsa-12423	OPN3	0.636371
piR-hsa-32201	SDHAF2	0.609539
piR-hsa-32194	SDHAF2	0.60574
piR-hsa-32165	SDHAF2	0.599856
piR-hsa-1254	SDHAF2	0.595044
piR-hsa-32165	SNHG12	0.59149
piR-hsa-1254	SNHG12	0.590783
piR-hsa-32641	ZNF75A	0.59072
piR-hsa-32194	SNHG12	0.589968
piR-hsa-963	ZNF217	0.583127
piR-hsa-28527	RASSF8	0.575369
piR-hsa-26947	SLIT3	0.560157
piR-hsa-32201	ZNF75A	0.55595
piR-hsa-26947	ROBO4	0.552357
piR-hsa-5938	MYH10	0.532869
piR-hsa-5937	MYH10	0.532866
piR-hsa-24672	SOCS3	0.529381
piR-hsa-32194	ZNF75A	0.526558
piR-hsa-32154	ZNF75A	0.524779
piR-hsa-32165	ZNF75A	0.522687
piR-hsa-31238	LINC00265	0.520129
piR-hsa-26131	COBL	0.517827
piR-hsa-31237	LINC00265	0.517217
piR-hsa-12423	MAML1	0.5111
piR-hsa-25447	HIVEP2	0.506511
piR-hsa-27493	TBC1D25	-0.502153
piR-hsa-317	SYPL1	-0.502461
piR-hsa-515	SYPL1	-0.50802
piR-hsa-6839	NEMF	-0.513421
piR-hsa-32153	SAG	-0.515243
piR-hsa-32194	MCM9	-0.519702
piR-hsa-31237	COMMD2	-0.52011
piR-hsa-4947	NEMF	-0.520786
piR-hsa-31238	COMMD2	-0.520895
piR-hsa-1254	EFCAB10	-0.521215
piR-hsa-26754	ECE1	-0.526784
piR-hsa-32201	MCM9	-0.529137
piR-hsa-27140	SYT12	-0.53208
piR-hsa-23679	ADAMTS6	-0.532561
piR-hsa-28391	ZFHX2	-0.545979
piR-hsa-28392	ZFHX2	-0.546105
piR-hsa-28401	ANKIB1	-0.54999
piR-hsa-28405	ANKIB1	-0.550839
piR-hsa-28419	ANKIB1	-0.551142
piR-hsa-5370	SRFBP1	-0.558808
piR-hsa-4947	ZNF664	-0.562035
piR-hsa-12206	NALCN	-0.578361
piR-hsa-26131	SLC43A2	-0.593945
piR-hsa-31237	TRIM37	-0.600139
piR-hsa-31238	TRIM37	-0.602139
piR-hsa-28819	NTNG2	-0.611489
piR-hsa-31237	MAPK14	-0.613096
piR-hsa-31238	MAPK14	-0.615474
piR-hsa-25447	NMNAT3	-0.621747
piR-hsa-23786	RAB22A	-0.700633
piR-hsa-31238	RNF44	-0.743918
piR-hsa-31237	GRAMD1C	-0.764568
piR-hsa-31238	GRAMD1C	-0.7668

## Sheet: Anti-correlated pairs
mRNA targets	piRNA Name	Correlation coefficient	Name of the protein encoded by the mRNA	Functions of the protein	Motif enrichment	piRNA origin
GRAMD1C	piR-hsa-31238	-0.7668	Protein Aster C	Sterol transporter activity	No motif	Intergenic, Repeat
	piR-hsa-31237	-0.764568			No motif	Intergenic, Repeat
RNF44	piR-hsa-31238	-0.743918	Ring finger protein 44	Protein ubiquitination		Intergenic, Repeat
RAB22A	piR-hsa-23786	-0.700633	Ras related protein	Endocytosis and intracellular protein transport	1st motif	SNORD17
NMNAT3	piR-hsa-25447	-0.621747	Nicotinamide/nicotinic acid mononucleotide adenylyltransferase 3	nucleotidyltransferase activity, nucleotide biosynthetic process		5'UTR
MAPK14	piR-hsa-31238	-0.615474	Mitogen activated protein kinase	regulation of MAP kinase activity		Intergenic, Repeat
	piR-hsa-31237	-0.613096				Intergenic, Repeat
NTNG2	piR-hsa-28819	-0.611489	Netrin G2	Axonogenesis, cell substrate adhesion,	2nd, 3rd motifs	tRNA-Ala
TRIM37	piR-hsa-31238	-0.602139	E3 ubiquitin-protein ligase	ubiquitin-like protein ligase binding, I-kappaB kinase/NF-kappaB signaling, response to tumor necrosis factor		Intergenic, Repeat
	piR-hsa-31237	-0.600139				Intergenic, Repeat
SLC43A2	piR-hsa-26131	-0.593945	Large neutral amino acids transporter small subunit 4	Amino acid transport		miR-182
NALCN	piR-hsa-12206	-0.578361	Sodium leak channel	voltage-gated cation channel activity, regulation of synaptic transmission	1st motif	SNORD17
ZNF664	piR-hsa-4947	-0.562035	Zinc finger protein	Transcriptional regulation		Lnc-TRIM55-1
SRFBP1	piR-hsa-5370	-0.558808	Serum response factor binding protein	ribosome biogenesis, rRNA metabolic process	4th motif	SNORD8
ANKIB1	piR-hsa-28419	-0.551142	Ankyrin repeat and IBR domain-containing protein 1	positive regulation of proteasomal ubiquitin-dependent protein catabolic process	2nd, 3rd motif	tRNA-Ala
	piR-hsa-28405	-0.550839			2nd, 3rd motif	tRNA-Ala
	piR-hsa-28401	-0.54999			2nd, 3rd motif	tRNA-Ala
ZFHX2	piR-hsa-28392	-0.546105	Zinc finger homeobox protein 2	Regulation of neuron differentiation, regulation of sensory perception of pain, regulation of transcription by RNA polymerase II	2nd, 3rd motif	tRNA-Ala
	piR-hsa-28391	-0.545979			2nd motif	tRNA-Ala
ADAMTS6	piR-hsa-23679	-0.532561	A disintegrin and metalloproteinase with thrombospondin motifs 6	metallopeptidase activity, extracellular matrix organization		Intergenic, Repeat
SYT12	piR-hsa-27140	-0.53208	Synaptotagmin 12	calcium-ion regulated exocytosis, SNARE binding, Essential for mossy-fiber long-term potentiation in the hippocampus		Intergenic, Repeat
MCM9	piR-hsa-32201	-0.529137	DNA helicase	DNA damage response, double-strand break repair via homologous recombination, mismatch repair involved in maintenance of fidelity involved in DNA-dependent DNA replication		Lnc-TIGD7-2, lnc-NEMF-1
ECE1	piR-hsa-26754	-0.526784	Endothelin-converting enzyme 1	positive regulation of receptor recycling, endothelin maturation, regulation of vasoconstriction,		Repeat
EFCAB10	piR-hsa-1254	-0.521215	EF-hand calcium-binding domain-containing protein 10	Calcium ion binding		Lnc-TIGD7-2
COMMD2	piR-hsa-31238	-0.520895	COMM domain-containing protein 2	cullin-RING ubiquitin ligase complex, vesicle-mediated transport to the plasma membrane, post-Golgi vesicle-mediated transport		Intergenic, Repeat
NEMF	piR-hsa-4947	-0.520786	Ribosome quality control complex subunit	ribosome-associated ubiquitin-dependent protein catabolic process, rescue of stalled ribosome		Intergenic, Repeat
COMMD2	piR-hsa-31237	-0.52011	COMM domain-containing protein 2	cullin-RING ubiquitin ligase complex, vesicle-mediated transport to the plasma membrane, post-Golgi vesicle-mediated transport		Intergenic, Repeat
MCM9	piR-hsa-32194	-0.519702	DNA helicase	DNA damage response, double-strand break repair via homologous recombination, mismatch repair involved in maintenance of fidelity involved in DNA-dependent DNA replication		Lnc-TIGD7-2, lnc-NEMF-1
SAG	piR-hsa-32153	-0.515243	S-arrestin	rhodopsin mediated signaling pathway, G protein-coupled receptor internalization		Lnc-TIGD7-2
NEMF	piR-hsa-6839	-0.513421	Ribosome quality control complex subunit	ribosome-associated ubiquitin-dependent protein catabolic process, rescue of stalled ribosome		Lnc-TRIM55-1
SYPL1	piR-hsa-515	-0.50802	Synaptophysin-like protein 1	SNARE binding, syntaxin binding, chemical synaptic transmission, synaptic vesicle membrane (CC)	1st motif	SNORD98
	piR-hsa-317	-0.502461			1st motif	SNORD98
TBC1D25	piR-hsa-27493	-0.502153	TBC1 domain family member 25	Acts as a GTPase-activating protein specific for RAB33B. Involved in the regulation of autophagosome maturation, the process in which autophagosomes fuse with endosomes and lysosomes.	2nd motif	tRNA-gly

## Sheet: Postively correlated pairs
mRNA targets	piRNA Name	Correlation coefficient	Name of the protein encoded by the mRNA	Functions of the protein	Motif	piRNA Origin
PLK3	piR-hsa-28419	0.832024	Polo like kinase 3	Serine/threonine-protein kinase involved in cell cycle regulation, response to stress and Golgi disassembly, DNA damage response, endomitotic cell cycle, cytoplasmic microtubule organization	2nd, 3rd motif	tRNA-Ala
	piR-hsa-28405	0.831928			2nd, 3rd motif	tRNA-Ala
	piR-hsa-28401	0.831287			2nd, 3rd motif	tRNA-Ala
	piR-hsa-28392	0.830662			2nd, 3rd motif	tRNA-Ala
	piR-hsa-28391	0.829714			2nd motif	tRNA-Ala
NEDD9	piR-hsa-1282	0.736601	Enhancer of filamentation 1	actin filament bundle assembly, cell adhesion, cell migration, integrin-mediated signaling pathway, positive regulation of substrate adhesion-dependent cell spreading,	2nd motif	Repeat, gene and intron
SLC34A3	piR-hsa-26947	0.698275	Sodium-dependent phosphate transport protein 2C	sodium:phosphate symporter activity		Repeat
MCM8	piR-hsa-1823	0.681717	DNA helicase MCM8	Component of the MCM8-MCM9 complex, DNA damage response, double-strand break repair via homologous recombination		Repeat, gene and intron
ANKRD10	piR-hsa-31238	0.642806	Ankyrin repeat domain-containing protein 10			tRNA-lys
OPN3	piR-hsa-12423	0.636371	Opsin-3	cellular response to light stimulus, G protein-coupled receptor signaling pathway, phototransduction, regulation of circadian rhythm		tRNA-Arg
SDHAF2	piR-hsa-32201	0.609539	Succinate dehydrogenase assembly factor 2, mitochondrial	respiratory electron transport chain		Lnc-TIGD7-2, lnc-NEMF-1
	piR-hsa-32194	0.60574				Lnc-TIGD7-2, lnc-NEMF-1
	piR-hsa-32165	0.599856				Lnc-TIGD7-2
	piR-hsa-1254	0.595044				Lnc-TIGD7-2
SNHG12	piR-hsa-32165	0.59149	Small nuclear RNA host gene 12, LncRNA			Lnc-TIGD7-2
	piR-hsa-1254	0.590783				Lnc-TIGD7-2
ZNF75A	piR-hsa-32641	0.59072	Zinc finger protein 75A	Negative regulation of transcription by RNA pol II		Lnc-TIGD7-2, lnc-NEMF-1
SNHG12	piR-hsa-32194	0.589968	Small nuclear RNA host gene 12, LncRNA			Lnc-TIGD7-2, lnc-NEMF-1
ZNF217	piR-hsa-963	0.583127	Zinc finger protein 217	Negative regulation of transcription by RNA pol II		Gene and 5'UTR
RASSF8	piR-hsa-28527	0.575369	Ras association domain-containing protein 8	regulation of protein insertion into mitochondrial membrane involved in apoptotic signaling pathway	2nd motif	tRNA-Glu
SLIT3	piR-hsa-26947	0.560157	Slit homolog 3 protein	Axon guidance, axon extension involved in axon guidance		Repeat
ZNF75A	piR-hsa-32201	0.55595	Zinc finger protein 75A	Negative regulation of transcription by RNA pol II		Repeat, gene and intron
ROBO4	piR-hsa-26947	0.552357	Roundabout homolog 4	angiogenesis, axon guidance, establishment of endothelial barrier, regulation of cell migration		Repeat
MYH10	piR-hsa-5938	0.532869	Myosin heavy chain 10	actomyosin structure organization, cell adhesion, mitotic cytokinesis	2nd motif	tRNA-Glu
	piR-hsa-5937	0.532866			2nd motif	tRNA-Glu
SOCS3	piR-hsa-24672	0.529381	Suppressor of cytokine signaling 3	negative regulation of receptor signaling pathway via JAK-STAT, negative regulation of apoptotic process	2nd motif	tRNA-Glu
ZNF75A	piR-hsa-32194	0.526558	Zinc finger protein 75A	Negative regulation of transcription by RNA pol II		Repeat
	piR-hsa-32154	0.524779				Repeat, gene and intron
	piR-hsa-32165	0.522687				Repeat, gene and intron
LINC00265	piR-hsa-31238	0.520129				tRNA-lys
COBL	piR-hsa-26131	0.517827	Protein cordon-bleu	actin polymerization or depolymerization		miR-182
LINC00265	piR-hsa-31237	0.517217				tRNA-lys
MAML1	piR-hsa-12423	0.5111	Mastermind-like protein 1	Notch signaling pathway, development		Repeat
HIVEP2	piR-hsa-25447	0.506511	Transcription factor HIVEP2	regulation of transcription by RNA polymerase II		Gene, intron, and 5'UTR
