# Supplementary material for: piRNAs in the human retina and retinal pigment epithelium reveal a potential role in intracellular trafficking and oxidative stress
Source: Royal Society of Chemistry journal article supplement (doi:10.1039/d3mo00122a), 2024-01-15
Supplement: d3mo00122a7.xlsx [file d3mo00122a7.xlsx]

## Sheet: piRNA list
Name	Sequence	Length
piR-hsa-26131	TTTGGCAATGGTAGAACTCACACTGGTGAGGT	32
piR-hsa-11360	TGAGGTAGTAGATTGTATAGTTGTGGGGTAGT	32
piR-hsa-11362	TGAGGTAGTAGGTTGTATGGTTTAGAGTTACA	32
piR-hsa-28629	GTCCATGATGATTTCAAGTTATCCCTGTCTGA	32
piR-hsa-1254	AGCCTGAGCAACATAGCGAGACCCCGTCTCTA	32
piR-hsa-1849	ATAGGTTTGGTCCTAGCCTTTCTATTAGCTCT	32
piR-hsa-28322	GGGAGGCCCGGGTTCGTTTCCCGGCCAATGCA	32
piR-hsa-27140	GCCTGGGTAGCTCAGTCGGTAGAGCATCAGAC	32
piR-hsa-12488	CAGAGTGTAGCTTAACACAAAGCACCCAACTG	32
piR-hsa-28877	GTTTCCGTAGTGTAGTGGTCATCACGTTCGCC	32
piR-hsa-25783	TTGGTGGTTCAGTGGTAGAATTCTCGCCTGCC	32
piR-hsa-23637	CGGGAGGCCCGGGTTCGGTTCCCGGCCAATGC	32
piR-hsa-23822	CTCAGTGATGCAATCTCTGTGTGGTTCTGAGA	32
piR-hsa-23821	CTCAGTGATGCAATCTCTGTGTGGTTCTGAAA	32
piR-hsa-28850	GTTCAGTGATGAGGCCTGGAATGTGCGCTGGG	32
piR-hsa-23679	CGTGCTGGGCCCATAACCCAGAGGTCGATGGA	32
piR-hsa-27400	GCAGAGTGGCGCAGCGGAAGCGTGCTGGGCCC	32
piR-hsa-28116	GGCAGAGTGGCGCAGCGGAAGCGTGCTGGGCC	32
piR-hsa-26593	GACGAGGTGGCCGAGTGGTTAAGGCTATGGAC	32
piR-hsa-18287	TGGCGATGAGGAGGTACCTATTGTGTTGAGTA	32
piR-hsa-1359	ATCGAGGCTAGAGTCACGCTTGGGTATCGGCT	32
piR-hsa-31238	TAGAGCATGAGACTCTTAATCTCAGGGTCGTG	32
piR-hsa-28405	GGGGGTGTAGCTCAGTGGTAGAGCGCGTGCTT	32
piR-hsa-5938	TCCCTGGTGGTCTAGTGGTTAGGATTCGGCAC	32
piR-hsa-1282	AGCGTTGGTGGTATAGTGGTGAGCATAGCTGC	32
piR-hsa-12423	CAGAAGATTGAGGGTTCGTGTCCCTTCGTGGT	32
piR-hsa-4947	TCCTTAGGTCGCTGGTTCGATTCCGGCTCGAA	32
piR-hsa-24684	TTCCGTAGTGTAGTGGTTATCACGTTCGCCTC	32
piR-hsa-6145	TCCGTAGTGTAGTGGTTATCACGTTCGCCTCA	32
piR-hsa-6147	TCCGTAGTGTAGTGGTTATCACGTTCGCCTGA	32
piR-hsa-27622	GCCCGGCTAGCTCAGTCGGTAGAGCATGAGAC	32
piR-hsa-1243	AGCCCGGCTAGCTCAGTCGGTAGAGCATGAGA	32
piR-hsa-9491	TGAATCTGACAACAGAGGCTTACGACCCCTTA	32
piR-hsa-28392	GGGGGGTGTAGCTCAGTGGTAGAGCGCGTGCT	32
piR-hsa-27283	GCAATCACTGATGTCTCCATGTCTCTGAGCA	31
piR-hsa-28876	GTTTCCGTAGTGTAGTGGTCATCACGTTCGC	31
piR-hsa-25447	TTGCTGTGATGACTATCTTAGGACACCTTTG	31
piR-hsa-32194	AGCCTGAGCAACATAGCGAGACCCCGTCTCT	31
piR-hsa-27731	GCTAAACCTAGCCCCAAACCCACTCCACCCT	31
piR-hsa-28488	GGTCGCTGGTTCGAATCCGGCTCGAAGGACC	31
piR-hsa-12487	CAGAGTGTAGCTTAACACAAAGCACCCAACT	31
piR-hsa-32165	GCCTGAGCAACATAGCGAGACCCCGTCTCTA	31
piR-hsa-27139	GCCTGGGTAGCTCAGTCGGTAGAGCATCAGA	31
piR-hsa-7193	TCGCCGTGATCGTATAGTGGTTAGTACTCTG	31
piR-hsa-25782	TTGGTGGTTCAGTGGTAGAATTCTCGCCTGC	31
piR-hsa-5370	TCCCAATGATGAGTTGCCATGCTAATACTGA	31
piR-hsa-426	AAGCCAGGGATTGTGGGTTCGGGTCCCATCT	31
piR-hsa-2107	ATTGGTGGTTCAGTGGTAGAATTCTCGCCTG	31
piR-hsa-28849	GTTCAGTGATGAGGCCTGGAATGTGCGCTGG	31
piR-hsa-26686	GAGAAAGCTCACAAGAACTGCTAACTCATGC	31
piR-hsa-23638	CGGGAGGCCCGGGTTCGTTTCCCGGCCAATG	31
piR-hsa-1100	AGAGTTGCGCAGCGGAAGCGTGCTGGGCCCA	31
piR-hsa-12485	CAGAGTCGCGCAGCGGAAGCGTGCTGGGCCC	31
piR-hsa-23317	CCGCCTGGGAATACCGGGTGCTGTAGGCTTA	31
piR-hsa-26590	GACGAGGTGGCCGAGTGGTTAAGGCAATGGA	31
piR-hsa-28374	GGGGATGTAGCTCAGTGGTAGAGCGCATGCT	31
piR-hsa-27513	GCCAAGGTCGCGGGTTCGGTCCCCGTACGGG	31
piR-hsa-28210	GGCGATGAGGAGGTACCTATTGTGTTGAGAA	31
piR-hsa-28875	GTTTAGACGGGCTCACATCACCCCATAAACA	31
piR-hsa-18286	TGGCGATGAGGAGGTACCTATTGTGTTGAGT	31
piR-hsa-31237	TAGAGCATGAGACTCTTAATCTCAGGGTCGT	31
piR-hsa-15023	TGCCCCCATGTCTAACAACATGGCTTTCTCA	31
piR-hsa-24672	TTCCCTGGTGGTCTAGTGGTTAGGATTCGGC	31
piR-hsa-28819	GTGTAGCTCAGTGGTAGAGCGCGTGCTTCGC	31
piR-hsa-963	ACTTGTGATGTCTTCAAAGGAACCACTGATG	31
piR-hsa-2155	CAACAATAGGGTTTACGACCTCGATGTTGGA	31
piR-hsa-6839	TCCTTAGGTCGCTGGTTCGGTTCCGGCTCGA	31
piR-hsa-28419	GGGGTGTAGCTCAGTGGTAGAGAGCGTGCTT	31
piR-hsa-5937	TCCCTGGTGGTCTAGTGGTTAGGATTCGGCA	31
piR-hsa-1207	AGCATTGGTGGTTCAGTGGTAGAATTCTCGC	31
piR-hsa-28131	GGCATTGGTGGTTCAGTGGTAGAATTCTCGC	31
piR-hsa-3405	TCACCCGGCCCGGACACGGACAGGATTGACA	31
piR-hsa-6143	TCCGTAGTGTACTGGTTATCACGTTCGCCTG	31
piR-hsa-2117	ATTTGGTGTATGTGCTTGGCTGAGGAGCCAA	31
piR-hsa-27621	GCCCGGCTAGCTCAGTCGGTAGAGCATGAGA	31
piR-hsa-20613	TGGTGTATGTGCTTGGCTGAGGAGCCAATGG	31
piR-hsa-21622	TGTGAATCTGACAACAGAGGCTTACGACCCC	31
piR-hsa-28391	GGGGGGTGTAGCTCAGTGGTAGAGCGCGTGC	31
piR-hsa-28590	GTAGTCGTGGCCGAGTGGTTAAGGCTATGGA	31
piR-hsa-26754	GAGAGGGGCCCGTGCCTTGGAAAGCGTCGCG	31
piR-hsa-28841	GTTAAGATGGCAGAGCCCGGTAATCGCATAA	31
piR-hsa-1242	AGCCCGGCTAGCTCAGTCGGTAGAGCATGAG	31
piR-hsa-1043	AGACAGGTTAGTTTTACCCTACTGATGATGT	31
piR-hsa-28401	GGGGGTGTAGCTCAGTGGTAGAGAGCGTGCT	31
piR-hsa-11361	TGAGGTAGTAGGTTGTATAGTTTTAGGGTC	30
piR-hsa-12789	CATTGATCATCGACACTTCGAACGCACTTG	30
piR-hsa-28398	GGGGGTATAGCTCAGTGGTAGAGCATTTGA	30
piR-hsa-28394	GGGGGTATAGCTCAGTGGCAGAGCATTTGA	30
piR-hsa-27616	GCCCGGATGATCCTCAGTGGTCTGGGGTGC	30
piR-hsa-24683	TTCCGTAGTGTAGTGGTTATCACGTTCGCC	30
piR-hsa-32201	GCCTGAGCAACATAGCGAGACCCCGTCTCT	30
piR-hsa-1338	AGGGGCTGAATGAAAATGGCCTTTCTGAAC	30
piR-hsa-28487	GGTCGATGATGATTGGTAAAAGGTCTGATA	30
piR-hsa-23786	CTCACAAAGATGAGTGGTGAAAATCTGATC	30
piR-hsa-28848	GTTCAGTGATGAGGCCTGGAATGTGCGCTG	30
piR-hsa-28190	GGCCGTGATCGTATAGTGGTTAGTACTCTG	30
piR-hsa-317	AAATGCAGTGTGGAACACAATGAACTGAAC	30
piR-hsa-1834	ATAACTGACGAAGACTACTCCTGTCTGATT	30
piR-hsa-25781	TTGGTGGTTCAGTGGTAGAATTCTCGCCTG	30
piR-hsa-24775	TTCGATGAAGAGATGATGACGAGTCTGACT	30
piR-hsa-26685	GAGAAAGCTCACAAGAACTGCTAACTCATG	30
piR-hsa-28223	GGCTCGTTGGTCTAGGGGTATGATTCTCGG	30
piR-hsa-28846	GTTCACTGATGAGAGCATTGTTCTGAGCCA	30
piR-hsa-26589	GACGAGGTGGCCGAGTGGTTAAGGCAATGG	30
piR-hsa-28209	GGCGATGAGGAGGTACCTATTGTGTTGAGA	30
piR-hsa-28319	GGGAGATGAAGAGGACAGTGACTGAGAGAC	30
piR-hsa-1823	AGTTCGTGATGGATTTGCTTTTTTCTGATT	30
piR-hsa-2154	CAACAATAGGGTTTACGACCTCGATGTTGG	30
piR-hsa-23619	CGGCTAGCTCAGTCGGTAGAGCATGAGACT	30
piR-hsa-23231	CCCCTGGTGGTCTAGTGGTTAGGATTCGGC	30
piR-hsa-23230	CCCCTGGTCGTCTAGTGGTTAGGATTCGGC	30
piR-hsa-6840	TCCTTAGGTCGCTGGTTCGTTTCCGGCTCG	30
piR-hsa-1593	AGGCTCGTTGGTCTAGTGGTATGATTCTCG	30
piR-hsa-27493	GCATTGGTGGTTCAGTGGTAGAATTCTCAC	30
piR-hsa-6144	TCCGTAGTGTAGTGGTTATCACGTTCGCCT	30
piR-hsa-27620	GCCCGGCTAGCTCAGTCGGTAGAGCATGAG	30
piR-hsa-28403	GGGGGTGTAGCTCAGTGGTAGAGCGCGTGC	30
piR-hsa-28212	GGCGGGAGTAACTATGACTCTCTTAAGGTA	30
piR-hsa-1008	AGAAGATTGAGGGTTCGTGTCCCTTCGTGG	30
piR-hsa-28851	GTTCATGATGACACAGGACCTTGTCTGAAC	30
piR-hsa-32154	CCTGAGCAACATAGCGAGACCCCGTCTCT	29
piR-hsa-32641	GCCTGAGCAACATAGCGAGACCCCGTCTC	29
piR-hsa-28397	GGGGGTATAGCTCAGTGGTAGAGCATTTG	29
piR-hsa-5939	TCCCTGGTTCGATCCCGGGTTTCGGCACC	29
piR-hsa-1580	AGGCCGTGATCGTATAGTGGTTAGTACTC	29
piR-hsa-23884	CTCTACTGAACTGCCATGAGGAAACTGCC	29
piR-hsa-820	ACCTGATGTTACATTGTAGTGTGCTGATG	29
piR-hsa-32153	CTGAGCAACATAGCGAGACCCCGTCTCTA	29
piR-hsa-3178	TCACAAAGATGAGTGGTGAAAATCTGATC	29
piR-hsa-18709	TGGTGGTTCAGTGGTAGAATTCTCGCCTG	29
piR-hsa-515	AATGCAGTGTGGAACACAATGAACTGAAC	29
piR-hsa-25780	TTGGTGGTTCAGTGGTAGAATTCTCGCCT	29
piR-hsa-28402	GGGGGTGTAGCTCAGTGGTAGAGCGCGTG	29
piR-hsa-26681	GAGAAAGCTCACAAGAACTGCTAACTCAC	29
piR-hsa-182	ACAGCAGTTGAACATGGGTCAGTCGGTCC	29
piR-hsa-26947	GAGGGTCCAGGGTTCATGTCCCTGTTCAG	29
piR-hsa-17444	TGGAGGTGATGAACTGTCTGAGCCTGACC	29
piR-hsa-11817	TGATCAGTAGTGGGATCGCGCCTGTGAAT	29
piR-hsa-15022	TGCCCCCATGTCTAACAACATGGCTTTCT	29
piR-hsa-1191	AGCAGTTGAACATGGGTCAGTCGGTCCTG	29
piR-hsa-13893	TGCAGAGTGGCGCAGCGGAAGCGTGCTGG	29
piR-hsa-2106	ATTGGTGGTTCAGTGGTAGAATTCTCGCC	29
piR-hsa-28318	GGGAGATGAAGAGGACAGTGACTGAGAGA	29
piR-hsa-12790	CATTGGTGGTTCAGTGGTAGAATTCTCGC	29
piR-hsa-2138	CAAAGTGATTGGTACCTCGTTGTCTGATG	29
piR-hsa-27619	GCCCGGCTAGCTCAGTCGGTAGAGCATGA	29
piR-hsa-23327	CCGGCTAGCTCAGTCGGTAGAGCATGAGA	29
piR-hsa-32170	GTAGTCGTGGCCGAGTGGTTAAGGCTATG	29
piR-hsa-28527	GGTTCCATGGTGTAATGGTTAGCACTCTG	29
piR-hsa-28478	GGTCAGTCGGTCCTGAGAGATGGGCGAGC	29
piR-hsa-1873	ATCAGACCCCAGAAAAGGTGTTGGTTGAT	29
piR-hsa-1281	AGCGTTGGTGGTATAGTGGTGAGCATAGC	29
piR-hsa-3200	TCACAATGCTGACACTCAAACTGCTGACA	29
piR-hsa-11080	TGAGGAGCCAATGGGGCGAAGCTACCATC	29
piR-hsa-1077	AGAGAGGGGCCCGTGCCTTGGAAAGCGTC	29
piR-hsa-26946	GAGGGGCCCGTGCCTTGGAAAGCGTCGCG	29
piR-hsa-23655	CGTAGTGTAGTGGTCATCACGTTCGCCT	28
piR-hsa-28845	GTTCACTGATGAGAGCATTGTTCTGAGC	28
piR-hsa-7239	TCGCTGGTTCGATTCCGGCTCGAAGGAC	28
piR-hsa-28189	GGCCGTGATCGTATAGTGGTTAGTACTC	28
piR-hsa-32236	CCTGATGTTACATTGTAGTGTGCTGATG	28
piR-hsa-993	AGAACGTGTGGAAAACTAATGACTGAGC	28
piR-hsa-1742	AGTAAGTGAAGATAAAGTGTGTCTGAGG	28
piR-hsa-26039	TTTCTGTGTGGAATTTGAATATCTGAAA	28
piR-hsa-21131	TGTAGTGCGCTATGCCGATCGGGTGTCC	28
piR-hsa-12206	CACAAAGATGAGTGGTGAAAATCTGATC	28
piR-hsa-3961	TCAGTGATGAGGCCTGGAATGTGCGCTG	28
piR-hsa-1944	ATGCAGTGTGGAACACAATGAACTGAAC	28
piR-hsa-12525	CAGCAGTTGAACATGGGTCAGTCGGTCC	28
piR-hsa-23566	CGCGGGTTCGATCCCCGTACGGGCCACC	28
piR-hsa-952	ACTGTGTGCTGATTGTCACGTTCTGATT	28
piR-hsa-28019	GGAGGTGATGAACTGTCTGAGCCTGACC	28
piR-hsa-32745	TGATCAGTAGTGGGATCGCGCCTGTGAA	28
piR-hsa-32591	GATCAGTAGTGGGATCGCGCCTGTGAAT	28
piR-hsa-23289	CCCTGGTAGTCTAGTGGTTAGGATTCGG	28
piR-hsa-7238	TCGCTGGTTCGAATCCGGCTCGGAGGAC	28
piR-hsa-27399	GCAGAGTGGCGCAGCGGAAGCGTGCTGG	28
piR-hsa-26508	GACATTGGTGGTTCAGTGGTAGAATTCT	28
piR-hsa-27124	GCAGTAGCATTGGTGGTTCAGTGGTAGA	28
piR-hsa-28646	GTCGGGTTGCTTGGGAATGCAGCCCAAA	28
piR-hsa-1872	ATCAGACCCCAGAAAAGGTGTTGGTTGA	28
piR-hsa-23330	CCGTAGTGTAGTGGTTATCACGTTCGCC	28
piR-hsa-27282	GCAATAACAGGTCTGTGATGCCCTTAGA	28
piR-hsa-1847	ATAGGGTTTACGACCTCGATGTTGGATC	28
piR-hsa-26371	GAAGGTTGACGAAAATTCTTACTGAGCA	28
piR-hsa-32172	TCACAATGCTGACACTCAAACTGCTGAC	28
piR-hsa-3616	TCAGAAGATTCCAGGTTCGACTCCTGGC	28
piR-hsa-32163	CACAATGCTGACACTCAAACTGCTGACA	28
piR-hsa-27492	GCATTGGTGGTATAGTGGTGAGCATAGC	28
piR-hsa-26747	GAGAGAGGGGCCCGTGCCTTGGAAAGTG	28
piR-hsa-11341	TGAGGGTTCGAGTCCCTTCGTGGTCGCC	28
piR-hsa-23670	CGTGAGTTCGAGCCTCACACGGGGCAC	27
piR-hsa-32299	TTCCGGGTTCGAGTCCCGGCGGAGTCG	27
piR-hsa-23656	CGTAGTGTAGTGGTTATCACGTTCGCC	27
piR-hsa-7201	TCGCGAGTTCAAATCTCGCTGGGGCCT	27
piR-hsa-32207	GTAGTGCGCTATGCCGATCGGGTGTCC	27
piR-hsa-24360	TTCACTGATGAGAGCATTGTTCTGAGC	27
piR-hsa-5067	TCCAGGTTCGACTCCTGGCTGGCTCGC	27
piR-hsa-23574	CGCTGGTTCGATTCCGGCTCGAAGGAC	27
piR-hsa-28188	GGCCGTGATCGTATAGTGGTTAGTACT	27
piR-hsa-20757	TGGTTCAGTGGTAGAATTCTCGCCTCC	27
piR-hsa-32192	TGTAGTGCGCTATGCCGATCGGGTGTC	27
piR-hsa-32157	TGCAGTGTGGAACACAATGAACTGAAC	27
piR-hsa-32196	ATGCAGTGTGGAACACAATGAACTGAA	27
piR-hsa-32177	TGATCAGTAGTGGGATCGCGCCTGTGA	27
piR-hsa-23209	CCCCCCACTGCTAAATTTGACTGGCTA	27
piR-hsa-32658	GATCAGTAGTGGGATCGCGCCTGTGAA	27
piR-hsa-20266	TGGTCGTGGTTGTAGTCCGTGCGAGAA	27
piR-hsa-25046	TTCTGGGTCGGGGTTTCGTACGTAGCA	27
piR-hsa-27007	GAGTAGAGTGCTTAGTTGAACAGGGCC	27
piR-hsa-27398	GCAGAGTGGCGCAGCGGAAGCGTGCTG	27
piR-hsa-32180	TCACAATGCTGACACTCAAACTGCTGA	27
piR-hsa-25779	TTGGTGGTTCAGTGGTAGAATTCTCGC	27
piR-hsa-23919	CTGAACTCCTCACACCCAATTGGACCA	27
piR-hsa-1336	AGGGGCCCGTGCCTTGGAAAGCGTCGC	27
piR-hsa-1219	AGCCAATGGGGCGAAGCTACCATCTGT	27
piR-hsa-25786	TTGGTGTATGTGCTTGGCTGAGGAGCC	27
piR-hsa-32260	CACAATGCTGACACTCAAACTGCTGAC	27
piR-hsa-12454	CAGACCCCAGAAAAGGTGTTGGTTGAT	27
piR-hsa-32175	GTAGTGCGCTATGCCGATCGGGTGTC	26
piR-hsa-32159	CCCCCCACTGCTAAATTTGACTGGCT	26
piR-hsa-32168	TGTAGTGCGCTATGCCGATCGGGTGT	26
piR-hsa-11256	TGAGGCCCCGGGTTCGATCCCCGGCA	26
piR-hsa-28187	GGCCGTGATCGTATAGTGGTTAGTAC	26
piR-hsa-2129	CAAAGATGAGTGGTGAAAATCTGATC	26
piR-hsa-23210	CCCCCCACTGCTAAATTTGACTGGTT	26
piR-hsa-32261	GCAGTGTGGAACACAATGAACTGAAC	26
piR-hsa-5936	TCCCTGGTGGTCTAGTGGTTAGGATA	26
piR-hsa-32182	CCCCCACTGCTAAATTTGACTGGCTA	26
piR-hsa-32213	GATCAGTAGTGGGATCGCGCCTGTGA	26
piR-hsa-32280	ATCAGTAGTGGGATCGCGCCTGTGAA	26
piR-hsa-32252	TCAGTAGTGGGATCGCGCCTGTGAAT	26
piR-hsa-7549	TCTACTGAACTGCCATGAGGAAACTG	26
piR-hsa-32198	GTTCACTGATGAGAGCATTGTTCTGA	26
piR-hsa-32256	CACAATGCTGACACTCAAACTGCTGA	26
piR-hsa-28382	GGGGCGAAGCTACCATCTGTGGGATT	26
piR-hsa-12719	CAGTTGAACATGGGTCAGTCGGTCCT	26
piR-hsa-9010	TGAACATGGGTCAGTCGGTCCTGAGA	26
piR-hsa-32181	TGATCAGTAGTGGGATCGCGCCTGTG	26
piR-hsa-3645	TCAGACATTTGGTGTATGTGCTTGGC	26
piR-hsa-32221	TAGTGCGCTATGCCGATCGGGTGTC	25
piR-hsa-32174	GTAGTGCGCTATGCCGATCGGGTGT	25
piR-hsa-32184	AGTGCGCTATGCCGATCGGGTGTCC	25
piR-hsa-32167	CCCCCACTGCTAAATTTGACTGGCT	25
piR-hsa-32162	CCCCCCACTGCTAAATTTGACTGGC	25
piR-hsa-32238	CCCCCACTGCTAAATTTGACTGGTT	25
piR-hsa-32195	CCCCCCACTGCTAAATTTGACTGGT	25
piR-hsa-32185	TGTAGTGCGCTATGCCGATCGGGTG	25
piR-hsa-32765	TCTACTGAACTGCCATGAGGAAACT	25
piR-hsa-32588	CAGTGTGGAACACAATGAACTGAAC	25
piR-hsa-32176	CACTGATGAGAGCATTGTTCTGAGC	25
piR-hsa-32199	TTCACTGATGAGAGCATTGTTCTGA	25
piR-hsa-32158	CCCCACTGCTAAATTTGACTGGCT	24
piR-hsa-32179	CCCCCACTGCTAAATTTGACTGGC	24
piR-hsa-32161	CCCCCCACTGCTAAATTTGACTGG	24
piR-hsa-32235	CCCCCACTGCTAAATTTGACTGGT	24
piR-hsa-32220	TCTACTGAACTGCCATGAGGAAAC	24
piR-hsa-32187	CCCCCCACTGCTAAATTTGACTG	23
piR-hsa-32160	CCCCCACTGCTAAATTTGACTGG	23
piR-hsa-32186	CCCCACTGCTAAATTTGACTGGT	23
piR-hsa-32538	CTACTGAACTGCCATGAGGAAAC	23
