# Supplementary material for: piRNAs in the human retina and retinal pigment epithelium reveal a potential role in intracellular trafficking and oxidative stress
Source: Royal Society of Chemistry journal article supplement (doi:10.1039/d3mo00122a), 2024-01-15
Supplement: d3mo00122a8.pdf [file d3mo00122a8.pdf]

### piRNA Clusters

| Cluster Number | piRNA Id                                                                                                                                            | Repeat elements                                                                                                     | Chromosomal location | No. of piRNAs |
|----------------|-----------------------------------------------------------------------------------------------------------------------------------------------------|---------------------------------------------------------------------------------------------------------------------|----------------------|---------------|
| Cluster1       | piR-hsa-7193<br>piR-hsa-27619<br>piR-hsa-27620<br>piR-hsa-27622<br>piR-hsa-23327<br>piR-hsa-1243<br>piR-hsa-23619<br>piR-hsa-31237<br>piR-hsa-31238 | tRNA-lys<br>tRNA-lys<br>tRNA-lys<br>tRNA-lys<br>tRNA-lys<br>tRNA-lys<br>tRNA-lys<br>tRNA-lys<br>tRNA-lys            | Chromosome 1         | 9             |
| Cluster2       | piR-hsa-24683 (2)<br>piR-hsa-24684 (2)<br>piR-hsa-23330 (2)<br>piR-hsa-23656 (2)<br>piR-hsa-6144 (2)<br>piR-hsa-6145 (2)                            | tRNA-val<br>tRNA-val<br>tRNA-val<br>tRNA-val<br>tRNA-val<br>tRNA-val                                                | Chromosome 5         | 12            |
| Cluster3       | piR-hsa-23655<br>piR-hsa-28877<br>piR-hsa-28876<br>piR-hsa-7201                                                                                     | tRNA-val<br>tRNA-val<br>tRNA-val<br>tRNA-Thr                                                                        | Chromosome 5         | 4             |
| Cluster4       | piR-hsa-32170<br>piR-hsa-28590<br>piR-hsa-3616<br>piR-hsa-5067<br>piR-hsa-23679<br>piR-hsa-27400<br>piR-hsa-28116<br>piR-hsa-13893                  | tRNA-ser<br>tRNA-ser<br>tRNA-Arg<br><br>tRNA-iMet<br>tRNA-iMet<br>tRNA-iMet                                         | Chromosome 6         | 8             |
| Cluster5       | piR-hsa-23679<br>piR-hsa-27400<br>piR-hsa-28116<br>piR-hsa-13893<br>piR-hsa-27140<br>piR-hsa-27139                                                  | tRNA-iMet<br>tRNA-iMet<br>tRNA-iMet<br>tRNA-iMet<br>tRNA-lys<br>tRNA-lys                                            | Chromosome 6         | 6             |
| Cluster6       | piR-hsa-28319 (2)<br>piR-hsa-28318 (2)                                                                                                              | SNORD 62A<br>SNORD 62B                                                                                              | Chromosome 9         | 4             |
| Cluster7       | piR-hsa-7201<br>piR-hsa-6839<br>piR-hsa-4947<br>piR-hsa-6840                                                                                        | tRNA-Thr<br>tRNA-Tyr<br>tRNA-Tyr                                                                                    | Chromosome 14        | 4             |
| Cluster8       | piR-hsa-21131 (3)<br>piR-hsa-32184 (2)<br>piR-hsa-32207 (2)<br>piR-hsa-32221 (2)<br>piR-hsa-32175 (2)<br>piR-hsa-32174 (2)<br>piR-hsa-32168 (2)     | 7SLRNA-SINE/A<br>7SLRNA-SINE/A<br>7SLRNA-SINE/A<br>7SLRNA-SINE/A<br>7SLRNA-SINE/A<br>7SLRNA-SINE/A<br>7SLRNA-SINE/A |                      | 31            |

|           |                                                                                                                                                                                                                                                                                                                                                                   |                                                                                                                                                                                                                                                                                               |               |    |
|-----------|-------------------------------------------------------------------------------------------------------------------------------------------------------------------------------------------------------------------------------------------------------------------------------------------------------------------------------------------------------------------|-----------------------------------------------------------------------------------------------------------------------------------------------------------------------------------------------------------------------------------------------------------------------------------------------|---------------|----|
|           | piR-hsa-32185 (2)<br>piR-hsa-32194 (1)<br>piR-hsa-32154 (1)<br>piR-hsa-32201 (1)<br>piR-hsa-32641 (1)<br>piR-hsa-32591 (1)<br>piR-hsa-32252 (1)<br>piR-hsa-11817 (1)<br>piR-hsa-32658 (1)<br>piR-hsa-32745 (1)<br>piR-hsa-32280 (1)<br>piR-hsa-32213 (1)<br>piR-hsa-32177 (1)<br>piR-hsa-32181 (1)<br>piR-hsa-32184 (2)<br>piR-hsa-32192 (1)<br>piR-hsa-32185 (2) | 7SLRNA-SINE/A<br>7SLRNA-SINE/A<br>7SLRNA-SINE/A<br>7SLRNA-SINE/A<br>7SLRNA-SINE/A<br>7SLRNA-SINE/A<br>7SLRNA-SINE/A<br>7SLRNA-SINE/A<br>7SLRNA-SINE/A<br>7SLRNA-SINE/A<br>8SLRNA-SINE/A<br>7SLRNA-SINE/A<br>7SLRNA-SINE/A<br>7SLRNA-SINE/A<br>7SLRNA-SINE/A<br>7SLRNA-SINE/A<br>7SLRNA-SINE/A | Chromosome 14 |    |
| Cluster9  | piR-hsa-25783 (4)<br>piR-hsa-25782 (4)<br>piR-hsa-18709 (4)<br>piR-hsa-2107 (4)<br>piR-hsa-25781 (4)<br>piR-hsa-25780 (4)<br>piR-hsa-2106 (4)<br>piR-hsa-12790 (4)<br>piR-hsa-25779 (4)<br>piR-hsa-1207 (3)<br>piR-hsa-28131 (1)                                                                                                                                  | tRNA-Gly<br>tRNA-Gly<br>tRNA-Gly<br>tRNA-Gly<br>tRNA-Gly<br>tRNA-Gly<br>tRNA-Gly<br>tRNA-Gly<br>tRNA-Gly<br>tRNA-Gly<br>tRNA-Gly<br>tRNA-Gly                                                                                                                                                  | Chromosome 16 | 40 |
| Cluster10 | piR-hsa-28394 (2)<br>piR-hsa-28398 (2)<br>piR-hsa-28397 (2)                                                                                                                                                                                                                                                                                                       | tRNA-Cys<br>tRNA-Cys<br>tRNA-Cys                                                                                                                                                                                                                                                              | Chromosome 17 | 6  |
| Cluster11 | piR-hsa-27283<br>piR-hsa-17444<br>piR-hsa-28019                                                                                                                                                                                                                                                                                                                   | SNORD110<br>SNORD57<br>SNORD57                                                                                                                                                                                                                                                                | Chromosome 20 | 3  |
| Cluster12 | piR-hsa-28646<br>piR-hsa-1873<br>piR-hsa-1872<br>piR-hsa-12454<br>piR-hsa-182<br>piR-hsa-12525<br>piR-hsa-1191<br>piR-hsa-12719<br>piR-hsa-9010<br>piR-hsa-28478<br>piR-hsa-26747<br>piR-hsa-1077<br>piR-hsa-26754<br>piR-hsa-26946<br>piR-hsa-1336<br>piR-hsa-28212                                                                                              | LSU-rRNA<br>LSU-rRNA<br>LSU-rRNA<br>LSU-rRNA<br>LSU-rRNA<br>LSU-rRNA<br>LSU-rRNA<br>LSU-rRNA<br>LSU-rRNA<br>LSU-rRNA<br>LSU-rRNA<br>LSU-rRNA<br>LSU-rRNA<br>LSU-rRNA<br>LSU-rRNA                                                                                                              | Chromosome 21 | 25 |

|           |                                                                                                                                                                                                                                                                                                                                                                                                                           |                                                                                                                                                                                                                                                                                                                      |               |    |
|-----------|---------------------------------------------------------------------------------------------------------------------------------------------------------------------------------------------------------------------------------------------------------------------------------------------------------------------------------------------------------------------------------------------------------------------------|----------------------------------------------------------------------------------------------------------------------------------------------------------------------------------------------------------------------------------------------------------------------------------------------------------------------|---------------|----|
|           | piR-hsa-1043<br>piR-hsa-3645<br>piR-hsa-2117<br>piR-hsa-25786<br>piR-hsa-20613<br>piR-hsa-11080<br>piR-hsa-1219<br>piR-hsa-28382<br>piR-hsa-25046                                                                                                                                                                                                                                                                         | LSU-rRNA<br>LSU-rRNA<br>LSU-rRNA<br>LSU-rRNA<br>LSU-rRNA<br>LSU-rRNA<br>LSU-rRNA<br>LSU-rRNA<br>LSU-rRNA                                                                                                                                                                                                             |               |    |
| Cluster13 | piR-hsa-28646<br>piR-hsa-1873<br>piR-hsa-1872<br>piR-hsa-12454<br>piR-hsa-182<br>piR-hsa-12525<br>piR-hsa-1191<br>piR-hsa-12719<br>piR-hsa-9010<br>piR-hsa-28478<br>piR-hsa-26747<br>piR-hsa-1077<br>piR-hsa-26754<br>piR-hsa-26946<br>piR-hsa-1336<br>piR-hsa-28212<br>piR-hsa-1043<br>piR-hsa-3645<br>piR-hsa-2117<br>piR-hsa-25786<br>piR-hsa-20613<br>piR-hsa-11080<br>piR-hsa-1219<br>piR-hsa-28392<br>piR-hsa-25046 | LSU-rRNA<br>LSU-rRNA<br>LSU-rRNA<br>LSU-rRNA<br>LSU-rRNA<br>LSU-rRNA<br>LSU-rRNA<br>LSU-rRNA<br>LSU-rRNA<br>LSU-rRNA<br>LSU-rRNA<br>LSU-rRNA<br>LSU-rRNA<br>LSU-rRNA<br>LSU-rRNA<br>LSU-rRNA<br>LSU-rRNA<br>LSU-rRNA<br>LSU-rRNA<br>LSU-rRNA<br>LSU-rRNA<br>LSU-rRNA<br>LSU-rRNA<br>LSU-rRNA<br>tRNA-Ala<br>LSU-rRNA | Chromosome 21 | 25 |
| Cluster14 | piR-hsa-1872<br>piR-hsa-1873<br>piR-hsa-12454<br>piR-hsa-182<br>piR-hsa-12525<br>piR-hsa-1191<br>piR-hsa-12719<br>piR-hsa-9010<br>piR-hsa-28478<br>piR-hsa-26747<br>piR-hsa-1077<br>piR-hsa-26754<br>piR-hsa-26946<br>piR-hsa-1336<br>piR-hsa-28212<br>piR-hsa-1043                                                                                                                                                       | LSU-rRNA<br>LSU-rRNA<br>LSU-rRNA<br>LSU-rRNA<br>LSU-rRNA<br>LSU-rRNA<br>LSU-rRNA<br>LSU-rRNA<br>LSU-rRNA<br>LSU-rRNA<br>LSU-rRNA<br>LSU-rRNA<br>LSU-rRNA<br>LSU-rRNA<br>LSU-rRNA<br>LSU-rRNA<br>LSU-rRNA<br>LSU-rRNA<br>LSU-rRNA<br>LSU-rRNA<br>LSU-rRNA<br>LSU-rRNA<br>LSU-rRNA<br>LSU-rRNA<br>LSU-rRNA             | Chromosome 21 | 24 |

|                                      |                                                                                                                                                                                                                                                                                                                            |                                                                                                                                                                                              |                           |    |
|--------------------------------------|----------------------------------------------------------------------------------------------------------------------------------------------------------------------------------------------------------------------------------------------------------------------------------------------------------------------------|----------------------------------------------------------------------------------------------------------------------------------------------------------------------------------------------|---------------------------|----|
|                                      | piR-hsa-3645<br>piR-hsa-2117<br>piR-hsa-25786<br>piR-hsa-20613<br>piR-hsa-11080<br>piR-hsa-1219<br>piR-hsa-28382<br>piR-hsa-25046                                                                                                                                                                                          | LSU-rRNA<br>LSU-rRNA<br>LSU-rRNA<br>LSU-rRNA<br>LSU-rRNA<br>LSU-rRNA<br>tRNA-Ala<br>LSU-rRNA                                                                                                 |                           |    |
| Cluster15                            | piR-hsa-28850<br>piR-hsa-28849<br>piR-hsa-28848<br>piR-hsa-3961<br>piR-hsa-952                                                                                                                                                                                                                                             | SNORD83B<br>SNORD83B<br>SNORD83B<br>SNORD83B<br>SNORD43                                                                                                                                      | Chromosome 22             | 5  |
| Cluster16<br>(mitochondrial cluster) | piR-hsa-28875<br>piR-hsa-1849<br>piR-hsa-27007<br>piR-hsa-12487<br>piR-hsa-12488<br>piR-hsa-27731<br>piR-hsa-23919<br>piR-hsa-2154<br>piR-hsa-2155<br>piR-hsa-1847<br>piR-hsa-28841<br>piR-hsa-21622<br>piR-hsa-9491<br>piR-hsa-26681<br>piR-hsa-26685<br>piR-hsa-26686<br>piR-hsa-15022<br>piR-hsa-15023<br>piR-hsa-20266 | NO MATCHES                                                                                                                                                                                   | Mitochondrial chromosome  | 19 |
| Cluster17                            | piR-hsa-1872<br>piR-hsa-1873<br>piR-hsa-12454<br>piR-hsa-182<br>piR-hsa-12525<br>piR-hsa-1191<br>piR-hsa-12719<br>piR-hsa-9010<br>piR-hsa-28478<br>piR-hsa-26747<br>piR-hsa-1077<br>piR-hsa-26754<br>piR-hsa-26946<br>piR-hsa-1336<br>piR-hsa-28212<br>piR-hsa-1043<br>piR-hsa-3645<br>piR-hsa-2117                        | LSU-rRNA<br>LSU-rRNA<br>LSU-rRNA<br>LSU-rRNA<br>LSU-rRNA<br>LSU-rRNA<br>LSU-rRNA<br>LSU-rRNA<br>LSU-rRNA<br>LSU-rRNA<br>LSU-rRNA<br>LSU-rRNA<br>LSU-rRNA<br>LSU-rRNA<br>LSU-rRNA<br>LSU-rRNA | Unplaced genomic scaffold | 24 |

|           |                                                                                                                                                                                                                                                                                                                                                                                                          |                                                                                                                                                                                                                                                                      |                              |    |
|-----------|----------------------------------------------------------------------------------------------------------------------------------------------------------------------------------------------------------------------------------------------------------------------------------------------------------------------------------------------------------------------------------------------------------|----------------------------------------------------------------------------------------------------------------------------------------------------------------------------------------------------------------------------------------------------------------------|------------------------------|----|
|           | piR-hsa-25786<br>piR-hsa-20613<br>piR-hsa-11080<br>piR-hsa-1219<br>piR-hsa-28382<br>piR-hsa-25046                                                                                                                                                                                                                                                                                                        | LSU-rRNA<br>LSU-rRNA<br>LSU-rRNA<br>LSU-rRNA<br>tRNA-Ala<br>LSU-rRNA                                                                                                                                                                                                 |                              |    |
| Cluster18 | piR-hsa-1872<br>piR-hsa-1873<br>piR-hsa-12454<br>piR-hsa-182<br>piR-hsa-12525<br>piR-hsa-1191<br>piR-hsa-12719<br>piR-hsa-9010<br>piR-hsa-28478<br>piR-hsa-26747<br>piR-hsa-1077<br>piR-hsa-26754<br>piR-hsa-26946<br>piR-hsa-1336<br>piR-hsa-28212<br>piR-hsa-1043<br>piR-hsa-3645<br>piR-hsa-2117<br>piR-hsa-25786<br>piR-hsa-20613<br>piR-hsa-11080<br>piR-hsa-1219<br>piR-hsa-28382<br>piR-hsa-25046 | LSU-rRNA<br>LSU-rRNA<br>LSU-rRNA<br>LSU-rRNA<br>LSU-rRNA<br>LSU-rRNA<br>LSU-rRNA<br>LSU-rRNA<br>LSU-rRNA<br>LSU-rRNA<br>LSU-rRNA<br>LSU-rRNA<br>LSU-rRNA<br>LSU-rRNA<br>LSU-rRNA<br>LSU-rRNA<br>LSU-rRNA<br>LSU-rRNA<br>LSU-rRNA<br>LSU-rRNA<br>tRNA-Ala<br>LSU-rRNA | Unlocalised genomic scaffold | 24 |
| Cluster19 | piR-hsa-28646<br>piR-hsa-1872<br>piR-hsa-1873<br>piR-hsa-12454<br>piR-hsa-182<br>piR-hsa-12525<br>piR-hsa-1191<br>piR-hsa-12719<br>piR-hsa-9010<br>piR-hsa-28478<br>piR-hsa-26747<br>piR-hsa-1077<br>piR-hsa-26754<br>piR-hsa-26946<br>piR-hsa-1336<br>piR-hsa-28212<br>piR-hsa-1043<br>piR-hsa-3645<br>piR-hsa-2117                                                                                     | LSU-rRNA<br>LSU-rRNA<br>LSU-rRNA<br>LSU-rRNA<br>LSU-rRNA<br>LSU-rRNA<br>LSU-rRNA<br>LSU-rRNA<br>LSU-rRNA<br>LSU-rRNA<br>LSU-rRNA<br>LSU-rRNA<br>LSU-rRNA<br>LSU-rRNA<br>LSU-rRNA<br>LSU-rRNA<br>LSU-rRNA                                                             | Chromosome 21_genomic patch  | 25 |

|           |                                                                                                                                                                                                                                                                                                                                                                                                          |                                                                                                                                                                                                                                                                      |                                |    |
|-----------|----------------------------------------------------------------------------------------------------------------------------------------------------------------------------------------------------------------------------------------------------------------------------------------------------------------------------------------------------------------------------------------------------------|----------------------------------------------------------------------------------------------------------------------------------------------------------------------------------------------------------------------------------------------------------------------|--------------------------------|----|
|           | piR-hsa-25786<br>piR-hsa-20613<br>piR-hsa-11080<br>piR-hsa-1219<br>piR-hsa-28382<br>piR-hsa-25046                                                                                                                                                                                                                                                                                                        | LSU-rRNA<br>LSU-rRNA<br>LSU-rRNA<br>LSU-rRNA<br>tRNA-Ala<br>LSU-rRNA                                                                                                                                                                                                 |                                |    |
| Cluster20 | piR-hsa-1873<br>piR-hsa-1872<br>piR-hsa-12454<br>piR-hsa-182<br>piR-hsa-12525<br>piR-hsa-1191<br>piR-hsa-12719<br>piR-hsa-9010<br>piR-hsa-28478<br>piR-hsa-26747<br>piR-hsa-1077<br>piR-hsa-26754<br>piR-hsa-26946<br>piR-hsa-1336<br>piR-hsa-28212<br>piR-hsa-1043<br>piR-hsa-3645<br>piR-hsa-2117<br>piR-hsa-25786<br>piR-hsa-20613<br>piR-hsa-11080<br>piR-hsa-1219<br>piR-hsa-28382<br>piR-hsa-25046 | LSU-rRNA<br>LSU-rRNA<br>LSU-rRNA<br>LSU-rRNA<br>LSU-rRNA<br>LSU-rRNA<br>LSU-rRNA<br>LSU-rRNA<br>LSU-rRNA<br>LSU-rRNA<br>LSU-rRNA<br>LSU-rRNA<br>LSU-rRNA<br>LSU-rRNA<br>LSU-rRNA<br>LSU-rRNA<br>LSU-rRNA<br>LSU-rRNA<br>LSU-rRNA<br>LSU-rRNA<br>tRNA-Ala<br>LSU-rRNA | Chromosome<br>21_genomic patch | 24 |
