# Supplementary material for: piRNAs in the human retina and retinal pigment epithelium reveal a potential role in intracellular trafficking and oxidative stress
Source: Royal Society of Chemistry journal article supplement (doi:10.1039/d3mo00122a), 2024-01-15
Supplement: d3mo00122a9.xlsx [file d3mo00122a9.xlsx]

## Sheet: piRNAs with diverse origin
Gene-derived piRNAs	Intron derived piRNAs	Intergenic derived piRNAs	5'UTR derived piRNAs	3'UTR derived piRNAs	Repeat-derived piRNAs	Pseudogene derived piRNAs
piR-hsa-27283	piR-hsa-27283	piR-hsa-32299	piR-hsa-26131	piR-hsa-11360	piR-hsa-23670	piR-hsa-23656
piR-hsa-25447	piR-hsa-25447	piR-hsa-28398	piR-hsa-25447	piR-hsa-27283	piR-hsa-32299	piR-hsa-24684
piR-hsa-32174	piR-hsa-32174	piR-hsa-28394	piR-hsa-3961	piR-hsa-993	piR-hsa-28398	piR-hsa-6144
piR-hsa-32175	piR-hsa-28845	piR-hsa-28876	piR-hsa-28848	piR-hsa-1742	piR-hsa-28394	piR-hsa-6145
piR-hsa-28845	piR-hsa-32201	piR-hsa-23655	piR-hsa-5370	piR-hsa-21131	piR-hsa-28876	piR-hsa-23330
piR-hsa-32201	piR-hsa-32154	piR-hsa-32221	piR-hsa-28849	piR-hsa-32261	piR-hsa-23656	piR-hsa-24683
piR-hsa-32154	piR-hsa-32167	piR-hsa-7201	piR-hsa-28850	piR-hsa-317	piR-hsa-23655
piR-hsa-32167	piR-hsa-24360	piR-hsa-32184	piR-hsa-18287	piR-hsa-32157	piR-hsa-27616
piR-hsa-24360	piR-hsa-32159	piR-hsa-28397	piR-hsa-963	piR-hsa-1944	piR-hsa-32221
piR-hsa-32162	piR-hsa-32168	piR-hsa-27731	piR-hsa-21622	piR-hsa-515	piR-hsa-32174
piR-hsa-32159	piR-hsa-32158	piR-hsa-28488		piR-hsa-32196	piR-hsa-7201
piR-hsa-32168	piR-hsa-28322	piR-hsa-23574		piR-hsa-28019	piR-hsa-24683
piR-hsa-32158	piR-hsa-32165	piR-hsa-7239		piR-hsa-11817	piR-hsa-32175
piR-hsa-28322	piR-hsa-32236	piR-hsa-12487		piR-hsa-27513	piR-hsa-32194
piR-hsa-32165	piR-hsa-993	piR-hsa-1254		piR-hsa-1359	piR-hsa-32201
piR-hsa-32236	piR-hsa-23884	piR-hsa-1849		piR-hsa-32588	piR-hsa-32184
piR-hsa-993	piR-hsa-32192	piR-hsa-28188			piR-hsa-32154
piR-hsa-23884	piR-hsa-1742	piR-hsa-11256			piR-hsa-32641
piR-hsa-32192	piR-hsa-820	piR-hsa-1580			piR-hsa-28397
piR-hsa-1742	piR-hsa-21131	piR-hsa-28189			piR-hsa-32167
piR-hsa-820	piR-hsa-28487	piR-hsa-27139			piR-hsa-32207
piR-hsa-21131	piR-hsa-32179	piR-hsa-27140			piR-hsa-5067
piR-hsa-28487	piR-hsa-2129	piR-hsa-20757			piR-hsa-32162
piR-hsa-32179	piR-hsa-12206	piR-hsa-12488			piR-hsa-28488
piR-hsa-2129	piR-hsa-3178	piR-hsa-28187			piR-hsa-23574
piR-hsa-12206	piR-hsa-23786	piR-hsa-32153			piR-hsa-7239
piR-hsa-3178	piR-hsa-32238	piR-hsa-28877			piR-hsa-32159
piR-hsa-23786	piR-hsa-18709	piR-hsa-23210			piR-hsa-32168
piR-hsa-32238	piR-hsa-25783	piR-hsa-7193			piR-hsa-5939
piR-hsa-18709	piR-hsa-3961	piR-hsa-28190			piR-hsa-12487
piR-hsa-25783	piR-hsa-28848	piR-hsa-25782			piR-hsa-1254
piR-hsa-3961	piR-hsa-32261	piR-hsa-32161			piR-hsa-32158
piR-hsa-28848	piR-hsa-317	piR-hsa-23637			piR-hsa-28322
piR-hsa-32261	piR-hsa-32157	piR-hsa-26681			piR-hsa-28188
piR-hsa-317	piR-hsa-1944	piR-hsa-23566			piR-hsa-11256
piR-hsa-32157	piR-hsa-515	piR-hsa-26685			piR-hsa-32165
piR-hsa-1944	piR-hsa-32160	piR-hsa-26686			piR-hsa-1580
piR-hsa-515	piR-hsa-5370	piR-hsa-28223			piR-hsa-28189
piR-hsa-32160	piR-hsa-426	piR-hsa-23679			piR-hsa-27139
piR-hsa-5370	piR-hsa-32196	piR-hsa-1100			piR-hsa-27140
piR-hsa-426	piR-hsa-25780	piR-hsa-27400			piR-hsa-20757
piR-hsa-32196	piR-hsa-2107	piR-hsa-26589			piR-hsa-32192
piR-hsa-25780	piR-hsa-24775	piR-hsa-28116			piR-hsa-12488
piR-hsa-2107	piR-hsa-23822	piR-hsa-26590			piR-hsa-28187
piR-hsa-24775	piR-hsa-23821	piR-hsa-28374			piR-hsa-32153
piR-hsa-23822	piR-hsa-28849	piR-hsa-23209			piR-hsa-21131
piR-hsa-23821	piR-hsa-32186	piR-hsa-23289			piR-hsa-28877
piR-hsa-28849	piR-hsa-32235	piR-hsa-32182			piR-hsa-32179
piR-hsa-32186	piR-hsa-32195	piR-hsa-31237			piR-hsa-32238
piR-hsa-32235	piR-hsa-28850	piR-hsa-15023			piR-hsa-18709
piR-hsa-32195	piR-hsa-952	piR-hsa-2154			piR-hsa-25783
piR-hsa-28850	piR-hsa-23638	piR-hsa-23619			piR-hsa-7193
piR-hsa-952	piR-hsa-28846	piR-hsa-25046			piR-hsa-28190
piR-hsa-23638	piR-hsa-17444	piR-hsa-1191			piR-hsa-25782
piR-hsa-28846	piR-hsa-28019	piR-hsa-31238			piR-hsa-32187
piR-hsa-17444	piR-hsa-28210	piR-hsa-2155			piR-hsa-32160
piR-hsa-28019	piR-hsa-18287	piR-hsa-28419			piR-hsa-426
piR-hsa-26593	piR-hsa-28875	piR-hsa-27007			piR-hsa-25780
piR-hsa-28210	piR-hsa-32177	piR-hsa-13893			piR-hsa-2107
piR-hsa-18287	piR-hsa-28209	piR-hsa-7238			piR-hsa-25781
piR-hsa-28875	piR-hsa-18286	piR-hsa-27398			piR-hsa-28402
piR-hsa-32177	piR-hsa-28319	piR-hsa-2106			piR-hsa-23637
piR-hsa-28209	piR-hsa-1823	piR-hsa-27399			piR-hsa-26681
piR-hsa-18286	piR-hsa-20266	piR-hsa-1593			piR-hsa-1823
piR-hsa-28319	piR-hsa-15022	piR-hsa-26508			piR-hsa-12525
piR-hsa-32591	piR-hsa-1359	piR-hsa-23919			piR-hsa-32186
piR-hsa-1823	piR-hsa-7549	piR-hsa-28646			piR-hsa-32235
piR-hsa-20266	piR-hsa-32538	piR-hsa-3405			piR-hsa-23566
piR-hsa-15022	piR-hsa-32198	piR-hsa-4947			piR-hsa-32195
piR-hsa-32252	piR-hsa-23231	piR-hsa-24684			piR-hsa-26685
piR-hsa-1359	piR-hsa-5937	piR-hsa-6144			piR-hsa-26686
piR-hsa-7549	piR-hsa-5938	piR-hsa-6145			piR-hsa-26947
piR-hsa-32538	piR-hsa-32256	piR-hsa-27619			piR-hsa-28223
piR-hsa-963	piR-hsa-28318	piR-hsa-12719			piR-hsa-23679
piR-hsa-32198	piR-hsa-32180	piR-hsa-23330			piR-hsa-23638
piR-hsa-23231	piR-hsa-32765	piR-hsa-2117			piR-hsa-1100
piR-hsa-5937	piR-hsa-28131	piR-hsa-27620			piR-hsa-12485
piR-hsa-5938	piR-hsa-1282	piR-hsa-27621			piR-hsa-27400
piR-hsa-32256	piR-hsa-2138	piR-hsa-23327			piR-hsa-26589
piR-hsa-28318	piR-hsa-27493	piR-hsa-20613			piR-hsa-28116
piR-hsa-32180	piR-hsa-32588	piR-hsa-27282			piR-hsa-26593
piR-hsa-32765	piR-hsa-1336	piR-hsa-1847			piR-hsa-5936
piR-hsa-28131	piR-hsa-1219	piR-hsa-21622			piR-hsa-23317
piR-hsa-1282	piR-hsa-32176	piR-hsa-28391			piR-hsa-26590
piR-hsa-2138	piR-hsa-32220	piR-hsa-28212			piR-hsa-28374
piR-hsa-27493	piR-hsa-32199	piR-hsa-27622			piR-hsa-11817
piR-hsa-32588	piR-hsa-26371	piR-hsa-28590			piR-hsa-27513
piR-hsa-1336	piR-hsa-32260	piR-hsa-28478			piR-hsa-32185
piR-hsa-28403	piR-hsa-32181	piR-hsa-12454			piR-hsa-32745
piR-hsa-1219	piR-hsa-32172	piR-hsa-28841			piR-hsa-28875
piR-hsa-32176	piR-hsa-1281	piR-hsa-1242			piR-hsa-32177
piR-hsa-32220	piR-hsa-32163	piR-hsa-1043			piR-hsa-23209
piR-hsa-32199	piR-hsa-3200	piR-hsa-1243			piR-hsa-32591
piR-hsa-26371	piR-hsa-26747	piR-hsa-9491			piR-hsa-23289
piR-hsa-32260	piR-hsa-23656	piR-hsa-27492			piR-hsa-32182
piR-hsa-32181	piR-hsa-24684	piR-hsa-11080			piR-hsa-31237
piR-hsa-32172	piR-hsa-6144	piR-hsa-3645			piR-hsa-24672
piR-hsa-1281	piR-hsa-6145	piR-hsa-1077			piR-hsa-32213
piR-hsa-32163	piR-hsa-23330				piR-hsa-32280
piR-hsa-3200	piR-hsa-24683				piR-hsa-23619
piR-hsa-26747					piR-hsa-20266
					piR-hsa-25046
					piR-hsa-32252
					piR-hsa-28819
					piR-hsa-1191
					piR-hsa-31238
					piR-hsa-6839
					piR-hsa-28419
					piR-hsa-28405
					piR-hsa-23231
					piR-hsa-5937
					piR-hsa-5938
					piR-hsa-13893
					piR-hsa-7238
					piR-hsa-6840
					piR-hsa-27398
					piR-hsa-2106
					piR-hsa-27399
					piR-hsa-1593
					piR-hsa-1207
					piR-hsa-28131
					piR-hsa-12790
					piR-hsa-25779
					piR-hsa-26508
					piR-hsa-27124
					piR-hsa-1282
					piR-hsa-12423
					piR-hsa-28646
					piR-hsa-3405
					piR-hsa-4947
					piR-hsa-27493
					piR-hsa-24684
					piR-hsa-6144
					piR-hsa-6143
					piR-hsa-6145
					piR-hsa-6147
					piR-hsa-27619
					piR-hsa-28382
					piR-hsa-1872
					piR-hsa-12719
					piR-hsa-23330
					piR-hsa-9010
					piR-hsa-2117
					piR-hsa-1336
					piR-hsa-27620
					piR-hsa-27621
					piR-hsa-23327
					piR-hsa-20613
					piR-hsa-27282
					piR-hsa-32170
					piR-hsa-21622
					piR-hsa-28391
					piR-hsa-28403
					piR-hsa-28212
					piR-hsa-27622
					piR-hsa-1219
					piR-hsa-25786
					piR-hsa-28527
					piR-hsa-28590
					piR-hsa-32181
					piR-hsa-28478
					piR-hsa-12454
					piR-hsa-1873
					piR-hsa-3616
					piR-hsa-26754
					piR-hsa-1008
					piR-hsa-1281
					piR-hsa-28841
					piR-hsa-1242
					piR-hsa-1243
					piR-hsa-9491
					piR-hsa-28392
					piR-hsa-28401
					piR-hsa-27492
					piR-hsa-11080
					piR-hsa-3645
					piR-hsa-1077
					piR-hsa-26747
					piR-hsa-11341
					piR-hsa-26946
