# Supplementary material for: piRNAs in the human retina and retinal pigment epithelium reveal a potential role in intracellular trafficking and oxidative stress
Source: Royal Society of Chemistry journal article supplement (doi:10.1039/d3mo00122a), 2024-01-15
Supplement: d3mo00122a10.xlsx [file d3mo00122a10.xlsx]

## Sheet: 1st motif
Trancription factors	Functions associated to transcription factors correspoding to 1st motif
ZNF143	Function	FDR	Genes in network	Genes in genome
	transcription by RNA polymerase III	1.33606e-18	10	38
	snRNA transcription	2.50879e-13	9	74
	ncRNA transcription	4.08958e-12	9	104
	general transcription initiation factor activity	1.68675e-08	6	42
	nuclear DNA-directed RNA polymerase complex	3.82925e-08	7	105
	DNA-directed RNA polymerase complex	3.82925e-08	7	106
	RNA polymerase complex	4.00559e-08	7	109
	type I interferon production	5.13439e-08	7	115
	transcription regulator complex	1.91218e-07	8	244
	regulation of type I interferon production	2.1041e-06	6	106
	transferase complex, transferring phosphorus-containing groups	7.36364e-06	7	244
	5'-3' RNA polymerase activity	3.65436e-05	4	29
	RNA polymerase activity	4.46268e-05	4	31
	positive regulation of type I interferon production	5.38169e-05	4	33
	regulation of interferon-beta production	9.0295e-05	4	38
	interferon-beta production	0.000115897	4	41
	nucleotidyltransferase activity	0.00492603	4	105
	general transcription initiation factor binding	0.00867025	3	37
	regulation of transcription by RNA polymerase III	0.0868977	2	13
NFIB	Function	FDR	Genes in network	Genes in genome
	nuclear DNA-directed RNA polymerase complex	1.95655e-16	11	105
	DNA-directed RNA polymerase complex	1.95655e-16	11	106
	RNA polymerase complex	1.95655e-16	11	109
	regulation of type I interferon production	2.17404e-14	10	106
	type I interferon production	4.05133e-14	10	115
	transferase complex, transferring phosphorus-containing groups	8.70495e-13	11	244
	5'-3' RNA polymerase activity	8.80243e-10	6	29
	RNA polymerase activity	1.19227e-09	6	31
	positive regulation of type I interferon production	1.59214e-09	6	33
	regulation of interferon-beta production	3.56001e-09	6	38
	interferon-beta production	5.26083e-09	6	41
	transcription by RNA polymerase III	6.63101e-07	5	38
	nucleotidyltransferase activity	1.52793e-06	6	105
	positive regulation of response to biotic stimulus	0.00410541	5	220
	regulation of innate immune response	0.00787727	5	255
	positive regulation of defense response	0.0152179	5	296
	nucleolus	0.0267308	4	161
ZNF76	Function	FDR	Genes in network	Genes in genome
	transcription regulator complex	0.0953217	5	244
NR3C2	Function	FDR	Genes in network	Genes in genome
	cellular response to steroid hormone stimulus	5.44325e-05	6	124
	response to steroid hormone	0.000121505	6	159
	rhythmic process	0.000187706	6	183
	steroid hormone mediated signaling pathway	0.000316082	5	102
	hormone-mediated signaling pathway	0.000548107	5	119
	ligand-activated transcription factor activity	0.000643043	4	49
	circadian rhythm	0.000979206	5	143
	rhythmic behavior	0.00508425	3	24
	intracellular receptor signaling pathway	0.00508425	5	210
	DNA-templated transcription, initiation	0.00525353	5	216
	RNA polymerase II-specific DNA-binding transcription factor binding	0.00649428	5	230
	hormone receptor binding	0.0271948	4	148
SOX3
NR3C1	Function	FDR	Genes in network	Genes in genome
	nuclear hormone receptor binding	2.35713e-05	6	108
	steroid hormone receptor binding	5.04591e-05	5	66
	hormone receptor binding	5.04591e-05	6	148
	nuclear receptor binding	5.04591e-05	5	71
	RNA polymerase II-specific DNA-binding transcription factor binding	0.000437811	6	230
	cellular response to steroid hormone stimulus	0.000561167	5	124
	response to steroid hormone	0.00165797	5	159
	cellular response to corticosteroid stimulus	0.00246306	3	19
	rhythmic process	0.00258382	5	183
	response to glucocorticoid	0.00312513	3	22
	response to epidermal growth factor	0.00601884	3	28
	response to corticosteroid	0.0100366	3	34
	circadian rhythm	0.0219229	4	143
	transcription coactivator activity	0.026216	3	49
SOX2	Function	FDR	Genes in network	Genes in genome
	stem cell population maintenance	0.0164561	4	70
	maintenance of cell number	0.0216247	4	89
	cell fate commitment	0.0444103	4	118
	regulatory RNA binding	0.0495093	3	40
	gliogenesis	0.0509631	4	139
YY1	Function	FDR	Genes in network	Genes in genome
	DNA helicase complex	6.42083e-14	7	15
	INO80-type complex	2.38333e-12	7	25
	SWI/SNF superfamily-type complex	5.76939e-09	7	74
	ATPase complex	5.77149e-09	7	77
	nuclear chromatin	7.67463e-09	8	152
	histone methyltransferase complex	1.42165e-05	5	60
	methyltransferase complex	0.000186066	5	107
	G0 to G1 transition	0.000186066	4	40
	regulation of G0 to G1 transition	0.000186066	4	40
	chromatin binding	0.000709618	5	144
	DNA-dependent ATPase activity	0.0009766	4	63
	transcription corepressor binding	0.00138372	3	18
	H4/H2A histone acetyltransferase complex	0.00178199	3	20
	RNA polymerase II transcription cofactor binding	0.00223224	3	22
	helicase activity	0.00275562	4	88
	response to UV	0.00365994	4	96
	cellular response to light stimulus	0.00511567	4	106
	chromatin remodeling	0.00701215	4	118
	PcG protein complex	0.00701215	3	35
	histone-lysine N-methyltransferase activity	0.00780322	3	37
	protein modification by small protein removal	0.010678	5	291
	protein-lysine N-methyltransferase activity	0.0118106	3	45
	H4 histone acetyltransferase complex	0.0118106	3	45
	transcription cofactor binding	0.0118106	3	45
	cellular response to radiation	0.0164664	4	157
	histone methyltransferase activity	0.0178997	3	53
	lysine N-methyltransferase activity	0.0245839	3	60
	catalytic activity, acting on DNA	0.0245839	4	179
	ATPase activity	0.03121	4	192
	small nucleolar ribonucleoprotein complex assembly	0.0318124	2	10
	histone acetyltransferase complex	0.0409491	3	74
SOX9	Function	FDR	Genes in network	Genes in genome
	male gonad development	1.3348e-05	4	13
	DNA-templated transcription, initiation	1.73616e-05	7	216
	development of primary male sexual characteristics	0.0015148	4	51
	male sex differentiation	0.00166402	4	56
	cartilage development	0.00348529	4	71
	gonad development	0.00382183	4	76
	development of primary sexual characteristics	0.00444744	4	82
	sex differentiation	0.00896561	4	101
	connective tissue development	0.013164	4	117
	regulation of cartilage development	0.013164	3	35
	reproductive system development	0.0257755	4	146
	reproductive structure development	0.0257755	4	146
SOX6
SOX18	Function	FDR	Genes in network	Genes in genome
	regulation of blood vessel endothelial cell migration	0.0120854	4	77
	endothelial cell migration	0.0120854	5	173
	negative regulation of endothelial cell migration	0.018136	3	35
	epithelium migration	0.018136	5	261
	epithelial cell migration	0.018136	5	255
	blood vessel endothelial cell migration	0.018136	4	95
	cell fate commitment	0.018136	4	118
	tissue migration	0.018136	5	266
	embryonic heart tube morphogenesis	0.0246858	3	43
	determination of heart left/right asymmetry	0.0246858	3	43
	embryonic heart tube development	0.0265223	3	48
	heart morphogenesis	0.0265223	4	148
	regulation of endothelial cell migration	0.0265223	4	147
	epithelial tube morphogenesis	0.0295627	4	160
	negative regulation of epithelial cell migration	0.0295627	3	52
	determination of left/right symmetry	0.0381814	3	58
	embryonic organ development	0.0500691	4	189
	positive regulation of striated muscle tissue development	0.0502301	2	10
	cell fate determination	0.0502301	2	10
SOX8	Function	FDR	Genes in network	Genes in genome
	sex differentiation	1.56829e-05	6	101
	development of primary male sexual characteristics	1.84563e-05	5	51
	male sex differentiation	1.99402e-05	5	56
	reproductive system development	2.91308e-05	6	146
	reproductive structure development	2.91308e-05	6	146
	gonad development	4.75717e-05	5	76
	development of primary sexual characteristics	5.99767e-05	5	82
	glial cell differentiation	0.000150396	5	101
	metanephric nephron tubule development	0.000272809	3	10
	metanephric tubule development	0.00033737	3	11
	gliogenesis	0.000425133	5	139
	metanephric epithelium development	0.000425133	3	13
	metanephric nephron epithelium development	0.000425133	3	13
	male gonad development	0.000425133	3	13
	autonomic nervous system development	0.00491973	3	29
	metanephros development	0.0089693	3	36
	embryonic morphogenesis	0.0143228	5	296
	myoblast differentiation	0.0168346	3	46
	nephron tubule development	0.0193171	3	49
	renal tubule development	0.0195092	3	50
	neural crest cell differentiation	0.0276048	3	57
	ear development	0.0299283	3	60
	chordate embryonic development	0.0299283	4	179
	embryo development ending in birth or egg hatching	0.0306065	4	182
	embryonic organ development	0.0327375	4	189
	nephron epithelium development	0.0327375	3	64
	renal vesicle morphogenesis	0.0340847	2	10
	cranial nerve morphogenesis	0.0340847	2	10
	cochlea development	0.0353244	2	11
	kidney epithelium development	0.0353244	3	69
	stem cell population maintenance	0.0353244	3	70
	camera-type eye photoreceptor cell differentiation	0.0353244	2	11
	regulation of neuron differentiation	0.0353244	3	71
	skeletal system morphogenesis	0.0408436	3	77
	renal vesicle development	0.0408436	2	12
	metanephric nephron morphogenesis	0.0458627	2	13
	nephron development	0.0500856	3	84
	regulation of branching involved in ureteric bud morphogenesis	0.0506577	2	14
SOX5	Function	FDR	Genes in network	Genes in genome
	response to transforming growth factor beta	0.000601583	6	195
	glial cell differentiation	0.000601583	5	101
	RNA polymerase II transcription regulator complex	0.000736775	5	114
	gliogenesis	0.00148797	5	139
	SMAD binding	0.0158869	3	31
	transcription regulator complex	0.0158869	5	244
	response to BMP	0.0204375	4	128
	cellular response to BMP stimulus	0.0204375	4	122
	oligodendrocyte differentiation	0.0204375	3	39
SOX2	Function	FDR	Genes in network	Genes in genome
	stem cell population maintenance	0.0164561	4	70
	maintenance of cell number	0.0216247	4	89
	cell fate commitment	0.0444103	4	118
	regulatory RNA binding	0.0495093	3	40
	gliogenesis	0.0509631	4	139
REST	Function	FDR	Genes in network	Genes in genome
	macromolecule deacylation	0.0164638	4	92
	protein deacetylation	0.0164638	4	81
	protein deacylation	0.0164638	4	92
	histone deacetylation	0.03291	3	35
	nuclear chromatin	0.0724926	4	152
	transcription corepressor binding	0.403527	2	18
	skeletal muscle cell differentiation	0.403527	2	17
	cardioblast differentiation	0.403527	2	16
ZNF675
SOX17	Function	FDR	Genes in network	Genes in genome
	RNA polymerase II transcription regulator complex	0.00221032	5	114
	endoderm development	0.00227219	4	51
	embryonic morphogenesis	0.00322153	6	296
	formation of primary germ layer	0.00573275	4	76
	transcription regulator complex	0.0167981	5	244
	gastrulation	0.0167981	4	110
	embryonic organ morphogenesis	0.0270989	4	129

## Sheet: 2nd motif
Trancription factors	Functions associated to transcription factors correspoding to 2nd motif
NKX3-1
ZBED2	Function	FDR	Genes in network	Genes in genome
	thyroid hormone metabolic process	9.9503e-08	5	17
	phenol-containing compound metabolic process	6.9506e-05	5	66
	cellular modified amino acid metabolic process	0.0034857	5	156
	hormone metabolic process	0.0034857	5	165
PPARA::RXRA	Function	FDR	Genes in network	Genes in genome
	fatty acid metabolic process	0.000300727	7	295
	monocarboxylic acid binding	0.00822803	4	70
	cellular lipid catabolic process	0.00945533	5	207
	lipid oxidation	0.00945533	4	91
	fatty acid oxidation	0.00945533	4	84
	transcription regulator complex	0.0136174	5	244
	lipid catabolic process	0.0136174	5	242
	monocarboxylic acid transport	0.0183986	4	121
	carboxylic acid binding	0.0401451	4	153
	organic acid binding	0.0401451	4	156
HOXD13	Function	FDR	Genes in network	Genes in genome
	cyclin-dependent protein kinase activity	0.0359144	3	23
	SMAD binding	0.0453282	3	31
NR1D1	Function	FDR	Genes in network	Genes in genome
	rhythmic process	6.05107e-25	16	183
	circadian rhythm	1.9779e-24	15	143
	ligand-activated transcription factor activity	1.00017e-05	5	49
	regulation of intracellular steroid hormone receptor signaling pathway	2.73887e-05	5	63
	negative regulation of intracellular steroid hormone receptor signaling pathway	7.56598e-05	4	28
	intracellular steroid hormone receptor signaling pathway	0.000147283	5	95
	steroid hormone mediated signaling pathway	0.000180618	5	102
	DNA-templated transcription, initiation	0.000188648	6	216
	hormone-mediated signaling pathway	0.000274054	5	119
	transcription cofactor binding	0.000274054	4	45
	cellular response to steroid hormone stimulus	0.000281142	5	124
	corticosteroid receptor signaling pathway	0.000281142	3	11
	chromatin binding	0.000443512	5	144
	regulation of circadian rhythm	0.000443512	4	55
	cold-induced thermogenesis	0.000443512	5	144
	regulation of cold-induced thermogenesis	0.000443512	5	143
	adaptive thermogenesis	0.000478326	5	148
	temperature homeostasis	0.000532785	5	153
	response to steroid hormone	0.000610831	5	159
	protein deacetylation	0.0014817	4	81
	cellular carbohydrate metabolic process	0.00163212	5	198
	protein acylation	0.00163684	5	200
	rhythmic behavior	0.00178334	3	24
	macromolecule deacylation	0.00189967	4	92
	protein deacylation	0.00189967	4	92
	intracellular receptor signaling pathway	0.00189967	5	210
	regulation of cellular carbohydrate metabolic process	0.00207992	4	95
	RNA polymerase II-specific DNA-binding transcription factor binding	0.00255133	5	230
	fat cell differentiation	0.00257244	4	102
	transcription regulator complex	0.00317739	5	244
	hair cycle	0.00388513	3	34
	histone deacetylation	0.00411375	3	35
	negative regulation of stress-activated MAPK cascade	0.00434875	3	36
	negative regulation of stress-activated protein kinase signaling cascade	0.00675861	3	42
	molting cycle	0.00809871	3	45
	protein acetylation	0.0100684	4	152
	regulation of carbohydrate metabolic process	0.0103133	4	154
	RNA polymerase II cis-regulatory region sequence-specific DNA binding	0.0196508	3	62
	response to light stimulus	0.0460103	4	229
	type B pancreatic cell differentiation	0.0481248	2	14
MYBL2	Function	FDR	Genes in network	Genes in genome
	cell cycle arrest	3.62515e-07	7	113
	DNA damage response, signal transduction by p53 class mediator	2.69932e-06	6	92
	negative regulation of cell cycle G1/S phase transition	2.69932e-06	6	93
	regulation of cell cycle arrest	2.69932e-06	6	95
	mitotic G1 DNA damage checkpoint	5.4647e-06	5	57
	regulation of G1/S transition of mitotic cell cycle	5.4647e-06	6	116
	signal transduction involved in mitotic DNA integrity checkpoint	5.4647e-06	5	58
	signal transduction involved in mitotic G1 DNA damage checkpoint	5.4647e-06	5	56
	signal transduction in response to DNA damage	5.4647e-06	6	117
	positive regulation of cell cycle arrest	5.4647e-06	5	56
	signal transduction by p53 class mediator	5.4647e-06	7	242
	signal transduction involved in mitotic DNA damage checkpoint	5.4647e-06	5	58
	intracellular signal transduction involved in G1 DNA damage checkpoint	5.4647e-06	5	57
	signal transduction involved in mitotic cell cycle checkpoint	5.4647e-06	5	58
	mitotic G1/S transition checkpoint	6.30803e-06	5	62
	G1 DNA damage checkpoint	6.30803e-06	5	62
	regulation of cell cycle G1/S phase transition	6.37575e-06	6	139
	negative regulation of G1/S transition of mitotic cell cycle	6.5977e-06	5	64
	signal transduction involved in DNA integrity checkpoint	9.17438e-06	5	71
	G1/S transition of mitotic cell cycle	9.17438e-06	6	152
	signal transduction involved in cell cycle checkpoint	9.17438e-06	5	71
	signal transduction involved in DNA damage checkpoint	9.17438e-06	5	69
	mitotic DNA damage checkpoint	3.45101e-05	5	93
	negative regulation of mitotic cell cycle phase transition	4.42685e-05	6	205
	mitotic DNA integrity checkpoint	4.42685e-05	5	99
	negative regulation of cell cycle phase transition	6.64763e-05	6	221
	DNA damage checkpoint	9.73026e-05	5	118
	cell cycle G1/S phase transition	9.80918e-05	6	239
	negative regulation of mitotic cell cycle	0.000166497	6	263
	mitotic cell cycle checkpoint	0.000177964	5	136
	DNA integrity checkpoint	0.000253618	5	147
	positive regulation of cell cycle	0.000302018	6	296
	cell cycle checkpoint	0.00108541	5	201
	cyclin-dependent protein kinase holoenzyme complex	0.00108541	3	23
	positive regulation of cell cycle process	0.00277832	5	245
	chromatin binding	0.00813717	4	144
	regulation of viral transcription	0.0222027	3	64
	viral transcription	0.027093	3	69
	nuclear cyclin-dependent protein kinase holoenzyme complex	0.0298898	2	11
	serine/threonine protein kinase complex	0.0415698	3	81
NKX2-1	Function	FDR	Genes in network	Genes in genome
	regulation of epithelial to mesenchymal transition	0.022931	4	76
	mesenchyme development	0.0262676	5	216
	epithelial to mesenchymal transition	0.0312296	4	108
	embryonic organ morphogenesis	0.0474232	4	129
	embryonic morphogenesis	0.0486974	5	296
NKX2-4	Function	FDR	Genes in network	Genes in genome
	regionalization	2.32692e-16	12	157
	pattern specification process	8.68591e-15	12	223
	embryonic skeletal system development	1.14162e-13	8	38
	skeletal system morphogenesis	1.82791e-13	9	77
	skeletal system development	1.2289e-11	10	201
	embryonic organ morphogenesis	1.68632e-09	8	129
	chordate embryonic development	1.89696e-08	8	179
	embryo development ending in birth or egg hatching	1.89696e-08	8	182
	embryonic morphogenesis	1.89696e-08	9	296
	embryonic organ development	2.22652e-08	8	189
NKX2-5	Function	FDR	Genes in network	Genes in genome
	heart morphogenesis	5.38853e-19	13	148
	heart development	2.17917e-18	14	251
	cardiac chamber morphogenesis	4.67307e-18	11	79
	cardiocyte differentiation	6.24858e-18	11	83
	cardiac chamber development	1.87912e-17	11	93
	cardiac septum development	1.12719e-14	9	60
	striated muscle tissue development	1.39982e-14	11	171
	muscle tissue development	2.18053e-14	11	180
	cardiac ventricle morphogenesis	5.80786e-13	8	52
	cardiac muscle tissue development	1.0239e-12	9	102
	determination of left/right symmetry	1.2061e-12	8	58
	embryonic morphogenesis	3.70411e-12	11	296
	cardiac ventricle development	5.62134e-12	8	71
	cardioblast differentiation	7.48295e-12	6	16
	mesenchyme development	8.48396e-12	10	216
	determination of bilateral symmetry	1.5202e-11	8	82
	specification of symmetry	1.58247e-11	8	83
	epithelial tube morphogenesis	3.62251e-11	9	160
	regulation of cardiocyte differentiation	5.11724e-11	6	22
	embryonic organ development	1.48894e-10	9	189
	positive regulation of cardiocyte differentiation	9.88148e-10	5	13
	determination of heart left/right asymmetry	3.40694e-09	6	43
	embryonic heart tube morphogenesis	3.40694e-09	6	43
	regulation of muscle cell differentiation	3.75178e-09	7	93
	embryonic heart tube development	6.28859e-09	6	48
	stem cell differentiation	6.606e-09	8	183
	regulation of striated muscle cell differentiation	8.22406e-09	6	51
	cardiac muscle cell differentiation	8.22406e-09	6	51
	muscle cell differentiation	1.72141e-08	8	209
	muscle organ development	2.47636e-08	7	125
	pattern specification process	2.70603e-08	8	223
	embryonic organ morphogenesis	2.90269e-08	7	129
	regulation of heart growth	3.9072e-08	5	27
	regulation of organ growth	1.30092e-07	5	34
	ventricular cardiac muscle tissue development	1.43245e-07	5	35
	cardiac muscle tissue morphogenesis	1.43245e-07	5	35
	heart growth	1.61743e-07	5	36
	mesenchymal cell differentiation	3.09786e-07	7	185
	negative regulation of muscle cell apoptotic process	3.25562e-07	4	13
	striated muscle cell apoptotic process	3.25562e-07	4	13
	regulation of striated muscle cell apoptotic process	3.25562e-07	4	13
	cardiac septum morphogenesis	3.62102e-07	5	43
	muscle tissue morphogenesis	5.02625e-07	5	46
	muscle organ morphogenesis	5.49305e-07	5	47
	cardiac atrium morphogenesis	1.53319e-06	4	19
	regulation of cardiac muscle cell proliferation	1.53319e-06	4	19
	organ growth	1.53319e-06	5	58
	cardiac muscle cell proliferation	1.837e-06	4	20
	positive regulation of organ growth	1.837e-06	4	20
	striated muscle cell differentiation	3.03505e-06	6	147
	regulation of muscle system process	3.35941e-06	6	150
	regulation of cardiac muscle tissue growth	3.78597e-06	4	24
	cardiac atrium development	4.33718e-06	4	25
	positive regulation of striated muscle cell differentiation	4.33718e-06	4	25
	muscle cell apoptotic process	8.57016e-06	4	30
	cardiac muscle tissue growth	8.57016e-06	4	30
	outflow tract morphogenesis	8.57016e-06	4	30
	chordate embryonic development	8.57016e-06	6	179
	regulation of muscle cell apoptotic process	8.57016e-06	4	30
	embryo development ending in birth or egg hatching	9.08352e-06	6	182
	SMAD binding	9.35722e-06	4	31
	striated muscle cell proliferation	9.35722e-06	4	31
	positive regulation of transmembrane receptor protein serine/threonine kinase signaling pathway	9.52929e-06	5	88
	cardiac muscle cell development	1.03526e-05	4	32
	positive regulation of muscle cell differentiation	1.31278e-05	4	34
	in utero embryonic development	1.61543e-05	4	36
	cardiac muscle hypertrophy	1.61543e-05	4	36
	mesenchyme morphogenesis	2.2179e-05	4	39
	cardiac cell development	2.68746e-05	4	41
	striated muscle hypertrophy	2.92589e-05	4	42
	muscle hypertrophy	3.17835e-05	4	43
	positive regulation of stem cell differentiation	3.41012e-05	3	10
	myoblast differentiation	4.07913e-05	4	46
	cellular response to BMP stimulus	4.1388e-05	5	122
	transcription regulator complex	4.1388e-05	6	244
	cardiac muscle cell apoptotic process	4.43908e-05	3	11
	developmental growth	4.76266e-05	6	251
	response to BMP	5.05862e-05	5	128
	cell proliferation involved in heart morphogenesis	5.69011e-05	3	12
	muscle adaptation	6.64702e-05	4	53
	regulation of cardiac muscle cell differentiation	7.20955e-05	3	13
	transmembrane receptor protein serine/threonine kinase signaling pathway	8.87179e-05	6	282
	regulation of pathway-restricted SMAD protein phosphorylation	9.14053e-05	4	58
	positive regulation of transcription by RNA polymerase II	9.14053e-05	5	146
	pathway-restricted SMAD protein phosphorylation	0.000103677	4	60
	regulation of developmental growth	0.00012279	5	156
	positive regulation of cardiac muscle tissue growth	0.000157349	3	17
	positive regulation of heart growth	0.000157349	3	17
	embryonic placenta development	0.000186569	3	18
	regulation of neuron differentiation	0.000193627	4	71
	positive regulation of developmental growth	0.000238892	4	75
	regulation of epithelial to mesenchymal transition	0.00024925	4	76
	trabecula morphogenesis	0.000382608	3	23
	striated muscle cell development	0.000382608	4	85
	regulation of transmembrane receptor protein serine/threonine kinase signaling pathway	0.000388462	5	201
	muscle cell development	0.000584978	4	95
	ventricular septum development	0.000609837	3	27
	regulation of cardiac muscle hypertrophy	0.00075302	3	29
	regulation of muscle contraction	0.000845883	4	105
	muscle cell proliferation	0.000897588	4	107
	regulation of muscle hypertrophy	0.000897588	3	31
	epithelial to mesenchymal transition	0.000918517	4	108
	endocardial cushion development	0.00106687	3	33
	placenta development	0.00126577	3	35
	cell fate commitment	0.00126886	4	118
	regulation of muscle adaptation	0.00201439	3	41
	positive regulation of growth	0.00259082	4	142
	myofibril assembly	0.00262458	3	45
	heart valve morphogenesis	0.00278003	3	46
	reproductive system development	0.00278654	4	146
	reproductive structure development	0.00278654	4	146
	renal system development	0.00315329	4	151
	heart valve development	0.003248	3	49
	urogenital system development	0.00370229	4	158
	epithelial tube formation	0.00452594	3	55
	tube formation	0.00499743	3	57
	endothelial cell migration	0.00514859	4	173
	muscle hypertrophy in response to stress	0.00769175	2	10
	regulation of skeletal muscle cell differentiation	0.00769175	2	10
	nodal signaling pathway	0.00769175	2	10
	heart valve formation	0.00769175	2	10
	blastocyst development	0.00769175	2	10
	cardiac muscle adaptation	0.00769175	2	10
	cell fate determination	0.00769175	2	10
	response to transforming growth factor beta	0.00769175	4	195
	stem cell population maintenance	0.00853091	3	70
	atrial septum development	0.00917877	2	11
	response to decreased oxygen levels	0.00965553	4	208
	negative regulation of muscle hypertrophy	0.0108368	2	12
	muscle contraction	0.011007	4	216
	response to oxygen levels	0.0116915	4	220
	cellular component assembly involved in morphogenesis	0.0116915	3	79
	regulation of actomyosin structure organization	0.0120474	3	80
	negative regulation of cell motility	0.0120834	4	223
	heart formation	0.0139492	2	14
	regulation of amyloid-beta clearance	0.0139492	2	14
	embryonic camera-type eye development	0.0139492	2	14
	embryonic eye morphogenesis	0.0139492	2	14
	negative regulation of cellular component movement	0.0140336	4	234
	atrioventricular valve morphogenesis	0.0156318	2	15
	maintenance of cell number	0.0156318	3	89
	coronary vasculature development	0.0156318	2	15
	positive regulation of muscle contraction	0.0176055	2	16
	ventricular cardiac muscle tissue morphogenesis	0.0176055	2	16
	epithelial cell migration	0.0187379	4	255
	negative regulation of locomotion	0.0188918	4	256
	skeletal muscle cell differentiation	0.0195331	2	17
	epithelium migration	0.0200752	4	261
	roof of mouth development	0.0210995	2	18
	regulation of smooth muscle contraction	0.0210995	2	18
	tissue migration	0.0210995	4	266
	negative regulation of steroid biosynthetic process	0.0210995	2	18
	regulation of stem cell differentiation	0.0210995	3	101
	aorta development	0.0232625	2	19
	positive regulation of muscle hypertrophy	0.0232625	2	19
	regulation of histone modification	0.0250375	3	108
	negative regulation of striated muscle cell differentiation	0.0251808	2	20
	striated muscle adaptation	0.0251808	2	20
	negative regulation of steroid metabolic process	0.0251808	2	20
	RNA polymerase II transcription regulator complex	0.0286351	3	114
	positive regulation of neuron projection development	0.030009	2	22
	atrioventricular valve development	0.030009	2	22
	transmembrane receptor protein serine/threonine kinase binding	0.0322487	2	23
	positive regulation of DNA-templated transcription, initiation	0.0322487	2	23
	receptor serine/threonine kinase binding	0.0322487	2	23
	animal organ formation	0.034946	2	24
	endocardial cushion morphogenesis	0.0377331	2	25
	dendrite development	0.040132	3	130
	amyloid-beta clearance	0.0403678	2	26
	positive regulation of histone methylation	0.0430597	2	27
	embryonic limb morphogenesis	0.0430597	2	27
	negative regulation of cell migration	0.0437856	3	135
	regulation of transcription initiation from RNA polymerase II promoter	0.0455432	2	28
	activin receptor signaling pathway	0.0455432	2	28
	gland development	0.0478703	3	140
	actomyosin structure organization	0.0506431	3	143
NR2F6	Function	FDR	Genes in network	Genes in genome
	ligand-activated transcription factor activity	9.45588e-15	9	49
	DNA-templated transcription, initiation	4.9999e-09	9	216
	intracellular receptor signaling pathway	1.72891e-07	8	210
	hormone-mediated signaling pathway	0.000685134	5	119
	hormone receptor binding	0.00162631	5	148
	RNA polymerase II-specific DNA-binding transcription factor binding	0.0106573	5	230
	steroid hormone mediated signaling pathway	0.0106573	4	102
	nuclear hormone receptor binding	0.0117111	4	108
	cellular response to steroid hormone stimulus	0.0180222	4	124
	response to steroid hormone	0.0432654	4	159

## Sheet: 3rd motif
Trancription factors	Functions associated to transcription factors correspoding to 3rd motif
BHLHE40	Function	FDR	Genes in network	Genes in genome
	transcription regulator complex	3.00748e-08	9	244
	RNA polymerase II-specific DNA-binding transcription factor binding	3.57977e-07	8	230
	RNA polymerase II cis-regulatory region sequence-specific DNA binding	3.57977e-07	6	62
	rhythmic process	2.7273e-06	7	183
	circadian rhythm	2.57125e-05	6	143
	regulation of myeloid cell differentiation	5.24216e-05	6	166
	regulation of erythrocyte differentiation	0.000107634	4	33
	erythrocyte differentiation	0.000443218	4	48
	myeloid cell differentiation	0.000548607	6	264
	regulation of hemopoiesis	0.000742755	6	283
	erythrocyte homeostasis	0.00167625	4	72
	myeloid cell homeostasis	0.00285803	4	84
	negative regulation of intracellular steroid hormone receptor signaling pathway	0.00509287	3	28
	regulation of transcription from RNA polymerase II promoter in response to stress	0.00558283	4	104
	regulation of DNA-templated transcription in response to stress	0.00558283	4	105
	hair cycle	0.0063389	3	34
	DNA-binding transcription repressor activity	0.0063389	5	254
	RNA polymerase II transcription regulator complex	0.0063389	4	114
	homeostasis of number of cells	0.0063389	4	114
	cellular response to steroid hormone stimulus	0.00811	4	124
	molting cycle	0.0134979	3	45
	response to steroid hormone	0.0196661	4	159
	columnar/cuboidal epithelial cell differentiation	0.0202344	3	53
	heat shock protein binding	0.0228986	3	56
	regulation of intracellular steroid hormone receptor signaling pathway	0.0313412	3	63
	positive regulation of hormone metabolic process	0.0353471	2	10
	protein neddylation	0.0353471	2	10
	positive regulation of myeloid cell differentiation	0.036769	3	69
	corticosteroid receptor signaling pathway	0.0401967	2	11
	intracellular receptor signaling pathway	0.0427571	4	210
ARNT2
HIF1A	Function	FDR	Genes in network	Genes in genome
	cellular response to hypoxia	1.33085e-24	14	90
	response to hypoxia	4.81134e-22	14	147
	response to decreased oxygen levels	4.81134e-22	15	208
	cellular response to decreased oxygen levels	4.81134e-22	14	147
	response to oxygen levels	6.50422e-22	15	220
	cellular response to oxygen levels	1.10343e-21	14	160
	regulation of DNA-templated transcription in response to stress	1.90727e-19	12	105
	regulation of transcription from RNA polymerase II promoter in response to stress	1.90727e-19	12	104
	protein hydroxylation	1.23462e-05	4	21
	iron ion binding	2.34208e-05	4	25
	positive regulation of nucleotide metabolic process	6.09503e-05	4	34
	positive regulation of ATP metabolic process	6.09503e-05	4	34
	glycolytic process	6.09503e-05	5	94
	positive regulation of purine nucleotide metabolic process	6.09503e-05	4	34
	ADP metabolic process	7.43722e-05	5	102
	ATP generation from ADP	7.43722e-05	5	100
	nucleoside diphosphate phosphorylation	7.43722e-05	5	101
	2-oxoglutarate-dependent dioxygenase activity	7.52459e-05	4	38
	purine ribonucleoside diphosphate metabolic process	7.67067e-05	5	105
	purine nucleoside diphosphate metabolic process	7.67067e-05	5	106
	nucleotide phosphorylation	8.02268e-05	5	109
	ribonucleoside diphosphate metabolic process	8.02268e-05	5	109
	RNA polymerase II-specific DNA-binding transcription factor binding	9.51763e-05	6	230
	pyruvate metabolic process	0.000119073	5	120
	nucleoside diphosphate metabolic process	0.000124164	5	122
	ATP metabolic process	0.000131393	6	248
	peptidyl-proline dioxygenase activity	0.000166488	3	12
	dioxygenase activity	0.000435475	4	65
	carbohydrate catabolic process	0.000452618	5	163
	regulation of vascular endothelial growth factor production	0.00175392	3	26
	vascular endothelial growth factor production	0.0019082	3	27
	regulation of purine nucleotide metabolic process	0.00198715	4	98
	regulation of ATP metabolic process	0.00208885	4	100
	regulation of glycolytic process	0.00210846	3	29
	regulation of nucleotide metabolic process	0.00210846	4	101
	positive regulation of small molecule metabolic process	0.00215448	4	103
	peptidyl-proline modification	0.00535236	3	40
	oxidoreductase activity, acting on paired donors, with incorporation or reduction of molecular oxygen	0.0079221	4	145
	regulation of carbohydrate metabolic process	0.00978437	4	154
	positive regulation of carbohydrate metabolic process	0.0123108	3	54
	negative regulation of intrinsic apoptotic signaling pathway	0.0209917	3	65
	positive regulation of hormone metabolic process	0.0227231	2	10
	neuron death	0.0232664	4	197
	positive regulation of myeloid cell differentiation	0.0233985	3	69
	erythrocyte homeostasis	0.0259891	3	72
	regulation of carbohydrate catabolic process	0.0283149	3	75
	intrinsic apoptotic signaling pathway	0.0283149	4	212
	regulation of cellular response to growth factor stimulus	0.0331506	4	222
	myeloid cell homeostasis	0.0378197	3	84
	regulation of hormone biosynthetic process	0.0497096	2	16
	positive regulation of collagen metabolic process	0.0497096	2	16
MYC	Function	FDR	Genes in network	Genes in genome
	cell cycle G1/S phase transition	0.00155186	6	239
	transcription regulator complex	0.00155186	6	244
ARNTL	Function	FDR	Genes in network	Genes in genome
	circadian rhythm	1.85276e-29	17	143
	rhythmic process	7.60985e-28	17	183
	regulation of circadian rhythm	2.73173e-17	10	55
	entrainment of circadian clock	7.6894e-10	6	27
	photoperiodism	7.6894e-10	6	27
	RNA polymerase II cis-regulatory region sequence-specific DNA binding	7.94261e-10	7	62
	corticosteroid receptor signaling pathway	1.0656e-09	5	11
	transcription cofactor binding	1.30693e-08	6	45
	negative regulation of intracellular steroid hormone receptor signaling pathway	1.7429e-07	5	28
	response to light stimulus	5.21431e-06	7	229
	regulation of intracellular steroid hormone receptor signaling pathway	9.95953e-06	5	63
	intracellular steroid hormone receptor signaling pathway	7.36414e-05	5	95
	steroid hormone mediated signaling pathway	9.03091e-05	5	102
	fat cell differentiation	9.03091e-05	5	102
	hormone-mediated signaling pathway	0.000182702	5	119
	cellular response to steroid hormone stimulus	0.000210438	5	124
	response to steroid hormone	0.000682693	5	159
	circadian behavior	0.00109469	3	19
	rhythmic behavior	0.00215879	3	24
	intracellular receptor signaling pathway	0.00228791	5	210
	regulation of behavior	0.00351409	3	29
	regulation of nervous system development	0.0043328	5	244
	hair cycle	0.00523648	3	34
	insulin secretion	0.00720069	4	126
	regulation of peptide hormone secretion	0.0104621	4	144
	cold-induced thermogenesis	0.0104621	4	144
	regulation of cold-induced thermogenesis	0.0104621	4	143
	molting cycle	0.0104621	3	45
	adaptive thermogenesis	0.011253	4	148
	temperature homeostasis	0.0119979	4	153
	ligand-activated transcription factor activity	0.0119979	3	49
	peptide hormone secretion	0.0160115	4	166
	heat shock protein binding	0.0166536	3	56
	regulation of hormone secretion	0.0211444	4	181
	circadian sleep/wake cycle	0.0272677	2	10
	cellular carbohydrate metabolic process	0.0283438	4	198
	hormone secretion	0.0309746	4	204
	hormone transport	0.034384	4	211
	regulation of protein secretion	0.0429776	4	225
	RNA polymerase II-specific DNA-binding transcription factor binding	0.0456225	4	230
	type B pancreatic cell differentiation	0.0469511	2	14
	regulation of fat cell differentiation	0.0494977	3	88
	behavior	0.0494977	4	239
PAX2	Function	FDR	Genes in network	Genes in genome
	branching morphogenesis of an epithelial tube	0.00194658	4	53
	metanephric nephron morphogenesis	0.00194658	3	13
	embryonic organ morphogenesis	0.00194658	5	129
	epithelial tube morphogenesis	0.00199534	5	160
	morphogenesis of a branching epithelium	0.00199534	4	64
	metanephros morphogenesis	0.00199534	3	15
	morphogenesis of a branching structure	0.00221806	4	69
	embryonic organ development	0.00340771	5	189
	metanephric nephron development	0.00372881	3	23
	regulation of kidney development	0.00372881	3	24
	animal organ formation	0.00372881	3	24
	pattern specification process	0.00511795	5	223
	ureteric bud morphogenesis	0.00630303	3	30
	ureteric bud development	0.00752744	3	34
	epithelial cell differentiation involved in kidney development	0.00752744	3	34
	mesonephric tubule morphogenesis	0.00752744	3	33
	cell differentiation involved in kidney development	0.00797	3	38
	metanephros development	0.00797	3	36
	renal tubule morphogenesis	0.00797	3	39
	nephron epithelium morphogenesis	0.00797	3	39
	ear morphogenesis	0.00797	3	36
	nephron tubule morphogenesis	0.00797	3	37
	nephron morphogenesis	0.00797	3	39
	mesonephros development	0.00881636	3	42
	inner ear development	0.00881636	3	43
	mesonephric tubule development	0.00881636	3	42
	embryonic morphogenesis	0.00881636	5	296
	mesonephric epithelium development	0.00881636	3	42
	kidney morphogenesis	0.00977431	3	45
	nephron tubule development	0.0122341	3	49
	renal tubule development	0.0125866	3	50
	regionalization	0.0128644	4	157
	ear development	0.0205023	3	60
	nephron epithelium development	0.0241618	3	64
	renal vesicle morphogenesis	0.0257938	2	10
	metanephric nephron tubule development	0.0257938	2	10
	nephron tubule epithelial cell differentiation	0.0257938	2	10
	kidney epithelium development	0.027093	3	69
	regulation of stem cell population maintenance	0.0284318	2	11
	metanephric tubule development	0.0284318	2	11
	regulation of epithelial cell differentiation involved in kidney development	0.0284318	2	11
	apoptotic process involved in development	0.0310655	2	12
	renal vesicle development	0.0310655	2	12
	metanephric glomerulus development	0.0310655	2	12
	anion:sodium symporter activity	0.0310655	2	12
	kidney mesenchyme development	0.034397	2	13
	metanephric epithelium development	0.034397	2	13
	metanephric nephron epithelium development	0.034397	2	13
	nephron development	0.0378197	3	84
	regulation of branching involved in ureteric bud morphogenesis	0.0384999	2	14
	cation:chloride symporter activity	0.0435239	2	15
	cell differentiation involved in metanephros development	0.0448525	2	16
	inorganic cation import across plasma membrane	0.0448525	3	92
	sensory organ development	0.0448525	4	249
	specification of animal organ identity	0.0448525	2	16
	heart development	0.0448525	4	251
	inorganic ion import across plasma membrane	0.0448525	3	92
	branching involved in ureteric bud morphogenesis	0.0495064	2	17
MAX	Function	FDR	Genes in network	Genes in genome
	DNA-binding transcription repressor activity	0.0495093	5	254
	transcription regulator complex	0.0495093	5	244
	G0 to G1 transition	0.0495093	3	40
	regulation of G0 to G1 transition	0.0495093	3	40
HES6	Function	FDR	Genes in network	Genes in genome
	regionalization	2.32692e-16	12	157
	pattern specification process	8.68591e-15	12	223
	regulation of nervous system development	1.73499e-14	12	244
	DNA-binding transcription repressor activity	1.07973e-08	9	254
	RNA polymerase II cis-regulatory region sequence-specific DNA binding	2.01857e-05	5	62
	regulation of neuron differentiation	3.36394e-05	5	71
	ventricular septum development	4.63543e-05	4	27
	semi-lunar valve development	0.000151586	4	37
	epithelial to mesenchymal transition	0.000187241	5	108
	cardiac septum morphogenesis	0.000225663	4	43
	heart valve morphogenesis	0.000270706	4	46
	heart valve development	0.000321521	4	49
	aorta morphogenesis	0.000345783	3	12
	cardiac septum development	0.00062947	4	60
	pulmonary valve development	0.000923111	3	17
	cardiac ventricle development	0.00108915	4	71
	chordate embryonic development	0.00115847	5	179
	aorta development	0.00115847	3	19
	embryo development ending in birth or egg hatching	0.00119129	5	182
	mesenchymal cell differentiation	0.00122673	5	185
	cardiac chamber morphogenesis	0.00127614	4	79
	atrioventricular valve development	0.00142052	3	22
	cell surface receptor signaling pathway involved in heart development	0.00178334	3	24
	regulation of DNA binding	0.00180206	4	89
	cardiac chamber development	0.00202059	4	93
	mesenchyme development	0.00202059	5	216
	aortic valve development	0.00245212	3	28
	smooth muscle cell differentiation	0.00292641	3	30
	artery morphogenesis	0.00344711	3	32
	heart development	0.00354475	5	251
	endocardial cushion development	0.00354475	3	33
	regulation of transcription regulatory region DNA binding	0.00539147	3	39
	mesenchyme morphogenesis	0.00539147	3	39
	oligodendrocyte differentiation	0.00539147	3	39
	artery development	0.00656551	3	42
	forebrain development	0.00687927	4	138
	activating transcription factor binding	0.00766094	3	45
	heart morphogenesis	0.00858784	4	148
	embryonic organ development	0.0215165	4	189
	negative regulation of neurogenesis	0.0215165	3	65
	lymphoid progenitor cell differentiation	0.0232773	2	10
	oligodendrocyte development	0.0264933	2	11
	negative regulation of glial cell differentiation	0.0264933	2	11
	axon ensheathment in central nervous system	0.0264933	2	11
	muscle cell differentiation	0.0279811	4	209
	regulation of biomineralization	0.0292505	3	76
	regulation of biomineral tissue development	0.0292505	3	76
	regulation of astrocyte differentiation	0.034397	2	13
	negative regulation of nervous system development	0.036494	3	83
	central nervous system neuron differentiation	0.038393	3	85
	brain development	0.0418815	4	241
	regulation of oligodendrocyte differentiation	0.0418815	2	15
	atrioventricular valve morphogenesis	0.0418815	2	15
HEY1	Function	FDR	Genes in network	Genes in genome
	Notch signaling pathway	3.05964e-16	11	103
	positive regulation of transcription by RNA polymerase II	8.22458e-15	11	146
	regulation of Notch signaling pathway	1.46992e-13	9	73
	cardiac chamber development	1.72631e-10	8	93
	cardiac septum development	7.49412e-10	7	60
	cardiac chamber morphogenesis	4.63219e-09	7	79
	cardiac septum morphogenesis	1.11942e-08	6	43
	atrioventricular valve development	5.27524e-08	5	22
	DNA-templated transcription, initiation	6.80231e-08	8	216
	cell surface receptor signaling pathway involved in heart development	6.80231e-08	5	24
	cardiac ventricle development	1.64312e-07	6	71
	heart development	1.79672e-07	8	251
	heart morphogenesis	1.88767e-07	7	148
	endocardial cushion development	2.69659e-07	5	33
	cardiocyte differentiation	3.15077e-07	6	83
	semi-lunar valve development	4.32181e-07	5	37
	mesenchyme morphogenesis	5.36542e-07	5	39
	heart valve morphogenesis	1.20071e-06	5	46
	atrioventricular valve morphogenesis	1.33934e-06	4	15
	muscle cell differentiation	1.38006e-06	7	209
	heart valve development	1.42881e-06	5	49
	pulmonary valve development	1.92646e-06	4	17
	endocardial cushion formation	1.92646e-06	4	17
	RNA polymerase II-specific DNA-binding transcription factor binding	2.23942e-06	7	230
	transcription regulator complex	3.24e-06	7	244
	reproductive system development	5.20192e-06	6	146
	reproductive structure development	5.20192e-06	6	146
	cardiac epithelial to mesenchymal transition	5.20192e-06	4	22
	endocardial cushion morphogenesis	8.07614e-06	4	25
	ventricular septum development	1.0816e-05	4	27
	aortic valve development	1.22032e-05	4	28
	smooth muscle cell differentiation	1.58012e-05	4	30
	embryonic organ development	2.00736e-05	6	189
	artery morphogenesis	2.00736e-05	4	32
	regulation of muscle cell differentiation	2.2678e-05	5	93
	mesenchyme development	4.19218e-05	6	216
	epithelial to mesenchymal transition	4.55452e-05	5	108
	pattern specification process	4.79767e-05	6	223
	artery development	5.25161e-05	4	42
	heart valve formation	6.13821e-05	3	10
	regulation of nervous system development	7.57002e-05	6	244
	aorta morphogenesis	0.000107028	3	12
	cardiac ventricle morphogenesis	0.000114411	4	52
	heart trabecula morphogenesis	0.000206172	3	15
	coronary vasculature development	0.000206172	3	15
	regionalization	0.000236955	5	157
	cardioblast differentiation	0.000242786	3	16
	regulation of myeloid cell differentiation	0.000299292	5	166
	embryonic placenta development	0.000326219	3	18
	negative regulation of DNA binding	0.000326219	3	18
	striated muscle tissue development	0.000326219	5	171
	aorta development	0.000371783	3	19
	cardiac atrium morphogenesis	0.000371783	3	19
	muscle tissue development	0.00039692	5	180
	vascular associated smooth muscle cell differentiation	0.000415257	3	20
	stem cell differentiation	0.000415257	5	183
	mesenchymal cell differentiation	0.000430431	5	185
	vasculogenesis	0.00046566	3	21
	endothelial cell differentiation	0.00050227	4	81
	trabecula morphogenesis	0.000598574	3	23
	negative regulation of biomineralization	0.000672409	3	24
	regulation of DNA binding	0.000697572	4	89
	cardiac atrium development	0.000739337	3	25
	muscle cell development	0.000877468	4	95
	regulation of myotube differentiation	0.000910064	3	27
	regulation of cellular response to growth factor stimulus	0.000910293	5	222
	regulation of stem cell differentiation	0.00107052	4	101
	cardiac muscle tissue development	0.00109707	4	102
	endothelium development	0.00112408	4	103
	DNA-binding transcription repressor activity	0.00165602	5	254
	placenta development	0.00185043	3	35
	cell fate commitment	0.00185043	4	118
	myeloid cell differentiation	0.00191597	5	264
	in utero embryonic development	0.00193931	3	36
	muscle organ development	0.00223261	4	125
	regulation of transcription regulatory region DNA binding	0.00241197	3	39
	negative regulation of binding	0.00246354	4	129
	regulation of hemopoiesis	0.00251202	5	283
	cardiac cell development	0.00270285	3	41
	activating transcription factor binding	0.00354319	3	45
	myoblast differentiation	0.0036954	3	46
	muscle tissue morphogenesis	0.0036954	3	46
	striated muscle cell differentiation	0.00373809	4	147
	response to hypoxia	0.00373809	4	147
	cellular response to decreased oxygen levels	0.00373809	4	147
	muscle organ morphogenesis	0.00376119	3	47
	development of primary male sexual characteristics	0.0047078	3	51
	regulation of striated muscle cell differentiation	0.0047078	3	51
	cellular response to oxygen levels	0.00498248	4	160
	male sex differentiation	0.0061063	3	56
	positive regulation of cell development	0.00692426	4	175
	regulation of BMP signaling pathway	0.00699118	3	59
	chordate embryonic development	0.00740162	4	179
	myotube differentiation	0.00756473	3	61
	embryo development ending in birth or egg hatching	0.00773216	4	182
	regulation of transmembrane receptor protein serine/threonine kinase signaling pathway	0.0111534	4	201
	BMP signaling pathway	0.0111534	3	70
	regulation of neuron differentiation	0.0114444	3	71
	atrial septum development	0.0117748	2	11
	response to decreased oxygen levels	0.0123591	4	208
	gonad development	0.0133473	3	76
	regulation of biomineral tissue development	0.0133473	3	76
	regulation of biomineralization	0.0133473	3	76
	cell proliferation involved in heart morphogenesis	0.0134418	2	12
	response to oxygen levels	0.0146324	4	220
	positive regulation of transcription from RNA polymerase II promoter involved in cellular response to chemical stimulus	0.015576	2	13
	development of primary sexual characteristics	0.0161192	3	82
	regulation of hematopoietic progenitor cell differentiation	0.0165575	3	83
	striated muscle cell development	0.0176115	3	85
	positive regulation of transmembrane receptor protein serine/threonine kinase signaling pathway	0.0193491	3	88
	cellular response to hypoxia	0.0204998	3	90
	ventricular cardiac muscle tissue morphogenesis	0.0226356	2	16
	positive regulation of heart growth	0.0251875	2	17
	positive regulation of cardiac muscle tissue growth	0.0251875	2	17
	hematopoietic progenitor cell differentiation	0.0270487	3	100
	regulation of binding	0.0273814	4	266
	sex differentiation	0.0273814	3	101
	biomineral tissue development	0.0287718	3	103
	regulation of transcription from RNA polymerase II promoter in response to stress	0.0293573	3	104
	regulation of cardiac muscle cell proliferation	0.0295548	2	19
	regulation of DNA-templated transcription in response to stress	0.0295548	3	105
	biomineralization	0.0295548	3	105
	positive regulation of transcription from RNA polymerase II promoter in response to stress	0.0317758	2	20
	transmembrane receptor protein serine/threonine kinase signaling pathway	0.0317758	4	282
	positive regulation of organ growth	0.0317758	2	20
	cardiac muscle cell proliferation	0.0317758	2	20
	homeostasis of number of cells	0.0360757	3	114
	regulation of cardiocyte differentiation	0.0379802	2	22
	cellular response to BMP stimulus	0.0433684	3	122
	regulation of cardiac muscle tissue growth	0.0446234	2	24
	positive regulation of striated muscle cell differentiation	0.0481025	2	25
	response to BMP	0.0488047	3	128
	embryonic organ morphogenesis	0.0495571	3	129
	regulation of vascular endothelial growth factor production	0.0509117	2	26
ASCL1	Function	FDR	Genes in network	Genes in genome
	regulation of neuron differentiation	1.28147e-08	7	71
	RNA polymerase II cis-regulatory region sequence-specific DNA binding	3.90198e-07	6	62
	pattern specification process	1.44511e-05	7	223
	transcription regulator complex	2.025e-05	7	244
	regionalization	4.50509e-05	6	157
	stem cell differentiation	9.38528e-05	6	183
	regulation of nervous system development	0.000443387	6	244
	DNA-binding transcription repressor activity	0.00049166	6	254
	regulation of astrocyte differentiation	0.00064886	3	13
	embryo development ending in birth or egg hatching	0.00205768	5	182
	chordate embryonic development	0.00205768	5	179
	cardiac chamber morphogenesis	0.00223325	4	79
	regulation of hematopoietic progenitor cell differentiation	0.00251429	4	83
	positive regulation of transmembrane receptor protein serine/threonine kinase signaling pathway	0.00295245	4	88
	muscle cell differentiation	0.00297994	5	209
	cardiac chamber development	0.00303386	4	93
	regulation of muscle cell differentiation	0.00303386	4	93
	cardiac muscle tissue development	0.00355242	4	102
	hematopoietic progenitor cell differentiation	0.00355242	4	100
	regulation of stem cell differentiation	0.00355242	4	101
	glial cell differentiation	0.00355242	4	101
	heart development	0.00497302	5	251
	astrocyte differentiation	0.0050183	3	34
	regulation of glial cell differentiation	0.0050183	3	34
	cell fate commitment	0.00532923	4	118
	regulation of gliogenesis	0.00678926	3	39
	oligodendrocyte differentiation	0.00678926	3	39
	gliogenesis	0.00878673	4	139
	forebrain development	0.00878673	4	138
	activating transcription factor binding	0.0094485	3	45
	heart morphogenesis	0.010527	4	148
	embryonic heart tube development	0.0107747	3	48
	cardiac muscle cell differentiation	0.0125541	3	51
	epithelial tube morphogenesis	0.0130424	4	160
	striated muscle tissue development	0.0164448	4	171
	muscle tissue development	0.0195419	4	180
	embryonic organ development	0.0230047	4	189
	lymphoid progenitor cell differentiation	0.025115	2	10
	regulation of transmembrane receptor protein serine/threonine kinase signaling pathway	0.0259045	4	201
	cardiac ventricle development	0.0259045	3	71
	oligodendrocyte development	0.0259045	2	11
	heart field specification	0.0259045	2	11
	negative regulation of glial cell differentiation	0.0259045	2	11
	axon ensheathment in central nervous system	0.0259045	2	11
	cartilage development	0.0259045	3	71
	response to decreased oxygen levels	0.0262959	4	208
	negative regulation of small molecule metabolic process	0.0262959	3	73
	response to oxygen levels	0.0320084	4	220
	regulation of cardiac muscle cell differentiation	0.0330211	2	13
	N-terminal protein amino acid acetylation	0.0330211	2	13
	cardiocyte differentiation	0.0350629	3	83
	heart formation	0.0370191	2	14
	brain development	0.0403585	4	241
	regulation of DNA binding	0.0403585	3	89
	regulation of oligodendrocyte differentiation	0.0403585	2	15
	specification of animal organ identity	0.0452713	2	16
	response to UV	0.0483527	3	96
	negative regulation of gliogenesis	0.0495064	2	17
HES1	Function	FDR	Genes in network	Genes in genome
	transcription regulator complex	0.00224759	6	244
	aorta morphogenesis	0.00224759	3	12
	aorta development	0.00656816	3	19
	artery morphogenesis	0.0249915	3	32
	artery development	0.0459586	3	42
	circadian rhythm	0.0474997	4	143
ARNT::HIF1A	Function	FDR	Genes in network	Genes in genome
	cellular response to hypoxia	1.57455e-14	10	90
	regulation of transcription from RNA polymerase II promoter in response to stress	2.62659e-14	10	104
	regulation of DNA-templated transcription in response to stress	2.62659e-14	10	105
	response to hypoxia	5.07708e-13	10	147
	cellular response to decreased oxygen levels	5.07708e-13	10	147
	cellular response to oxygen levels	1.00657e-12	10	160
	response to decreased oxygen levels	1.24131e-11	10	208
	response to oxygen levels	1.91467e-11	10	220
	peptidyl-proline dioxygenase activity	0.000499465	3	12
	erythrocyte homeostasis	0.00184388	4	72
	protein hydroxylation	0.0024553	3	21
	myeloid cell homeostasis	0.00285803	4	84
	iron ion binding	0.00358294	3	25
	vascular endothelial growth factor receptor signaling pathway	0.00546262	3	30
	smooth muscle cell differentiation	0.00546262	3	30
	artery morphogenesis	0.00624788	3	32
	homeostasis of number of cells	0.00683373	4	114
	2-oxoglutarate-dependent dioxygenase activity	0.00940696	3	38
	peptidyl-proline modification	0.010423	3	40
	artery development	0.0114896	3	42
	erythrocyte differentiation	0.0164186	3	48
	dioxygenase activity	0.0391209	3	65
	positive regulation of hormone metabolic process	0.0397655	2	10
	protein neddylation	0.0397655	2	10

## Sheet: 4th motif
Trancription factors	Functions associated to transcription factors correspoding to 4th motif
POU6F1	Function	FDR	Genes in network	Genes in genome
	cell fate specification	0.0662073	3	28
	cell fate commitment	0.0666154	4	118
GATA1::TAL1	Function	FDR	Genes in network	Genes in genome
	CHD-type complex	4.83537e-08	5	15
	transcription repressor complex	6.88401e-08	5	18
	transcription regulator complex	5.73654e-07	8	244
	myeloid cell differentiation	8.05619e-07	8	264
	histone deacetylase complex	1.82424e-06	5	39
	erythrocyte differentiation	4.49359e-06	5	48
	positive regulation of transcription by RNA polymerase II	2.08077e-05	6	146
	hematopoietic stem cell differentiation	2.25874e-05	5	72
	erythrocyte homeostasis	2.25874e-05	5	72
	regulation of hemopoiesis	2.25874e-05	7	283
	SWI/SNF superfamily-type complex	2.26557e-05	5	74
	ATPase complex	2.41946e-05	5	77
	regulation of myeloid cell differentiation	2.41946e-05	6	166
	myeloid cell homeostasis	3.16254e-05	5	84
	regulation of hematopoietic progenitor cell differentiation	3.16254e-05	5	83
	regulation of fat cell differentiation	3.75216e-05	5	88
	regulation of erythrocyte differentiation	4.43198e-05	4	33
	hematopoietic progenitor cell differentiation	6.32163e-05	5	100
	fat cell differentiation	6.32163e-05	5	102
	regulation of stem cell differentiation	6.32163e-05	5	101
	chromatin DNA binding	6.44965e-05	4	38
	nucleosome binding	6.85534e-05	4	39
	homeostasis of number of cells	9.61011e-05	5	114
	response to thyroid hormone	0.000187299	3	12
	myeloid leukocyte differentiation	0.000238075	5	139
	chromatin binding	0.00027293	5	144
	nuclear chromatin	0.000320105	5	152
	cardiac septum development	0.000320105	4	60
	granulocyte differentiation	0.000320105	3	15
	cardiac ventricle development	0.000580882	4	71
	stem cell differentiation	0.000750143	5	183
	cardiac chamber morphogenesis	0.00083747	4	79
	cardiac chamber development	0.0015629	4	93
	ventricular septum development	0.00173983	3	27
	RNA polymerase II-specific DNA-binding transcription factor binding	0.00204106	5	230
	chromatin remodeling	0.00360083	4	118
	cell fate commitment	0.00360083	4	118
	regulation of transcription regulatory region DNA binding	0.00482395	3	39
	hemostasis	0.00565338	5	292
	coagulation	0.00565338	5	293
	regulation of pri-miRNA transcription by RNA polymerase II	0.00565338	3	42
	cardiac septum morphogenesis	0.00574088	3	43
	pri-miRNA transcription by RNA polymerase II	0.00574088	3	43
	heart valve morphogenesis	0.00688689	3	46
	heart morphogenesis	0.00725196	4	148
	heart valve development	0.00797879	3	49
	megakaryocyte differentiation	0.0136849	3	59
	heart valve formation	0.0198827	2	10
	positive regulation of myeloid cell differentiation	0.0210109	3	69
	platelet morphogenesis	0.0279589	2	12
	regulation of DNA binding	0.0426869	3	89
	atrioventricular valve morphogenesis	0.0426869	2	15
	heart development	0.0482376	4	251
	DNA-binding transcription repressor activity	0.0495598	4	254
GATA2	Function	FDR	Genes in network	Genes in genome
	transcription regulator complex	7.28269e-05	7	244
	positive regulation of transcription by RNA polymerase II	7.28269e-05	6	146
	stem cell differentiation	0.000187706	6	183
	regulation of stem cell differentiation	0.000300792	5	101
	regulation of pri-miRNA transcription by RNA polymerase II	0.000350751	4	42
	pri-miRNA transcription by RNA polymerase II	0.000350751	4	43
	erythrocyte differentiation	0.000350751	4	48
	heart development	0.000350751	6	251
	heart valve morphogenesis	0.000350751	4	46
	heart valve development	0.000350751	4	49
	cell fate commitment	0.000350751	5	118
	hemostasis	0.000606984	6	292
	coagulation	0.000606984	6	293
	heart morphogenesis	0.000606984	5	148
	cardiac septum development	0.000606984	4	60
	cardiac ventricle development	0.000970463	4	71
	endothelial cell migration	0.000970463	5	173
	hematopoietic stem cell differentiation	0.000970463	4	72
	erythrocyte homeostasis	0.000970463	4	72
	cardiac chamber morphogenesis	0.00133995	4	79
	regulation of hematopoietic progenitor cell differentiation	0.00155647	4	83
	myeloid cell homeostasis	0.00155893	4	84
	regulation of fat cell differentiation	0.00179714	4	88
	cardiac chamber development	0.00206302	4	93
	regulation of muscle cell differentiation	0.00206302	4	93
	aortic valve development	0.00254643	3	28
	hematopoietic progenitor cell differentiation	0.00255303	4	100
	fat cell differentiation	0.00266431	4	102
	negative regulation of muscle cell differentiation	0.00344711	3	32
	regulation of erythrocyte differentiation	0.00366291	3	33
	epithelial cell migration	0.00369247	5	255
	homeostasis of number of cells	0.00369247	4	114
	epithelium migration	0.00400937	5	261
	myeloid cell differentiation	0.00411369	5	264
	tissue migration	0.00414538	5	266
	semi-lunar valve development	0.00433512	3	37
	regulation of hemopoiesis	0.0052956	5	283
	cardiac septum morphogenesis	0.00644973	3	43
	angiogenesis	0.00644973	5	298
	regulation of endothelial cell migration	0.00794345	4	147
	development of primary male sexual characteristics	0.0101045	3	51
	cardiac ventricle morphogenesis	0.0104607	3	52
	regulation of myeloid cell differentiation	0.0119155	4	166
	male sex differentiation	0.0124902	3	56
	heart valve formation	0.0207472	2	10
	positive regulation of hormone metabolic process	0.0207472	2	10
	regulation of epithelial cell migration	0.0239227	4	203
	atrial septum development	0.0242855	2	11
	muscle cell differentiation	0.025697	4	209
	response to thyroid hormone	0.0268836	2	12
	gonad development	0.0268836	3	76
	platelet morphogenesis	0.0268836	2	12
	development of primary sexual characteristics	0.0325425	3	82
	RNA polymerase II-specific DNA-binding transcription factor binding	0.0337944	4	230
	sprouting angiogenesis	0.0342795	3	85
	regulation of epithelial cell proliferation	0.0342795	4	232
	lymphocyte differentiation	0.0365375	4	238
	CHD-type complex	0.0369953	2	15
	granulocyte differentiation	0.0369953	2	15
	atrioventricular valve morphogenesis	0.0369953	2	15
	cardioblast differentiation	0.0415605	2	16
	DNA-binding transcription repressor activity	0.0424798	4	254
	blood vessel endothelial cell migration	0.0424798	3	95
	sex differentiation	0.0481823	3	101
	transcription repressor complex	0.0481823	2	18
	epithelial cell proliferation	0.0481823	4	266
	regulation of binding	0.0481823	4	266
PAX2	Function	FDR	Genes in network	Genes in genome
	branching morphogenesis of an epithelial tube	0.00194658	4	53
	metanephric nephron morphogenesis	0.00194658	3	13
	embryonic organ morphogenesis	0.00194658	5	129
	epithelial tube morphogenesis	0.00199534	5	160
	morphogenesis of a branching epithelium	0.00199534	4	64
	metanephros morphogenesis	0.00199534	3	15
	morphogenesis of a branching structure	0.00221806	4	69
	embryonic organ development	0.00340771	5	189
	metanephric nephron development	0.00372881	3	23
	regulation of kidney development	0.00372881	3	24
	animal organ formation	0.00372881	3	24
	pattern specification process	0.00511795	5	223
	ureteric bud morphogenesis	0.00630303	3	30
	ureteric bud development	0.00752744	3	34
	epithelial cell differentiation involved in kidney development	0.00752744	3	34
	mesonephric tubule morphogenesis	0.00752744	3	33
	cell differentiation involved in kidney development	0.00797	3	38
	metanephros development	0.00797	3	36
	renal tubule morphogenesis	0.00797	3	39
	nephron epithelium morphogenesis	0.00797	3	39
	ear morphogenesis	0.00797	3	36
	nephron tubule morphogenesis	0.00797	3	37
	nephron morphogenesis	0.00797	3	39
	mesonephros development	0.00881636	3	42
	inner ear development	0.00881636	3	43
	mesonephric tubule development	0.00881636	3	42
	embryonic morphogenesis	0.00881636	5	296
	mesonephric epithelium development	0.00881636	3	42
	kidney morphogenesis	0.00977431	3	45
	nephron tubule development	0.0122341	3	49
	renal tubule development	0.0125866	3	50
	regionalization	0.0128644	4	157
	ear development	0.0205023	3	60
	nephron epithelium development	0.0241618	3	64
	renal vesicle morphogenesis	0.0257938	2	10
	metanephric nephron tubule development	0.0257938	2	10
	nephron tubule epithelial cell differentiation	0.0257938	2	10
	kidney epithelium development	0.027093	3	69
	regulation of stem cell population maintenance	0.0284318	2	11
	metanephric tubule development	0.0284318	2	11
	regulation of epithelial cell differentiation involved in kidney development	0.0284318	2	11
	apoptotic process involved in development	0.0310655	2	12
	renal vesicle development	0.0310655	2	12
	metanephric glomerulus development	0.0310655	2	12
	anion:sodium symporter activity	0.0310655	2	12
	kidney mesenchyme development	0.034397	2	13
	metanephric epithelium development	0.034397	2	13
	metanephric nephron epithelium development	0.034397	2	13
	nephron development	0.0378197	3	84
	regulation of branching involved in ureteric bud morphogenesis	0.0384999	2	14
	cation:chloride symporter activity	0.0435239	2	15
	cell differentiation involved in metanephros development	0.0448525	2	16
	inorganic cation import across plasma membrane	0.0448525	3	92
	sensory organ development	0.0448525	4	249
	specification of animal organ identity	0.0448525	2	16
	heart development	0.0448525	4	251
	inorganic ion import across plasma membrane	0.0448525	3	92
	branching involved in ureteric bud morphogenesis	0.0495064	2	17
GATA4	Function	FDR	Genes in network	Genes in genome
	heart morphogenesis	5.38853e-19	13	148
	cardiac septum development	1.05355e-16	10	60
	heart development	2.07988e-16	13	251
	cardiac chamber morphogenesis	9.96906e-16	10	79
	cardiac chamber development	4.44077e-15	10	93
	cardiac septum morphogenesis	1.6876e-13	8	43
	cardiac ventricle development	1.04396e-11	8	71
	ventricular septum development	4.80588e-10	6	27
	cardiocyte differentiation	4.41213e-09	7	83
	heart valve morphogenesis	1.20159e-08	6	46
	heart valve development	1.62759e-08	6	49
	atrioventricular valve development	3.51683e-08	5	22
	mesenchyme development	4.99957e-08	8	216
	positive regulation of transcription by RNA polymerase II	1.5924e-07	7	146
	endocardial cushion development	2.51681e-07	5	33
	semi-lunar valve development	3.84161e-07	5	37
	atrial septum development	3.84161e-07	4	11
	striated muscle tissue development	3.84161e-07	7	171
	mesenchyme morphogenesis	4.80063e-07	5	39
	muscle tissue development	4.85822e-07	7	180
	mesenchymal cell differentiation	5.60565e-07	7	185
	embryonic organ development	6.21489e-07	7	189
	atrioventricular valve morphogenesis	1.10641e-06	4	15
	DNA-templated transcription, initiation	1.38893e-06	7	216
	cardioblast differentiation	1.38893e-06	4	16
	cardiac ventricle morphogenesis	1.56969e-06	5	52
	pattern specification process	1.60568e-06	7	223
	cardiac atrium morphogenesis	2.57358e-06	4	19
	regulation of cardiocyte differentiation	4.6798e-06	4	22
	cell surface receptor signaling pathway involved in heart development	6.56235e-06	4	24
	endocardial cushion morphogenesis	7.319e-06	4	25
	cardiac atrium development	7.319e-06	4	25
	aortic valve development	1.11264e-05	4	28
	regulation of transcription initiation from RNA polymerase II promoter	1.11264e-05	4	28
	outflow tract morphogenesis	1.40455e-05	4	30
	smooth muscle cell differentiation	1.40455e-05	4	30
	negative regulation of transcription by RNA polymerase II	2.03631e-05	4	33
	regulation of DNA-templated transcription, initiation	2.53353e-05	4	35
	in utero embryonic development	2.77522e-05	4	36
	cardiac muscle tissue development	3.08372e-05	5	102
	muscle cell differentiation	3.08372e-05	6	209
	epithelial to mesenchymal transition	4.01231e-05	5	108
	heart valve formation	5.58019e-05	3	10
	positive regulation of stem cell differentiation	5.58019e-05	3	10
	muscle tissue morphogenesis	6.61725e-05	4	46
	muscle organ morphogenesis	7.07069e-05	4	47
	cardiac muscle cell apoptotic process	7.17809e-05	3	11
	transcription initiation from RNA polymerase II promoter	8.03804e-05	4	49
	columnar/cuboidal epithelial cell differentiation	0.000108523	4	53
	positive regulation of cardiocyte differentiation	0.000110184	3	13
	negative regulation of muscle cell apoptotic process	0.000110184	3	13
	striated muscle cell apoptotic process	0.000110184	3	13
	regulation of striated muscle cell apoptotic process	0.000110184	3	13
	reproductive system development	0.00013818	5	146
	reproductive structure development	0.00013818	5	146
	coronary vasculature development	0.000165674	3	15
	regionalization	0.000191226	5	157
	pulmonary valve development	0.000238736	3	17
	embryonic placenta development	0.000281434	3	18
	regulation of neuron differentiation	0.000290441	4	71
	chordate embryonic development	0.000341843	5	179
	embryo development ending in birth or egg hatching	0.000365072	5	182
	stem cell differentiation	0.000369118	5	183
	vasculogenesis	0.000422005	3	21
	positive regulation of DNA-templated transcription, initiation	0.00055253	3	23
	Notch signaling pathway	0.00117517	4	103
	regulation of muscle cell apoptotic process	0.00120499	3	30
	muscle cell apoptotic process	0.00120499	3	30
	DNA-binding transcription repressor activity	0.00168002	5	254
	placenta development	0.00188057	3	35
	regulation of binding	0.0020435	5	266
	muscle organ development	0.00232564	4	125
	regulation of transcription regulatory region DNA binding	0.0025111	3	39
	hemostasis	0.00308092	5	292
	coagulation	0.00309051	5	293
	embryonic morphogenesis	0.00316485	5	296
	determination of heart left/right asymmetry	0.00316485	3	43
	embryonic heart tube morphogenesis	0.00316485	3	43
	embryonic heart tube development	0.00436443	3	48
	digestive tract development	0.00517858	3	51
	epithelial tube morphogenesis	0.00547457	4	160
	determination of left/right symmetry	0.00745003	3	58
	digestive system development	0.00815153	3	60
	aorta morphogenesis	0.0166422	2	12
	determination of bilateral symmetry	0.0202912	3	82
	specification of symmetry	0.0207931	3	83
	heart formation	0.0221264	2	14
	regulation of DNA binding	0.0250129	3	89
	transcription regulator complex	0.0257598	4	244
	ventricular cardiac muscle tissue morphogenesis	0.0278593	2	16
	regulation of muscle cell differentiation	0.0278593	3	93
	regulation of cell cycle arrest	0.0290413	3	95
	endocardial cushion formation	0.030875	2	17
	negative regulation of DNA binding	0.0339812	2	18
	regulation of stem cell differentiation	0.0339812	3	101
	aorta development	0.0371721	2	19
	regulation of cardiac muscle cell proliferation	0.0371721	2	19
	vascular associated smooth muscle cell differentiation	0.0404419	2	20
	cardiac muscle cell proliferation	0.0404419	2	20
	cell cycle arrest	0.044641	3	113
	cardiac epithelial to mesenchymal transition	0.0481333	2	22
BACH2	Function	FDR	Genes in network	Genes in genome
	DNA-binding transcription repressor activity	2.37002e-06	8	254
TRPS1	Function	FDR	Genes in network	Genes in genome
	hemostasis	0.00151746	6	292
	coagulation	0.00151746	6	293
	male sex differentiation	0.00151746	4	56
	digestive tract development	0.00151746	4	51
	digestive system development	0.00151746	4	60
	development of primary male sexual characteristics	0.00151746	4	51
	gonad development	0.00327586	4	76
	development of primary sexual characteristics	0.00389151	4	82
	aortic valve development	0.00652044	3	28
	regulation of stem cell differentiation	0.00652044	4	101
	sex differentiation	0.00652044	4	101
	semi-lunar valve development	0.0130054	3	37
	reproductive system development	0.0191964	4	146
	reproductive structure development	0.0191964	4	146
	heart valve morphogenesis	0.0191964	3	46
	heart morphogenesis	0.0191964	4	148
	positive regulation of transcription by RNA polymerase II	0.0191964	4	146
	heart valve development	0.0203902	3	49
	columnar/cuboidal epithelial cell differentiation	0.0244943	3	53
	cardiac septum development	0.0338288	3	60
	stem cell differentiation	0.0357357	4	183

## Sheet: Functional clusters
		piRNA domains
Functional Clusters	Functions (Gene Ontology terms)	1st motif	2nd motif	3rd motif	4th motif
Cardiovascular system development	heart morphogenesis	CACAATG	ACCACTANACCAC	AKCACGYTCSC	CTCATCAKYG
Cardiovascular system development	heart development		ACCACTANACCAC	AKCACGYTCSC	CTCATCAKYG
Cardiovascular system development	cardiac chamber morphogenesis		ACCACTANACCAC	AKCACGYTCSC	CTCATCAKYG
Cardiovascular system development	cardiocyte differentiation		ACCACTANACCAC	AKCACGYTCSC	CTCATCAKYG
Cardiovascular system development	cardiac chamber development		ACCACTANACCAC	AKCACGYTCSC	CTCATCAKYG
Cardiovascular system development	cardiac septum development		ACCACTANACCAC	AKCACGYTCSC	CTCATCAKYG
Cardiovascular system development	striated muscle tissue development		ACCACTANACCAC	AKCACGYTCSC	CTCATCAKYG
Cardiovascular system development	trabecula morphogenesis		ACCACTANACCAC	AKCACGYTCSC
Cardiovascular system development	cardiac ventricle morphogenesis		ACCACTANACCAC	AKCACGYTCSC	CTCATCAKYG
Cardiovascular system development	cardiac muscle tissue development		ACCACTANACCAC	AKCACGYTCSC	CTCATCAKYG
Cardiovascular system development	determination of left/right symmetry	CACAATG	ACCACTANACCAC		CTCATCAKYG
Cardiovascular system development	cardiac ventricle development		ACCACTANACCAC	AKCACGYTCSC	CTCATCAKYG
Cardiovascular system development	cardioblast differentiation	CACAATG	ACCACTANACCAC	AKCACGYTCSC	CTCATCAKYG
Cardiovascular system development	determination of bilateral symmetry		ACCACTANACCAC		CTCATCAKYG
Cardiovascular system development	specification of symmetry		ACCACTANACCAC		CTCATCAKYG
Cardiovascular system development	regulation of cardiocyte differentiation		ACCACTANACCAC	AKCACGYTCSC	CTCATCAKYG
Cardiovascular system development	positive regulation of cardiocyte differentiation		ACCACTANACCAC		CTCATCAKYG
Cardiovascular system development	determination of heart left/right asymmetry	CACAATG	ACCACTANACCAC		CTCATCAKYG
Cardiovascular system development	embryonic heart tube morphogenesis	CACAATG	ACCACTANACCAC		CTCATCAKYG
Cardiovascular system development	regulation of muscle cell differentiation		ACCACTANACCAC	AKCACGYTCSC	CTCATCAKYG
Cardiovascular system development	embryonic heart tube development	CACAATG	ACCACTANACCAC	AKCACGYTCSC	CTCATCAKYG
Cardiovascular system development	cardiac muscle cell differentiation		ACCACTANACCAC
Cardiovascular system development	regulation of heart growth		ACCACTANACCAC
Cardiovascular system development	ventricular cardiac muscle tissue development		ACCACTANACCAC
Cardiovascular system development	cardiac muscle tissue morphogenesis		ACCACTANACCAC
Cardiovascular system development	heart growth		ACCACTANACCAC
Cardiovascular system development	cardiac septum morphogenesis		ACCACTANACCAC	AKCACGYTCSC	CTCATCAKYG
Cardiovascular system development	cardiac atrium morphogenesis		ACCACTANACCAC	AKCACGYTCSC	CTCATCAKYG
Cardiovascular system development	regulation of cardiac muscle cell proliferation		ACCACTANACCAC	AKCACGYTCSC	CTCATCAKYG
Cardiovascular system development	cardiac atrium development		ACCACTANACCAC	AKCACGYTCSC	CTCATCAKYG
Cardiovascular system development	outflow tract morphogenesis		ACCACTANACCAC		CTCATCAKYG
Cardiovascular system development	striated muscle cell proliferation		ACCACTANACCAC
Cardiovascular system development	cardiac muscle cell development		ACCACTANACCAC
Cardiovascular system development	cardiac muscle hypertrophy		ACCACTANACCAC	AKCACGYTCSC
Cardiovascular system development	cardiac cell development		ACCACTANACCAC
Cardiovascular system development	striated muscle hypertrophy		ACCACTANACCAC
Cardiovascular system development	cardiac muscle cell apoptotic process		ACCACTANACCAC		CTCATCAKYG
Cardiovascular system development	regulation of cardiac muscle cell differentiation		ACCACTANACCAC	AKCACGYTCSC
Cardiovascular system development	ventricular septum development		ACCACTANACCAC		CTCATCAKYG
Cardiovascular system development	regulation of cardiac muscle hypertrophy		ACCACTANACCAC
Cardiovascular system development	endocardial cushion development		ACCACTANACCAC	AKCACGYTCSC	CTCATCAKYG
Cardiovascular system development	myofibril assembly		ACCACTANACCAC
Cardiovascular system development	heart valve morphogenesis		ACCACTANACCAC	AKCACGYTCSC	CTCATCAKYG
Cardiovascular system development	heart valve development		ACCACTANACCAC	AKCACGYTCSC	CTCATCAKYG
Cardiovascular system development	heart valve formation		ACCACTANACCAC		CTCATCAKYG
Cardiovascular system development	cardiac muscle adaptation		ACCACTANACCAC
Cardiovascular system development	atrial septum development		ACCACTANACCAC	AKCACGYTCSC	CTCATCAKYG
Cardiovascular system development	heart formation		ACCACTANACCAC	AKCACGYTCSC	CTCATCAKYG
Cardiovascular system development	atrioventricular valve morphogenesis		ACCACTANACCAC	AKCACGYTCSC	CTCATCAKYG
Cardiovascular system development	coronary vasculature development		ACCACTANACCAC	AKCACGYTCSC	CTCATCAKYG
Cardiovascular system development	ventricular cardiac muscle tissue morphogenesis		ACCACTANACCAC	AKCACGYTCSC	CTCATCAKYG
Cardiovascular system development	negative regulation of locomotion		ACCACTANACCAC
Cardiovascular system development	aorta development		ACCACTANACCAC	AKCACGYTCSC	CTCATCAKYG
Cardiovascular system development	atrioventricular valve development		ACCACTANACCAC	AKCACGYTCSC	CTCATCAKYG
Cardiovascular system development	endocardial cushion morphogenesis		ACCACTANACCAC	AKCACGYTCSC	CTCATCAKYG
Cardiovascular system development	artery morphogenesis			AKCACGYTCSC
Cardiovascular system development	artery development			AKCACGYTCSC
Cardiovascular system development	semi-lunar valve development			AKCACGYTCSC	CTCATCAKYG
Cardiovascular system development	aorta morphogenesis			AKCACGYTCSC	CTCATCAKYG
Cardiovascular system development	pulmonary valve development			AKCACGYTCSC	CTCATCAKYG
Cardiovascular system development	cell surface receptor signaling pathway involved in heart development			AKCACGYTCSC	CTCATCAKYG
Cardiovascular system development	aortic valve development			AKCACGYTCSC	CTCATCAKYG
Cardiovascular system development	endocardial cushion formation			AKCACGYTCSC	CTCATCAKYG
Cardiovascular system development	cardiac epithelial to mesenchymal transition			AKCACGYTCSC	CTCATCAKYG
Cardiovascular system development	heart trabecula morphogenesis			AKCACGYTCSC
Cardiovascular system development	positive regulation of heart growth			AKCACGYTCSC
Cardiovascular system development	positive regulation of cardiac muscle tissue growth			AKCACGYTCSC
Cardiovascular system development	cardiac muscle tissue development			AKCACGYTCSC
Cardiovascular system development	heart field specification			AKCACGYTCSC
Digestive system development	digestive tract development				CTCATCAKYG
Digestive system development	digestive system development				CTCATCAKYG
DNA interaction/gene expression regulation	Trancription by RNA polymerase III	CACAATG
DNA interaction/gene expression regulation	snRNA transcription	CACAATG
DNA interaction/gene expression regulation	ncRNA transcription	CACAATG
DNA interaction/gene expression regulation	General transcription initiation factor activity	CACAATG
DNA interaction/gene expression regulation	Nuclear DNA-directed RNA polymerase complex	CACAATG
DNA interaction/gene expression regulation	DNA-directed RNA polymerase complex	CACAATG
DNA interaction/gene expression regulation	RNA polymerase complex	CACAATG
DNA interaction/gene expression regulation	Transcription regulator complex	CACAATG	ACCACTANACCAC	AKCACGYTCSC	CTCATCAKYG
DNA interaction/gene expression regulation	Transferase complex, transferring phosphorus-containing groups	CACAATG
DNA interaction/gene expression regulation	5'-3' RNA polymerase activity	CACAATG
DNA interaction/gene expression regulation	Nucleotidyltransferase activity	CACAATG
DNA interaction/gene expression regulation	General transcription initiation factor binding	CACAATG
DNA interaction/gene expression regulation	Regulation of transcription by RNA polymerase III	CACAATG
DNA interaction/gene expression regulation	Nuclear DNA-directed RNA polymerase complex	CACAATG
DNA interaction/gene expression regulation	DNA-directed RNA polymerase complex	CACAATG
DNA interaction/gene expression regulation	Transferase complex, transferrring phosphorus-containing groups	CACAATG
DNA interaction/gene expression regulation	5'-3' RNA polymerase activity	CACAATG
DNA interaction/gene expression regulation	RNA polymerase activity	CACAATG
DNA interaction/gene expression regulation	Nucleotidyltransferase activity	CACAATG
DNA interaction/gene expression regulation	Trancription regulator complex	CACAATG
DNA interaction/gene expression regulation	Ligand-activated transcription factor activity	CACAATG	ACCACTANACCAC	AKCACGYTCSC
DNA interaction/gene expression regulation	DNA-templated transcription, initiation	CACAATG	ACCACTANACCAC		CTCATCAKYG
DNA interaction/gene expression regulation	RNA polymerase II-specific DNA-binding transcription factor binding	CACAATG		AKCACGYTCSC	CTCATCAKYG
DNA interaction/gene expression regulation	RNA polymerase II-specific hormone stimulus	CACAATG
DNA interaction/gene expression regulation	Transcription coactivator acitivity	CACAATG
DNA interaction/gene expression regulation	DNA helicase complex	CACAATG
DNA interaction/gene expression regulation	INO80-type complex	CACAATG
DNA interaction/gene expression regulation	SWI/SNF superfamily-type complex	CACAATG			CTCATCAKYG
DNA interaction/gene expression regulation	ATPase complex	CACAATG			CTCATCAKYG
DNA interaction/gene expression regulation	Nuclear chromatin	CACAATG			CTCATCAKYG
DNA interaction/gene expression regulation	Histone methylstransferase complex	CACAATG
DNA interaction/gene expression regulation	Methyltransferase complex	CACAATG
DNA interaction/gene expression regulation	DNA-dependent ATPase binding	CACAATG
DNA interaction/gene expression regulation	Transcription corepressor binding	CACAATG
DNA interaction/gene expression regulation	H4/H2A hisotne acetyltransferase complex	CACAATG
DNA interaction/gene expression regulation	RNA polymerase II transcription cofactor binding	CACAATG
DNA interaction/gene expression regulation	helicase acitvity	CACAATG
DNA interaction/gene expression regulation	Chromatin binding	CACAATG	ACCACTANACCAC		CTCATCAKYG
DNA interaction/gene expression regulation	chromatin remodelling	CACAATG
DNA interaction/gene expression regulation	PcG protein complex	CACAATG
DNA interaction/gene expression regulation	histone-lysine N-methyltransferase acitivty	CACAATG
DNA interaction/gene expression regulation	Protein modification by small protein removal	CACAATG
DNA interaction/gene expression regulation	Protein-lysine N-methyltransferase activity	CACAATG
DNA interaction/gene expression regulation	H4 histone acetyltransferase complex	CACAATG
DNA interaction/gene expression regulation	Transcription cofactor binding	CACAATG		AKCACGYTCSC
DNA interaction/gene expression regulation	Histone methyltransferase activity	CACAATG
DNA interaction/gene expression regulation	Lysine N-methyltransferase activity	CACAATG
DNA interaction/gene expression regulation	Catalytic activity, acting on DNA	CACAATG
DNA interaction/gene expression regulation	ATPase activity	CACAATG
DNA interaction/gene expression regulation	Small nucleolar ribonucleoprotein complex assembly	CACAATG
DNA interaction/gene expression regulation	Histone acetyltransferase complex	CACAATG
DNA interaction/gene expression regulation	Protein methyltransferase complex	CACAATG
DNA interaction/gene expression regulation	DNA templated transcription, initiation	CACAATG
DNA interaction/gene expression regulation	RNA polymerase II transcription regulator complex	CACAATG	ACCACTANACCAC	AKCACGYTCSC
DNA interaction/gene expression regulation	DNA-templated transcription, initiation	CACAATG	ACCACTANACCAC
DNA interaction/gene expression regulation	transcription cofactor binding	CACAATG	ACCACTANACCAC
DNA interaction/gene expression regulation	histone deacetylation	CACAATG	ACCACTANACCAC
DNA interaction/gene expression regulation	RNA polymerase II cis-regulatory region sequence-specific DNA binding		ACCACTANACCAC	AKCACGYTCSC
DNA interaction/gene expression regulation	regulation of viral transcription		ACCACTANACCAC
DNA interaction/gene expression regulation	viral transcription		ACCACTANACCAC
DNA interaction/gene expression regulation	positive regulation of transcription by RNA polymerase II		ACCACTANACCAC	AKCACGYTCSC	CTCATCAKYG
DNA interaction/gene expression regulation	regulation of histone modification		ACCACTANACCAC
DNA interaction/gene expression regulation	positive regulation of DNA-templated transcription, initiation		ACCACTANACCAC		CTCATCAKYG
DNA interaction/gene expression regulation	positive regulation of histone methylation		ACCACTANACCAC
DNA interaction/gene expression regulation	regulation of transcription initiation from RNA polymerase II promoter		ACCACTANACCAC		CTCATCAKYG
DNA interaction/gene expression regulation	regulation of transcription regulatory region DNA binding			AKCACGYTCSC	CTCATCAKYG
DNA interaction/gene expression regulation	DNA-binding transcription repressor activity			AKCACGYTCSC	CTCATCAKYG
DNA interaction/gene expression regulation	regulation of DNA binding			AKCACGYTCSC	CTCATCAKYG
DNA interaction/gene expression regulation	activating transcription factor binding			AKCACGYTCSC
DNA interaction/gene expression regulation	negative regulation of DNA binding			AKCACGYTCSC	CTCATCAKYG
DNA interaction/gene expression regulation	negative regulation of binding			AKCACGYTCSC
DNA interaction/gene expression regulation	positive regulation of transcription from RNA polymerase II promoter involved in cellular response to chemical stimulus			AKCACGYTCSC
DNA interaction/gene expression regulation	CHD-type complex				CTCATCAKYG
DNA interaction/gene expression regulation	transcription repressor complex				CTCATCAKYG
DNA interaction/gene expression regulation	histone deacetylase complex				CTCATCAKYG
DNA interaction/gene expression regulation	chromatin DNA binding				CTCATCAKYG
DNA interaction/gene expression regulation	nucleosome binding				CTCATCAKYG
DNA interaction/gene expression regulation	chromatin remodeling	CACAATG			CTCATCAKYG
DNA interaction/gene expression regulation	regulation of pri-miRNA transcription by RNA polymerase II				CTCATCAKYG
DNA interaction/gene expression regulation	pri-miRNA transcription by RNA polymerase II				CTCATCAKYG
DNA interaction/gene expression regulation	regulation of binding				CTCATCAKYG
DNA interaction/gene expression regulation	negative regulation of transcription by RNA polymerase II				CTCATCAKYG
DNA interaction/gene expression regulation	regulation of DNA-templated transcription, initiation		ACCACTANACCAC		CTCATCAKYG
DNA interaction/gene expression regulation	transcription initiation from RNA polymerase II promoter				CTCATCAKYG
DNA interaction/gene expression regulation	transcription by RNA polymerase III	CACAATG
DNA interaction/gene expression regulation	transcription coactivator activity	CACAATG
DNA interaction/gene expression regulation	histone methyltransferase complex	CACAATG
DNA interaction/gene expression regulation	DNA-dependent ATPase activity	CACAATG
DNA interaction/gene expression regulation	H4/H2A histone acetyltransferase complex	CACAATG
DNA interaction/gene expression regulation	helicase activity	CACAATG
DNA interaction/gene expression regulation	nucleolus	CACAATG
DNA interaction/gene expression regulation	histone-lysine N-methyltransferase activity	CACAATG
Embryonic development EARLY STAGES, UP TO GASTRULATION)	mesenchyme development		ACCACTANACCAC	AKCACGYTCSC	CTCATCAKYG
Embryonic development EARLY STAGES, UP TO GASTRULATION)	epithelial to mesenchymal transition		ACCACTANACCAC	AKCACGYTCSC	CTCATCAKYG
Embryonic development EARLY STAGES, UP TO GASTRULATION)	embryonic morphogenesis	CACAATG	ACCACTANACCAC	AKCACGYTCSC	CTCATCAKYG
Embryonic development EARLY STAGES, UP TO GASTRULATION)	mesenchymal cell differentiation		ACCACTANACCAC	AKCACGYTCSC	CTCATCAKYG
Embryonic development EARLY STAGES, UP TO GASTRULATION)	pattern specification process		ACCACTANACCAC	AKCACGYTCSC	CTCATCAKYG
Embryonic development EARLY STAGES, UP TO GASTRULATION)	embryo development ending in birth or egg hatching	CACAATG	ACCACTANACCAC	AKCACGYTCSC	CTCATCAKYG
Embryonic development EARLY STAGES, UP TO GASTRULATION)	in utero embryonic development		ACCACTANACCAC	AKCACGYTCSC	CTCATCAKYG
Embryonic development EARLY STAGES, UP TO GASTRULATION)	developmental growth		ACCACTANACCAC
Embryonic development EARLY STAGES, UP TO GASTRULATION)	regulation of developmental growth		ACCACTANACCAC
Embryonic development EARLY STAGES, UP TO GASTRULATION)	regulation of epithelial to mesenchymal transition		ACCACTANACCAC
Embryonic development EARLY STAGES, UP TO GASTRULATION)	formation of primary germ layer	CACAATG
Embryonic development EARLY STAGES, UP TO GASTRULATION)	blastocyst development		ACCACTANACCAC
Embryonic development EARLY STAGES, UP TO GASTRULATION)	cellular component assembly involved in morphogenesis		ACCACTANACCAC
Embryonic development EARLY STAGES, UP TO GASTRULATION)	pattern specification process			AKCACGYTCSC
Embryonic development EARLY STAGES, UP TO GASTRULATION)	endoderm development	CACAATG
Embryonic development EARLY STAGES, UP TO GASTRULATION)	gastrulation	CACAATG
Embryonic development LATE STAGES, TISSUE PATTERNING)	Pattern formation	CACAATG
Embryonic development LATE STAGES, TISSUE PATTERNING)	embryonic organ morphogenesis	CACAATG	ACCACTANACCAC	AKCACGYTCSC	CTCATCAKYG
Embryonic development LATE STAGES, TISSUE PATTERNING)	regionalization		ACCACTANACCAC	AKCACGYTCSC	CTCATCAKYG
Embryonic development LATE STAGES, TISSUE PATTERNING)	embryonic organ development	CACAATG	ACCACTANACCAC	AKCACGYTCSC	CTCATCAKYG
Embryonic development LATE STAGES, TISSUE PATTERNING)	pattern specification process		ACCACTANACCAC	AKCACGYTCSC
Embryonic development LATE STAGES, TISSUE PATTERNING)	regulation of organ growth		ACCACTANACCAC
Embryonic development LATE STAGES, TISSUE PATTERNING)	organ growth		ACCACTANACCAC
Embryonic development LATE STAGES, TISSUE PATTERNING)	positive regulation of organ growth		ACCACTANACCAC	AKCACGYTCSC
Embryonic development LATE STAGES, TISSUE PATTERNING)	positive regulation of growth		ACCACTANACCAC
Embryonic development LATE STAGES, TISSUE PATTERNING)	animal organ formation		ACCACTANACCAC	AKCACGYTCSC	CTCATCAKYG
Embryonic development LATE STAGES, TISSUE PATTERNING)	embryonic limb morphogenesis		ACCACTANACCAC
Embryonic development LATE STAGES, TISSUE PATTERNING)	positive regulation of biomineral tissue development			AKCACGYTCSC
Embryonic development LATE STAGES, TISSUE PATTERNING)	specification of animal organ identity			AKCACGYTCSC	CTCATCAKYG
Embryonic development LATE STAGES, TISSUE PATTERNING)	regulation of biomineral tissue development			AKCACGYTCSC
Embryonic development LATE STAGES, TISSUE PATTERNING)	biomineral tissue development			AKCACGYTCSC
Embryonic development LATE STAGES, TISSUE PATTERNING)	tissue migration	CACAATG	ACCACTANACCAC		CTCATCAKYG
Endocrine signaling	Cellular response to steroid hormone stimulus	CACAATG	ACCACTANACCAC
Endocrine signaling	Response to steroid hormone	CACAATG	ACCACTANACCAC
Endocrine signaling	Steroid hormone mediated signalling pathway	CACAATG	ACCACTANACCAC
Endocrine signaling	Hormone mediated signalling pathway	CACAATG	ACCACTANACCAC
Endocrine signaling	Intracellular receptor signalling pathway	CACAATG	ACCACTANACCAC
Endocrine signaling	Response to thyroid hormone				CTCATCAKYG
Endocrine signaling	Hormone receptor binding	CACAATG
Endocrine signaling	Cellular response to corticosteroid stimulus	CACAATG
Endocrine signaling	Response to glucocorticoid	CACAATG
Endocrine signaling	Intracellular steroid hormone receptor signalling pathway		ACCACTANACCAC
Endocrine signaling	corticosteroid receptor signaling pathway		ACCACTANACCAC	AKCACGYTCSC
Endocrine signaling	hormone-mediated signaling pathway	CACAATG	ACCACTANACCAC	AKCACGYTCSC
Endocrine signaling	hormone receptor binding		ACCACTANACCAC
Endocrine signaling	steroid hormone mediated signaling pathway	CACAATG	ACCACTANACCAC	AKCACGYTCSC
Endocrine signaling	negative regulation of intracellular steroid hormone receptor signaling pathway			AKCACGYTCSC
Endocrine signaling	cellular response to steroid hormone stimulus			AKCACGYTCSC
Endocrine signaling	response to steroid hormone			AKCACGYTCSC
Endocrine signaling	regulation of intracellular steroid hormone receptor signaling pathway			AKCACGYTCSC
Endocrine signaling	intracellular steroid hormone receptor signaling pathway			AKCACGYTCSC
Endocrine signaling	insulin secretion			AKCACGYTCSC
Endocrine signaling	regulation of peptide hormone secretion			AKCACGYTCSC
Endocrine signaling	peptide hormone secretion			AKCACGYTCSC
Endocrine signaling	regulation of hormone secretion			AKCACGYTCSC
Endocrine signaling	hormone secretion			AKCACGYTCSC
Endocrine signaling	hormone transport			AKCACGYTCSC
Endocrine signaling	regulation of protein secretion			AKCACGYTCSC
Endocrine signaling	steroid hormone receptor binding	CACAATG
Endocrine signaling	response to corticosteroid	CACAATG
Endocrine system development	Nuclear hormone receptor activity	CACAATG
Endocrine system development	Steroid hormone receptor activity	CACAATG
Endocrine system development	nuclear hormone receptor binding	CACAATG	ACCACTANACCAC
Endocrine system development	endocrine pancreas development			AKCACGYTCSC
Endocrine system development	negative regulation of steroid biosynthetic process		ACCACTANACCAC
Endocrine system development	negative regulation of steroid metabolic process		ACCACTANACCAC
Endocrine system development	gland development		ACCACTANACCAC
General cellular processes / pleiotropic signal transduction pathways	Response to epidermal growth factor	CACAATG
General cellular processes / pleiotropic signal transduction pathways	Nuclear receptor binding	CACAATG
General cellular processes / pleiotropic signal transduction pathways	Intracellular receptor signaling pathway		ACCACTANACCAC	AKCACGYTCSC
General cellular processes / pleiotropic signal transduction pathways	Response to transforming growth factor beta	CACAATG	ACCACTANACCAC
General cellular processes / pleiotropic signal transduction pathways	SMAD binding	CACAATG	ACCACTANACCAC
General cellular processes / pleiotropic signal transduction pathways	Cellular response to BMP stimulus	CACAATG	ACCACTANACCAC	AKCACGYTCSC
General cellular processes / pleiotropic signal transduction pathways	Cellular reponse to transforming growth factor beta stimulus	CACAATG
General cellular processes / pleiotropic signal transduction pathways	solute: anion antiporter activity		ACCACTANACCAC
General cellular processes / pleiotropic signal transduction pathways	cyclin-dependent protein kinase activity		ACCACTANACCAC
General cellular processes / pleiotropic signal transduction pathways	negative regulation of stress-activated MAPK cascade		ACCACTANACCAC
General cellular processes / pleiotropic signal transduction pathways	negative regulation of stress-activated protein kinase signaling cascade		ACCACTANACCAC
General cellular processes / pleiotropic signal transduction pathways	cyclin-dependent protein kinase holoenzyme complex		ACCACTANACCAC
General cellular processes / pleiotropic signal transduction pathways	nuclear cyclin-dependent protein kinase holoenzyme complex		ACCACTANACCAC
General cellular processes / pleiotropic signal transduction pathways	serine/threonine protein kinase complex		ACCACTANACCAC
General cellular processes / pleiotropic signal transduction pathways	positive regulation of transmembrane receptor protein serine/threonine kinase signaling pathway		ACCACTANACCAC	AKCACGYTCSC
General cellular processes / pleiotropic signal transduction pathways	response to BMP	CACAATG	ACCACTANACCAC
General cellular processes / pleiotropic signal transduction pathways	regulation of pathway-restricted SMAD protein phosphorylation		ACCACTANACCAC
General cellular processes / pleiotropic signal transduction pathways	nodal signaling pathway		ACCACTANACCAC
General cellular processes / pleiotropic signal transduction pathways	transmembrane receptor protein serine/threonine kinase binding		ACCACTANACCAC
General cellular processes / pleiotropic signal transduction pathways	receptor serine/threonine kinase binding		ACCACTANACCAC
General cellular processes / pleiotropic signal transduction pathways	activin receptor signaling pathway		ACCACTANACCAC
General cellular processes / pleiotropic signal transduction pathways	regulation of transcription from RNA polymerase II promoter in response to stress			AKCACGYTCSC
General cellular processes / pleiotropic signal transduction pathways	regulation of DNA-templated transcription in response to stress			AKCACGYTCSC
General cellular processes / pleiotropic signal transduction pathways	heat shock protein binding			AKCACGYTCSC
General cellular processes / pleiotropic signal transduction pathways	positive regulation of transcription from RNA polymerase II promoter in response to stress			AKCACGYTCSC
General cellular processes / pleiotropic signal transduction pathways	receptor complex			AKCACGYTCSC
General cellular processes / pleiotropic signal transduction pathways	heat shock protein binding			AKCACGYTCSC
General cellular processes / pleiotropic signal transduction pathways	regulation of cellular response to growth factor stimulus			AKCACGYTCSC
General cellular processes / pleiotropic signal transduction pathways	Notch signaling pathway			AKCACGYTCSC	CTCATCAKYG
General cellular processes / pleiotropic signal transduction pathways	regulation of Notch signaling pathway			AKCACGYTCSC
General cellular processes / pleiotropic signal transduction pathways	regulation of BMP signaling pathway			AKCACGYTCSC
General cellular processes / pleiotropic signal transduction pathways	BMP signaling pathway			AKCACGYTCSC
General cellular processes / pleiotropic signal transduction pathways	transmembrane receptor protein serine/threonine kinase signaling pathway			AKCACGYTCSC
General cellular processes / pleiotropic signal transduction pathways	regulation of transmembrane receptor protein serine/threonine kinase signaling pathway			AKCACGYTCSC
Hemopoiesis	iron ion binding			AKCACGYTCSC
Hemopoiesis	regulation of myeloid leukocyte differentiation				CTCATCAKYG
Hemopoiesis	regulation of myeloid cell differentiation			AKCACGYTCSC	CTCATCAKYG
Hemopoiesis	regulation of erythrocyte differentiation			AKCACGYTCSC	CTCATCAKYG
Hemopoiesis	erythrocyte differentiation			AKCACGYTCSC	CTCATCAKYG
Hemopoiesis	myeloid cell differentiation			AKCACGYTCSC	CTCATCAKYG
Hemopoiesis	regulation of hemopoiesis			AKCACGYTCSC	CTCATCAKYG
Hemopoiesis	erythrocyte homeostasis			AKCACGYTCSC	CTCATCAKYG
Hemopoiesis	myeloid cell homeostasis			AKCACGYTCSC	CTCATCAKYG
Hemopoiesis	positive regulation of myeloid cell differentiation			AKCACGYTCSC	CTCATCAKYG
Hemopoiesis	regulation of hematopoietic progenitor cell differentiation			AKCACGYTCSC	CTCATCAKYG
Hemopoiesis	hematopoietic progenitor cell differentiation			AKCACGYTCSC	CTCATCAKYG
Hemopoiesis	platelet morphogenesis				CTCATCAKYG
Hemopoiesis	lymphoid progenitor cell differentiation			AKCACGYTCSC
Hemopoiesis	granulocyte differentiation				CTCATCAKYG
Hemopoiesis	coagulation				CTCATCAKYG
Hemopoiesis	megakaryocyte differentiation				CTCATCAKYG
Hemopoiesis	hemostasis				CTCATCAKYG
Hemopoiesis	lymphocyte differentiation				CTCATCAKYG
Immune system development and function	type I interferon production	CACAATG
Immune system development and function	Regulation of type I interferon production	CACAATG
Immune system development and function	Positive regulation of type I interferon production	CACAATG
Immune system development and function	Regulation of interferon-beta production	CACAATG
Immune system development and function	Regulation of type I interferon production	CACAATG
Immune system development and function	type I interferon production	CACAATG
Immune system development and function	Positive regulation of type I interferon production	CACAATG
Immune system development and function	Regulation of interferon-beta production	CACAATG
Immune system development and function	interferon-beta production	CACAATG
Immune system development and function	Regulation of innate immune response	CACAATG
Immune system development and function	Positive regulation of defense response	CACAATG
Metabolic processes	Regulation of lipid transport		ACCACTANACCAC
Metabolic processes	fatty acid metabolic process		ACCACTANACCAC
Metabolic processes	monocarboxylic acid binding		ACCACTANACCAC
Metabolic processes	cellular lipid catabolic process		ACCACTANACCAC
Metabolic processes	lipid oxidation		ACCACTANACCAC
Metabolic processes	fatty acid oxidation		ACCACTANACCAC
Metabolic processes	lipid catabolic process		ACCACTANACCAC
Metabolic processes	monocarboxylic acid transport		ACCACTANACCAC
Metabolic processes	carboxylic acid binding		ACCACTANACCAC
Metabolic processes	organic acid binding		ACCACTANACCAC
Metabolic processes	cellular carbohydrate metabolic process		ACCACTANACCAC	AKCACGYTCSC
Metabolic processes	regulation of carbohydrate metabolic process		ACCACTANACCAC
Metabolic processes	positive regulation of hormone metabolic process			AKCACGYTCSC	CTCATCAKYG
Metabolic processes	regulation of hormone biosynthetic process			AKCACGYTCSC
Metabolic processes	positive regulation of nucleotide metabolic process			AKCACGYTCSC
Metabolic processes	positive regulation of ATP metabolic process			AKCACGYTCSC
Metabolic processes	glycolytic process			AKCACGYTCSC
Metabolic processes	positive regulation of purine nucleotide metabolic process			AKCACGYTCSC
Metabolic processes	ADP metabolic process			AKCACGYTCSC
Metabolic processes	ATP generation from ADP			AKCACGYTCSC
Metabolic processes	nucleoside diphosphate phosphorylation			AKCACGYTCSC
Metabolic processes	2-oxoglutarate-dependent dioxygenase activity			AKCACGYTCSC
Metabolic processes	purine ribonucleoside diphosphate metabolic process			AKCACGYTCSC
Metabolic processes	purine nucleoside diphosphate metabolic process			AKCACGYTCSC
Metabolic processes	nucleotide phosphorylation			AKCACGYTCSC
Metabolic processes	ribonucleoside diphosphate metabolic process			AKCACGYTCSC
Metabolic processes	pyruvate metabolic process			AKCACGYTCSC
Metabolic processes	nucleoside diphosphate metabolic process			AKCACGYTCSC
Metabolic processes	ATP metabolic process			AKCACGYTCSC
Metabolic processes	peptidyl-proline dioxygenase activity			AKCACGYTCSC
Metabolic processes	dioxygenase activity			AKCACGYTCSC
Metabolic processes	carbohydrate catabolic process			AKCACGYTCSC
Metabolic processes	regulation of purine nucleotide metabolic process			AKCACGYTCSC
Metabolic processes	regulation of ATP metabolic process			AKCACGYTCSC
Metabolic processes	regulation of glycolytic process			AKCACGYTCSC
Metabolic processes	regulation of nucleotide metabolic process			AKCACGYTCSC
Metabolic processes	positive regulation of small molecule metabolic process			AKCACGYTCSC
Metabolic processes	peptidyl-proline modification			AKCACGYTCSC
Metabolic processes	oxidoreductase activity, acting on paired donors, with incorporation or reduction of molecular oxygen			AKCACGYTCSC
Metabolic processes	regulation of carbohydrate metabolic process			AKCACGYTCSC
Metabolic processes	positive regulation of carbohydrate metabolic process			AKCACGYTCSC
Metabolic processes	regulation of carbohydrate catabolic process			AKCACGYTCSC
Metabolic processes	positive regulation of collagen metabolic process			AKCACGYTCSC
Metabolic processes	collagen biosynthetic process			AKCACGYTCSC
Metabolic processes	regulation of collagen biosynthetic process			AKCACGYTCSC
Metabolic processes	carbohydrate kinase activity			AKCACGYTCSC
Metabolic processes	regulation of hormone metabolic process			AKCACGYTCSC
Metabolic processes	negative regulation of small molecule metabolic process			AKCACGYTCSC
Metabolic processes	thyroid hormone metabolic process		ACCACTANACCAC
Metabolic processes	phenol-containing compound metabolic process		ACCACTANACCAC
Metabolic processes	cellular modified amino acid metabolic process		ACCACTANACCAC
Metabolic processes	hormone metabolic process		ACCACTANACCAC
Miscellaneous develomental processes	Glandular epithelial cell development			AKCACGYTCSC
Miscellaneous develomental processes	fat cell differentiation		ACCACTANACCAC	AKCACGYTCSC	CTCATCAKYG
Miscellaneous develomental processes	type B pancreatic cell differentiation		ACCACTANACCAC	AKCACGYTCSC
Miscellaneous develomental processes	enteroendocrine cell differentiation			AKCACGYTCSC
Miscellaneous develomental processes	placenta development		ACCACTANACCAC		CTCATCAKYG
Miscellaneous develomental processes	epithelial cell migration	CACAATG	ACCACTANACCAC		CTCATCAKYG
Miscellaneous develomental processes	epithelium migration	CACAATG	ACCACTANACCAC		CTCATCAKYG
Miscellaneous develomental processes	roof of mouth development		ACCACTANACCAC
miscellaneous develomental processes	columnar/cuboidal epithelial cell differentiation			AKCACGYTCSC	CTCATCAKYG
miscellaneous develomental processes	regulation of fat cell differentiation			AKCACGYTCSC	CTCATCAKYG
miscellaneous develomental processes	epithelial cell proliferation			AKCACGYTCSC	CTCATCAKYG
miscellaneous develomental processes	regulation of epithelial cell differentiation			AKCACGYTCSC
miscellaneous develomental processes	regulation of fat cell differentiation			AKCACGYTCSC
miscellaneous develomental processes	morphogenesis of a branching epithelium			AKCACGYTCSC	CTCATCAKYG
miscellaneous develomental processes	morphogenesis of a branching structure			AKCACGYTCSC	CTCATCAKYG
miscellaneous develomental processes	ear morphogenesis			AKCACGYTCSC	CTCATCAKYG
miscellaneous develomental processes	inner ear development			AKCACGYTCSC	CTCATCAKYG
miscellaneous develomental processes	ear development	CACAATG		AKCACGYTCSC	CTCATCAKYG
miscellaneous develomental processes	regulation of epithelial cell migration				CTCATCAKYG
miscellaneous develomental processes	regulation of epithelial cell proliferation				CTCATCAKYG
miscellaneous develomental processes	connective tissue development	CACAATG
miscellaneous develomental processes	negative regulation of epithelial cell migration	CACAATG
miscellaneous develomental processes	Hair cycle		ACCACTANACCAC	AKCACGYTCSC
miscellaneous develomental processes	molting cycle		ACCACTANACCAC	AKCACGYTCSC
miscellaneous develomental processes	cochlea development	CACAATG
Neural system development and function	Gliogenesis	CACAATG		AKCACGYTCSC
Neural system development and function	Glial cell differentiation	CACAATG		AKCACGYTCSC
Neural system development and function	Response to light stimulus		ACCACTANACCAC	AKCACGYTCSC
Neural system development and function	Oligodendrocyte differentiation	CACAATG		AKCACGYTCSC
Neural system development and function	Cellular response to light stimulus	CACAATG
Neural system development and function	Sensory organ development			AKCACGYTCSC	CTCATCAKYG
Neural system development and function	chordate embryonic development	CACAATG	ACCACTANACCAC	AKCACGYTCSC	CTCATCAKYG
Neural system development and function	epithelial tube formation		ACCACTANACCAC
Neural system development and function	tube formation		ACCACTANACCAC
Neural system development and function	regulation of amyloid-beta clearance		ACCACTANACCAC
Neural system development and function	embryonic camera-type eye development		ACCACTANACCAC
Neural system development and function	embryonic eye morphogenesis		ACCACTANACCAC
Neural system development and function	positive regulation of neuron projection development		ACCACTANACCAC
Neural system development and function	dendrite development		ACCACTANACCAC
Neural system development and function	regulation of nervous system development			AKCACGYTCSC
Neural system development and function	neuron death			AKCACGYTCSC
Neural system development and function	neuron apoptotic process			AKCACGYTCSC
Neural system development and function	branching morphogenesis of an epithelial tube			AKCACGYTCSC	CTCATCAKYG
Neural system development and function	epithelial tube morphogenesis	CACAATG		AKCACGYTCSC	CTCATCAKYG
Neural system development and function	regulation of neuron differentiation	CACAATG		AKCACGYTCSC	CTCATCAKYG
Neural system development and function	forebrain development			AKCACGYTCSC
Neural system development and function	negative regulation of neurogenesis			AKCACGYTCSC
Neural system development and function	oligodendrocyte development			AKCACGYTCSC
Neural system development and function	negative regulation of glial cell differentiation			AKCACGYTCSC
Neural system development and function	regulation of astrocyte differentiation			AKCACGYTCSC
Neural system development and function	negative regulation of nervous system development			AKCACGYTCSC
Neural system development and function	central nervous system neuron differentiation			AKCACGYTCSC
Neural system development and function	brain development			AKCACGYTCSC
Neural system development and function	regulation of oligodendrocyte differentiation			AKCACGYTCSC
Neural system development and function	astrocyte differentiation			AKCACGYTCSC
Neural system development and function	regulation of glial cell differentiation			AKCACGYTCSC
Neural system development and function	regulation of gliogenesis			AKCACGYTCSC
Neural system development and function	axon ensheathment in central nervous system			AKCACGYTCSC
Neural system development and function	negative regulation of gliogenesis			AKCACGYTCSC
Neural system development and function	autonomic nervous system development	CACAATG
Neural system development and function	neural crest cell differentiation	CACAATG
Neural system development and function	cranial nerve morphogenesis	CACAATG
Neural system development and function	camera-type eye photoreceptor cell differentiation	CACAATG
Regulation of circadian rhythm	circadian behavior			AKCACGYTCSC
Regulation of circadian rhythm	Rhythmic process	CACAATG	ACCACTANACCAC	AKCACGYTCSC
Regulation of circadian rhythm	circadian rhythm	CACAATG	ACCACTANACCAC	AKCACGYTCSC
Regulation of circadian rhythm	Rhythmic behaviour	CACAATG	ACCACTANACCAC
Regulation of circadian rhythm	entrainment of circadian clock			AKCACGYTCSC
Regulation of circadian rhythm	photoperiodism			AKCACGYTCSC
Regulation of circadian rhythm	rhythmic behavior	CACAATG		AKCACGYTCSC
Regulation of circadian rhythm	regulation of behavior			AKCACGYTCSC
Regulation of circadian rhythm	circadian sleep/wake cycle			AKCACGYTCSC
Regulation of circadian rhythm	behavior			AKCACGYTCSC
RNA-mediated gene silencing	Regulatory RNA binding	CACAATG
RNA-mediated gene silencing	regulation of translation, ncRNA-mediated			AKCACGYTCSC
RNA-mediated gene silencing	negative regulation of translation, ncRNA-mediated			AKCACGYTCSC
Skeletal system development	embryonic skeletal system development		ACCACTANACCAC
Skeletal system development	skeletal system morphogenesis	CACAATG	ACCACTANACCAC
Skeletal system development	skeletal system development		ACCACTANACCAC
Skeletal system development	cartilage development	CACAATG		AKCACGYTCSC
Skeletal system development	regulation of biomineralization			AKCACGYTCSC
Skeletal system development	negative regulation of biomineralization			AKCACGYTCSC
Skeletal system development	biomineralization			AKCACGYTCSC
Skeletal system development	regulation of cartilage development	CACAATG
Stem cell homeostatis and differentiation	Stem cell population maintenance	CACAATG	ACCACTANACCAC
Stem cell homeostatis and differentiation	Maintenance of cell number	CACAATG	ACCACTANACCAC
Stem cell homeostatis and differentiation	Cell fate commitment	CACAATG	ACCACTANACCAC	AKCACGYTCSC	CTCATCAKYG
Stem cell homeostatis and differentiation	Positive regulation of stem cell differentiation		ACCACTANACCAC		CTCATCAKYG
Stem cell homeostatis and differentiation	regulation of epithelial to mesenchymal transition		ACCACTANACCAC
Stem cell homeostatis and differentiation	stem cell differentiation		ACCACTANACCAC	AKCACGYTCSC	CTCATCAKYG
Stem cell homeostatis and differentiation	mesenchyme morphogenesis		ACCACTANACCAC	AKCACGYTCSC	CTCATCAKYG
Stem cell homeostatis and differentiation	cell fate determination	CACAATG	ACCACTANACCAC
Stem cell homeostatis and differentiation	negative regulation of cell migration		ACCACTANACCAC
Stem cell homeostatis and differentiation	homeostasis of number of cells			AKCACGYTCSC	CTCATCAKYG
Stem cell homeostatis and differentiation	regulation of stem cell population maintenance			AKCACGYTCSC	CTCATCAKYG
Stem cell homeostatis and differentiation	regulation of stem cell differentiation			AKCACGYTCSC	CTCATCAKYG
Stem cell homeostatis and differentiation	positive regulation of cell development			AKCACGYTCSC
Stem cell homeostatis and differentiation	cell fate specification				CTCATCAKYG
Stem cell homeostatis and differentiation	hematopoietic stem cell differentiation				CTCATCAKYG
Urogenital system development	Male gonad development	CACAATG
Urogenital system development	reproductive system development	CACAATG	ACCACTANACCAC	AKCACGYTCSC	CTCATCAKYG
Urogenital system development	reproductive structure development	CACAATG	ACCACTANACCAC	AKCACGYTCSC	CTCATCAKYG
Urogenital system development	renal system development		ACCACTANACCAC
Urogenital system development	urogenital system development		ACCACTANACCAC
Urogenital system development	metanephric nephron morphogenesis	CACAATG		AKCACGYTCSC	CTCATCAKYG
Urogenital system development	metanephros morphogenesis			AKCACGYTCSC	CTCATCAKYG
Urogenital system development	metanephric nephron development			AKCACGYTCSC	CTCATCAKYG
Urogenital system development	regulation of kidney development			AKCACGYTCSC	CTCATCAKYG
Urogenital system development	ureteric bud morphogenesis			AKCACGYTCSC	CTCATCAKYG
Urogenital system development	ureteric bud development			AKCACGYTCSC	CTCATCAKYG
Urogenital system development	epithelial cell differentiation involved in kidney development			AKCACGYTCSC	CTCATCAKYG
Urogenital system development	mesonephric tubule morphogenesis			AKCACGYTCSC	CTCATCAKYG
Urogenital system development	cell differentiation involved in kidney development			AKCACGYTCSC	CTCATCAKYG
Urogenital system development	metanephros development	CACAATG		AKCACGYTCSC	CTCATCAKYG
Urogenital system development	renal tubule morphogenesis			AKCACGYTCSC	CTCATCAKYG
Urogenital system development	nephron epithelium morphogenesis			AKCACGYTCSC	CTCATCAKYG
Urogenital system development	nephron tubule morphogenesis			AKCACGYTCSC	CTCATCAKYG
Urogenital system development	nephron morphogenesis			AKCACGYTCSC	CTCATCAKYG
Urogenital system development	mesonephros development			AKCACGYTCSC	CTCATCAKYG
Urogenital system development	mesonephric tubule development			AKCACGYTCSC	CTCATCAKYG
Urogenital system development	mesonephric epithelium development			AKCACGYTCSC	CTCATCAKYG
Urogenital system development	kidney morphogenesis			AKCACGYTCSC	CTCATCAKYG
Urogenital system development	nephron tubule development	CACAATG		AKCACGYTCSC	CTCATCAKYG
Urogenital system development	renal tubule development	CACAATG		AKCACGYTCSC	CTCATCAKYG
Urogenital system development	nephron epithelium development	CACAATG		AKCACGYTCSC	CTCATCAKYG
Urogenital system development	renal vesicle morphogenesis	CACAATG		AKCACGYTCSC	CTCATCAKYG
Urogenital system development	metanephric nephron tubule development	CACAATG		AKCACGYTCSC	CTCATCAKYG
Urogenital system development	nephron tubule epithelial cell differentiation			AKCACGYTCSC	CTCATCAKYG
Urogenital system development	kidney epithelium development	CACAATG		AKCACGYTCSC	CTCATCAKYG
Urogenital system development	metanephric tubule development	CACAATG		AKCACGYTCSC	CTCATCAKYG
Urogenital system development	regulation of epithelial cell differentiation involved in kidney development			AKCACGYTCSC	CTCATCAKYG
Urogenital system development	renal vesicle development	CACAATG		AKCACGYTCSC	CTCATCAKYG
Urogenital system development	metanephric glomerulus development			AKCACGYTCSC	CTCATCAKYG
Urogenital system development	kidney mesenchyme development			AKCACGYTCSC	CTCATCAKYG
Urogenital system development	metanephric epithelium development	CACAATG		AKCACGYTCSC	CTCATCAKYG
Urogenital system development	metanephric nephron epithelium development	CACAATG		AKCACGYTCSC	CTCATCAKYG
Urogenital system development	nephron development	CACAATG		AKCACGYTCSC	CTCATCAKYG
Urogenital system development	regulation of branching involved in ureteric bud morphogenesis	CACAATG		AKCACGYTCSC	CTCATCAKYG
Urogenital system development	cell differentiation involved in metanephros development			AKCACGYTCSC	CTCATCAKYG
Urogenital system development	branching involved in ureteric bud morphogenesis			AKCACGYTCSC	CTCATCAKYG
Urogenital system development	cell differentiation involved in metanephros development			AKCACGYTCSC
Urogenital system development	development of primary male sexual characteristics	CACAATG		AKCACGYTCSC	CTCATCAKYG
Urogenital system development	male sex differentiation	CACAATG		AKCACGYTCSC	CTCATCAKYG
Urogenital system development	gonad development	CACAATG		AKCACGYTCSC	CTCATCAKYG
Urogenital system development	development of primary sexual characteristics	CACAATG		AKCACGYTCSC	CTCATCAKYG
Urogenital system development	sex differentiation	CACAATG		AKCACGYTCSC	CTCATCAKYG
Temperature homeostasis	regulation of cold-induced thermogenesis		ACCACTANACCAC	AKCACGYTCSC
Temperature homeostasis	adaptive thermogenesis		ACCACTANACCAC	AKCACGYTCSC
Temperature homeostasis	temperature homeostasis		ACCACTANACCAC	AKCACGYTCSC
Temperature homeostasis	cold-induced thermogenesis		ACCACTANACCAC	AKCACGYTCSC
Apoptosis and cellular response to stress stimuli	positive regulation of response to biotic stimulus	CACAATG
Apoptosis and cellular response to stress stimuli	Response to UV			AKCACGYTCSC
Apoptosis and cellular response to stress stimuli	DNA damage response, signal transduction by p53 class mediator		ACCACTANACCAC
Apoptosis and cellular response to stress stimuli	mitotic G1 DNA damage checkpoint		ACCACTANACCAC
Apoptosis and cellular response to stress stimuli	signal transduction involved in mitotic DNA integrity checkpoint		ACCACTANACCAC
Apoptosis and cellular response to stress stimuli	signal transduction involved in mitotic G1 DNA damage checkpoint		ACCACTANACCAC
Apoptosis and cellular response to stress stimuli	signal transduction in response to DNA damage		ACCACTANACCAC
Apoptosis and cellular response to stress stimuli	signal transduction by p53 class mediator		ACCACTANACCAC
Apoptosis and cellular response to stress stimuli	signal transduction involved in mitotic DNA damage checkpoint		ACCACTANACCAC
Apoptosis and cellular response to stress stimuli	intracellular signal transduction involved in G1 DNA damage checkpoint		ACCACTANACCAC
Apoptosis and cellular response to stress stimuli	signal transduction involved in mitotic cell cycle checkpoint		ACCACTANACCAC
Apoptosis and cellular response to stress stimuli	G1 DNA damage checkpoint		ACCACTANACCAC
Apoptosis and cellular response to stress stimuli	signal transduction involved in DNA integrity checkpoint		ACCACTANACCAC
Apoptosis and cellular response to stress stimuli	signal transduction involved in cell cycle checkpoint		ACCACTANACCAC
Apoptosis and cellular response to stress stimuli	signal transduction involved in DNA damage checkpoint		ACCACTANACCAC
Apoptosis and cellular response to stress stimuli	mitotic DNA damage checkpoint		ACCACTANACCAC
Apoptosis and cellular response to stress stimuli	mitotic DNA integrity checkpoint		ACCACTANACCAC
Apoptosis and cellular response to stress stimuli	DNA damage checkpoint		ACCACTANACCAC
Apoptosis and cellular response to stress stimuli	DNA integrity checkpoint		ACCACTANACCAC
Apoptosis and cellular response to stress stimuli	muscle hypertrophy in response to stress		ACCACTANACCAC
Apoptosis and cellular response to stress stimuli	response to oxygen levels		ACCACTANACCAC	AKCACGYTCSC
Apoptosis and cellular response to stress stimuli	protein neddylation			AKCACGYTCSC
Apoptosis and cellular response to stress stimuli	cellular response to hypoxia			AKCACGYTCSC
Apoptosis and cellular response to stress stimuli	response to hypoxia			AKCACGYTCSC
Apoptosis and cellular response to stress stimuli	negative regulation of intrinsic apoptotic signaling pathway			AKCACGYTCSC
Apoptosis and cellular response to stress stimuli	intrinsic apoptotic signaling pathway			AKCACGYTCSC
Apoptosis and cellular response to stress stimuli	apoptotic process involved in development			AKCACGYTCSC	CTCATCAKYG
Apoptosis and cellular response to stress stimuli	cellular response to decreased oxygen levels			AKCACGYTCSC
Apoptosis and cellular response to stress stimuli	cellular response to oxygen levels			AKCACGYTCSC
Apoptosis and cellular response to stress stimuli	cellular response to radiation	CACAATG
Cell cycle related functions	G0 to G1 transition	CACAATG		AKCACGYTCSC
Cell cycle related functions	Regulation of G0 to G1 transition	CACAATG		AKCACGYTCSC
Cell cycle related functions	cell cycle arrest		ACCACTANACCAC		CTCATCAKYG
Cell cycle related functions	regulation of cell cycle arrest		ACCACTANACCAC		CTCATCAKYG
Cell cycle related functions	positive regulation of cell cycle arrest		ACCACTANACCAC
Cell cycle related functions	negative regulation of cell cycle G1/S phase transition		ACCACTANACCAC
Cell cycle related functions	regulation of G1/S transition of mitotic cell cycle		ACCACTANACCAC
Cell cycle related functions	mitotic G1/S transition checkpoint		ACCACTANACCAC
Cell cycle related functions	regulation of cell cycle G1/S phase transition		ACCACTANACCAC
Cell cycle related functions	negative regulation of G1/S transition of mitotic cell cycle		ACCACTANACCAC
Cell cycle related functions	G1/S transition of mitotic cell cycle		ACCACTANACCAC
Cell cycle related functions	negative regulation of mitotic cell cycle phase transition		ACCACTANACCAC
Cell cycle related functions	negative regulation of cell cycle phase transition		ACCACTANACCAC
Cell cycle related functions	cell cycle G1/S phase transition		ACCACTANACCAC	AKCACGYTCSC
Cell cycle related functions	negative regulation of mitotic cell cycle		ACCACTANACCAC
Cell cycle related functions	positive regulation of cell cycle process		ACCACTANACCAC
Cell cycle related functions	Positive regulation of cell cycle		ACCACTANACCAC
Cell cycle related functions	mitotic cell cycle checkpoint		ACCACTANACCAC
Cell cycle related functions	cell cycle checkpoint		ACCACTANACCAC
Muscle development	regulation of muscle cell differentiation		ACCACTANACCAC	AKCACGYTCSC	CTCATCAKYG
Muscle development	skeletal muscle cell differentiation	CACAATG
Muscle development	skeletal muscle cell differentiation		ACCACTANACCAC
Muscle development	regulation of striated muscle cell differentiation		ACCACTANACCAC	AKCACGYTCSC
Muscle development	muscle cell differentiation		ACCACTANACCAC	AKCACGYTCSC	CTCATCAKYG
Muscle development	muscle organ development		ACCACTANACCAC	AKCACGYTCSC	CTCATCAKYG
Muscle development	negative regulation of muscle cell apoptotic process		ACCACTANACCAC		CTCATCAKYG
Muscle development	striated muscle cell apoptotic process		ACCACTANACCAC		CTCATCAKYG
Muscle development	regulation of striated muscle cell apoptotic process		ACCACTANACCAC		CTCATCAKYG
Muscle development	muscle tissue morphogenesis		ACCACTANACCAC	AKCACGYTCSC	CTCATCAKYG
Muscle development	muscle organ morphogenesis		ACCACTANACCAC	AKCACGYTCSC	CTCATCAKYG
Muscle development	cardiac muscle cell proliferation		ACCACTANACCAC	AKCACGYTCSC	CTCATCAKYG
Muscle development	striated muscle cell differentiation		ACCACTANACCAC	AKCACGYTCSC
Muscle development	regulation of muscle system process		ACCACTANACCAC
Muscle development	regulation of cardiac muscle tissue growth		ACCACTANACCAC	AKCACGYTCSC
Muscle development	positive regulation of striated muscle cell differentiation		ACCACTANACCAC	AKCACGYTCSC
Muscle development	muscle cell apoptotic process		ACCACTANACCAC		CTCATCAKYG
Muscle development	regulation of muscle cell apoptotic process		ACCACTANACCAC		CTCATCAKYG
Muscle development	positive regulation of muscle cell differentiation		ACCACTANACCAC
Muscle development	muscle hypertrophy		ACCACTANACCAC
Muscle development	myoblast differentiation	CACAATG	ACCACTANACCAC	AKCACGYTCSC
Muscle development	cell proliferation involved in heart morphogenesis		ACCACTANACCAC	AKCACGYTCSC
Muscle development	muscle adaptation		ACCACTANACCAC
Muscle development	striated muscle cell development		ACCACTANACCAC	AKCACGYTCSC
Muscle development	muscle cell development		ACCACTANACCAC	AKCACGYTCSC
Muscle development	regulation of muscle contraction		ACCACTANACCAC
Muscle development	muscle cell proliferation		ACCACTANACCAC
Muscle development	regulation of muscle hypertrophy		ACCACTANACCAC
Muscle development	regulation of muscle adaptation		ACCACTANACCAC
Muscle development	regulation of skeletal muscle cell differentiation		ACCACTANACCAC
Muscle development	negative regulation of muscle hypertrophy		ACCACTANACCAC
Muscle development	muscle contraction		ACCACTANACCAC
Muscle development	regulation of actomyosin structure organization		ACCACTANACCAC
Muscle development	negative regulation of cell motility		ACCACTANACCAC
Muscle development	negative regulation of cellular component movement		ACCACTANACCAC
Muscle development	positive regulation of muscle contraction		ACCACTANACCAC
Muscle development	regulation of smooth muscle contraction		ACCACTANACCAC
Muscle development	positive regulation of muscle hypertrophy		ACCACTANACCAC
Muscle development	negative regulation of striated muscle cell differentiation		ACCACTANACCAC	AKCACGYTCSC
Muscle development	striated muscle adaptation		ACCACTANACCAC
Muscle development	smooth muscle cell differentiation			AKCACGYTCSC	CTCATCAKYG
Muscle development	negative regulation of muscle cell differentiation				CTCATCAKYG
Muscle development	muscle tissue development		ACCACTANACCAC	AKCACGYTCSC	CTCATCAKYG
Muscle development	vascular associated smooth muscle cell differentiation			AKCACGYTCSC	CTCATCAKYG
Muscle development	regulation of myotube differentiation			AKCACGYTCSC
Muscle development	myotube differentiation			AKCACGYTCSC
Muscle development	positive regulation of striated muscle tissue development	CACAATG
Modification process	protein hydroxylation			AKCACGYTCSC
Modification process	macromolecule deacylation	CACAATG
Modification process	protein deacylation	CACAATG
Modification process	Macromolecule deacetylation	CACAATG	ACCACTANACCAC
Modification process	protein deacetylation	CACAATG	ACCACTANACCAC
Modification process	protein acylation		ACCACTANACCAC
Modification process	protein acetylation		ACCACTANACCAC
Modification process	N-terminal protein amino acid acetylation			AKCACGYTCSC
Endothelial cell development and function	regulation of vascular endothelial growth factor production			AKCACGYTCSC
Endothelial cell development and function	vascular endothelial growth factor production			AKCACGYTCSC
Endothelial cell development and function	regulation of vascular endothelial growth factor receptor signaling pathway			AKCACGYTCSC
Endothelial cell development and function	vasculogenesis			AKCACGYTCSC	CTCATCAKYG
Endothelial cell development and function	endothelial cell differentiation			AKCACGYTCSC
Endothelial cell development and function	endothelium development			AKCACGYTCSC
Endothelial cell development and function	angiogenesis				CTCATCAKYG
Endothelial cell development and function	sprouting angiogenesis				CTCATCAKYG
Endothelial cell development and function	regulation of blood vessel endothelial cell migration	CACAATG
Endothelial cell development and function	negative regulation of endothelial cell migration	CACAATG
Endothelial cell development and function	endothelial cell migration	CACAATG	ACCACTANACCAC		CTCATCAKYG
Endothelial cell development and function	Blood vessel endothelial cell migration	CACAATG	ACCACTANACCAC		CTCATCAKYG
Endothelial cell development and function	regulation of endothelial cell migration	CACAATG			CTCATCAKYG
Endothelial cell development and function	endothelial cell differentiation			AKCACGYTCSC
Transport function	anion:sodium symporter activity			AKCACGYTCSC	CTCATCAKYG
Transport function	cation:chloride symporter activity			AKCACGYTCSC	CTCATCAKYG
Transport function	inorganic ion import across plasma membrane			AKCACGYTCSC	CTCATCAKYG
Transport function	inorganic cation import across plasma membrane				CTCATCAKYG
