# Supplementary material for: piRNAs in the human retina and retinal pigment epithelium reveal a potential role in intracellular trafficking and oxidative stress
Source: Royal Society of Chemistry journal article supplement (doi:10.1039/d3mo00122a), 2024-01-15
Supplement: d3mo00122a11.pdf [file d3mo00122a11.pdf]

The list of lncRNAs matched with piRNAs in retina and RPE

| <b>LncRNA name</b> | <b>Location</b>                            | <b>piRNA ID</b> | <b>No. of mismatches</b> | <b>Strand</b> |
|--------------------|--------------------------------------------|-----------------|--------------------------|---------------|
| lnc-ZNF169-7       | chromosome:GRCh38:9:94166258:94179563:1    | piR-hsa-11360   | 0                        | +             |
| lnc-ZNF169-7       | chromosome:GRCh38:9:94166258:94179563:1    | piR-hsa-11361   | 0                        | +             |
| lnc-NEMF-1         | chromosome:GRCh38:14:49861176:49862914:-1  | piR-hsa-11817   | 0                        | +             |
| Lnc-TIGD7-2        | chromosome:GRCh38:16:3307573:3308393:-1    | piR-hsa-1254    | 0                        | +             |
| LRRC75A-AS1        | chromosome:GRCh38:17:16439016:16442002:1   | piR-hsa-1834    | 0                        | +             |
| lnc-NEMF-1         | chromosome:GRCh38:14:49861176:49862864:-1  | piR-hsa-21131   | 0                        | +             |
| lnc-TLCD1-1        | chromosome:GRCh38:17:28721487:28722877:-1  | piR-hsa-2138    | 0                        | -             |
| Lnc-MAMDC2-4       | chromosome:GRCh38:9:70310875:70312120:1    | piR-hsa-23210   | 0                        | -             |
| Lnc-ZSCAN10-4      | chromosome:GRCh38:16:3156736:3157483:-1    | piR-hsa-23327   | 0                        | +             |
| Lnc-SDHC-3         | chromosome:GRCh38:1:161399409:161422424:1  | piR-hsa-23330   | 0                        | -             |
| Lnc-TRIM55-1       | chromosome:GRCh38:8:66113287:66115207:1    | piR-hsa-23574   | 1                        | +             |
| Lnc-ZSCAN10-4      | chromosome:GRCh38:16:3156736:3157483:-1    | piR-hsa-23619   | 1                        | +             |
| LINC01962          | chromosome:GRCh38:5:181187455:181189453:-1 | piR-hsa-23655   | 0                        | +             |
| Lnc-SDHC-3         | chromosome:GRCh38:1:161399409:161422424:1  | piR-hsa-23656   | 0                        | -             |
| LINC00623          | chromosome:GRCh38:1:120913328:121001622:1  | piR-hsa-24672   | 1                        | -             |
| Lnc-SDHC-3         | chromosome:GRCh38:1:161399409:161422424:1  | piR-hsa-24683   | 0                        | -             |
| Lnc-SDHC-3         | chromosome:GRCh38:1:161399409:161422424:1  | piR-hsa-24684   | 0                        | -             |

The list of lncRNAs matched with piRNAs

The list of lncRNAs matched with piRNAs in retina and RPE

The list of lncRNAs matched with piRNAs in retina and RPE

|                |                                                |               |   |   |
|----------------|------------------------------------------------|---------------|---|---|
| Lnc-KCNE1B-156 | chromosome:GRCh38:21:8<br>393419:8394341:-1    | piR-hsa-27282 | 0 | - |
| Lnc-KCNE1B-155 | chromosome:GRCh38:21:8<br>437629:8438551:-1    | piR-hsa-27282 | 0 | - |
| Lnc-KCNE1B-157 | chromosome:GRCh38:21:8<br>254592:8255514:-1    | piR-hsa-27282 | 0 | - |
| Lnc-KCNE1B-158 | chromosome:GRCh38:21:8<br>210384:8211306:-1    | piR-hsa-27282 | 0 | - |
| Lnc-ZSCAN10-4  | chromosome:GRCh38:16:3<br>156736:3157483:-1    | piR-hsa-27619 | 0 | + |
| Lnc-ZSCAN10-4  | chromosome:GRCh38:16:3<br>156736:3157483:-1    | piR-hsa-27620 | 0 | + |
| Lnc-ZSCAN10-4  | chromosome:GRCh38:16:3<br>156736:3157483:-1    | piR-hsa-27621 | 0 | + |
| Lnc-ZSCAN10-4  | chromosome:GRCh38:16:3<br>156736:3157483:-1    | piR-hsa-27622 | 0 | + |
| LINC00324      | chromosome:GRCh38:17:8<br>220624:8224043:-1    | piR-hsa-28223 | 1 | + |
| C8orf37-AS1    | chromosome:GRCh38:8:95<br>268832:95270322:1    | piR-hsa-28590 | 1 | - |
| SNHG14         | chromosome:GRCh38:15:2<br>4979557:25036490:1   | piR-hsa-28851 | 0 | + |
| LINC01962      | chromosome:GRCh38:5:18<br>1187455:181189453:-1 | piR-hsa-28876 | 0 | + |
| LINC01962      | chromosome:GRCh38:5:18<br>1187455:181189453:-1 | piR-hsa-28877 | 0 | + |
| Lnc-TIGD7-2    | chromosome:GRCh38:16:3<br>307573:3308393:-1    | piR-hsa-32153 | 0 | + |
| Lnc-TIGD7-2    | chromosome:GRCh38:16:3<br>307573:3308393:-1    | piR-hsa-32154 | 0 | + |
| lnc-NEMF-1     | chromosome:GRCh38:14:4<br>9861176:49862864:-1  | piR-hsa-32154 | 0 | + |
| Lnc-MAMDC2-4   | chromosome:GRCh38:9:70<br>310875:70312120:1    | piR-hsa-32160 | 0 | - |
| Lnc-MAMDC2-4   | chromosome:GRCh38:9:70<br>310875:70312120:1    | piR-hsa-32161 | 0 | - |
| Lnc-TIGD7-2    | chromosome:GRCh38:16:3<br>307573:3308393:-1    | piR-hsa-32165 | 0 | + |
| lnc-NEMF-1     | chromosome:GRCh38:14:4                         | piR-hsa-32168 | 0 | + |

The list of lncRNAs matched with piRNAs in retina and RPE

|              | 9861176:49862864:-1                           |               |   |   |
|--------------|-----------------------------------------------|---------------|---|---|
| lnc-MAMDC2-4 | chromosome:GRCh38:9:70<br>310875:70312120:1   | piR-hsa-32187 | 0 | - |
| lnc-NEMF-1   | chromosome:GRCh38:14:4<br>9861176:49862864:-1 | piR-hsa-32192 | 0 | + |
| Lnc-TIGD7-2  | chromosome:GRCh38:16:3<br>307573:3308393:-1   | piR-hsa-32194 | 0 | + |
| lnc-NEMF-1   | chromosome:GRCh38:14:4<br>9861176:49862864:-1 | piR-hsa-32194 | 0 | + |
| Lnc-MAMDC2-4 | chromosome:GRCh38:9:70<br>310875:70312120:1   | piR-hsa-32195 | 0 | - |
| Lnc-TIGD7-2  | chromosome:GRCh38:16:3<br>307573:3308393:-1   | piR-hsa-32201 | 0 | + |
| lnc-NEMF-1   | chromosome:GRCh38:14:4<br>9861176:49862864:-1 | piR-hsa-32201 | 0 | + |
| lnc-NEMF-1   | chromosome:GRCh38:14:4<br>9861176:49862864:-1 | piR-hsa-32207 | 0 | + |
| lnc-NEMF-1   | chromosome:GRCh38:14:4<br>9861176:49862864:-1 | piR-hsa-32213 | 0 | + |
| lnc-NEMF-1   | chromosome:GRCh38:14:4<br>9861176:49862864:-1 | piR-hsa-32221 | 0 | + |
| Lnc-MAMDC2-4 | chromosome:GRCh38:9:70<br>310875:70312120:1   | piR-hsa-32235 | 0 | - |
| lnc-MAMDC2-4 | chromosome:GRCh38:9:70<br>310875:70312120:1   | piR-hsa-32238 | 0 | - |
| lnc-NEMF-1   | chromosome:GRCh38:14:4<br>9861176:49862864:-1 | piR-hsa-32252 | 0 | + |
| lnc-NEMF-1   | chromosome:GRCh38:14:4<br>9861176:49862864:-1 | piR-hsa-32280 | 0 | + |
| lnc-FNBP1L-2 | chromosome:GRCh38:1:93<br>847174:93848939:1   | piR-hsa-32299 | 0 | + |
| lnc-NEMF-1   | chromosome:GRCh38:14:4<br>9861176:49862864:-1 | piR-hsa-32591 | 0 | + |
| Lnc-TIGD7-2  | chromosome:GRCh38:16:3<br>307573:3308393:-1   | piR-hsa-32641 | 0 | + |
| lnc-NEMF-1   | chromosome:GRCh38:14:4<br>9861176:49862864:-1 | piR-hsa-32641 | 0 | + |
| lnc-NEMF-1   | chromosome:GRCh38:14:4<br>9861176:49862864:-1 | piR-hsa-32658 | 0 | + |

The list of lncRNAs matched with piRNAs in retina and RPE

|                |                                               |               |   |   |
|----------------|-----------------------------------------------|---------------|---|---|
| lnc-NEMF-1     | chromosome:GRCh38:14:4<br>9861176:49862864:-1 | piR-hsa-32745 | 0 | + |
| Lnc-KCNE1B-156 | chromosome:GRCh38:21:8393<br>419:8394341:-1   | piR-hsa-3405  | 0 | - |
| Lnc-KCNE1B-155 | chromosome:GRCh38:21:8437<br>629:8438551:-1   | piR-hsa-3405  | 0 | - |
| Lnc-KCNE1B-157 | chromosome:GRCh38:21:8254<br>592:8255514:-1   | piR-hsa-3405  | 0 | - |
| Lnc-KCNE1B-158 | chromosome:GRCh38:21:8210<br>384:8211306:-1   | piR-hsa-3405  | 0 | - |
| Lnc-TRIM55-1   | chromosome:GRCh38:8:66113<br>287:66115207:1   | piR-hsa-4947  | 0 | + |
| Lnc-SDHC-3     | chromosome:GRCh38:1:16139<br>9409:161422424:1 | piR-hsa-6144  | 0 | - |
| Lnc-SDHC-3     | chromosome:GRCh38:1:16139<br>9409:161422424:1 | piR-hsa-6145  | 0 | - |
| Lnc-SDHC-3     | chromosome:GRCh38:1:16139<br>9409:161422424:1 | piR-hsa-6147  | 1 | - |
| Lnc-TRIM55-1   | chromosome:GRCh38:8:66113<br>287:66115207:1   | piR-hsa-6839  | 1 | + |
| Lnc-TRIM55-1   | chromosome:GRCh38:8:66113<br>287:66115207:1   | piR-hsa-6840  | 1 | + |
| lnc-DUOXA1-1   | chromosome:GRCh38:15:4519<br>8517:45199139:-1 | piR-hsa-7193  | 0 | + |
| Lnc-DUOXA1-2   | chromosome:GRCh38:15:4520<br>0325:45200632:-1 | piR-hsa-7193  | 0 | + |
| Lnc-TRIM55-1   | chromosome:GRCh38:8:66113<br>287:66115207:1   | piR-hsa-7239  | 1 | + |
| C8orf37-AS1    | chromosome:GRCh38:8:95268<br>832:95270322:1   | piR-hsa-32170 | 1 | - |
| lnc-NEMF-1     | chromosome:GRCh38:14:4986<br>1176:49862864:-1 | piR-hsa-32174 | 0 | + |
| lnc-NEMF-1     | chromosome:GRCh38:14:4986<br>1176:49862864:-1 | piR-hsa-32175 | 0 | + |
| lnc-NEMF-1     | chromosome:GRCh38:14:4986<br>1176:49862864:-1 | piR-hsa-32177 | 0 | + |
| lnc-NEMF-1     | chromosome:GRCh38:14:4986<br>1176:49862864:-1 | piR-hsa-32181 | 0 | + |
| lnc-NEMF-1     | chromosome:GRCh38:14:4986                     | piR-hsa-32184 | 0 | + |

The list of lncRNAs matched with piRNAs in retina and RPE

|                  |                                               |               |   |   |
|------------------|-----------------------------------------------|---------------|---|---|
|                  | 1176:49862864:-1                              |               |   |   |
| lnc-NEMF-1       | chromosome:GRCh38:14:4986<br>1176:49862864:-1 | piR-hsa-32185 | 0 | + |
| Lnc-<br>MAMDC2-4 | chromosome:GRCh38:9:70310<br>875:70312120:1   | piR-hsa-32186 | 0 | - |
