# Supplementary material for: piRNAs in the human retina and retinal pigment epithelium reveal a potential role in intracellular trafficking and oxidative stress
Source: Royal Society of Chemistry journal article supplement (doi:10.1039/d3mo00122a), 2024-01-15
Supplement: d3mo00122a12.pdf [file d3mo00122a12.pdf]

**The list of SnoRNAs matched with piRNAs in retina and RPE**

| snoRNA gene symbol  | piRNA ID      | No. of mismatches | Strand |
|---------------------|---------------|-------------------|--------|
| <b>1.SNORA113-8</b> | piR-hsa-26527 | 0                 | +      |
| <b>2.SNORA3A</b>    | piR-hsa-1359  | 0                 | +      |
| <b>3.SNORD100</b>   | piR-hsa-23884 | 0                 | +      |
|                     | piR-hsa-32220 | 0                 | +      |
|                     | piR-hsa-32765 | 0                 | +      |
|                     | piR-hsa-7549  | 0                 | +      |
|                     | piR-hsa-32538 | 0                 | +      |
| <b>4.SNORD107</b>   | piR-hsa-28851 | 0                 | +      |
| <b>5.SNORD110</b>   | piR-hsa-27283 | 0                 | +      |
| <b>6.SNORD114-1</b> | PiR-hsa-22905 | 0                 | +      |
| <b>7.SNORD15A</b>   | piR-hsa-24775 | 0                 | +      |
| <b>8.SNORD16</b>    | piR-hsa-26371 | 0                 | +      |
| <b>9.SNORD17</b>    | piR-hsa-23786 | 0                 | +      |
|                     | piR-hsa-3178  | 0                 | +      |
|                     | piR-hsa-12206 | 0                 | +      |
|                     | piR-hsa-2129  | 0                 | +      |
| <b>10.SNORD1B</b>   | piR-hsa-28629 | 0                 | +      |
|                     | piR-hsa-26039 | 0                 | +      |
| <b>11.SNORD38B</b>  | piR-hsa-1742  | 0                 | +      |
|                     | piR-hsa-1742  | 0                 | +      |
| <b>12.SNORD42B</b>  | piR-hsa-963   | 0                 | +      |
| <b>13.SNORD43</b>   | piR-hsa-952   | 0                 | +      |
| <b>14.SNORD49A</b>  | piR-hsa-1834  | 0                 | +      |
| <b>15.SNORD4A</b>   | piR-hsa-2138  | 0                 | +      |
| <b>16.SNORD51</b>   | piR-hsa-1823  | 0                 | +      |
|                     | piR-hsa-1823  | 0                 | +      |
| <b>17.SNORD54</b>   | piR-hsa-18286 | 0                 | +      |
|                     | piR-hsa-18287 | 0                 | +      |
|                     | piR-hsa-28209 | 1                 | +      |
|                     | piR-hsa-28210 | 1                 | +      |
| <b>18.SNORD57</b>   | piR-hsa-17444 | 0                 | +      |
|                     | piR-hsa-28019 | 0                 | +      |
| <b>19.SNORD58C</b>  | piR-hsa-25447 | 0                 | +      |
| <b>20.SNORD6</b>    | piR-hsa-1338  | 0                 | +      |
| <b>21.SNORD62A</b>  | piR-hsa-28318 | 0                 | +      |
|                     | piR-hsa-28319 | 1                 | +      |
| <b>22.SNORD62B</b>  | piR-hsa-28318 | 0                 | +      |
|                     | piR-hsa-28319 | 1                 | +      |
| <b>23.SNORD63</b>   | piR-hsa-993   | 0                 | +      |
| <b>24.SNORD71</b>   | piR-hsa-32180 | 0                 | +      |
| <b>25.SNORD71</b>   | piR-hsa-32172 | 0                 | +      |
|                     | piR-hsa-3200  | 0                 | +      |
|                     | piR-hsa-32256 | 0                 | +      |
|                     | piR-hsa-32260 | 0                 | +      |

**The list of SnoRNAs matched with piRNAs in retina and RPE**

|                    |               |   |   |
|--------------------|---------------|---|---|
|                    | piR-hsa-32163 | 0 | + |
| <b>26.SNORD8</b>   | piR-hsa-5370  | 0 | + |
| <b>27.SNORD82</b>  | piR-hsa-820   | 0 | + |
|                    | piR-hsa-32236 | 0 | + |
| <b>28.SNORD83B</b> | piR-hsa-28848 | 0 | + |
|                    | piR-hsa-28849 | 0 | + |
|                    | piR-hsa-28850 | 0 | + |
|                    | piR-hsa-3961  | 0 | + |
| <b>29.SNORD91A</b> | piR-hsa-23821 | 1 | + |
|                    | piR-hsa-23822 | 0 | + |
| <b>30.SNORD98</b>  | piR-hsa-317   | 0 | + |
|                    | piR-hsa-515   | 0 | + |
|                    | piR-hsa-32196 | 0 | + |
|                    | piR-hsa-1944  | 0 | + |
|                    | piR-hsa-32157 | 0 | + |
|                    | piR-hsa-32261 | 0 | + |
|                    | piR-hsa-32588 | 0 | + |
