# Supplementary material for: piRNAs in the human retina and retinal pigment epithelium reveal a potential role in intracellular trafficking and oxidative stress
Source: Royal Society of Chemistry journal article supplement (doi:10.1039/d3mo00122a), 2024-01-15
Supplement: d3mo00122a13.xlsx [file d3mo00122a13.xlsx]

## Sheet: 1 motif
motif_ID	motif_ALT_ID	motif_P-value	seq_ID	seq_Score	SnoRNA ID
1-CACAATG	STREME-1	0.03	piR-hsa-1944	12.84	SNORD98
1-CACAATG	STREME-1	0.03	piR-hsa-32261	12.84	SNORD98
1-CACAATG	STREME-1	0.03	piR-hsa-32163	12.84	SNORD71
1-CACAATG	STREME-1	0.03	piR-hsa-515	12.84	SNORD98
1-CACAATG	STREME-1	0.03	piR-hsa-32157	12.84	SNORD98
1-CACAATG	STREME-1	0.03	piR-hsa-32256	12.84	SNORD71
1-CACAATG	STREME-1	0.03	piR-hsa-32180	12.84	SNORD71
1-CACAATG	STREME-1	0.03	piR-hsa-317	12.84	SNORD98
1-CACAATG	STREME-1	0.03	piR-hsa-32260	12.84	SNORD71
1-CACAATG	STREME-1	0.03	piR-hsa-32196	12.84	SNORD98
1-CACAATG	STREME-1	0.03	piR-hsa-317	12.84	SNORD98
1-CACAATG	STREME-1	0.03	piR-hsa-32180	12.84	SNORD71
1-CACAATG	STREME-1	0.03	piR-hsa-32588	12.84	SNORD98
1-CACAATG	STREME-1	0.03	piR-hsa-3200	12.84	SNORD71
1-CACAATG	STREME-1	0.03	piR-hsa-32172	12.84	SNORD71
1-CACAATG	STREME-1	0.03	piR-hsa-12488	8.89
1-CACAATG	STREME-1	0.03	piR-hsa-12487	8.89
1-CACAATG	STREME-1	0.03	piR-hsa-3178	8.89	SNORD17
1-CACAATG	STREME-1	0.03	piR-hsa-23786	8.89	SNORD17
1-CACAATG	STREME-1	0.03	piR-hsa-12206	8.89	SNORD17
1-CACAATG	STREME-1	0.03	piR-hsa-18286	8.67	SNORD54
1-CACAATG	STREME-1	0.03	piR-hsa-28209	8.67	SNORD54
1-CACAATG	STREME-1	0.03	piR-hsa-28210	8.67	SNORD54
1-CACAATG	STREME-1	0.03	piR-hsa-18287	8.67	SNORD54
1-CACAATG	STREME-1	0.03	piR-hsa-3645	8.67
1-CACAATG	STREME-1	0.03	piR-hsa-32236	8.4	SNORD82
1-CACAATG	STREME-1	0.03	piR-hsa-820	8.4	SNORD82
1-CACAATG	STREME-1	0.03	piR-hsa-32198	7.99
1-CACAATG	STREME-1	0.03	piR-hsa-32176	7.99
1-CACAATG	STREME-1	0.03	piR-hsa-32199	7.99
1-CACAATG	STREME-1	0.03	piR-hsa-28845	7.99
1-CACAATG	STREME-1	0.03	piR-hsa-28846	7.99
1-CACAATG	STREME-1	0.03	piR-hsa-27282	7.99
1-CACAATG	STREME-1	0.03	piR-hsa-32256	7.99	SNORD71
1-CACAATG	STREME-1	0.03	piR-hsa-24360	7.99

## Sheet: 2 motif
motif_ID	motif_ALT_ID	motif_P-value	seq_ID	seq_Score	tRNA-derived small RNAs (tsRNAs)
1-ACCACTANACCAC	STREME-1	0.06	piR-hsa-1281	20.38
1-ACCACTANACCAC	STREME-1	0.06	piR-hsa-27492	20.38	5p-tRF from tRNA-Gly-TCC-2-1
1-ACCACTANACCAC	STREME-1	0.06	piR-hsa-1282	20.38
1-ACCACTANACCAC	STREME-1	0.06	piR-hsa-23230	18.74
1-ACCACTANACCAC	STREME-1	0.06	piR-hsa-5937	18.69	5p-tR-half from tRNA-Glu-CTC-1-5
1-ACCACTANACCAC	STREME-1	0.06	piR-hsa-23231	18.69	5p-tR-half from tRNA-Glu-CTC-1-5
1-ACCACTANACCAC	STREME-1	0.06	piR-hsa-5938	18.69	5p-tR-half from tRNA-Glu-CTC-1-5
1-ACCACTANACCAC	STREME-1	0.06	piR-hsa-5936	18.69	5p-tRF from tRNA-Glu-CTC-1-5
1-ACCACTANACCAC	STREME-1	0.06	piR-hsa-24672	18.69	5'tRF tRNA-Glu (CTC)
1-ACCACTANACCAC	STREME-1	0.06	piR-hsa-28190	18.04
1-ACCACTANACCAC	STREME-1	0.06	piR-hsa-28189	18.04
1-ACCACTANACCAC	STREME-1	0.06	piR-hsa-7193	18.04
1-ACCACTANACCAC	STREME-1	0.06	piR-hsa-28187	18.04
1-ACCACTANACCAC	STREME-1	0.06	piR-hsa-1580	18.04
1-ACCACTANACCAC	STREME-1	0.06	piR-hsa-28188	18.04
1-ACCACTANACCAC	STREME-1	0.06	piR-hsa-23289	17.84	tRNA-Und (NNN), 5’end interior
1-ACCACTANACCAC	STREME-1	0.06	piR-hsa-24684	17.64	tRNA-Val (CAC), 5’end interior
1-ACCACTANACCAC	STREME-1	0.06	piR-hsa-28877	17.64	5p-tR-half from tRNA-Val-AAC-2-1
1-ACCACTANACCAC	STREME-1	0.06	piR-hsa-6144	17.64	tRNA-Val (CAC), 5’end interior
1-ACCACTANACCAC	STREME-1	0.06	piR-hsa-23330	17.64	tRNA-Val (CAC), 5’end interior
1-ACCACTANACCAC	STREME-1	0.06	piR-hsa-6147	17.64
1-ACCACTANACCAC	STREME-1	0.06	piR-hsa-6145	17.64	tRNA-Val (CAC) , 5’end interior
1-ACCACTANACCAC	STREME-1	0.06	piR-hsa-24683	17.64	5' tRNA Val CAC, 5’end interior
1-ACCACTANACCAC	STREME-1	0.06	piR-hsa-23655	17.64	tRNA-Val AAC, 5'end interior
1-ACCACTANACCAC	STREME-1	0.06	piR-hsa-28876	17.64	5p-tR-half from tRNA-Val-AAC-2-1
1-ACCACTANACCAC	STREME-1	0.06	piR-hsa-23656	17.64	tRNA-Val CAC, 5'end interior
1-ACCACTANACCAC	STREME-1	0.06	piR-hsa-18709	16.42	5' tRNA-Gly GCC, 5’end interior
1-ACCACTANACCAC	STREME-1	0.06	piR-hsa-2107	16.42	5’ tRNA-Gly-GCC, 5’end interior
1-ACCACTANACCAC	STREME-1	0.06	piR-hsa-26508	16.42	5'tRF tRNA-Gly (CCC) and (GCC)
1-ACCACTANACCAC	STREME-1	0.06	piR-hsa-25782	16.42	5’ tRNA-Gly-GCC, 5’end interior
1-ACCACTANACCAC	STREME-1	0.06	piR-hsa-25779	16.42
1-ACCACTANACCAC	STREME-1	0.06	piR-hsa-25780	16.42	5’ tRNA-Gly-GCC and (CCC), 5end interior
1-ACCACTANACCAC	STREME-1	0.06	piR-hsa-28131	16.42	5'tRF tRNA-Gly (GCC)
1-ACCACTANACCAC	STREME-1	0.06	piR-hsa-1207	16.42	5'tRF tRNA-Gly (GCC)
1-ACCACTANACCAC	STREME-1	0.06	piR-hsa-27124	16.42	5'tRF tRNA-Gly (GCC)
1-ACCACTANACCAC	STREME-1	0.06	piR-hsa-12790	16.42
1-ACCACTANACCAC	STREME-1	0.06	piR-hsa-27493	16.42	5p-tR-half from tRNA-Gly-GCC-2-1
1-ACCACTANACCAC	STREME-1	0.06	piR-hsa-25783	16.42	5' tRNA-Gly GCC, 5’end interior
1-ACCACTANACCAC	STREME-1	0.06	piR-hsa-2106	16.42	tRNA-Gly (GCC), 5’end interior
1-ACCACTANACCAC	STREME-1	0.06	piR-hsa-25781	16.42	5’ tRNA-Gly-GCC, 5’end interior
1-ACCACTANACCAC	STREME-1	0.06	piR-hsa-1593	15.5
1-ACCACTANACCAC	STREME-1	0.06	piR-hsa-32170	13.74	5p-tRF from tRNA-Ser-AGA-2-5
1-ACCACTANACCAC	STREME-1	0.06	piR-hsa-26593	13.74	5p-tR-half from tRNA-Ser-GCT-2-1
1-ACCACTANACCAC	STREME-1	0.06	piR-hsa-28590	13.74	5p-tR-half from tRNA-Ser-AGA-2-5
1-ACCACTANACCAC	STREME-1	0.06	piR-hsa-26589	13.74	5p-tR-half from tRNA-Ser-GCT-2-1
1-ACCACTANACCAC	STREME-1	0.06	piR-hsa-26590	13.74	5p-tR-half from tRNA-Ser-GCT-2-1
1-ACCACTANACCAC	STREME-1	0.06	piR-hsa-28527	13.29	5p-tRF from tRNA-Gln-CTG-1-3
1-ACCACTANACCAC	STREME-1	0.06	piR-hsa-26508	13.23	5'tRF tRNA-Gly (CCC) and (GCC)
1-ACCACTANACCAC	STREME-1	0.06	piR-hsa-11360	12.99
1-ACCACTANACCAC	STREME-1	0.06	piR-hsa-6143	12.85	tRNA-Val (CAC), 5’end interior
1-ACCACTANACCAC	STREME-1	0.06	piR-hsa-28819	12.68	tRNA-Ala (CGC), 5’end interior
1-ACCACTANACCAC	STREME-1	0.06	piR-hsa-28392	12.68	5’tRF tRNA-Ala (AGC)
1-ACCACTANACCAC	STREME-1	0.06	piR-hsa-28403	12.68	5p-tRF half from Ala (AGC)
1-ACCACTANACCAC	STREME-1	0.06	piR-hsa-28401	12.68	5p-tR-half from tRNA-Ala-AGC-2-2
1-ACCACTANACCAC	STREME-1	0.06	piR-hsa-28391	12.68	5p-tR-half from tRNA-Ala-AGC-2-2
1-ACCACTANACCAC	STREME-1	0.06	piR-hsa-28374	12.68	5p-tR-half from tRNA-Ala-TGC-2-1
1-ACCACTANACCAC	STREME-1	0.06	piR-hsa-28405	12.68	5p-tR-half from tRNA-Ala-AGC-2-2
1-ACCACTANACCAC	STREME-1	0.06	piR-hsa-28402	12.68	5p-tRF from tRNA-Ala-AGC-2-2
1-ACCACTANACCAC	STREME-1	0.06	piR-hsa-28397	12.68	5p-tRF tRNA-Cys-GCA-2-1
1-ACCACTANACCAC	STREME-1	0.06	piR-hsa-28419	12.68	5'tRF tRNA-Ala(AGC)
1-ACCACTANACCAC	STREME-1	0.06	piR-hsa-28397	11.48	5p-tRF tRNA-Cys-GCA-2-1
1-ACCACTANACCAC	STREME-1	0.06	piR-hsa-28398	11.48	5p-tR-half from tRNA-Cys-GCA-2-1
1-ACCACTANACCAC	STREME-1	0.06	piR-hsa-28223	10.98	5p-tR-half from tRNA-Pro-TGG-2-1
1-ACCACTANACCAC	STREME-1	0.06	piR-hsa-11361	9.81

## Sheet: 3 motif
motif_ID	motif_ALT_ID	motif_P-value	seq_ID	seq_Score	tRNA-derived small RNAs (tsRNAs)
3-AKCACGYTCSC	STREME-3	0.5	piR-hsa-24684	17.84	tRNA-Val (CAC), 5’end interior
3-AKCACGYTCSC	STREME-3	0.5	piR-hsa-28877	17.84	5p-tR-half from tRNA-Val-AAC-2-1
3-AKCACGYTCSC	STREME-3	0.5	piR-hsa-6144	17.84	tRNA-Val (CAC), 5’end interior
3-AKCACGYTCSC	STREME-3	0.5	piR-hsa-6143	17.84
3-AKCACGYTCSC	STREME-3	0.5	piR-hsa-23330	17.84	tRNA-Val (CAC), 5’end interior
3-AKCACGYTCSC	STREME-3	0.5	piR-hsa-6147	17.84
3-AKCACGYTCSC	STREME-3	0.5	piR-hsa-6145	17.84	tRNA-Val (CAC) , 5’end interior
3-AKCACGYTCSC	STREME-3	0.5	piR-hsa-24683	17.84	5' tRNA Val CAC, 5’end interior
3-AKCACGYTCSC	STREME-3	0.5	piR-hsa-23655	17.84	tRNA-Val AAC, 5'end interior
3-AKCACGYTCSC	STREME-3	0.5	piR-hsa-28876	17.84	5p-tR-half from tRNA-Val-AAC-2-1
3-AKCACGYTCSC	STREME-3	0.5	piR-hsa-23656	17.84	tRNA-Val CAC, 5'end interior
3-AKCACGYTCSC	STREME-3	0.5	piR-hsa-27399	17.5	TRNA-Met-i-within
3-AKCACGYTCSC	STREME-3	0.5	piR-hsa-1100	17.5	TRNA-Met-i-within
3-AKCACGYTCSC	STREME-3	0.5	piR-hsa-13893	17.5	5p-tRF from tRNA-iMet-CAT-2-1
3-AKCACGYTCSC	STREME-3	0.5	piR-hsa-28116	17.5	5p-tR-half from tRNA-iMet-CAT-2-1
3-AKCACGYTCSC	STREME-3	0.5	piR-hsa-27398	17.5	TRNA-Met-i-within
3-AKCACGYTCSC	STREME-3	0.5	piR-hsa-12485	17.5	TRNA-Met-i-within
3-AKCACGYTCSC	STREME-3	0.5	piR-hsa-27400	17.5	TRNA-Met-i-within
3-AKCACGYTCSC	STREME-3	0.5	piR-hsa-28401	16.46	5p-tR-half from tRNA-Ala-AGC-2-2
3-AKCACGYTCSC	STREME-3	0.5	piR-hsa-28419	16.46	TRNA-Ala-GCY_-within
3-AKCACGYTCSC	STREME-3	0.5	piR-hsa-28819	14.69	tRNA-Ala (CGC), 5’end interior
3-AKCACGYTCSC	STREME-3	0.5	piR-hsa-28392	14.69	5’tRF tRNA-Ala (AGC)
3-AKCACGYTCSC	STREME-3	0.5	piR-hsa-28405	14.69	5p-tR-half from tRNA-Ala-AGC-2-2

## Sheet: 4 motif
motif_ALT_ID	motif_P-value	seq_ID	seq_Score	SnoRNA ID
4-CTCATCAKYG	0.5	piR-hsa-5370	16.13	SNORD8
4-CTCATCAKYG	0.5	piR-hsa-18286	14.86	SNORD54
4-CTCATCAKYG	0.5	piR-hsa-28209	14.86	SNORD54
4-CTCATCAKYG	0.5	piR-hsa-28210	14.86	SNORD54
4-CTCATCAKYG	0.5	piR-hsa-18287	14.86	SNORD54
4-CTCATCAKYG	0.5	piR-hsa-2129	14.1	SNORD17
4-CTCATCAKYG	0.5	piR-hsa-32198	14
4-CTCATCAKYG	0.5	piR-hsa-32176	14
4-CTCATCAKYG	0.5	piR-hsa-32199	14
4-CTCATCAKYG	0.5	piR-hsa-28845	14
4-CTCATCAKYG	0.5	piR-hsa-28846	14
4-CTCATCAKYG	0.5	piR-hsa-24360	14
4-CTCATCAKYG	0.5	piR-hsa-28850	13.58	SNORD83B
4-CTCATCAKYG	0.5	piR-hsa-28848	13.58	SNORD83B
4-CTCATCAKYG	0.5	piR-hsa-28849	13.58	SNORD83B
4-CTCATCAKYG	0.5	piR-hsa-3961	13.58	SNORD83B
4-CTCATCAKYG	0.5	piR-hsa-24775	12.85	SNORD15
4-CTCATCAKYG	0.5	piR-hsa-28487	12.81
4-CTCATCAKYG	0.5	piR-hsa-27616	11.1
4-CTCATCAKYG	0.5	piR-hsa-28629	9.84	SNORD1B
