# Supplementary material for: piRNAs in the human retina and retinal pigment epithelium reveal a potential role in intracellular trafficking and oxidative stress
Source: Royal Society of Chemistry journal article supplement (doi:10.1039/d3mo00122a), 2024-01-15
Supplement: d3mo00122a14.pdf [file d3mo00122a14.pdf]

**The list of tRNA-derived piRNAs in retina and RPE**

| <b>td-piRNAs (tRNA-Halves)</b> | <b>tRNAs</b>                      | <b>Mismatches</b> |
|--------------------------------|-----------------------------------|-------------------|
| piR-hsa-28398                  | 5p-tR-half from tRNA-Cys-GCA-2-1  | 1                 |
| piR-hsa-28876                  | 5p-tR-half from tRNA-Val-AAC-2-1  | 1                 |
| piR-hsa-28322                  | 3p-tR-half from tRNA-Gly-GCC-2-1  | 1                 |
| piR-hsa-28877                  | 5p-tR-half from tRNA-Val-AAC-2-1  | 1                 |
| piR-hsa-28223                  | 5p-tR-half from tRNA-Pro-TGG-2-1  | 1                 |
| piR-hsa-26589                  | 5p-tR-half from tRNA-Ser-GCT-2-1  | 1                 |
| piR-hsa-28116                  | 5p-tR-half from tRNA-iMet-CAT-2-1 | 1                 |
| piR-hsa-26593                  | 5p-tR-half from tRNA-Ser-GCT-2-1  | 1                 |
| piR-hsa-26590                  | 5p-tR-half from tRNA-Ser-GCT-2-1  | 1                 |
| piR-hsa-28374                  | 5p-tR-half from tRNA-Ala-TGC-2-1  | 1                 |
| piR-hsa-28405                  | 5p-tR-half from tRNA-Ala-AGC-2-2  | 1                 |
| piR-hsa-23231                  | 5p-tR-half from tRNA-Glu-CTC-1-5  | 1                 |
| piR-hsa-5937                   | 5p-tR-half from tRNA-Glu-CTC-1-5  | 1                 |
| piR-hsa-5938                   | 5p-tR-half from tRNA-Glu-CTC-1-5  | 1                 |
| piR-hsa-27493                  | 5p-tR-half from tRNA-Gly-GCC-2-1  | 1                 |
| piR-hsa-27620                  | 5p-tR-half from tRNA-Lys-CTT-3-1  | 0                 |
| piR-hsa-27621                  | 5p-tR-half from tRNA-Lys-CTT-3-1  | 0                 |
| piR-hsa-28403                  | 5p-tR half from Ala (AGC)         | 1                 |
| piR-hsa-27622                  | 5p-tR-half from tRNA-Lys-CTT-3-1  | 0                 |
| piR-hsa-28590                  | 5p-tR-half from tRNA-Ser-AGA-2-5  | 1                 |
| piR-hsa-24672                  | 5'tRF tRNA-Glu (CTC)              | 1                 |

### The list of tRNA-derived piRNAs in retina and RPE

|               |                      |   |
|---------------|----------------------|---|
| piR-hsa-28131 | 5'tRF tRNA-Gly (GCC) | 1 |
| piR-hsa-1207  | 5'tRF tRNA-Gly (GCC) | 1 |

| <b>td-piRNAs (tRFs)</b> | <b>tRNAs</b>                  | <b>Mismatches</b> |
|-------------------------|-------------------------------|-------------------|
| piR-hsa-7201            | 3p-tRF from tRNA-Thr-TGT-6-1  | 0                 |
| piR-hsa-28397           | 5p-tRF tRNA-Cys-GCA-2-1       | 1                 |
| piR-hsa-5067            | 3p-tRF from tRNA-Arg-ACG-1-1  | 1                 |
| piR-hsa-23574           | 3p-tRF from tRNA-Tyr-GTA-5-4  | 1                 |
| piR-hsa-7239            | 3p-tRF from tRNA-Tyr-GTA-5-4  | 1                 |
| piR-hsa-28402           | 5p-tRF from tRNA-Ala-AGC-2-2  | 1                 |
| piR-hsa-13893           | 5p-tRF from tRNA-iMet-CAT-2-1 | 1                 |
| piR-hsa-7238            | 3p-tRF from tRNA-Tyr-GTA-3-1  | 1                 |
| piR-hsa-27619           | 5p-tRF from tRNA-Lys-CTT-3-1  | 0                 |
| piR-hsa-32170           | 5p-tRF from tRNA-Ser-AGA-2-5  | 1                 |
| piR-hsa-28527           | 5p-tRF from tRNA-Gln-CTG-1-3  | 0                 |
| piR-hsa-5936            | 5p-tRF from tRNA-Glu-CTC-1-5  | 1                 |

### The list of tRNA-derived piRNAs in retina and RPE

| <b>td-piRNAs (itRFs)</b> | <b>tRNAs</b>                           | <b>Mismatches</b> |
|--------------------------|----------------------------------------|-------------------|
| piR-hsa-23619            | tRNA-lys (CTT) , 5'end interior        | 0                 |
| piR-hsa-31238            | tRNA-lys (NNN) and (CTT), central part | 0                 |
| piR-hsa-6840             | tRNA-Tyr (GTA), 3'end interior         | 1                 |
| piR-hsa-27398            | tRNA-iMet (CAT), 5'end interior        | 0                 |
| piR-hsa-2106             | tRNA-Gly (GCC), 5'end interior         | 0                 |
| piR-hsa-27399            | tRNA-iMet (CAT), 5'end interior        | 0                 |
| piR-hsa-12423            | tRNA-Arg-CCG, 3'end interior           | 1                 |
| piR-hsa-4947             | tRNA-Tyr (GTA), 3'end interior         | 0                 |
| piR-hsa-23327            | tRNA-Lys (CTT), 5'end interior         | 0                 |
| piR-hsa-3616             | tRNA-Arg (ACG), 3'end interior         | 0                 |
| piR-hsa-1008             | tRNA-Arg (CCG), 3'end interior         | 1                 |
| piR-hsa-1242             | tRNA-Lys (CTT), 5'end interior         | 1                 |
| piR-hsa-1243             | tRNA-Lys (CTT), 5'end interior         | 1                 |
| piR-hsa-6839             | tRNA-Tyr (GTA), 3'end interior         | 1                 |
| piR-hsa-28419            | tRNA-Ala (AGC), 5'end interior         | 1                 |
| piR-hsa-23655            | tRNA-Val AAC, 5'end interior           | 1                 |
| piR-hsa-20757            | 5' tRNA-Gly (CCC), 5'end interior      | 0                 |
| piR-hsa-18709            | 5' tRNA-Gly GCC, 5'end interior        | 0                 |

### The list of tRNA-derived piRNAs in retina and RPE

|               |                                          |   |
|---------------|------------------------------------------|---|
| piR-hsa-25783 | 5' tRNA-Gly GCC, 5'end interior          | 0 |
| piR-hsa-25782 | 5' tRNA-Gly-GCC, 5'end interior          | 0 |
| piR-hsa-25780 | 5' tRNA-Gly-GCC and (CCC), 5end interior | 0 |
| piR-hsa-2107  | 5' tRNA-Gly-GCC, 5'end interior          | 0 |
| piR-hsa-25781 | 5' tRNA-Gly-GCC, 5'end interior          | 0 |
| piR-hsa-23679 | tRNA-iMet (CAT), central part            | 0 |
| piR-hsa-1100  | tRNA-iMet (CAT), 5'end interior          | 1 |
| piR-hsa-12485 | tRNA-iMet (CAT), 5'end interior          | 1 |
| piR-hsa-31237 | tRNA-lys (CTT), central part             | 0 |
| piR-hsa-23289 | tRNA-Glu (CTC), 5'end interior           | 1 |
| piR-hsa-23638 | 3' tRNA-Gly (GCC)                        | 1 |
| piR-hsa-27400 | 5'tRNA-iMet (CAT)                        | 0 |
| piR-hsa-23637 | 3'tRNA Gly (GCC)                         | 1 |
